# Supplementary material
Source: Research Square preprint supplement (doi:10.21203/rs.3.rs-8944281/v1)
Supplement: Supplementary file 1 [file 9a69a2db173c94d4c23f30cf.xlsx]

## Sheet: ReadME
Forest Loss Footprint Dataset (2001-2022)
About
This dataset contains forest loss footprint data driven by international trade among 189 countries from 2001 to 2022, constructed based on Multi-Regional Input-Output (MRIO) model and forest loss driver analysis. Time Range: 2001-2022 (22 years) Unit: Hectares (ha) Country Coverage: 189 countries Data Dimension: 189×189 country flow matrix Unit: Hectares (ha)
Data Sources
Forest Loss Data: Sims et al. (2025) Global Forest Loss Drivers Dataset Spatial Resolution: 1km × 1km Coverage: 191 forest-holding countries Driver Classification: 7 categories (permanent agriculture, hard commodities, shifting cultivation, logging, settlements & infrastructure, wildfire, and other natural disturbances) Trade Data: Resolved Exiobase version 3 (REX3) Coverage: 189 countries, 163 i…
Methodology
Forest Loss Statistics Aggregate forest loss area by country, driver, and year Validate national statistics using GIS batch processing analysis Create cross-country forest loss distribution maps Driver Mapping Map 4 categories of anthropogenic forest loss drivers to MRIO database: Permanent Agriculture → Agricultural sectors Logging → Forestry sectors Hard Commodities → Mining/Energy sectors Sett…
Data Structure
Sheet1: Data Description (this page) Sheet2: Driver-Sector-Mapping Sheet3-24: Annual data for 2001-2022
Data Interpretation for Sheet3-24
Rows (Producer Countries): Countries where forest loss occurs Columns (Consumer Countries): Countries driving forest loss through trade consumption Values: Forest loss area (hectares) driven by consumer countries from producer countries through trade Diagonal: Forest loss driven by domestic consumption in each country
Usage Instructions
Data Precision: Based on 1km×1km remote sensing data and economic statistics, with certain uncertainties Drivers: Only includes anthropogenic drivers, excludes natural disturbances Time Lag: Potential time lag effects between trade flows and forest loss Currency Effects: MRIO data has been adjusted with country-specific deflation factors
Citation Information
Sims, M. J. et al. Global drivers of forest loss at 1 km resolution. Environmental Research Letters 20, 074027 (2025). https://doi.org/10.1088/1748-9326/add606. Hoang, N. T. & Kanemoto, K. Mapping the deforestation footprint of nations reveals growing threat to tropical forests. Nature Ecology & Evolution 1–9 (2021) doi:10.1038/s41559-021-01417-z.
Contact
For further questions regarding this data set, please contact Mimi Gong at Beijing Normal University (gongmimi@bnu.edu.cn).

## Sheet: Driver_Sector_Mapping
Driver		Sector
Hard commodities	20	Mining of coal and lignite; extraction of peat (10)
Hard commodities	21	Extraction of crude petroleum and services related to crude oil extraction, excluding surveying
Hard commodities	22	Extraction of natural gas and services related to natural gas extraction, excluding surveying
Hard commodities	23	Extraction, liquefaction, and regasification of other petroleum and gaseous materials
Hard commodities	24	Mining of uranium and thorium ores (12)
Hard commodities	25	Mining of iron ores
Hard commodities	26	Mining of copper ores and concentrates
Hard commodities	27	Mining of nickel ores and concentrates
Hard commodities	28	Mining of aluminium ores and concentrates
Hard commodities	29	Mining of precious metal ores and concentrates
Hard commodities	30	Mining of lead, zinc and tin ores and concentrates
Hard commodities	31	Mining of other non-ferrous metal ores and concentrates
Hard commodities	32	Quarrying of stone
Hard commodities	33	Quarrying of sand and clay
Hard commodities	34	Mining of chemical and fertilizer minerals, production of salt, other mining and quarrying n.e.c.
Hard commodities	54	Manufacture of coke oven products
Hard commodities	55	Petroleum Refinery
Hard commodities	67	Re-processing of ash into clinker
Hard commodities	69	Processing of nuclear fuel
Hard commodities	70	Manufacture of basic iron and steel and of ferro-alloys and first products thereof
Hard commodities	71	Re-processing of secondary steel into new steel
Hard commodities	72	Precious metals production
Hard commodities	73	Re-processing of secondary preciuos metals into new preciuos metals
Hard commodities	74	Aluminium production
Hard commodities	75	Re-processing of secondary aluminium into new aluminium
Hard commodities	76	Lead, zinc and tin production
Hard commodities	77	Re-processing of secondary lead into new lead, zinc and tin
Hard commodities	78	Copper production
Hard commodities	79	Re-processing of secondary copper into new copper
Hard commodities	80	Other non-ferrous metal production
Hard commodities	81	Re-processing of secondary other non-ferrous metals into new other non-ferrous metals
Hard commodities	95	Production of electricity by coal
Hard commodities	96	Production of electricity by gas
Hard commodities	97	Production of electricity by nuclear
Hard commodities	98	Production of electricity by hydro
Hard commodities	99	Production of electricity by wind
Hard commodities	100	Production of electricity by petroleum and other oil derivatives
Hard commodities	101	Production of electricity by biomass and waste
Hard commodities	102	Production of electricity by solar photovoltaic
Hard commodities	103	Production of electricity by solar thermal
Hard commodities	104	Production of electricity by tide, wave, ocean
Hard commodities	105	Production of electricity by Geothermal
Hard commodities	106	Production of electricity nec
Hard commodities	107	Transmission of electricity
Hard commodities	108	Distribution and trade of electricity
Logging	18	Forestry, logging and related service activities (02)
Logging	49	Manufacture of wood and of products of wood and cork, except furniture; manufacture of articles of straw and plaiting materials (20)
Logging	51	Pulp
Logging	53	Paper
Permanent agriculture	1	Cultivation of paddy rice
Permanent agriculture	2	Cultivation of wheat
Permanent agriculture	3	Cultivation of cereal grains nec
Permanent agriculture	4	Cultivation of vegetables, fruit, nuts
Permanent agriculture	5	Cultivation of oil seeds
Permanent agriculture	6	Cultivation of sugar cane, sugar beet
Permanent agriculture	7	Cultivation of plant-based fibers
Permanent agriculture	8	Cultivation of crops nec
Permanent agriculture	9	Cattle farming
Permanent agriculture	10	Pigs farming
Permanent agriculture	11	Poultry farming
Permanent agriculture	12	Meat animals nec
Permanent agriculture	13	Animal products nec
Permanent agriculture	14	Raw milk
Permanent agriculture	15	Wool, silk-worm cocoons
Permanent agriculture	16	Manure treatment (conventional), storage and land application
Permanent agriculture	17	Manure treatment (biogas), storage and land application
Permanent agriculture	19	Fishing, operating of fish hatcheries and fish farms; service activities incidental to fishing (05)
Permanent agriculture	35	Processing of meat cattle
Permanent agriculture	36	Processing of meat pigs
Permanent agriculture	37	Processing of meat poultry
Permanent agriculture	38	Production of meat products nec
Permanent agriculture	39	Processing vegetable oils and fats
Permanent agriculture	40	Processing of dairy products
Permanent agriculture	41	Processed rice
Permanent agriculture	42	Sugar refining
Permanent agriculture	43	Processing of Food products nec
Permanent agriculture	44	Manufacture of beverages
Permanent agriculture	45	Manufacture of fish products
Permanent agriculture	61	Manufacture of rubber and plastic products (25)
Permanent agriculture	90	Manufacture of tobacco products (16)
Settlements & Infrastructure	109	Manufacture of gas; distribution of gaseous fuels through mains
Settlements & Infrastructure	110	Steam and hot water supply
Settlements & Infrastructure	111	Collection, purification and distribution of water (41)
Settlements & Infrastructure	112	Construction (45)
Settlements & Infrastructure	113	Re-processing of secondary construction material into aggregates
Settlements & Infrastructure	118	Hotels and restaurants (55)
Settlements & Infrastructure	119	Transport via railways
Settlements & Infrastructure	120	Other land transport
Settlements & Infrastructure	121	Transport via pipelines
Settlements & Infrastructure	122	Sea and coastal water transport
Settlements & Infrastructure	123	Inland water transport
Settlements & Infrastructure	124	Air transport (62)
Settlements & Infrastructure	125	Supporting and auxiliary transport activities; activities of travel agencies (63)
Settlements & Infrastructure	126	Post and telecommunications (64)
Settlements & Infrastructure	130	Real estate activities (70)
	46	Manufacture of textiles (17)
	47	Manufacture of wearing apparel; dressing and dyeing of fur (18)
	48	Tanning and dressing of leather; manufacture of luggage, handbags, saddlery, harness and footwear (19)
	50	Re-processing of secondary wood material into new wood material
	52	Re-processing of secondary paper into new pulp
	56	Plastics, basic
	57	Re-processing of secondary plastic into new plastic
	58	N-fertiliser
	59	P- and other fertiliser
	60	Chemicals nec
	62	Manufacture of glass and glass products
	63	Re-processing of secondary glass into new glass
	64	Manufacture of ceramic goods
	65	Manufacture of bricks, tiles and construction products, in baked clay
	66	Manufacture of cement, lime and plaster
	68	Manufacture of other non-metallic mineral products n.e.c.
	82	Casting of metals
	83	Manufacture of machinery and equipment n.e.c. (29)
	84	Manufacture of office machinery and computers (30)
	85	Manufacture of electrical machinery and apparatus n.e.c. (31)
	86	Manufacture of radio, television and communication equipment and apparatus (32)
	87	Manufacture of medical, precision and optical instruments, watches and clocks (33)
	88	Manufacture of motor vehicles, trailers and semi-trailers (34)
	89	Manufacture of other transport equipment (35)
	91	Manufacture of fabricated metal products, except machinery and equipment (28)
	92	Manufacture of furniture; manufacturing n.e.c. (36)
	93	Recycling of waste and scrap
	94	Recycling of bottles by direct reuse
	114	Sale, maintenance, repair of motor vehicles, motor vehicles parts, motorcycles, motor cycles parts and accessoiries
	115	Retail trade, except of motor vehicles and motorcycles; repair of personal and household goods (52)
	116	Wholesale trade and commission trade, except of motor vehicles and motorcycles (51)
	117	Retail sale of automotive fuel
	127	Financial intermediation, except insurance and pension funding (65)
	128	Insurance and pension funding, except compulsory social security (66)
	129	Activities auxiliary to financial intermediation (67)
	131	Renting of machinery and equipment without operator and of personal and household goods (71)
	132	Other business activities (74)
	133	Public administration and defence; compulsory social security (75)
	134	Publishing, printing and reproduction of recorded media (22)
	135	Computer and related activities (72)
	136	Research and development (73)
	137	Education (80)
	138	Health and social work (85)
	139	Activities of membership organisation n.e.c. (91)
	140	Recreational, cultural and sporting activities (92)
	141	Other service activities (93)
	142	Extra-territorial organizations and bodies
	143	Private households with employed persons (95)
	144	Incineration of waste: Food
	145	Incineration of waste: Paper
	146	Incineration of waste: Plastic
	147	Incineration of waste: Metals and Inert materials
	148	Incineration of waste: Textiles
	149	Incineration of waste: Wood
	150	Incineration of waste: Oil/Hazardous waste
	151	Biogasification of food waste, incl. land application
	152	Biogasification of paper, incl. land application
	153	Biogasification of sewage slugde, incl. land application
	154	Composting of food waste, incl. land application
	155	Composting of paper and wood, incl. land application
	156	Waste water treatment, food
	157	Waste water treatment, other
	158	Landfill of waste: Food
	159	Landfill of waste: Paper
	160	Landfill of waste: Plastic
	161	Landfill of waste: Inert/metal/hazardous
	162	Landfill of waste: Textiles
	163	Landfill of waste: Wood
	164	households

## Sheet: 2001
GID	AUT	BEL	BGR	CYP	CZE	DEU	DNK	EST	ESP	FIN	FRA	GRC	HRV	HUN	IRL	ITA	LTU	LUX	LVA	MLT	NLD	POL	PRT	ROU	SWE	SVN	SVK	GBR	USA	JPN	CHN	CAN	KOR	BRA	IND	MEX	RUS	AUS	CHE	TUR	TWN	NOR	IDN	ZAF	AFG	ARM	AZE	BGD	BTN
AUT	3258.13	31.7962	3.14158	1.37595	33.4819	726.266	14.9021	0.726344	74.2906	11.3313	189.611	33.7653	25.6344	52.6246	11.2643	693.877	1.69118	2.47627	1.08262	1.30993	49.4676	59.0423	18.6673	14.5524	25.1435	31.9593	13.3215	155.635	290.002	161.995	69.1018	25.1533	16.0946	11.2946	10.5437	15.0659	34.9998	13.6258	154.086	23.5014	28.0178	15.3776	4.97248	4.18739	0.199003	0.428528	0.517745	0.671613	0.167172
BEL	6.11998	251.123	0.321244	0.308373	1.87542	93.2392	4.67881	0.164189	22.5933	2.3786	142.039	4.27379	0.627881	1.76508	6.21821	33.7259	0.312769	0.609116	0.214196	0.159055	67.6521	5.3892	4.48791	0.979291	6.36928	0.582159	0.647539	72.9128	49.3602	8.4197	13.1976	5.35046	5.51935	2.5516	3.00539	3.74096	4.41293	3.60721	8.77898	2.73115	1.40583	3.95403	1.33116	0.992041	0.0349526	0.0757695	0.0580861	0.162749	0.00577046
BGR	48.1811	21.7099	3387.69	10.4623	20.278	230.862	10.9152	0.59652	40.4353	7.55386	122.124	491.763	5.19481	22.2284	11.9277	348.495	1.41587	1.72512	0.967765	2.09139	39.4999	26.8661	9.37209	43.5235	30.6028	9.98642	4.02287	117.692	188.54	30.6574	36.2717	15.8443	11.738	8.78538	12.095	12.0085	56.0804	10.1373	22.5847	135.064	16.2422	12.8887	7.6616	2.26176	1.97335	6.29145	3.81761	0.618672	0.183671
CYP	0.0903596	0.0903537	0.0190424	8.36257	0.0664323	0.279153	0.0636919	0.00742634	0.182435	0.0434183	0.177226	0.423668	0.017798	0.052409	0.0953115	0.194245	0.00484712	0.0213028	0.00456888	0.00537237	0.11126	0.0656647	0.0535946	0.037631	0.111594	0.014155	0.0241544	0.60976	0.359099	0.147449	0.122207	0.0923804	0.0916274	0.0658355	0.101559	0.0830474	0.122704	0.0738984	0.101856	0.0633228	0.0456143	0.111047	0.063694	0.0464189	0.00216964	0.0394066	0.00154159	0.0129507	0.000992897
CZE	161.813	26.0064	3.89792	0.825474	1631.25	521.353	11.5668	0.504776	29.372	6.5439	77.8054	20.9973	9.53007	38.9442	5.35502	113.257	2.70882	1.56839	1.67624	0.289243	33.8449	83.5976	6.73223	16.8204	15.7719	14.5753	60.843	83.0454	117.876	30.4028	17.9805	7.77868	6.11877	4.63486	6.34179	6.47474	31.0749	7.99676	23.2161	7.58122	7.32652	9.98694	2.90866	1.41033	0.209425	0.272346	0.508153	0.439353	0.0461373
DEU	304.635	205.873	9.87842	3.72529	90.4431	7749.83	106.352	2.79992	270.841	41.0398	856.629	86.5831	20.4519	65.8891	44.8618	528.748	7.09881	14.2948	5.61622	1.96015	316.603	203.95	48.7292	26.3797	107.825	22.631	26.0353	655.676	836.122	123.481	202.305	55.2953	45.9737	44.2244	35.9864	41.6514	122.462	55.6167	268.238	67.6431	78.3957	61.0442	11.051	13.8029	0.545652	0.953962	1.40513	1.96135	0.0705332
DNK	34.9026	36.8432	1.23939	0.989464	10.7387	505.148	1503.73	1.82664	53.2377	29.3207	150.493	12.6034	3.88488	9.15985	20.3359	84.5814	2.60565	3.35141	2.17214	0.473203	73.7119	41.6801	13.8976	3.37417	228.196	2.54201	2.97424	250.334	195.038	65.83	84.2776	15.9383	14.4712	9.38449	8.42632	9.60973	18.891	13.4746	43.0781	7.73142	29.7423	167.849	4.02245	2.88879	0.222834	0.200722	0.433051	0.998351	0.0367236
EST	73.1833	105.15	6.18127	5.82766	32.2334	1141	383.312	7114.74	154.769	992.884	399.658	50.3258	23.9667	35.7721	153.435	266.729	44.594	7.93234	74.2965	2.24775	227.218	148.177	53.4379	11.6196	960.593	12.0812	11.7234	981.2	642.927	139.716	121.33	58.1764	44.1687	32.509	40.2441	36.7554	305.734	44.0338	76.1625	28.7565	64.2231	593.593	28.287	7.8325	0.884037	1.28047	3.69655	2.32331	0.585893
ESP	62.6845	118.264	5.87855	6.39352	20.9	617.266	36.976	1.19233	15543.4	28.5356	1470.27	99.262	9.96406	19.2273	57.6833	647.344	6.39134	9.47077	3.02666	4.18509	162.084	74.6017	921.209	13.8247	69.1597	9.60737	7.70536	690.009	1019.65	135.969	124.056	56.3019	44.563	79.0459	37.1604	137.17	90.2277	43.3121	84.5864	57.8849	36.8474	39.4603	16.8649	14.7441	0.494962	1.07479	1.14586	2.96163	0.104368
FIN	1234.65	1775.79	80.4007	44.8971	353.76	11718.9	1773.7	162.92	4454.74	51958.9	7385.6	1018.22	106.163	494.257	892.622	4268.67	104.968	111.141	112.001	15.6262	2793.77	1500.72	732.564	139.805	2622.99	105.448	220.583	12380.6	11312.7	3936.27	1996.12	726.595	651.097	800.176	559.233	646.831	2398.76	1097.83	1236.08	605.108	842.498	1871.26	144.479	158.776	5.91464	10.9009	15.5582	25.6085	0.827131
FRA	158.299	675.734	10.8201	6.15331	55.8663	1784.57	91.4877	2.19192	1418.49	55.9883	16624.3	152.441	22.3419	49.5579	110.02	1477.45	6.83651	46.9521	3.46555	4.60663	518.302	157.298	213.96	38.1447	127.278	22.3902	15.737	1670.35	1659.67	260.846	263.912	115.751	92.5914	82.7936	81.3419	91.7744	132.779	114.091	387.772	97.6958	99.4838	63.4614	23.7106	28.921	0.856591	1.87612	1.95482	4.76636	0.104149
GRC	9.14734	6.78947	19.7452	21.7317	4.02607	58.4541	4.92977	0.42404	20.3428	3.35032	30.4098	3235.18	5.35162	5.11421	3.78583	68.7936	0.435788	1.02489	0.50502	3.29601	15.7383	9.20846	5.02535	15.5059	8.74997	1.50733	1.5035	44.6869	68.5642	15.9422	18.3315	10.3222	10.5355	4.1995	5.69995	8.15419	34.3458	9.30758	11.5451	28.6449	3.25295	5.89909	3.87882	3.62448	0.798857	5.03006	1.42404	0.380975	0.0593292
HRV	51.6827	21.637	1.63779	1.81757	7.65938	160.857	8.65795	0.408695	39.0566	4.75844	68.7973	17.2736	1171.23	25.5371	3.64297	428.085	0.646629	2.15774	0.591251	0.470068	23.4394	9.79425	7.51407	4.53525	16.2929	109.925	4.55168	42.3937	72.5969	12.5226	14.0499	6.56591	5.0345	4.85172	9.10596	5.24074	11.9268	5.05466	19.8566	8.99309	6.19525	6.99379	3.28141	1.87267	0.0797438	0.20866	0.597732	0.209618	0.0488171
HUN	356.759	53.1895	13.9183	2.6819	101.241	834.494	76.0068	2.26329	89.3179	17.3721	217.925	63.4973	66.3123	2962.2	12.2323	470.478	8.59715	4.1003	4.09879	0.967767	96.4847	218.135	16.7695	158.272	58.306	49.1993	68.3852	156.38	345.221	43.3353	68.1805	17.5671	14.9476	11.1099	20.6152	14.3026	152.88	13.1775	59.8586	43.7906	28.3917	31.7949	6.47265	4.34324	0.300569	0.676717	1.24377	0.895583	0.180791
IRL	29.5457	93.4855	2.5921	3.67229	23.3032	371.594	49.6309	1.72798	184.33	25.9551	339.84	28.4547	4.98828	33.0451	2661.51	154.42	2.55406	12.3406	2.52386	2.78286	196.358	50.9751	23.4026	7.61136	119.35	3.13789	8.38566	2407.08	531.937	84.134	58.8786	40.6435	37.3468	23.3856	24.1206	38.4049	38.3283	41.8802	54.2619	23.6995	21.2445	64.6627	15.3148	15.0479	0.6413	0.435452	1.08741	1.4137	0.178285
ITA	46.6169	39.9553	4.32462	2.44067	11.2592	326.485	15.7295	0.56513	126.219	8.94254	320.944	63.455	13.1966	14.241	11.1128	5469.99	1.49882	2.8355	1.10826	2.16465	48.3323	32.5243	24.6773	18.0285	21.2885	14.6561	4.4352	181.427	367.305	52.8616	43.6757	23.4477	19.2089	20.7251	11.0923	19.1067	31.2813	23.2873	67.3341	24.7603	15.825	11.4491	4.4664	4.34107	0.105743	0.599823	0.523292	0.903088	0.031648
LTU	43.3429	97.5046	3.19019	2.49631	18.7944	917.115	182.163	26.4439	56.5819	57.4461	169.895	12.5859	3.98445	28.222	16.4698	104.06	3154.59	11.356	141.626	1.02731	115.238	259.27	18.5106	5.68655	234.657	4.18389	10.8262	426.015	653.539	66.5454	35.3549	73.3565	17.3054	10.2275	11.9683	16.9444	321.96	14.7508	38.2256	11.4715	16.1795	142.81	7.49304	3.62982	0.632368	2.32551	3.66878	1.325	0.61338
LUX	0.527646	0.442275	0.0284661	0.019372	0.165237	6.74653	0.407826	0.0122229	1.75285	0.21785	12.9941	0.413135	0.0614783	0.183083	0.401649	2.80862	0.0181543	8.83092	0.0144926	0.0139779	5.7545	0.498443	0.374103	0.088694	0.584747	0.0581495	0.0566158	5.26071	4.59627	0.68466	1.19635	0.373051	0.400121	0.261676	0.368866	0.357365	0.321176	0.326544	0.817833	0.274705	0.152415	0.343424	0.112617	0.202819	0.00511235	0.0168107	0.00691968	0.0132124	0.00397531
LVA	127.83	223.91	8.19582	5.84559	83.6544	2468.9	635.188	125.77	267.94	357.01	700.926	52.9947	12.0751	52.7094	354.984	365.057	159.232	22.617	7247.04	3.15574	458.375	247.796	42.6705	13.7646	1736.65	28.9686	43.9656	5226.28	1022.28	311.286	114.218	85.8658	45.5858	40.6635	37.463	42.8986	222.317	49.4088	116.968	36.9891	48.5664	352.765	23.7002	12.9718	4.82621	9.72622	2.89575	4.04027	1.78602
MLT	0.00227509	0.00187161	0.00084267	0.000675597	0.00158659	0.00551858	0.00179616	0.000390706	0.00304771	0.00193865	0.00357395	0.00262544	0.00088633	0.00165543	0.00165124	0.00425345	0.00040654	0.00067755	0.000345883	0.135734	0.00186314	0.00252913	0.0021892	0.00112235	0.00227383	0.000995707	0.00108592	0.00565456	0.00727437	0.00319762	0.00528089	0.00239545	0.00285543	0.00232613	0.00254429	0.00266603	0.00209149	0.00252512	0.00254179	0.0020374	0.00372929	0.00238839	0.00225619	0.000759436	2.59E-05	1.60E-05	3.39E-05	3.42E-05	1.31E-05
NLD	4.42813	19.0836	0.228844	0.176503	1.35955	54.3948	4.29836	0.0873618	12.4267	2.00791	44.7435	4.95854	0.625307	1.50262	3.43659	20.5924	0.162721	1.35534	0.12263	0.112661	236.826	5.53672	4.47314	0.650369	6.31365	0.579557	0.462306	41.4224	39.0726	6.15153	7.954	2.78474	2.51007	1.79383	2.73881	2.43523	3.52264	2.44875	5.61785	2.5097	3.18464	4.34719	0.856848	0.732395	0.0217399	0.053344	0.0624738	0.15258	0.00351465
POL	200.656	187.241	24.7923	4.83106	197.606	2695.34	167.47	16.542	232.226	54.2966	603.195	45.7369	58.3582	153.503	40.2585	544.464	108.939	16.6619	37.8911	2.12655	272.257	9107.98	35.9289	95.861	247.068	50.2993	85.1625	620.314	487.787	76.8866	111.183	54.0192	32.46	24.5192	28.9728	37.2282	486.362	28.1927	114.397	48.468	43.5623	115.32	11.878	10.9645	0.713968	1.21633	7.88819	1.70912	0.161819
PRT	87.7713	132.011	8.52091	5.30275	18.424	744.724	48.225	0.918209	1502.14	24.5299	1127.57	74.9514	7.59411	20.1242	43.2158	564.947	2.45212	9.01169	1.47622	3.62762	170.436	48.7476	8230.82	10.122	71.4386	7.00655	5.58606	655.116	960.868	132.881	157.575	53.3393	33.4555	63.7873	28.0289	50.033	38.6622	141.088	109.677	46.4192	52.8063	44.3678	10.2005	14.0349	1.07553	0.805538	0.826301	2.23845	0.166083
ROU	258.359	112.623	32.4792	16.3938	37.1942	1282.48	38.504	1.62683	269.235	17.0869	760.14	400.903	22.7447	352.254	21.6115	1523.35	1.90585	10.0278	1.442	3.64646	217.347	68.7925	34.7958	4386.16	98.2328	36.0752	15.0223	324.18	569.67	103.136	662.347	46.0288	52.6173	23.4715	49.5306	23.6713	54.3894	24.8132	94.6001	209.959	268.117	51.8903	14.6423	8.92085	0.499388	1.83373	2.78082	3.22375	0.204401
SWE	1196.13	1321.6	50.0479	76.6853	402.746	10714.4	4327.01	71.0587	3370.02	1533.38	5634.94	828.415	117.282	440.947	1161.09	4961.42	82.5663	115.762	119.692	21.8498	3511.27	1474.11	590.069	132.554	50798.1	104.964	129.83	12768.4	7801.03	3110.06	1625.68	542.625	501.088	411.794	486.584	525.77	870.166	675.043	1234.32	579.803	657.762	6991.84	273.501	192.423	3.42162	8.75751	12.9795	30.9767	1.01599
SVN	18.7748	3.58853	0.559217	0.193745	2.28153	69.2792	2.90902	0.120406	4.91043	1.54046	15.7291	2.12752	22.4675	4.84139	0.995552	51.9131	0.26366	0.400749	0.19553	0.0971392	4.16712	5.26381	1.62769	1.91579	3.80569	262.71	1.55983	13.1886	19.8068	3.03359	2.98135	1.54803	1.27485	1.19976	1.76534	1.25216	4.73555	1.47983	5.85653	2.06224	1.44604	1.86104	0.811339	0.374064	0.0943861	0.0405155	0.0918854	0.0477844	0.00950272
SVK	219.631	26.6518	3.87638	2.34837	114.673	400.755	18.9835	0.546798	57.6408	7.25567	142.152	44.4658	10.8951	135.858	5.95302	233.732	1.81364	1.96578	1.14093	0.5726	30.339	117.353	8.31953	32.7252	28.5828	20.2127	1565.91	93.0053	114.362	27.152	20.6392	10.9374	7.41747	5.49707	7.43372	6.8481	42.9121	6.86482	33.1598	8.11281	9.11419	13.4449	4.00773	1.73593	0.309555	1.25337	0.543945	0.405117	0.132831
GBR	48.2899	169.347	4.56647	6.6861	23.3495	585.146	63.0126	1.74152	234.059	37.4669	642.266	56.0669	5.65077	15.4441	617.887	305.363	3.68359	12.0564	3.5595	6.93079	221.256	67.1461	57.3509	12.7904	92.15	6.785	7.32831	12860	1290.66	135.713	97.678	80.2373	71.6927	34.5854	42.8344	46.1377	64.1111	83.3288	98.3356	46.1579	37.8096	65.2821	15.3869	24.1953	0.543699	1.25375	1.887	5.85839	0.115001
USA	755.09	1735.27	46.0981	75.3764	248.552	9709.1	516.645	16.7836	3684.31	327.917	5607.34	599.516	78.8948	215.144	1036.19	5775.13	33.4715	120.952	25.6889	20.4316	3282.49	617.769	610.727	128.243	946.907	79.4749	66.3235	12446.6	1.35582e+06	18249.4	9079.87	32576.7	5206.13	3184.15	1766.26	27487.6	949.104	2818.4	1599.48	940.568	3735.31	586.982	773.039	321.826	13.7585	26.3626	27.2304	112.342	1.66449
JPN	4.8965	11.9628	0.318238	0.589858	1.84379	72.4309	4.72002	0.196932	18.3348	3.57808	37.5	4.66962	0.647828	2.35406	4.91618	28.5405	0.200731	0.599371	0.0925935	0.365658	26.096	4.28038	3.05474	0.773971	7.27435	0.602663	0.579771	69.7299	651.21	20462.5	226.096	23.9454	76.0564	12.9749	15.2668	22.8907	6.68313	30.0145	8.47759	4.45095	102.224	6.85506	15.1993	1.49358	0.287643	0.0992478	0.205827	2.48019	0.0469948
CHN	131.752	381	11.7975	11.9599	64.1736	1648.61	138.363	10.2977	589.093	85.0792	1062.31	143.239	22.3573	72.1219	122.089	946.192	8.12941	14.5419	3.88121	5.58329	633.127	171.385	77.6645	29.2337	205.178	17.9251	17.4306	1874.06	13990.8	6365.11	150593	700.765	1442.32	208.002	328.25	397.263	321.079	624.537	214.485	103.78	175.323	142.191	211.785	69.1926	8.13755	1.81636	15.7714	103.098	0.353433
CAN	518.625	1098.38	32.905	29.2102	125.574	4742.7	292.937	8.18951	1824.04	235.7	3445.81	480.562	47.8302	116.903	608.184	3681.34	16.6133	62.5932	11.9482	15.5104	1489.91	330.517	364.073	69.059	631.74	46.6511	37.2975	7530.93	409703	22811.8	6705.37	249931	2553.21	2672.43	1726.86	6114.32	487.681	1539.12	854.458	405.498	2510.57	421.814	397.796	127.266	6.70554	14.3059	13.0038	82.5012	0.954025
KOR	3.22747	5.15037	0.288013	0.71808	1.06833	27.8293	2.85029	0.134684	12.1888	2.06535	17.7887	5.27571	0.456084	1.38848	2.86468	18.7161	0.154733	0.441982	0.0917966	0.404892	10.0561	3.1956	2.05818	0.850188	4.48506	0.403704	0.367574	32.1415	335.021	119.506	270.615	14.4998	3347.88	8.06645	22.9459	13.8713	10.5062	24.1092	4.92977	3.51715	133.129	3.94867	11.7707	1.7946	0.55711	0.0761681	0.214488	4.79599	0.0151042
BRA	1411.91	7800.78	732.679	141.777	1008.08	23348.7	1248.13	39.5169	10806.5	1222.99	17036.2	1660.85	644.928	1130.39	1434.78	15088.5	145.333	350.497	54.2629	66.0311	15915	2127.11	3564.43	2409.99	2145.73	794.639	185.564	17755.9	73408.7	18902.7	18783.9	3912.13	6532.44	2.15173e+06	5036.32	5627.4	20063.2	3114.66	2643.19	1146.42	6402.67	1424.7	1320.52	359.872	58.1096	113.048	309.999	2921.51	2.85097
IND	11.9608	23.225	1.39156	1.48208	4.69005	103.292	10.0011	0.386717	50.398	6.44296	77.7635	13.7648	1.76513	5.57113	8.67438	75.5095	0.901125	2.7855	0.632071	0.619497	38.9417	15.0804	12.0366	2.42053	16.2972	2.24454	1.72344	165.694	511.056	176.566	90.2523	32.6633	45.696	20.3945	22105.7	29.8547	54.4131	29.8243	20.8128	13.6046	36.0662	10.9254	37.4301	9.32694	3.08688	0.864728	0.819665	83.2214	0.581661
MEX	12.147	27.7233	0.896706	0.673474	3.40371	133.613	15.9856	0.24309	80.4284	4.91035	81.9867	9.99869	1.21787	3.81012	7.65697	57.0273	0.387123	1.40115	0.247585	0.244932	36.751	8.52215	9.48764	1.47725	11.7453	1.01369	0.970098	110.447	11561	407.38	76.2095	226.784	52.8136	53.3208	19.3494	128773	25.9732	30.6853	21.7584	6.4848	34.3133	9.86553	6.25726	2.04771	0.163302	0.444403	0.230365	0.999568	0.0387335
RUS	1961.08	4442.17	835.525	403.193	1079	15516.1	1789.91	2000.93	3593.27	10778.1	8390.13	2625.87	325.009	2077.52	3579.35	9319.18	1578.08	458.952	1620.77	50.7508	4381.49	2517.6	540.293	574.115	3791.31	262.178	862.323	14572.6	24670.5	29428.1	46806.7	1428.62	5441.25	679.592	6689.15	944.415	189896	948.778	1965.53	5916.59	16193.6	1660.19	476.074	238.958	114.353	336.981	1304.54	162.601	6.68182
AUS	38.6763	88.563	3.30606	3.508	11.0716	263.497	32.5075	1.40748	110.63	24.5862	206.822	47.7737	5.58196	19.0664	36.5329	208.979	1.80937	9.80246	1.34668	2.20688	122.465	28.0141	22.8518	7.96706	53.1586	4.3276	4.36602	668.155	2101.58	2861.69	1137.55	169.695	594.313	56.2143	220.478	105.65	52.9555	40216.9	72.6528	48.5827	456.742	37.7676	186.302	45.756	1.3929	1.78588	2.32654	38.2866	0.538929
CHE	25.3289	11.9047	0.765181	0.25068	2.94313	112.654	4.65353	0.122518	16.5925	2.28028	65.6572	3.97054	2.58464	4.54561	2.65353	60.9013	0.223055	0.981328	0.167301	0.107783	13.932	5.15721	2.68513	1.14251	4.94356	1.13327	1.14976	38.3047	56.187	11.8659	8.38542	3.82144	3.59331	3.24935	3.41799	3.17233	4.12799	3.35426	486.386	3.97338	2.84421	2.97444	1.02205	1.40575	0.0457125	0.168308	0.123724	0.232263	0.00712787
TUR	48.8134	61.6622	50.9928	37.9288	18.7854	508.496	29.5895	1.39403	122.616	13.9326	227.022	110.437	6.10694	20.211	26.2798	283.123	3.02442	6.56126	2.01879	2.32265	94.2833	41.4675	27.0754	69.2173	36.6469	6.85032	6.116	302.364	520.771	61.7471	96.3448	38.3685	31.7616	22.9897	29.0974	28.4167	131.257	28.128	44.1532	15026.1	27.7533	22.4304	12.9071	21.2412	1.96155	8.18963	44.2401	2.7366	0.12223
TWN	1.15326	2.86799	0.281586	0.165451	0.600901	14.1377	1.40508	0.109944	5.23712	0.812315	9.574	1.4945	0.276065	0.562329	1.14522	8.22328	0.130937	0.229808	0.0788421	0.0818271	6.15081	1.7746	0.89861	0.341632	1.76478	0.217688	0.267837	18.0942	117.276	72.4275	6.26042	6.84091	16.0672	1.78743	2.64908	4.13085	3.95744	7.63065	1.91645	1.02171	419.991	1.30463	3.49481	0.857588	0.0175058	0.0234307	0.0250813	0.508599	0.00676954
NOR	95.1101	192.536	4.57753	5.32595	34.8796	1112.87	359.942	5.56118	281.365	95.7244	504.441	96.0166	10.8384	31.6397	98.9287	400.946	12.6725	14.8204	5.24198	6.56836	315.032	100.85	65.5433	12.0196	1038.81	16.4774	13.5789	1580.7	1511.23	304.804	183.485	80.8417	91.7324	52.9023	62.4574	63.1905	70.9379	85.7983	154.323	49.7926	72.0374	11211.5	28.5638	18.5992	0.49587	0.852227	2.15139	3.45723	0.173894
IDN	636.532	1931.78	117.081	70.3077	221.024	6373.76	616.866	31.392	2562.63	288.838	3899.52	646.732	63.1039	263.163	451.245	3454.99	30.2313	191.383	15.3879	22.059	3461.7	845.815	618.625	180.95	681.02	122.102	101.239	7048.61	36143.9	29433.3	14851.7	2096.78	5886.47	1127.56	7129.73	1701.77	923.029	3642.1	797.872	987.926	6071.43	540.542	460343	413.492	103.875	14.0289	16.8495	1033.5	2.27771
ZAF	292.097	320.222	10.3183	14.4813	34.1059	1764.26	74.7691	3.20715	1392.76	79.0625	883.027	122.501	16.4364	48.3509	141.065	1214.77	4.87105	23.2375	3.07945	3.85275	398.526	79.7407	145.628	22.722	100.536	12.5901	12.2712	2670.93	3374.56	3360.04	1824.47	209.004	308.274	298.306	661.373	171.241	111.704	606.722	170.812	108.205	629.081	86.0431	159.166	41981.4	3.81934	3.01661	3.57073	24.3363	1.05503
AFG	0.213289	0.0658264	0.0116792	0.00292196	0.0159489	0.199133	0.184987	0.00702146	0.121708	0.0810712	0.530142	0.0409401	0.00706479	0.0555361	0.0383655	0.225305	0.00653676	0.0192353	0.00638101	0.00445454	0.0682025	0.0438014	0.0148993	0.00641698	0.057481	0.0466388	0.00669014	0.18085	0.4831	0.384471	0.198152	0.0499182	0.403531	0.0696322	6.62103	0.0773805	0.830787	0.0568731	0.0272503	0.0924011	0.0579764	0.019143	0.0528271	0.0243213	53.4023	0.00126194	0.00158817	0.00672397	0.000712717
ARM	0.506441	0.448998	0.0528924	0.0140895	0.0412141	0.758286	0.469826	0.0291549	0.458389	0.0815894	0.727304	0.171326	0.0246552	0.146998	0.236556	0.872316	0.361848	0.135681	0.0726389	0.0207866	0.50234	0.146261	0.0758828	0.0356445	0.198799	0.0537976	0.0329343	0.714576	3.9979	1.16553	0.621879	0.267322	4.34395	0.245682	0.411459	0.440646	4.88979	0.567653	0.222605	0.219812	0.693416	0.0768692	0.203013	0.120213	0.00992615	49.5167	0.013779	0.0130914	0.00444645
AZE	1.17866	0.577751	0.397285	0.0408717	0.337482	7.31812	0.619566	0.0707004	1.39065	0.189785	5.65047	0.760075	0.0645203	0.244904	0.460532	13.8022	0.226423	0.628754	0.188278	0.050426	8.39194	0.784293	0.327873	0.184066	0.44785	0.128421	0.112269	2.97679	16.0261	2.49303	1.34068	0.661972	8.48444	0.531365	0.996973	0.999313	12.7436	0.981807	0.437299	5.64453	1.3195	0.175171	0.390764	0.209035	0.076546	0.027493	232.321	0.0267129	0.00699283
BGD	2.53207	2.87458	0.0834365	0.0577187	0.362807	16.3238	2.96381	0.0666698	4.62022	7.00932	7.14826	0.847685	0.0821032	0.358917	2.83061	9.53133	0.0497766	0.685471	0.0570488	0.0369222	5.64139	2.14864	0.63456	0.121396	3.44923	0.11496	0.0932045	51.129	46.7647	7.26526	4.48731	4.52573	2.76345	0.754361	18.5479	0.992437	3.52776	1.39152	3.10331	0.529403	0.818955	2.82084	0.608264	0.506914	1.29171	0.0156982	0.0211349	2008.54	0.0139424
BTN	1.10775	0.356454	0.121765	0.0253735	0.0585326	1.00039	1.03428	0.0466033	1.44892	0.20146	1.82989	0.299046	0.0463624	0.271436	0.336603	2.37047	0.0460869	0.164379	0.0404975	0.0368533	0.924576	0.243824	0.140702	0.0556385	0.430252	0.0848756	0.060814	1.55466	7.43468	2.77852	0.815531	0.621595	12.4329	0.460196	17.2233	1.11153	1.4248	1.38938	0.155956	0.3925	1.6681	0.178554	0.59469	0.100004	0.0141091	0.0100585	0.0124287	0.220875	61.6884
BRN	4.59962	2.23671	0.355264	0.139629	0.345589	7.44119	3.57404	0.173747	3.85179	0.594345	6.99356	1.46049	0.184745	1.24611	1.42476	6.30667	0.186138	0.772773	0.145872	0.185991	3.89476	1.42644	0.590098	0.249893	1.66114	0.406184	0.205447	19.1592	66.9118	179.113	23.2872	2.72922	67.6689	2.01427	3.86038	4.7291	5.07376	15.3365	2.28448	1.60995	7.45089	0.706624	3.9417	0.913852	0.0448811	0.0347683	0.0496258	0.237549	0.0200078
KHM	124.174	40.6686	4.98357	1.58422	6.88655	220.357	81.1658	3.19322	70.0105	15.7326	130.264	30.4153	2.89225	26.8969	45.107	109.607	3.17376	8.40544	3.1515	2.21208	74.6136	22.14	13.22	2.92181	71.4842	8.98279	4.29573	262.555	1386.54	742.078	1681.24	79.2265	322.442	19.49	51.353	44.7185	105.902	78.8299	52.1901	26.4196	41.0468	54.6909	46.6106	11.8256	0.504223	0.437527	0.571903	3.07532	0.248507
PRK	12.2768	6.77015	2.12893	0.348019	1.19431	30.367	13.8888	1.0798	37.9794	1.95608	46.4234	5.22273	0.95748	3.3223	8.21802	43.6725	0.604829	2.4255	0.42865	0.36399	15.6756	5.37208	2.38561	1.82365	7.10348	1.49402	0.929622	27.9277	180.357	447.892	2093.69	9.29002	601.655	94.8962	20.5114	105.808	22.8642	17.1672	6.14912	4.85015	24.7639	2.46723	9.45037	4.38735	0.201251	0.130048	0.28779	1.08455	0.0999524
FJI	1.36412	1.63053	0.176793	0.129316	0.245197	10.8673	3.40301	0.0847131	7.82582	0.44329	11.0074	1.19359	0.117522	0.486215	1.33873	13.5728	0.113526	0.685738	0.0906194	0.151036	2.04883	0.658225	1.84068	0.192755	1.31573	0.188917	0.14608	15.9325	102.066	154.156	13.4833	4.48269	192.736	1.5282	3.02555	5.56844	2.48131	68.9263	0.831956	1.11941	17.773	0.745071	2.81244	0.762069	0.0611972	0.0430579	0.0533622	0.948892	0.0354005
PYF	0	0	0	0	0	0	0	0	0	0	0	0	0	0	0	0	0	0	0	0	0	0	0	0	0	0	0	0	0	0	0	0	0	0	0	0	0	0	0	0	0	0	0	0	0	0	0	0	0
GEO	0.881843	0.819766	0.335447	0.142376	0.336308	7.70148	3.83538	0.0872023	3.39308	0.287053	9.12896	4.44746	0.0961167	0.316628	0.732355	12.1385	0.390313	0.508873	0.1329	0.0868704	1.55654	0.773696	0.351713	0.230034	0.75639	0.14238	0.125507	3.98975	15.925	5.54343	3.43848	0.741128	65.4972	0.845884	1.58677	2.80721	12.747	3.89506	0.487083	15.0719	8.15788	0.342726	1.32216	0.473279	0.135531	0.855405	0.490526	0.0741546	0.0302053
HKG	0	0	0	0	0	0	0	0	0	0	0	0	0	0	0	0	0	0	0	0	0	0	0	0	0	0	0	0	0	0	0	0	0	0	0	0	0	0	0	0	0	0	0	0	0	0	0	0	0
KAZ	6.44016	5.21722	1.16583	0.541249	6.09814	35.7465	2.36399	0.885635	14.7509	3.60312	23.6253	6.9832	1.12042	2.56006	3.30955	47.5922	0.96501	2.45513	1.3513	0.535141	6.61632	6.55436	2.24706	5.25741	5.70634	0.864143	1.04635	19.7205	71.3169	15.1005	92.5375	2.85734	21.7729	3.71613	5.94363	5.24855	169.141	11.5629	3.64389	32.6129	11.8205	4.42773	3.45731	1.92137	2.31181	0.454052	4.3559	0.262691	0.0427929
KGZ	0.583464	0.67985	0.810393	0.0574485	0.258307	4.59974	1.75129	0.0832853	2.10275	0.458832	4.03481	0.454373	0.11139	0.331761	0.540679	8.35136	0.119593	0.644436	0.11058	0.106064	0.839055	0.557054	0.291265	0.191058	0.746253	0.133912	0.123221	2.88235	9.90205	4.75015	7.28	0.492014	48.5583	0.93974	2.56759	3.44841	7.12083	4.81325	0.371414	5.13779	9.10941	0.340686	1.29595	0.532906	0.586716	0.0385627	0.167109	0.064927	0.0220357
LAO	114.421	69.3972	8.26236	2.53728	52.1728	198.151	88.9188	4.20618	327.34	24.2984	295.466	29.6883	4.51187	106.384	26.2258	289.444	4.27967	14.2761	3.79024	2.92055	73.2482	39.13	15.7549	6.55589	35.5752	11.1377	43.0537	445.216	405.181	282.568	603.223	48.311	289.988	26.6329	40.9188	50.8986	140.377	48.4483	132.32	32.5977	67.7122	40.0907	59.577	11.424	0.678143	0.632036	0.808954	1.7016	0.372197
MAC	0	0	0	0	0	0	0	0	0	0	0	0	0	0	0	0	0	0	0	0	0	0	0	0	0	0	0	0	0	0	0	0	0	0	0	0	0	0	0	0	0	0	0	0	0	0	0	0	0
MYS	797.422	2307.98	120.478	111.232	397.848	7848.08	971.932	161.515	2915.43	793.334	6191.93	1100.58	101.341	485.614	1215.06	4953.21	119.022	213.482	74.0791	88.0493	5577.14	849.854	729.056	279.419	1354.46	123.043	151.893	11148.5	33135.4	36428	13685.7	3153.15	11338.4	1294.59	5458.07	1721.41	1238.02	4663.09	1233.12	1300.98	4598.53	778.765	10483.8	2010.43	16.9888	16.4319	18.2405	243.895	1.60401
MDV	0.0657545	0.0142761	0.00420915	0.000872331	0.00366063	0.101692	0.0530902	0.00246207	0.0448531	0.0092932	0.0531342	0.0198607	0.0023834	0.0180742	0.0191227	0.0467307	0.00275464	0.0072804	0.00215838	0.00107635	0.0264922	0.0106483	0.00758511	0.00270339	0.0162218	0.00582423	0.00252938	0.18953	0.28895	0.22641	0.0375424	0.0518174	0.0156901	0.0156205	0.0474074	0.0353345	0.0777476	0.0185702	0.00653818	0.0165093	0.00976524	0.00622558	0.0119039	0.00439552	0.000355822	0.000359966	0.000380918	0.000691564	0.00023772
MNG	3.5727	3.72002	0.510173	0.286795	2.48507	22.2281	10.4599	0.2805	16.3093	1.26441	25.7396	2.34663	0.364572	1.29442	3.05814	106.728	0.316933	1.42438	0.290872	0.279505	26.8859	2.84486	1.18362	0.593922	3.78406	0.433704	0.437187	24.3371	160.463	70.5829	1859.17	6.23447	523.89	3.30078	7.60696	51.3984	81.9564	17.3268	4.94662	3.21323	46.0025	1.69136	6.94543	1.65035	0.166282	0.120766	0.219239	0.653708	0.0964339
MMR	17.2795	27.3339	1.08461	0.924367	4.84746	71.786	15.2311	0.641098	25.9085	7.44264	56.2919	9.36897	1.04197	7.78329	7.35999	53.136	2.51625	3.26161	0.784624	1.13388	39.8555	14.8658	4.97934	1.7584	12.9106	1.42787	2.02421	308.677	528.116	507.077	887.065	51.7672	273.471	11.3998	3399.59	22.0321	20.1127	77.9766	20.5708	8.50095	57.3845	6.51758	112.285	9.01398	0.392904	0.168183	0.235907	118.268	0.102223
NPL	2.09399	1.01431	0.104723	0.0379264	0.246008	4.84047	1.67753	0.0634264	1.98177	0.310505	4.82221	0.632563	0.152239	0.52047	0.642395	3.86114	0.065158	0.592961	0.0589972	0.0420766	1.29076	0.529063	0.368814	0.0855646	5.85543	0.181493	0.0919562	5.38029	18.2463	8.69622	11.6713	1.37691	7.34129	0.660503	234.366	1.3209	2.40278	1.13726	2.69407	0.703371	1.02227	0.503582	0.560875	0.217381	0.0311928	0.0139119	0.0192331	0.520234	0.0456105
NCL	0.867078	0.59559	0.0853236	0.0368799	0.117717	1.9763	0.783867	0.044005	2.44671	0.642246	8.82862	0.281997	0.0636273	0.270897	0.32561	2.88203	0.0449619	0.174076	0.0381985	0.0646223	0.60619	0.309155	0.192602	0.0702062	0.411986	0.0947506	0.0598469	1.99858	13.0275	66.5323	2.80529	0.764518	10.4102	0.468715	0.879483	0.791789	1.21939	31.6015	0.624994	0.359552	2.14812	0.182851	0.573025	0.227217	0.00949766	0.00948487	0.0150374	0.0652146	0.00462706
NZL	60.3182	220.24	5.34407	5.46153	20.3744	637.188	74.388	3.15881	204.272	30.0412	409.138	48.3111	7.34852	20.4106	56.7413	501.447	4.26999	17.3135	4.79954	4.51719	364.4	38.0601	31.7302	8.73102	65.008	6.41472	6.53814	973.458	3796.59	3996.33	3607.73	257.249	4976.46	74.2859	230.146	236.941	89.7958	6372.94	100.953	42.3551	689.219	45.8524	308.678	107.572	1.55936	1.18205	2.26324	13.443	0.545247
PAK	0.103714	0.297645	0.00597308	0.0186152	0.0338594	1.09774	0.132272	0.00438348	0.362229	0.0481876	0.651978	0.1822	0.0097371	0.0290374	0.0865793	0.671002	0.00605745	0.0248624	0.00242246	0.00535872	0.440576	0.122261	0.137178	0.0195079	0.149587	0.0102978	0.0124613	2.49801	3.60319	1.2773	1.00832	0.386927	2.14661	0.0620392	1.65107	0.130654	0.0807606	0.247674	0.161532	0.113	0.0901234	0.163833	0.32282	0.235473	0.00353846	0.00912488	0.00547413	0.0606152	0.000345154
PNG	26.6017	72.2087	2.27231	0.967643	5.07182	872.876	18.5162	0.652363	41.7343	8.14091	73.9406	10.1981	1.1757	5.72801	14.4326	93.5291	0.766748	2.40272	0.557377	0.882471	56.1875	31.3217	31.6815	1.85116	16.0531	1.8485	2.04261	375.387	977.643	4596.24	225.139	28.1299	1353.24	8.25579	14.6114	22.1148	21.0393	277.522	9.75285	7.21522	48.866	6.0482	97.9558	4.0866	0.352588	0.184833	0.288246	2.06041	0.0601848
PHL	29.3261	57.992	1.7896	1.78992	7.40819	501.353	29.3939	1.09124	74.7071	20.4133	144.374	18.1293	2.49923	7.77942	24.1407	139.986	1.02565	3.33172	0.938205	2.02325	142.927	18.7354	10.5633	2.64805	35.7715	3.11585	4.00646	338.11	2427.03	2832.39	529.712	225.7	752.75	53.5381	48.2978	57.2742	36.2271	62.0442	82.7793	19.4713	67.4936	25.9479	133.89	44.9677	0.213472	0.418985	0.352005	2.83943	0.0862369
WSM	0	0	0	0	0	0	0	0	0	0	0	0	0	0	0	0	0	0	0	0	0	0	0	0	0	0	0	0	0	0	0	0	0	0	0	0	0	0	0	0	0	0	0	0	0	0	0	0	0
SGP	0.0991007	0.182346	0.0123325	0.0171267	0.0376857	0.920187	0.129323	0.00364111	0.366606	0.144216	0.691439	0.0924317	0.0141462	0.0422912	0.188439	0.612522	0.00483263	0.0430178	0.0167709	0.0173356	0.510908	0.102796	0.064671	0.0129604	0.148872	0.0160709	0.0127891	1.27729	4.39171	5.31097	1.93445	0.38013	1.03067	0.311641	1.26646	0.238434	0.174837	2.22994	0.228808	0.0800883	0.450232	0.0980949	1.29754	0.233331	0.00315914	0.00275863	0.00312011	0.0812897	0.000679884
LKA	11.4976	28.575	1.74705	1.19242	8.84853	133.727	7.76547	10.2739	32.7227	18.7371	112.924	11.4509	2.4352	7.26207	10.72	82.6418	7.27243	1.03993	41.2807	0.622066	47.1702	29.7608	6.58546	2.67927	15.8011	1.63688	3.14396	169.864	283.59	324.917	24.1689	27.8947	63.7879	7.93525	129.266	57.9176	382.189	23.2907	18.4918	107.113	6.74748	7.2632	5.94144	11.6106	0.255351	0.557138	2.90528	0.783141	0.0121501
TJK	0.128255	0.0304478	0.0372027	0.00172909	0.0318211	0.0942029	0.118802	0.00583788	0.0933324	0.0108992	0.202576	0.0359034	0.00819612	0.0278877	0.0220973	0.214456	0.00547566	0.0135502	0.00456025	0.0029408	0.0345651	0.0289677	0.0147516	0.00901571	0.0312708	0.0126534	0.0292168	0.0912468	0.341565	0.152157	0.15688	0.0227483	0.941733	0.0456241	0.042467	0.0634235	3.94243	0.0682356	0.0149526	0.0578497	0.130717	0.0652944	0.026133	0.00918246	0.0010033	0.000854956	0.0050607	0.00134957	0.000445692
THA	75.8746	222.968	6.94263	16.7188	46.2356	822.977	100.995	2.65356	331.922	88.7809	467.021	77.0496	9.71972	29.6574	53.3386	337.904	7.80176	26.7663	3.91083	7.2849	646.676	104.333	98.687	23.5969	186.78	7.71914	13.4198	983.739	3798.31	4070.12	1472.64	491.652	581.731	101.674	423.547	150.727	78.777	344.572	260.369	46.4273	212.476	107.007	380.023	159.872	1.07022	0.777026	1.48792	17.5927	0.167895
TKM	0.0831924	0.027663	0.00899673	0.00311553	0.0169182	0.0919446	0.0500142	0.00464044	0.0656567	0.0132362	0.136236	0.0534012	0.00340211	0.0216749	0.0146258	0.303581	0.00516633	0.00582245	0.0135585	0.00154742	0.024588	0.0205181	0.00674719	0.00759128	0.0236038	0.00642569	0.00639174	0.0671604	0.351498	0.0773062	0.0698795	0.0165675	0.0421726	0.0177327	0.0257662	0.0582579	0.726495	0.0169431	0.0237636	0.122497	0.0160635	0.00580881	0.0227016	0.00552652	0.0340614	0.00208249	0.0124458	0.000853543	0.000191391
USR	0	0	0	0	0	0	0	0	0	0	0	0	0	0	0	0	0	0	0	0	0	0	0	0	0	0	0	0	0	0	0	0	0	0	0	0	0	0	0	0	0	0	0	0	0	0	0	0	0
UZB	0.0769229	0.151348	0.050816	0.0101204	0.0591005	0.515945	0.057519	0.0590803	0.205665	0.0436581	0.621197	0.0993077	0.0252825	0.043519	0.0527907	0.74589	0.0425235	0.071872	0.0288198	0.0173661	0.172798	0.348764	0.109359	0.0399534	0.100013	0.0215164	0.0264753	0.415278	1.22183	0.650589	0.386925	0.187555	1.25536	0.156584	0.275964	0.127692	12.6326	0.318892	0.0887915	0.521358	0.245767	0.0349498	0.150535	0.0453933	0.00530831	0.00616949	0.0164676	0.00601335	0.00113667
VUT	0.350156	0.706604	0.0210572	0.00773979	0.0205275	2.73004	0.70843	0.0134081	0.41422	0.0536635	1.31857	0.0716083	0.0138407	0.0931956	0.109803	1.12763	0.015014	0.0558214	0.0124694	0.0105279	0.162686	0.0698143	0.0396002	0.0179163	0.138381	0.0300208	0.016037	0.452413	2.08237	10.0201	2.49043	0.249136	13.9023	0.0939558	0.394606	0.407682	0.421343	0.87109	0.186682	0.112443	0.891952	0.0417944	0.31406	0.0399229	0.00348756	0.00283681	0.0033755	0.444876	0.00243316
VNM	119.277	256.367	14.249	4.14223	159.219	1014.68	110.189	25.9329	421.067	47.2258	727.85	59.9268	12.8958	66.9567	32.3602	580.246	12.4835	16.3573	8.06579	3.01423	351.166	236.488	62.4312	63.8625	102.8	19.2648	50.0616	785.793	2399.34	2088.94	3635.61	265.608	1357.47	61.4885	307.324	95.6825	744.61	370.998	187.863	42.7866	823.857	94.3909	256.831	46.1354	1.07147	1.30042	1.42316	6.04415	0.164118
ATG	0.101889	0.0359429	0.0044408	0.00382634	0.00803519	0.966681	0.0536447	0.00273905	0.149411	0.0157407	0.336348	0.457949	0.00405077	0.0926977	0.0263873	0.238009	0.00350428	0.0236419	0.00287344	0.00241878	0.0469162	0.0544244	0.0148213	0.00585113	0.0367593	0.0070548	0.0268396	0.416829	3.06204	0.112976	0.148621	0.0598665	0.172917	0.087551	0.0369523	0.144788	0.173477	0.0437702	0.151231	0.0305585	0.0295648	0.0222989	0.245641	0.0409906	0.00259299	0.00309518	0.00262844	0.015324	0.00205594
ARG	84.9064	457.888	19.9555	44.7072	50.0028	1413.71	77.4184	3.54035	1684.96	39.1463	927.642	194.258	39.7194	50.9669	67.7139	980.523	26.1696	40.4551	6.16673	7.06855	1094.52	142.422	272.093	48.9833	101.709	29.3635	18.4335	870.831	4443.56	1045.52	2558.32	405.062	614.599	7736.9	1965.27	797.849	500.594	179.905	154.908	210.519	96.7152	90.8848	251.566	664.67	10.431	11.4986	30.0163	996.213	0.51193
ABW	0	0	0	0	0	0	0	0	0	0	0	0	0	0	0	0	0	0	0	0	0	0	0	0	0	0	0	0	0	0	0	0	0	0	0	0	0	0	0	0	0	0	0	0	0	0	0	0	0
BHS	0.428459	0.21724	0.0311463	0.038089	0.0824738	4.68766	0.378223	0.0249247	6.15651	0.144176	2.68939	1.20945	0.106752	0.145423	0.26309	2.08076	0.0184841	0.0394221	0.0279472	0.0152996	0.366264	0.277394	0.425414	0.0472925	0.173435	0.0464841	0.0341702	7.89731	26.4079	1.1409	0.784597	1.22101	0.21341	0.730735	0.215918	1.62194	0.823752	0.887814	4.37073	0.173352	0.115068	0.116135	0.0896203	0.16059	0.00906871	0.113105	0.0095322	0.0151333	0.00643895
BRB	0.0493385	0.0164352	0.00106201	0.000650032	0.00284552	0.240701	0.0155377	0.00054014	0.0420971	0.00364043	0.303099	0.00744403	0.00117331	0.00566931	0.016714	0.295544	0.000692341	0.00199419	0.000541266	0.000637007	0.0239757	0.0130155	0.0052193	0.00156058	0.010257	0.00188783	0.00142269	0.723249	1.12748	0.0345643	0.0403819	0.079655	0.0105384	0.0442295	0.0139237	0.0354265	0.0349888	0.0139271	0.0239769	0.00743769	0.00867578	0.00687017	0.00662756	0.00402399	0.000469345	0.000461386	0.000499624	0.000933033	0.000350549
BLZ	7.10753	4.04955	1.90625	0.905348	0.610167	48.4788	3.00289	0.322884	90.1513	1.16439	60.7518	2.42145	0.337083	1.13152	45.6685	63.8411	0.209681	0.696983	0.161619	0.423928	12.7802	2.55942	40.9937	0.383151	2.82239	0.398921	0.344463	445.666	588.382	829.658	20.4329	20.3179	96.4045	8.42092	26.8999	18.5363	33.2731	3.99486	4.55563	1.85765	5.20461	1.76612	4.54541	1.17301	0.139259	0.2211	0.187648	0.441949	0.0861895
BMU	0	0	0	0	0	0	0	0	0	0	0	0	0	0	0	0	0	0	0	0	0	0	0	0	0	0	0	0	0	0	0	0	0	0	0	0	0	0	0	0	0	0	0	0	0	0	0	0	0
BOL	201.278	80.7326	8.06216	2.3625	16.3945	899.91	79.9516	2.37249	345.054	19.6477	669.051	46.4871	3.27849	27.7139	24.4793	635.811	6.3755	9.72019	2.35494	6.32824	315.607	76.9102	50.1578	5.61812	39.251	9.22746	4.79285	643.692	7057.29	1443.08	434.355	207.83	79.1861	883.328	127.829	297.083	222.681	86.9109	72.1822	32.1752	35.4492	16.2346	17.6345	14.7443	2.49619	2.02565	2.19055	4.5242	1.81807
VGB	0.0280736	0.00963082	0.00108451	0.000397788	0.00138373	0.113775	0.0157767	0.000705799	0.0586522	0.0032426	0.113252	0.00546573	0.00124321	0.00645032	0.00445911	0.119117	0.000920661	0.00163362	0.000729032	0.000366864	0.0109814	0.0164613	0.00277009	0.001815	0.00630401	0.00198719	0.00092824	0.0346496	1.02232	0.0157334	0.0377859	0.00928019	0.00512034	0.0204338	0.00833488	0.0386768	0.073514	0.0195846	0.356667	0.0140551	0.00597331	0.00218353	0.00542336	0.0406773	0.000529523	0.0996455	0.00627196	0.000694074	0.000403503
CYM	0.0408284	0.0134141	0.00133513	0.000803381	0.00205422	0.17726	0.0252882	0.00107618	0.181373	0.00458067	0.162929	0.0131757	0.00122355	0.0102759	0.00805354	0.158986	0.00140469	0.00213817	0.00104223	0.000688223	0.0142581	0.0258848	0.00475973	0.0017735	0.0102944	0.00304633	0.00301184	0.0428826	1.586	0.0460436	0.0595572	0.0186945	0.00912821	0.0302434	0.0112356	0.0645278	0.0947635	0.0131487	0.0188797	0.0109803	0.0307682	0.367258	0.00591038	0.00274827	0.000887122	0.000740743	0.000783664	0.00118177	0.000763529
CHL	57.516	143.379	6.7612	3.49154	16.5119	700.187	157.463	2.78656	978.87	39.0773	556.088	55.5772	7.58769	17.9828	79.1025	1163.62	4.55994	11.8345	5.63458	2.0068	521.515	39.8991	131.208	9.40592	91.2452	8.79212	5.74275	776.804	14227.8	4246.79	1133.79	801.05	666.947	944.087	125.431	1888.55	102.253	155.269	141.714	58.3112	268.282	138.788	161.559	42.4308	1.14512	1.81211	1.61213	18.3404	0.757372
COL	288.416	1440.35	12.537	19.1081	140.911	4187.51	640.887	7.52191	1068.43	201.25	1591.8	193.89	65.9831	76.4685	181.634	3074.44	10.985	356.058	3.94645	7.06438	848.072	144.081	279.609	48.0295	438.525	71.8391	42.5634	2661.44	18940.7	2579	313.592	1035.94	274.454	408.488	126.757	937.851	985.095	276.039	353.89	92.9697	117.503	293.137	33.597	61.8003	5.3789	3.10506	6.44558	10.1767	0.600648
CRI	76.3632	254.522	3.41234	0.729014	18.9582	423.51	8.774	1.45066	135.782	100.294	219.233	11.6194	5.47399	4.24034	20.9551	401.301	2.54448	1.26617	0.449724	1.02196	142.159	23.0562	86.0388	7.37284	137.851	5.33848	6.4009	477.199	4191.38	122.24	92.8515	133.37	32.3326	12.8486	5.01893	257.615	75.3562	15.9015	77.7385	9.08154	7.55087	46.7145	3.41823	15.6548	0.179593	1.04551	0.34157	0.617494	0.0602269
CUB	14.1945	38.9987	18.4794	38.0403	3.99587	126.3	9.4031	1.00718	579.578	6.32182	224.58	5.7613	1.62011	3.17121	5.83578	287.671	1.31395	4.44904	1.10324	1.25732	89.1798	9.7581	33.434	80.5784	8.55261	1.49598	1.18118	127.735	243.009	101.852	471.902	104.152	16.9686	25.4853	11.2921	55.7397	944.396	31.4326	125.085	4.1764	5.14761	5.16364	3.06836	3.9416	0.215303	10.4958	1.97271	0.540737	0.079917
ECU	173.167	291.899	24.2754	1.98001	76.7872	1012.22	22.9594	6.38271	630.681	37.6577	481.556	104.215	43.9752	19.6524	11.5485	1455.45	11.1915	185.187	1.70511	6.5362	339.828	160.346	140.797	22.5354	35.3188	32.927	36.6438	392.053	4462.35	856.167	192.49	154.045	176.135	95.0884	109.182	165.606	652.651	43.5645	82.408	64.5727	29.1516	26.0726	76.7993	16.0564	2.64371	0.721814	4.5883	1.38054	0.233136
SLV	23.9743	22.0516	0.480616	0.586405	16.2605	329.744	4.44457	0.360049	67.0186	13.347	87.8566	4.29768	0.623438	3.31241	3.32479	44.0736	0.430085	0.719469	0.302742	0.169637	13.5513	5.83121	5.3611	1.97033	4.60164	1.17763	4.18855	100.515	1514.52	63.8875	19.8986	90.0793	13.1826	4.24724	7.44825	62.5444	115.635	3.93887	16.5969	3.1774	5.48036	3.58146	1.61802	0.966562	0.147099	0.47214	0.411172	0.377846	0.0864742
GRL	0	0	0	0	0	0	0	0	0	0	0	0	0	0	0	0	0	0	0	0	0	0	0	0	0	0	0	0	0	0	0	0	0	0	0	0	0	0	0	0	0	0	0	0	0	0	0	0	0
GTM	53.4487	218.413	3.33013	3.77372	15.0449	891.946	31.5941	3.34059	674.755	85.2652	323.779	20.154	9.74046	15.1546	18.9966	314.414	13.3697	6.4198	1.86549	1.31986	186.011	43.4521	31.3574	5.51302	131.037	6.51248	4.86835	426.175	11979.6	807.039	123.756	754.465	723.067	34.4748	533.278	772.183	315.442	53.7451	288.903	20.6656	36.5803	79.4098	27.732	31.1943	1.75042	4.11192	2.7886	11.3856	0.284336
GUY	0.551155	0.920603	0.0553348	0.0391353	0.0903963	4.4106	0.573022	0.0175548	1.80715	2.14356	7.84473	0.542169	0.0320583	0.140297	0.666358	2.51527	0.0236965	0.272229	0.0162059	0.0199703	7.60382	0.382135	2.57903	0.111413	0.568484	0.0521295	0.0368754	31.4619	90.3201	1.95888	1.87942	9.99696	1.57251	1.23926	0.432274	2.32667	0.887193	0.529524	0.747814	0.334872	0.709717	0.288646	0.202548	0.144479	0.0178105	0.0156542	0.0175052	0.0453997	0.0106458
HTI	2.22125	5.75785	0.135755	0.0533785	0.190526	17.3774	1.43147	0.0553053	5.85876	0.432674	16.0452	0.982854	0.113978	0.555808	0.598979	20.8483	0.0821787	0.229668	0.0562166	0.040327	11.8565	1.42112	0.49538	0.141882	0.885631	0.178271	0.124018	6.5381	208.263	5.89448	5.37192	3.69462	1.68258	2.26681	0.955369	5.2337	4.46881	0.976096	3.39687	0.891786	1.26969	0.559932	0.49094	0.29442	0.0596308	0.0521077	0.0520367	0.0982816	0.0443304
HND	47.9252	256.042	7.50082	2.89017	31.166	1209.19	55.2547	1.2563	469.079	122.713	462.684	41.7008	5.9712	12.0794	325.635	488.245	1.7455	4.57176	2.24544	1.0522	457.54	49.7721	43.5962	17.2009	161.408	11.0459	33.8662	659.318	10181.9	1165.33	83.7897	299.5	219.869	46.5111	27.7392	283.823	189.626	36.0212	162.067	13.3734	31.04	44.968	8.30246	4.84911	0.594437	1.13608	2.50066	9.57441	1.95702
JAM	1.29112	1.6243	0.0547513	0.316415	0.199932	10.8525	0.845651	0.0460903	3.31509	0.603078	8.26412	0.451523	0.0773237	0.265591	1.05336	4.7277	0.0399043	0.108832	0.0568846	0.0478722	6.10232	0.864671	4.47117	0.0960966	4.14789	0.09897	0.0723959	87.4308	155.41	28.6312	3.78886	16.7284	1.08555	0.819535	0.837235	13.233	1.79441	0.962161	2.02403	0.449033	0.551258	9.93193	0.277168	1.49968	0.0202965	0.0216028	0.0332863	0.0569715	0.0120029
ANT	0	0	0	0	0	0	0	0	0	0	0	0	0	0	0	0	0	0	0	0	0	0	0	0	0	0	0	0	0	0	0	0	0	0	0	0	0	0	0	0	0	0	0	0	0	0	0	0	0
NIC	190.061	144.489	3.17599	3.05583	57.4419	1249.34	38.4541	1.50336	410.161	74.6714	421.301	24.5876	3.1817	11.4115	137.752	199.941	4.66809	7.17266	1.70749	0.953742	242.486	29.6951	27.6548	9.84463	64.1575	5.64269	4.45426	783.18	7285.06	222.476	83.8418	233.764	37.6363	28.4285	23.6081	1032.94	841.768	41.1498	194.65	16.5207	28.9551	18.4015	10.6126	8.35471	0.892928	1.62834	2.22342	12.3412	0.551987
PAN	84.4899	227.451	5.32625	0.634255	67.4783	598.092	17.7634	4.28055	453.905	79.7948	99.9661	82.5961	2.45243	8.32392	8.72762	423.712	1.16972	7.40377	0.586279	1.35903	62.2918	38.4055	95.9322	3.5499	178.817	1.37387	29.9587	76.3597	2687.96	706.588	80.7008	137.147	51.9086	26.1734	99.3044	153.439	32.0372	9.23979	95.9426	8.62438	8.96198	38.1844	19.1006	3.01942	0.25996	168.801	0.984494	4.66246	0.131352
PRY	141.753	172.796	43.8274	5.54886	26.3314	1690.94	103.264	3.55298	1014.9	43.7772	1001.69	118.006	41.4018	68.9943	130.608	1304.93	7.54377	29.668	5.13562	20.1377	853.675	259.517	208.123	183.52	80.3215	270.139	12.2466	465.981	8079.07	751.041	379.359	188.206	122.677	12971.4	201.257	282.001	536.336	92.1318	886.586	87.7965	121.322	64.9876	42.948	90.4015	7.27294	8.03028	14.8152	58.1618	2.39964
PER	30.8986	71.4237	3.87554	2.40871	18.6187	684.018	37.7946	1.20788	562.048	17.2679	428.666	23.6615	9.13498	25.4135	21.3487	385.126	13.9521	11.1092	1.18149	0.946138	186.252	68.56	32.5197	13.6963	48.6219	3.48013	60.9582	440.077	3726.11	778.805	506.329	336.514	311.934	155.874	55.649	171.229	72.1306	152.049	68.2268	11.9197	45.7213	138.986	493.086	24.6015	0.868336	0.843091	0.721363	7.0998	0.193281
SUR	7.91006	18.3511	1.13751	0.630196	2.75863	81.9684	13.0495	0.325154	32.5357	4.97252	174.249	11.6531	1.14901	2.34219	5.93635	37.271	0.652963	2.50085	0.526154	0.98574	124.791	8.04162	14.0988	1.64154	19.9846	1.11007	0.893606	116.791	323.197	22.2432	38.7935	25.0168	8.37317	17.1967	5.29288	25.6446	10.8361	5.04749	10.2844	5.8755	6.41137	95.1068	3.67621	1.63301	0.16371	0.172543	0.439951	0.437823	0.0955775
TTO	3.44028	7.49825	0.377487	0.46826	0.255757	33.328	1.25148	0.0444063	7.52189	2.1666	40.2853	1.62252	0.0983952	0.482857	2.45537	10.1876	0.0669834	0.259266	0.0460228	0.0522374	14.2058	1.17972	3.12155	0.157732	1.17428	0.161743	0.119243	42.6139	375.026	11.0052	4.77323	28.1485	2.54672	11.6993	8.5471	12.4717	4.87353	2.02421	2.70092	0.870603	1.30119	3.55162	2.44762	1.5535	0.0435206	0.064749	0.0509593	0.338685	0.0237359
URY	8.137	15.8876	0.610979	0.663798	3.11873	88.1247	10.834	0.458091	429.481	4.67749	70.2688	7.44607	1.04215	2.95654	5.72204	68.7078	1.58812	27.4411	0.510878	0.361852	51.1461	8.42342	18.7083	1.1646	21.926	1.88349	1.19267	83.0508	287.548	41.7904	71.8445	33.1174	14.9918	323.285	19.9777	65.3362	17.2534	8.80723	20.7887	9.61191	7.94762	169.99	3.70641	7.57318	0.361879	0.317367	0.30374	1.16505	0.218965
VEN	34.118	86.9889	2.21771	1.10215	4.96403	419.177	27.9719	0.762862	731.052	9.69336	357.409	35.7599	4.27926	8.07055	34.1093	267.749	1.19782	3.99986	0.919055	0.714963	191.556	21.4689	518.227	6.69164	176.878	3.84759	2.20159	435.478	5533.33	278.159	267.702	431.587	66.232	693.731	30.8476	374.062	51.0301	27.3587	59.6141	14.4671	29.1153	19.9441	13.1713	10.8728	0.818507	0.788989	1.5472	2.15636	0.471987
ALB	7.71757	3.22349	0.985418	0.511568	2.26296	62.6683	4.49721	1.64474	6.18694	1.12407	23.1997	56.3435	0.8297	2.87112	0.833056	150.151	1.76669	0.409549	1.11233	0.151235	4.28068	2.18426	1.07534	2.51328	1.4855	1.10073	1.24997	9.33542	44.5746	8.25014	3.21308	2.3574	1.25087	1.52857	1.38845	1.69422	27.2675	1.36313	5.99613	7.21805	1.58802	0.9217	0.878314	0.340282	0.19104	0.182754	0.168573	0.138281	0.0935062
AND	0.00976936	0.0026165	0.000747841	0.000570351	0.00594025	0.0191365	0.00340101	0.00260632	0.10117	0.00211771	0.0274231	0.00313905	0.0016064	0.00802012	0.00190152	0.0259044	0.00871489	0.000885444	0.0124228	0.000278143	0.00340804	0.00607913	0.00354138	0.00601772	0.00370324	0.00585456	0.0138978	0.0106099	0.0179261	0.00446077	0.0106368	0.00183901	0.00293104	0.00246574	0.00539583	0.00345994	0.0348633	0.00222542	0.00198235	0.0173025	0.00448204	0.00247731	0.00297482	0.000550983	0.00017308	0.000176129	0.000257188	0.000221106	0.00015617
BLR	129.177	454.814	15.2475	12.7715	109.504	1595	159.237	85.6193	164.651	123.94	360.742	60.2297	22.9456	627.785	37.9516	488.675	307.531	43.9038	153.152	2.33316	519.708	734.758	31.2594	46.0208	100.039	22.6056	47.4448	437.408	637.154	155.769	397.408	49.1619	59.522	35.3034	84.1477	51.2822	5878.53	31.1101	74.7274	102.565	93.9026	48.6921	19.3941	10.2192	2.84931	6.23067	17.7852	3.87275	0.706567
BIH	26.6301	7.95992	0.392169	0.242015	1.60025	84.6472	1.11252	0.475183	5.30126	0.928382	27.0556	1.64629	39.2344	6.75757	0.78706	77.3812	0.595026	0.507112	0.345554	0.0734552	7.26638	5.90496	1.637	1.35815	2.5078	14.6103	0.999298	10.4942	18.8279	2.85948	2.91797	1.18476	0.793674	0.725202	0.80538	0.839401	12.6283	1.57384	6.00802	2.48222	1.0284	0.922739	0.613813	0.286989	0.0351094	0.0490297	0.165374	0.0579666	0.0289563
ISL	0	0	0	0	0	0	0	0	0	0	0	0	0	0	0	0	0	0	0	0	0	0	0	0	0	0	0	0	0	0	0	0	0	0	0	0	0	0	0	0	0	0	0	0	0	0	0	0	0
LIE	0.00315689	0.00150707	0.00090983	0.000578613	0.00113484	0.00782384	0.00213054	0.00473298	0.00567584	0.00148909	0.00498641	0.00228845	0.000832123	0.00353598	0.00133238	0.00699307	0.00494916	0.000701961	0.00410575	0.000305905	0.00257442	0.00454471	0.0011403	0.00389257	0.00209283	0.0021291	0.00309003	0.0061915	0.0143199	0.00528989	0.00666437	0.00231498	0.00159835	0.00232593	0.00362326	0.00384578	0.103357	0.00219844	0.00133178	0.00457864	0.00416967	0.0013352	0.00157732	0.000516845	0.000216604	0.000236148	0.00039032	0.000252579	0.000158046
MCO	0	0	0	0	0	0	0	0	0	0	0	0	0	0	0	0	0	0	0	0	0	0	0	0	0	0	0	0	0	0	0	0	0	0	0	0	0	0	0	0	0	0	0	0	0	0	0	0	0
MNE	1.38929	1.00156	0.377871	0.214976	0.979452	4.16495	1.10968	3.20404	3.46922	0.648321	2.57838	1.56483	0.917899	2.61532	0.69858	3.60313	3.82507	0.440698	1.94465	0.0953399	1.26779	1.9797	0.576727	1.96626	1.00844	1.42627	1.98794	3.54194	6.17381	1.86697	3.75389	0.609961	0.771722	0.810436	1.71531	1.07865	44.6227	1.03313	0.638337	2.26897	2.30714	0.563975	0.666845	0.234371	0.186599	0.207454	0.317033	0.211493	0.201249
MDA	1.79444	1.21549	0.3557	0.188588	1.06177	6.80083	0.696772	0.521584	1.88712	0.47485	2.32869	0.822201	1.16302	2.07414	0.770644	4.54952	1.47095	0.69851	0.645127	0.11369	1.20239	1.60482	0.66716	4.58971	0.629991	0.720389	0.95231	3.07935	5.81502	1.34297	1.46282	0.532626	0.625409	0.550384	0.849329	0.615528	13.3484	1.12195	0.46915	1.35582	1.05942	0.349674	0.442059	0.172766	0.141664	0.155326	0.15437	0.158567	0.119774
SMR	0	0	0	0	0	0	0	0	0	0	0	0	0	0	0	0	0	0	0	0	0	0	0	0	0	0	0	0	0	0	0	0	0	0	0	0	0	0	0	0	0	0	0	0	0	0	0	0	0
SRB	0.939445	0.785221	0.255383	0.209545	0.81659	3.15271	0.682127	1.39889	2.15133	0.39957	1.7886	1.01108	0.809012	1.95362	0.544796	2.78038	2.20268	0.409192	1.19629	0.0585381	1.00799	1.79673	0.455508	1.27956	0.62575	0.800411	1.35995	2.55703	4.71106	1.38452	2.60321	0.498157	0.545041	0.558753	1.0281	0.607359	25.8553	0.732839	0.4546	1.57519	1.65695	0.387892	0.448262	0.161661	0.12189	0.13106	0.186979	0.134441	0.139986
MKD	10.4292	8.10442	15.6561	1.54066	4.18094	88.4796	3.69543	3.90261	12.9822	2.02973	22.7765	28.5229	30.5184	11.1916	2.35481	125.087	6.13057	1.47274	5.95393	0.380039	11.0516	9.73561	2.52882	11.9636	5.02965	39.1082	18.4898	21.0098	41.6864	13.4766	14.3229	4.49283	2.48966	2.58759	5.01916	2.85909	62.0638	5.57507	10.2298	44.7099	4.78358	2.25667	1.68219	0.724138	0.353914	0.415565	0.489233	0.417082	0.372521
UKR	349.215	170.651	96.7711	16.8482	221.281	1694.36	135.191	137.862	307.443	60.0643	376.447	69.5783	23.3173	814.748	30.0513	743.505	368.254	14.3743	123.292	2.57413	316.853	678.158	34.9303	85.3457	74.685	26.8994	146.944	311.632	749.187	124.755	234.881	76.951	73.1394	34.454	146.307	48.4143	5955.92	30.7108	129.995	295.204	99.536	45.9437	27.4562	15.9375	2.17582	22.2302	30.1398	5.42599	1.00666
DZA	1.00189	1.68452	0.0456291	0.0427285	0.901908	5.78284	0.34093	0.0110814	9.01661	0.136854	17.6217	1.62696	0.0626436	0.126919	0.28951	8.31002	0.0138008	0.228122	0.0120722	0.026098	4.07626	0.294252	0.549733	0.0790595	1.18228	0.234411	0.0575272	5.24809	23.3677	2.93099	2.01993	4.93937	0.714327	2.4506	0.522098	1.17566	0.501623	0.429388	1.75738	1.27307	0.971965	0.222871	0.16364	0.0917951	0.00393879	0.00678674	0.00699201	0.0301369	0.00176745
AGO	58.4356	118.359	4.74362	1.66314	6.93632	480.54	38.7547	1.86595	433.539	11.1731	400.345	21.2924	5.61704	15.1761	16.8272	187.737	2.39752	13.25	1.94757	1.34415	96.8557	40.7202	248.702	4.83019	32.6262	5.41577	3.485	189.169	1330.07	157.446	3027.95	121.794	1187.86	80.2576	52.5801	75.5129	119.593	53.07	29.0903	21.282	135.165	21.7953	25.608	183.495	1.01053	0.80122	18.6585	38.0097	0.712671
BEN	7.81494	21.582	0.601444	0.189659	1.40287	53.9506	9.01294	0.215447	43.8018	1.26084	124.682	2.87077	0.666242	2.84855	2.93453	154.636	0.309108	3.79547	0.238995	0.328077	47.9614	6.40322	5.38209	1.51409	10.618	0.861667	0.476915	56.1266	85.9187	11.6238	12.4747	6.24702	2.99137	6.05328	145.739	9.34853	11.3697	3.86379	5.21005	3.26564	2.51614	1.52069	9.09386	5.55673	0.284196	0.119595	0.121269	3.63569	0.100641
BWA	0.0887675	0.107983	0.00656195	0.00437701	0.0108657	0.833539	0.0659735	0.0032847	0.169882	0.0200357	0.694929	0.283602	0.00679678	0.0324089	0.184023	0.63766	0.00371355	0.0125308	0.00281118	0.00244292	0.224613	0.0869766	0.0944212	0.0088916	0.0615415	0.00903175	0.00528174	4.20805	12.5669	3.70226	0.212745	0.183133	0.0628097	0.0530743	0.463207	0.196352	0.109196	0.105924	0.275948	0.0421452	0.0452942	1.01737	0.0819564	1.53856	0.00193582	0.00202939	0.00194716	0.00509569	0.00144563
BFA	0.122487	0.0850918	0.00739042	0.00254058	0.0208552	0.501705	0.0849455	0.0075762	0.319689	0.0174724	2.3381	0.0419597	0.0117926	0.0343156	0.0486115	0.667815	0.00493399	0.120605	0.00357048	0.00264257	0.187419	0.11412	0.0517788	0.0137062	0.0693168	0.0120828	0.012328	0.786789	1.27784	0.503078	0.138907	0.0890587	0.0468576	0.0380365	0.167204	0.144775	0.162907	0.0496085	0.0920192	0.0673667	0.025745	0.024036	0.0829316	0.0259371	0.00196272	0.00173909	0.00225941	0.00509965	0.00151001
BDI	4.84949	12.3155	0.303486	0.172391	0.896003	66.4247	5.02839	0.140496	12.236	1.58583	53.0385	34.0709	0.246027	3.788	1.34886	13.4598	0.591634	0.636941	0.158841	0.193933	45.4963	11.6138	1.3593	6.12432	3.34326	0.644768	0.294154	31.4525	37.2604	7.21729	4.79623	1.83648	1.39478	1.16137	4.0267	4.84883	12.7693	1.98412	11.1966	1.84926	2.21302	1.76844	1.35766	1.25085	0.217358	0.0843165	0.0785264	4.13778	0.0558656
CMR	64.6346	294.66	7.78833	1.63731	34.4739	448.721	33.8679	8.33753	350.004	10.1808	993.163	34.3816	30.8836	21.1437	42.4238	1305.55	9.19824	16.3034	2.35974	1.05657	336.103	65.6192	99.4267	11.4822	21.1873	17.0275	12.2628	511.729	278.125	49.8681	114.567	60.1071	29.9912	13.1555	28.8032	32.1171	107.89	13.2353	35.7232	29.1682	56.227	11.4175	29.7981	28.6168	0.358937	0.646898	0.674539	3.00761	0.219699
CPV	0	0	0	0	0	0	0	0	0	0	0	0	0	0	0	0	0	0	0	0	0	0	0	0	0	0	0	0	0	0	0	0	0	0	0	0	0	0	0	0	0	0	0	0	0	0	0	0	0
CAF	59.4086	98.1739	3.78982	5.01477	14.3744	167.758	46.9724	2.1743	177.507	10.0157	326.124	18.4316	8.23341	28.7252	17.081	196.672	2.73969	7.91785	2.78647	1.5839	29.9571	65.816	38.5547	5.49141	30.7265	12.8382	4.80235	57.8939	586.444	71.7171	63.1852	50.1245	18.0463	19.538	47.8421	100.427	106.168	26.9758	18.9063	24.3247	29.3887	10.2624	36.9742	9.25482	1.37683	1.16244	1.18929	1.78221	1.16891
TCD	2.26703	0.814475	0.116493	0.0435076	0.922884	4.91116	2.01905	0.0737677	3.39657	0.282487	5.77494	0.458697	0.175597	0.750503	0.492022	4.16892	0.0916897	0.223072	0.0719934	0.047072	0.708069	2.20935	1.93904	0.137896	1.03184	0.243276	0.111885	1.5086	13.7657	1.87836	2.15997	0.663496	0.493402	0.695123	1.53089	3.13742	3.97382	0.665894	0.331034	0.767986	0.561884	0.291407	0.749118	0.218189	0.045441	0.0365736	0.0379171	5.96116	0.0371035
COG	19.0222	34.2103	1.19227	0.739312	15.7397	152.268	10.9007	0.345602	124.701	3.06162	226.115	20.1439	1.21805	4.1178	10.6922	223.64	0.53033	2.41326	0.381345	0.556486	86.4142	15.128	112.541	2.27053	8.59548	1.67986	2.63906	63.8894	588.941	111.013	135.083	15.2029	160.708	25.0321	70.9867	22.4347	77.9637	10.3116	14.7381	19.2913	98.8232	16.4262	5.68498	2.90027	0.195983	0.240391	0.270057	0.72919	0.113488
CIV	565.238	1717.93	54.8907	15.8606	517.151	2029.71	116.948	108.909	2663.15	253.695	12205.6	847.942	521.006	154.694	126.384	5841.12	98.7021	103.164	8.20237	8.16682	2908.11	1174.22	524.944	132.562	119.308	150.991	134.037	2296.82	3999.16	395.323	916.12	402.445	147.517	162.917	4213	136.606	1771.06	300.835	581.53	103.968	62.0009	135.137	191.717	94.2541	1.73241	3.81113	5.51728	9.09716	0.794153
COD	75.9488	741.518	5.19343	7.48517	10.3482	394.833	51.2701	2.34213	154.491	501.729	479.726	43.1647	21.3956	32.0175	25.9063	854.54	3.0928	272.661	2.45875	2.08235	576.221	69.0701	46.4702	10.1921	49.5213	17.9382	5.14166	232.55	732.026	270.423	119.657	30.8754	28.9405	26.8157	41.4954	83.5904	126.776	29.7122	71.0167	32.6753	22.123	21.0169	24.7417	48.2765	1.06486	1.87322	1.12656	1.80324	0.854558
DJI	0	0	0	0	0	0	0	0	0	0	0	0	0	0	0	0	0	0	0	0	0	0	0	0	0	0	0	0	0	0	0	0	0	0	0	0	0	0	0	0	0	0	0	0	0	0	0	0	0
DOM	7.56603	35.3251	0.304918	0.487536	2.98667	88.0677	3.3517	0.150251	33.4466	5.70721	61.8115	2.35383	0.386257	1.31563	1.69013	84.7068	0.18014	0.829154	0.152318	0.165762	46.3128	3.50688	2.1343	0.573697	4.76184	0.530607	0.625074	119.913	850.684	36.0035	7.23318	42.4162	9.75161	5.31146	2.44932	28.4689	5.83498	4.41543	19.3243	1.8675	3.64629	1.82058	1.37593	0.867491	0.0742495	3.54648	0.0756781	0.167741	0.0491748
ERI	0.00344229	0.00203906	0.000201096	9.37E-05	0.000279307	0.0107594	0.00243619	0.000127697	0.00529029	0.000524085	0.010216	0.00571071	0.000190194	0.00122086	0.00110496	0.00755019	0.000147744	0.000424649	0.000121772	7.41E-05	0.00333049	0.00290755	0.00046595	0.000249477	0.0017075	0.000322246	0.000220604	0.00470583	0.0230457	0.00287769	0.0034249	0.00120003	0.000973611	0.00101513	0.00213003	0.0047476	0.00629706	0.00161714	0.000579225	0.00120696	0.000869136	0.000565115	0.00129665	0.000694584	7.04E-05	7.01E-05	6.68E-05	8.94E-05	6.26E-05
ETH	46.7712	95.2053	12.1476	3.9049	17.9306	513.32	44.151	3.6401	208.451	26.5117	305.244	69.2294	10.9887	24.8368	75.6196	402.62	5.27354	13.1645	3.55643	5.73916	211.306	72.5794	36.5033	28.7108	42.354	8.11583	31.4462	306.141	741.405	636.041	104.561	98.7602	41.4143	88.7864	204.344	86.5893	162.447	73.8718	82.5236	58.3874	36.3578	59.7123	102.735	29.8858	2.36834	2.04193	1.98411	4.96085	1.69217
GAB	11.1849	21.3942	1.28025	1.25782	2.11952	64.001	7.02742	0.290788	53.8136	2.75112	306.153	17.631	6.50038	3.014	13.2927	146.873	0.424339	1.81081	0.284462	0.318667	88.8197	12.8069	25.3128	1.73974	6.74639	1.30032	0.86351	43.7361	319.396	43.7249	124.309	9.38447	57.6669	5.99685	26.6535	14.7078	9.95678	6.19394	9.88734	17.4576	11.9082	6.00283	60.1002	6.95809	0.140948	0.167072	0.201058	0.528168	0.0878503
GMB	0.0127659	0.0361776	0.00559253	0.000360278	0.00131311	0.0596362	0.00947781	0.000443172	0.0269754	0.00223509	0.113548	0.00372128	0.000787177	0.00446701	0.0104709	0.0289934	0.000606955	0.00180347	0.000471868	0.000315486	0.0166884	0.00986424	0.00232828	0.00681165	0.00830538	0.00130096	0.000828202	0.267053	0.0985593	0.0867063	0.214485	0.0053101	0.0630604	0.00377596	0.0393214	0.0242864	0.0192268	0.00479611	0.00304726	0.00831235	0.00548396	0.00246093	0.00384954	0.0111273	0.000257593	0.000202497	0.000220157	0.000552891	0.000182217
GHA	150.316	247.847	9.61421	4.43957	57.7671	831.259	59.0741	14.3305	981.068	89.3343	1405.99	62.248	36.07	18.8818	147.691	783.854	2.93448	16.525	2.5001	4.74339	702.279	136.228	86.3406	14.3307	112.114	7.85482	31.9784	2701.19	1871.04	1569.05	243.076	138.906	55.2564	29.6921	292.27	71.6906	112.286	115.932	302.736	87.3562	44.805	79.0782	35.1079	31.5215	1.27113	1.13542	1.06557	5.6977	0.436068
GIN	24.5016	97.2035	1.8491	0.611537	14.4516	77.377	17.9258	0.642442	97.197	3.36952	235.35	10.7725	1.83117	39.5813	96.751	76.1078	0.983642	1.6618	0.879938	1.21177	31.6382	22.8506	9.88404	3.62113	15.5636	1.92124	1.35048	35.8306	190.191	150.957	20.8673	20.3702	61.4687	5.67727	50.1365	17.7098	82.3109	5.42241	7.90876	7.89946	5.44283	6.43984	7.02773	2.03915	0.280181	0.322383	34.1427	0.59179	0.19095
KEN	40.3758	102.281	7.62779	2.31454	15.6107	516.183	32.1012	0.80943	89.9598	13.1802	236.715	34.04	2.07776	7.83475	41.9493	227.144	1.1856	30.1127	0.728419	2.67448	472.731	68.1506	24.5176	5.21515	56.565	3.28565	5.81409	1481.37	430.037	213.288	156.052	49.6716	25.2388	16.2608	630.351	25.136	161.386	58.658	54.433	128.567	12.9398	24.6711	31.3415	29.4829	131.234	1.14848	4.2585	3.96856	0.217936
LSO	0.00236534	0.000909066	0.00014872	4.42E-05	0.000160649	0.0042705	0.00167118	7.96E-05	0.00295027	0.000327024	0.00525273	0.000343012	6.62E-05	0.000736517	0.000565728	0.00361442	0.00012036	0.000160175	8.77E-05	4.18E-05	0.000479438	0.00151441	0.000186568	0.000237756	0.0010131	0.000189057	0.000143061	0.0011369	0.0135584	0.00100742	0.00192729	0.00131102	0.000373166	0.000568179	0.000720439	0.00310748	0.0025986	0.000683661	0.000184273	0.000666505	0.000221928	0.000231804	0.000386404	0.00913986	3.62E-05	2.97E-05	3.14E-05	4.64E-05	2.92E-05
LBR	44.4595	42.7206	3.18177	1.53322	10.4464	521.455	33.9027	1.94228	109.843	13.3755	163.969	84.8652	15.096	13.8581	15.8498	329.431	2.18883	5.94653	1.67264	1.89214	42.3365	46.7461	15.075	5.22666	24.6555	4.35743	3.55497	104.403	307.829	56.1674	95.5166	22.4056	32.1086	15.1991	226.803	50.653	61.9368	22.3389	38.8524	25.9835	12.8645	831.267	26.2129	9.5	0.962891	1.1362	0.88052	150.781	0.785234
LBY	0.0211558	0.00799139	0.000619534	0.00421317	0.00231171	0.150196	0.0026526	0.000152851	0.106561	0.00124197	0.0384008	0.0347435	0.00415745	0.00176267	0.00160862	0.318482	0.000191621	0.000863193	0.0001321	0.00347292	0.0358563	0.00415034	0.0127592	0.00148799	0.00802729	0.00170354	0.000704701	0.0568945	0.0492823	0.0213881	0.00928363	0.00282332	0.00443116	0.00318417	0.00782995	0.00479108	0.00497884	0.00235503	0.0655036	0.057278	0.00199723	0.00196212	0.00324413	0.000670623	5.01E-05	8.95E-05	0.00234523	0.000173469	2.39E-05
MDG	58.8207	62.7037	5.77077	2.1474	14.8784	567.413	33.7829	65.5919	148.25	18.6636	1516.14	25.3339	5.79315	9.11612	20.3127	221.834	2.07229	5.58395	3.58036	0.831499	238.366	32.1509	24.7036	6.40832	32.7668	4.54577	10.6638	296.812	1481.81	224.819	224.922	76.2002	35.5057	55.7855	69.5036	46.2691	58.4545	46.6664	31.3819	13.5077	37.207	14.0985	238.905	21.7199	0.379815	0.526925	0.473637	2.67672	0.181778
MWI	3.63462	6.72618	0.857574	0.166846	2.27021	54.3852	5.06073	14.5691	11.4305	2.08717	29.2342	2.86679	0.649545	3.34792	5.27676	12.9165	0.252334	0.928189	0.215111	0.15646	41.8408	9.24302	4.64682	1.31278	6.81105	0.515697	0.882023	129.729	58.4328	25.6543	13.2449	6.76396	1.81799	1.28912	9.6546	4.51377	27.5803	8.21162	4.69281	1.78909	1.9698	1.35435	1.96879	67.2999	0.0840168	0.0708314	0.0717578	0.396908	0.049611
MLI	0.609086	2.0751	0.0420282	0.0152048	0.227653	2.34126	0.734607	0.0462474	2.01436	0.122309	22.0245	0.438022	0.0457687	0.208943	0.327071	4.6437	0.0294235	0.140149	0.0178434	0.0149617	2.80303	0.610003	0.323608	0.0844116	0.341038	0.0657362	0.0887498	1.82077	6.37451	0.880943	1.23615	1.00541	0.540293	0.377672	1.4081	0.787211	1.00232	0.365363	0.339158	0.218641	0.267942	0.232658	0.399151	0.188436	0.0108726	0.00968127	0.012447	0.0207706	0.00834176
MRT	0.0324364	0.02262	0.011199	0.00124494	0.0137356	0.109938	0.0202335	0.00391309	0.561182	0.0117168	0.34185	0.0260674	0.00958998	0.00869975	0.0180503	0.357626	0.360519	0.00316289	0.0689601	0.000801824	0.0609951	0.0240542	0.049144	0.0026961	0.0326648	0.00363107	0.00190237	0.0855723	0.22711	0.617343	0.0862759	0.100059	0.0214905	0.0428945	0.0283321	0.0396182	0.920506	0.0127708	0.03511	0.0126532	0.00942594	0.0150515	0.0130528	0.00411672	0.000479425	0.000527757	0.00058527	0.0016115	0.000334678
MUS	0.297273	0.542	0.0160688	0.0184934	0.0612313	1.6717	0.189348	0.0299859	1.60478	0.126496	10.0146	0.158416	0.0358798	0.0679769	0.384476	1.88925	0.0103608	0.0753867	0.00733929	0.0142649	0.46597	0.202833	0.918172	0.0335596	0.492927	0.0381629	0.025117	19.3864	4.20814	1.91877	2.03936	0.649642	0.454875	0.153285	2.10848	0.492549	0.433954	0.40418	0.731485	0.143769	0.208248	0.140977	0.194589	0.580155	0.00704223	0.00609128	0.00677351	0.0239157	0.00438175
MAR	1.63316	7.35495	0.193838	0.123718	0.886587	24.7575	1.08964	0.134762	49.162	1.34508	89.3383	3.13112	0.358671	0.831724	1.17156	21.6573	0.650214	0.587674	0.0379078	0.178542	20.2997	1.48006	8.62221	0.310221	2.29124	0.256684	0.546179	22.8835	15.6845	26.5686	4.45753	5.92283	1.93243	1.83993	2.88394	0.97581	7.64152	1.92366	4.23607	3.13898	0.493086	1.69024	0.292578	0.477151	0.00897213	0.0502405	0.0694993	0.054293	0.00240963
MOZ	137.189	107.378	7.27707	2.10948	16.1891	2475.36	71.6551	3.49264	361.993	15.0948	312.907	28.5278	6.09625	30.5268	26.1291	252.851	4.42638	7.79381	2.95541	1.84061	135.415	83.6419	269.802	10.7557	50.8297	9.4827	6.18012	236.279	811.57	423.164	192.518	43.5505	66.9246	50.9164	657.745	116.614	179.569	39.1484	37.8666	47.2569	27.0189	16.4894	751.449	1342.16	1.92646	1.49944	1.65307	4.08077	1.19979
NAM	1.78586	0.953194	0.0575533	0.0185888	0.0834486	6.08913	0.577763	0.0148425	50.2751	0.119849	5.65047	0.40481	0.0440353	0.253661	0.145128	5.03732	0.236668	0.181702	0.0883755	0.0162589	0.98755	0.52557	1.39785	0.0530729	0.444682	0.0566187	0.0674709	7.1183	6.30451	4.17538	4.33929	1.1761	0.730276	1.65011	0.300524	0.58377	6.19182	1.72874	0.412169	0.228644	0.190076	0.529196	0.688541	15.3253	0.00630632	0.00899587	0.0195539	0.0289184	0.00405449
NER	0	0	0	0	0	0	0	0	0	0	0	0	0	0	0	0	0	0	0	0	0	0	0	0	0	0	0	0	0	0	0	0	0	0	0	0	0	0	0	0	0	0	0	0	0	0	0	0	0
NGA	84.212	71.2789	1.99903	2.73638	10.848	169.269	16.488	6.62134	269.967	5.64392	363.485	179.586	6.58534	5.76983	19.7064	205.572	0.998494	4.06127	0.878285	1.13086	145.52	23.5538	188.721	2.64048	202.381	1.99693	1.98421	280.68	863.412	384.014	178.531	200.341	58.2816	162.684	152.175	38.7445	28.586	114.734	292.302	20.8733	36.2545	8.86061	267.706	191.455	0.260235	0.409203	0.61246	1.26618	0.138596
RWA	3.71402	9.04817	0.255304	0.145216	0.934329	34.1718	4.51702	0.151937	12.7381	0.811548	15.067	2.50776	0.220689	2.19582	1.51036	13.2646	0.175941	0.865098	0.128985	0.404412	64.4668	2.93722	2.62468	5.06651	2.5752	0.357261	0.275083	12.9593	35.3809	3.95468	4.60888	1.36743	1.22521	2.21861	4.8491	4.32853	6.03111	2.69328	3.03947	1.77459	1.10346	0.932566	1.32062	2.2042	0.102606	0.0743556	0.075268	0.130276	0.0618056
STP	0	0	0	0	0	0	0	0	0	0	0	0	0	0	0	0	0	0	0	0	0	0	0	0	0	0	0	0	0	0	0	0	0	0	0	0	0	0	0	0	0	0	0	0	0	0	0	0	0
SEN	0.0913824	0.445315	0.00658784	0.00321729	0.0199366	0.715594	0.0696325	0.00243963	1.46369	0.0243525	2.96059	0.293315	0.00679997	0.0271042	0.0360241	1.68327	0.0118163	0.0261514	0.00321786	0.00489714	0.520322	0.0695376	0.156459	0.00844303	0.0776829	0.0109949	0.00511856	1.24755	0.914095	0.18421	0.714554	0.0838715	0.071755	0.0315444	0.693349	0.305604	0.130256	0.0332762	0.188934	0.0331938	0.0197208	0.024298	0.0269646	0.0169863	0.00128665	0.00276332	0.00200896	0.0037394	0.000774467
SYC	0	0	0	0	0	0	0	0	0	0	0	0	0	0	0	0	0	0	0	0	0	0	0	0	0	0	0	0	0	0	0	0	0	0	0	0	0	0	0	0	0	0	0	0	0	0	0	0	0
SLE	23.0044	14.5086	1.90377	1.01598	42.6766	54.89	11.8148	2.7014	29.5215	2.75501	123.258	411.89	27.131	9.99873	9.23427	46.7426	0.810592	1.53576	0.608551	0.603032	8.13631	15.6365	4.60401	1.74034	11.7913	2.17877	5.15079	30.1186	131.068	186.381	18.1956	205.728	13.9906	4.90181	26.9897	23.0795	28.5722	5.99334	4.24216	6.7125	4.65107	3.92787	4.13313	7.38461	0.322008	0.696347	0.376383	0.470765	0.232671
SOM	0.597697	0.283447	0.033801	0.0148686	0.0481181	1.48107	0.511499	0.0224875	1.04225	0.0939769	1.90797	0.169753	0.0746166	0.183	0.225364	1.2723	0.0244556	0.0677742	0.0198898	0.0960514	0.318313	0.464934	0.104415	0.0471544	0.335003	0.0538493	0.0402044	1.03589	4.952	1.11936	0.918732	0.300129	0.454387	0.2226	1.40119	0.813911	0.91961	0.325044	0.218445	0.38979	0.196101	0.27891	0.332063	0.109218	0.0219748	0.0119938	0.0127665	0.0227092	0.00969018
SDS	0	0	0	0	0	0	0	0	0	0	0	0	0	0	0	0	0	0	0	0	0	0	0	0	0	0	0	0	0	0	0	0	0	0	0	0	0	0	0	0	0	0	0	0	0	0	0	0	0
SUD	0	0	0	0	0	0	0	0	0	0	0	0	0	0	0	0	0	0	0	0	0	0	0	0	0	0	0	0	0	0	0	0	0	0	0	0	0	0	0	0	0	0	0	0	0	0	0	0	0
SWZ	19.5669	16.2675	1.02766	0.810934	2.79159	48.816	8.13875	0.641711	174.041	13.9346	117.593	19.5057	1.62489	4.93139	9.4318	148.627	0.678245	3.92763	0.520236	1.54503	28.1795	8.53501	16.2944	2.38604	8.68831	1.45151	1.57359	78.645	523.694	587.13	42.5284	15.7161	101.877	10.7994	49.9744	65.9461	14.2364	22.5053	6.48965	8.71202	25.0398	5.12503	169.324	60.3557	3.72337	0.327308	0.347208	3.86452	0.339012
TGO	47.4167	25.0529	0.87732	0.395176	1.35808	39.3324	6.94492	0.25497	49.8796	1.69477	78.9553	5.73488	2.31081	2.48727	5.73036	48.1478	0.439513	2.17638	0.290156	0.280532	39.279	11.8153	9.86438	2.53599	4.46582	4.16984	1.83908	40.4198	67.7372	12.9667	87.0494	7.57467	3.50244	3.21871	10.945	8.76562	14.0542	3.35067	55.691	3.18109	2.71148	2.63649	6.32245	11.3095	0.160244	0.143613	0.151061	42.4453	0.101481
TUN	0.336337	0.860173	0.0336602	0.0474051	0.0834822	3.17716	0.126578	0.00400767	2.22031	0.0670457	9.01283	0.330955	0.0385485	0.0786884	0.127989	7.27028	0.00845279	0.217538	0.00395604	0.0319213	0.982208	0.207152	0.37238	0.0761906	0.258942	0.0297851	0.0340009	1.32186	3.23321	1.01765	0.258945	0.160934	0.122118	0.182295	0.370723	0.131768	0.19118	0.139155	0.454601	0.40685	0.0927482	0.137018	0.119487	0.0647771	0.00231254	0.00338351	0.00441737	0.0260222	0.000743238
UGA	60.6141	135.406	11.7482	4.38788	47.5111	570.542	68.831	27.7145	246.246	12.4501	236.468	42.9697	7.5953	92.0449	19.1586	281.365	2.48039	6.91237	1.54524	1.91166	473.262	144.578	91.9501	41.2108	47.3041	14.6514	11.1693	493.473	474.568	194.181	66.9625	43.7421	21.2037	31.4817	69.71	40.961	140.679	173.2	333.645	22.9098	18.3018	25.5832	19.5854	11.0403	1.23159	0.665579	0.712778	1.63232	0.392638
TZA	176.4	292.104	103.156	9.7721	49.319	2700.55	142.645	2.59844	482.155	66.4488	897.842	560.954	7.24536	113.039	101.951	1161.25	3.95056	119.279	2.67543	3.92104	1159.19	187.318	97.429	26.8611	68.9213	11.4688	11.4616	1758.75	1411.33	2948.49	486.255	132.438	164.175	68.5276	3676.2	106.82	357.773	177.673	105.927	84.3716	56.6297	85.1297	231.105	139.755	2.44933	10.2041	3.4768	20.3261	1.55529
ZMB	54.8719	97.3837	4.11317	40.4744	10.6729	709.824	34.0206	1.96236	188.839	75.677	262.91	19.0684	3.26871	14.2353	43.5435	195.077	1.90932	9.36101	1.37689	1.16853	318.614	42.7775	97.1885	4.78084	28.8415	5.04377	3.30185	737.643	445.094	409.937	300.36	31.525	37.847	20.3166	359.182	58.1306	76.0995	47.0227	30.7036	19.7603	38.6993	22.4688	36.8591	787.904	0.836902	0.968455	0.872764	3.67741	0.543544
ZWE	16.6548	38.067	5.23054	0.516944	5.20558	157.279	14.9263	0.420646	107.254	22.1797	88.7002	14.3802	1.70722	3.26046	15.634	52.4081	0.547527	1.74587	0.552076	0.793879	105.577	14.1393	35.288	2.72765	20.0836	1.29928	1.03834	310.337	161.311	97.5367	50.479	11.6624	14.3769	6.51296	29.3915	14.0902	18.2134	22.9249	15.8406	6.59364	7.84054	11.4108	12.7713	430.792	0.235826	0.399272	0.887398	1.96217	0.180409
BHR	0	0	0	0	0	0	0	0	0	0	0	0	0	0	0	0	0	0	0	0	0	0	0	0	0	0	0	0	0	0	0	0	0	0	0	0	0	0	0	0	0	0	0	0	0	0	0	0	0
EGY	0.0719137	0.124843	0.0183362	0.103654	0.0411875	0.883694	0.0358719	0.00234767	0.419682	0.0317752	0.615357	0.179891	0.00985142	0.0226005	0.0423894	0.759015	0.0037327	0.00769463	0.0136168	0.00706652	0.369159	0.0544607	0.128955	0.0645425	0.0942126	0.0210715	0.011585	0.613842	1.00862	0.199987	0.475962	0.101616	0.161274	0.0731225	0.12074	0.0625573	0.142165	0.0475578	0.0741924	0.155721	0.0258396	0.0852952	0.0891087	0.0681748	0.000583165	0.00148532	0.0023368	0.00250417	0.000144626
IRN	0.269948	0.248856	0.0294563	0.0287333	0.0835684	2.40168	0.182928	0.0152983	1.87211	0.0922446	1.596	0.735254	0.0257679	0.126369	0.108042	2.19411	0.0292261	0.221624	0.0121805	0.0250017	0.527448	0.211618	0.244528	0.122915	0.596289	0.0291965	0.0342812	0.802778	2.74571	2.05451	1.53502	0.34177	0.835127	0.18865	1.71159	0.384623	0.786879	0.24055	0.410312	0.65287	0.240541	0.150188	0.248822	0.54909	0.499458	0.541465	0.835799	0.0656482	0.00284186
IRQ	0.0409408	0.00481258	0.000437733	0.000510123	0.00267429	0.0266391	0.00476631	0.000214371	0.0724253	0.00134357	0.0524713	0.0173408	0.00427505	0.00203637	0.00224025	0.0829578	0.000296906	0.000959232	0.000148074	0.000439124	0.0322538	0.00421238	0.0111909	0.000937792	0.00239907	0.000853507	0.000604251	0.012528	0.187171	0.0265583	0.0434845	0.0792159	0.0152818	0.0145492	0.00649814	0.00960235	0.0107093	0.0109924	0.00273586	0.00417537	0.00653236	0.0018618	0.00374023	0.000842735	0.000107453	0.000113781	0.000115596	0.000250696	5.47E-05
ISR	0.431802	1.14064	0.0707866	0.172506	0.211025	4.70458	0.299129	0.0225629	1.74888	0.366994	3.28975	0.776864	0.0758698	0.243834	0.415227	3.00857	0.0318526	0.0828209	0.0482854	0.0241811	2.16264	0.541546	0.181247	0.313065	0.514663	0.0651587	0.0768448	4.04257	8.32482	0.993926	0.640183	0.99552	0.360914	0.34787	0.492263	0.500678	0.705146	0.503247	1.00224	0.951702	0.148843	0.491023	0.105838	0.300135	0.00278574	0.00909671	0.0114099	0.00994597	0.0011376
JOR	0	0	0	0	0	0	0	0	0	0	0	0	0	0	0	0	0	0	0	0	0	0	0	0	0	0	0	0	0	0	0	0	0	0	0	0	0	0	0	0	0	0	0	0	0	0	0	0	0
KWT	0	0	0	0	0	0	0	0	0	0	0	0	0	0	0	0	0	0	0	0	0	0	0	0	0	0	0	0	0	0	0	0	0	0	0	0	0	0	0	0	0	0	0	0	0	0	0	0	0
LBN	0.413284	0.485615	0.0553891	0.225147	0.067861	2.04315	0.382617	0.0236556	1.08627	0.103002	2.1416	1.06886	0.0277109	0.156342	0.194886	1.47576	0.0215936	0.0668489	0.0122986	0.0363163	0.538422	0.296738	0.149874	0.288772	0.377546	0.0418762	0.0302629	2.20783	5.62655	0.559235	0.443929	0.534064	0.185817	0.608955	0.359601	0.549522	1.20581	0.436905	2.79525	4.92993	0.111789	0.215772	0.203377	0.0863865	0.0084003	0.156422	0.0226899	0.0261859	0.00501207
PSE	0.003746	0.00170277	0.000212292	0.000184059	0.000280273	0.0105885	0.00253338	0.000283015	0.00713883	0.000818761	0.00960489	0.00142069	0.000152495	0.00137288	0.00150013	0.0106591	0.000190185	0.000596518	0.000110723	0.00020514	0.00288282	0.00692454	0.00068106	0.000379135	0.00129244	0.00030738	0.000254836	0.00602812	0.049726	0.00530897	0.00400841	0.00172683	0.0014078	0.00270552	0.00260627	0.00542578	0.00613133	0.00351533	0.000612333	0.00204569	0.00126718	0.000802155	0.00160393	0.000810177	0.000117325	9.99E-05	0.000110881	0.000162966	7.91E-05
OMN	0	0	0	0	0	0	0	0	0	0	0	0	0	0	0	0	0	0	0	0	0	0	0	0	0	0	0	0	0	0	0	0	0	0	0	0	0	0	0	0	0	0	0	0	0	0	0	0	0
QAT	0	0	0	0	0	0	0	0	0	0	0	0	0	0	0	0	0	0	0	0	0	0	0	0	0	0	0	0	0	0	0	0	0	0	0	0	0	0	0	0	0	0	0	0	0	0	0	0	0
SAU	0	0	0	0	0	0	0	0	0	0	0	0	0	0	0	0	0	0	0	0	0	0	0	0	0	0	0	0	0	0	0	0	0	0	0	0	0	0	0	0	0	0	0	0	0	0	0	0	0
SYR	0.19331	0.266279	0.245158	0.140784	0.186549	2.57562	0.157118	0.00576266	0.712726	0.0350564	1.23057	0.631978	0.0378542	0.0612288	0.0575242	1.70217	0.00805937	0.0232238	0.0047981	0.0103537	2.5225	0.100247	0.228267	0.183057	0.109503	0.0151259	0.0192094	0.804727	3.34373	0.452978	0.244442	0.211012	0.271899	0.621072	0.779581	0.431282	0.840532	0.138753	0.110477	1.55389	0.0721681	0.0511552	0.0827935	0.045514	0.0023922	0.114603	0.034059	0.0209957	0.00108634
ARE	0	0	0	0	0	0	0	0	0	0	0	0	0	0	0	0	0	0	0	0	0	0	0	0	0	0	0	0	0	0	0	0	0	0	0	0	0	0	0	0	0	0	0	0	0	0	0	0	0
YEM	0	0	0	0	0	0	0	0	0	0	0	0	0	0	0	0	0	0	0	0	0	0	0	0	0	0	0	0	0	0	0	0	0	0	0	0	0	0	0	0	0	0	0	0	0	0	0	0	0
tot	19344	36408.5	6268.33	1467.13	8720.73	158429	18854	10424.8	76856.9	71814	119368	18732.3	4228.59	12321.2	17471	98540.5	6663.12	3440.49	10025.4	510.611	62735.6	27298.5	22458.3	10086.5	72310.8	3356.52	4698.48	159455	2.14205e+06	244706	301567	305701	62374.4	2.1891e+06	72736.7	185057	243527	71474.4	20832.8	30570.5	48062.9	30935	480111	51192.1	620.536	935.465	2280.27	8562.66	115.54
[truncated: 140 more columns]

## Sheet: 2002
GID	AUT	BEL	BGR	CYP	CZE	DEU	DNK	EST	ESP	FIN	FRA	GRC	HRV	HUN	IRL	ITA	LTU	LUX	LVA	MLT	NLD	POL	PRT	ROU	SWE	SVN	SVK	GBR	USA	JPN	CHN	CAN	KOR	BRA	IND	MEX	RUS	AUS	CHE	TUR	TWN	NOR	IDN	ZAF	AFG	ARM	AZE	BGD	BTN
AUT	4713.44	38.7328	4.26069	2.28148	57.0243	1083.37	25.4508	1.62367	126.798	19.0232	291.85	61.6743	61.6925	112.358	20.0327	1212.55	3.84223	3.89629	2.32556	1.68205	79.8916	96.13	28.8986	33.2241	45.3958	58.8983	23.8428	282.991	492.493	243.075	110.794	66.0777	27.4004	15.9741	20.8038	27.278	64.6679	26.4433	186.117	51.9426	38.164	23.0762	7.47639	6.23486	0.372542	0.834682	1.01516	1.10113	0.304313
BEL	13.449	718.93	0.603658	0.545541	4.49225	198.672	10.8728	0.435973	58.2702	5.87218	309.713	10.5283	1.84827	4.93766	13.8135	83.2572	0.802875	1.23852	0.448242	0.293418	118.38	14.7217	11.0747	2.66026	16.9696	1.40385	1.57169	189.105	143.863	19.7873	35.2787	16.3495	17.4949	6.10466	9.1377	9.23996	12.4997	10.6381	17.9082	8.65377	3.36792	9.31219	2.84843	2.59081	0.0950365	0.23242	0.189877	0.379075	0.0203809
BGR	24.6036	10.9967	2194.4	4.44137	11.0987	125.441	6.40203	0.277239	31.3597	4.34702	77.9384	268.766	4.18246	13.5518	6.23501	195.887	1.21614	0.611001	1.17398	0.534979	21.1224	20.8642	7.57604	29.0041	20.7432	5.69479	3.15545	83.5577	109.15	16.4012	21.1324	10.0924	8.27064	6.26415	8.02727	8.31174	25.1263	6.92721	10.4576	144.022	8.26496	7.50553	3.58271	0.954026	1.53361	3.53504	2.51685	0.372533	0.17411
CYP	0.0522955	0.0684832	0.0156669	7.92064	0.0354303	0.206692	0.04482	0.00807417	0.123116	0.0374642	0.116474	0.35697	0.0172767	0.0352519	0.0919355	0.157155	0.00632617	0.0153846	0.00490285	0.00411396	0.0794401	0.0408338	0.035692	0.02171	0.0847792	0.0147598	0.0184917	0.601382	0.262128	0.0816931	0.10473	0.0553846	0.063787	0.0525206	0.0645756	0.0549779	0.103969	0.0561363	0.0595563	0.109734	0.045738	0.0562957	0.0347721	0.0276148	0.00191851	0.0201039	0.00171228	0.00854804	0.000875606
CZE	361.165	30.5098	3.80276	1.09809	3490.47	785.025	20.5231	1.0425	56	10.1586	131.892	36.9912	18.8948	81.7696	9.57543	228.786	4.94185	1.97985	3.13049	0.431686	55.3899	173.869	11.2208	43.018	30.6723	26.9009	122.317	169.422	194.322	47.6725	36.4629	14.9834	11.0869	6.96554	13.0739	9.79173	77.4878	21.5462	36.0697	20.1717	13.171	17.658	5.15331	1.81977	0.388947	0.532946	1.27868	0.816149	0.119528
DEU	318.842	195.368	7.90218	4.51661	105.512	7287.08	130.474	4.29611	318.323	45.5045	854.978	94.7728	24.9648	84.8813	51.2843	595.332	10.2279	13.7886	7.29762	1.83597	327.152	232.592	54.8619	34.6766	125.739	23.9943	30.3431	730.306	962.736	130.251	217.466	72.4257	55.2166	42.594	48.6556	51.6834	144.025	64.6909	253.041	94.9916	73.6437	62.7236	13.9523	14.4198	0.684579	1.0748	1.98745	2.07888	0.100993
DNK	9.19862	7.53345	0.26794	0.224738	3.1086	128.079	519.182	0.405808	15.5799	8.34871	38.9984	3.13045	1.35858	3.33389	6.96867	23.6552	0.773933	0.791235	0.612707	0.0892654	23.0729	13.8058	3.79456	0.90204	61.3959	0.684106	1.03885	69.6806	46.6702	13.2333	14.2277	4.28864	4.17496	1.85445	2.96509	2.5629	5.71262	4.21116	10.9572	2.65384	4.68463	41.463	1.03936	0.74567	0.0488642	0.0507652	0.117415	0.20124	0.0122518
EST	99.8029	110.241	7.01896	7.50225	71.0837	1550.44	589.696	7821.78	201.277	1422.25	492.176	59.4726	19.2076	77.5477	225.508	427.17	88.814	9.00358	152.942	3.06371	286.807	262.18	56.9383	15.8431	1197.83	14.1626	17.1566	1702.42	874.115	185.019	186.996	66.4397	74.8881	29.767	50.2589	39.421	542.59	56.9028	87.2861	127.47	77.4111	765.612	32.3303	10.7385	1.25987	2.47128	7.0658	2.92344	1.00569
ESP	70.8575	127.813	5.67252	7.21861	25.1563	662.835	44.2222	1.95433	19236.7	31.4649	1523.68	117.216	14.0675	24.389	65.8198	740.329	7.66746	10.7714	4.52321	5.41956	180.028	84.5205	1060.1	18.6709	75.5052	11.8139	9.57401	804.946	1130.97	134.518	148.772	69.4875	74.842	66.821	44.8631	153.28	116.399	56.6415	83.5754	99.0167	38.9676	44.8387	17.7043	14.4814	0.576342	1.17324	1.58132	2.81426	0.147417
FIN	985.949	1417.12	55.1998	42.1085	342.116	9892.98	1919.57	230.499	4389.75	49120	6177.41	1030.31	117.141	492.758	833.42	3989.74	131.285	86.6532	138.367	15.684	2476.43	1524.04	639.447	135.147	2638.93	93.7759	222.149	11500.6	11003.2	3712.59	2165.6	809.765	680.753	541.728	553.947	603.899	2449.37	1075.52	994.193	767.825	735.46	1748.83	153.562	134.925	6.5405	10.6034	18.4013	22.6269	1.05325
FRA	156.235	575.264	9.2304	6.85651	61.4355	1754.29	104.285	3.28511	1532.1	53.4304	16631.3	160.48	26.7219	58.3745	114.85	1470.28	7.9328	39.5437	4.76705	4.0536	500.386	170.998	215.601	55.7292	125.949	24.6024	18.6066	1724.4	1761.43	253.518	276.232	137.381	104.523	85.4669	95.9717	82.646	160.068	130.835	379.79	148.591	87.4559	62.7398	27.852	30.8447	1.03701	2.0575	2.53446	4.79627	0.143448
GRC	6.04855	5.99777	11.1958	12.6395	2.80062	41.4335	3.88903	0.295052	13.731	2.39007	20.9077	2189.13	3.5807	4.09781	2.83951	48.8313	0.385106	0.679534	0.367992	1.59801	10.9376	6.6808	4.02116	10.1135	6.54601	1.35345	1.16863	34.5566	44.7573	9.39327	12.4388	7.14367	5.96919	2.21776	4.61842	4.80703	24.4158	7.74402	5.89164	31.5414	2.5733	4.24659	2.05477	1.74955	0.397294	2.89043	0.744244	0.216683	0.0365094
HRV	32.8335	10.1097	1.34715	1.14858	7.67382	90.3408	5.39901	0.435861	22.9081	4.35927	40.3305	10.1425	916.701	25.2104	3.39922	259.034	0.783268	1.41651	0.649683	0.333237	11.3387	11.2329	4.33558	3.87286	9.18985	79.1808	3.866	30.0627	45.7112	8.09796	10.9962	5.56695	4.54855	3.67656	4.59707	4.49093	10.0016	4.52222	10.7967	5.53436	4.91582	5.29153	2.61084	1.78664	0.088594	0.11235	0.68675	0.129606	0.0483909
HUN	297.216	37.0916	10.6656	1.72065	97.3904	775.163	106.695	2.71789	92.4431	18.2853	196.223	62.0363	95.5746	3478.67	12.6428	423.396	9.78029	3.67361	6.49921	0.725942	84.1685	194.422	15.7278	158.109	52.02	44.9933	65.8793	151.809	223.376	38.0888	60.5817	18.0088	16.4395	10.4721	31.016	15.8177	157.176	26.9095	46.1077	69.0462	22.7501	29.6007	6.4135	4.7442	0.308756	0.703808	1.63039	0.868819	0.19786
IRL	14.919	49.4131	1.35446	1.27991	15.8278	180.63	34.4747	1.30884	93.5981	16.7759	174.894	11.7031	3.4139	14.8627	1799.4	120.67	1.19195	5.58614	1.38391	0.874798	86.4996	22.741	12.0995	4.06322	56.3628	2.08911	6.06711	1394.31	335.82	43.4476	37.3884	21.9996	30.6228	10.5414	18.7159	16.9189	32.0401	23.3301	30.2777	18.2993	10.4085	31.8892	7.19916	9.81564	0.527833	0.302771	0.671163	0.91368	0.219981
ITA	54.6529	39.6533	4.12237	3.16897	13.6933	361.903	18.9289	0.923383	160.51	11.333	368.885	85.8188	19.1037	18.8414	14.3132	6275.11	2.28415	3.10204	1.67644	2.32536	55.8486	40.3856	28.3456	25.0709	26.12	18.3209	6.41549	228.127	422.977	55.9399	58.6614	29.6335	26.5926	19.2299	15.7554	24.2923	42.9629	32.9395	69.7476	43.5129	19.2221	13.7328	5.92108	5.02211	0.14347	0.726833	0.746634	0.930796	0.0425382
LTU	56.2921	108.14	4.69879	4.32822	24.7675	989.745	229.627	47.6784	73.4043	65.2454	169.819	17.5197	10.8153	38.3828	23.3036	155.582	4600.13	12.6279	200.379	1.28796	129.288	223.792	21.2512	9.13013	243.835	6.21068	11.2553	562.285	789.718	75.0204	51.088	124.489	21.4946	11.8706	17.7164	19.4237	407.294	18.3511	44.2706	55.0991	21.2615	240.184	8.86875	5.14311	0.712465	2.21787	5.1596	1.50265	0.614959
LUX	0.630108	0.511275	0.0579844	0.0301827	0.258791	7.44792	0.540697	0.024018	2.09803	0.319514	19.0368	0.610484	0.0913216	0.283332	0.488883	2.79909	0.0276763	14.2937	0.0233901	0.018175	10.5817	0.573516	0.49215	0.100342	0.853404	0.0750654	0.0842465	6.57794	5.93068	0.854053	1.30458	0.688831	0.597838	0.303349	0.597828	0.393555	0.470644	0.473809	1.13985	0.39123	0.206965	0.479946	0.172408	0.243054	0.00807985	0.0258356	0.0122102	0.0161741	0.00904584
LVA	161.051	196.445	10.7095	6.8081	80.0619	2415.22	792.263	148.195	348.772	396.859	795.651	96.904	22.9468	85.2857	339.661	479.799	242.404	20.5239	8933.95	3.20054	449.935	346.021	58.3573	20.2044	2063.63	29.8308	46.4299	5902.3	1307.58	386.643	160.744	118.538	57.4148	36.0619	53.97	47.7014	285.042	61.4865	124.857	63.5528	61.5226	376.029	24.3963	16.1297	8.33861	9.0524	5.04344	5.35423	2.80836
MLT	0	0	0	0	0	0	0	0	0	0	0	0	0	0	0	0	0	0	0	0	0	0	0	0	0	0	0	0	0	0	0	0	0	0	0	0	0	0	0	0	0	0	0	0	0	0	0	0	0
NLD	5.69336	20.6329	0.254303	0.205176	1.97951	67.5075	6.55295	0.117679	17.4176	2.83663	57.2028	7.91223	0.975827	2.35631	5.02014	27.7176	0.257536	1.57447	0.193761	0.102692	248.679	7.69205	4.70375	0.931153	8.84717	0.848573	0.718478	57.7556	56.7659	7.44545	14.105	4.25557	3.52719	2.2524	4.25366	3.00396	5.36262	3.65036	6.86001	4.19326	4.64988	5.80336	1.12153	1.00871	0.0348906	0.0749605	0.111055	0.20555	0.00628974
POL	388.573	261.439	30.2202	9.06939	424.417	4212.91	354.529	36.1702	438.203	99.964	1056.5	94.5961	102.062	303.09	77.0217	934.306	204.487	25.4916	82.175	2.93107	473.112	13954.5	62.9205	144.514	448.091	68.1388	178.789	1160.93	875.841	128.788	221.234	117.049	62.4744	39.9555	62.9272	62.264	1010.96	55.4217	196.866	201.034	75.3871	202.495	19.8791	17.1695	1.3383	2.80231	17.5767	3.10338	0.415976
PRT	114.94	154.089	9.10811	7.81887	31.084	1044.4	72.7888	1.92857	2244.85	38.4945	1533.05	98.1842	14.2965	34.8741	68.5158	819.228	4.40289	11.7849	3.34171	5.12552	236.866	83.7492	10718.6	17.8367	105.924	14.9406	10.1598	986.115	1446.76	154.557	192.834	86.0177	57.4049	61.2811	42.074	66.2354	66.1289	276.956	136.45	68.7606	58.7554	57.4268	13.43	20.1808	1.30719	1.01553	1.40571	2.19404	0.246521
ROU	235.253	86.2706	24.8255	12.9166	33.1201	1059.06	45.5148	1.66281	298.779	17.3024	653.118	364.069	30.3102	378.641	22.0647	1389.39	2.77849	8.76754	3.62047	2.07463	171.941	65.8062	31.7113	3707.89	80.0701	42.4652	19.4439	305.565	506.911	80.2223	531.771	47.4281	61.9919	17.6315	37.8253	23.8129	70.9902	26.3981	70.5185	288.961	200.566	51.3103	12.7866	9.25805	0.65777	1.80227	3.35788	3.47121	0.49042
SWE	1402.32	1416.92	58.6228	103.591	536.54	11912.8	5740.78	113.466	4024.06	1913.86	6243.82	1180.13	145.948	536.387	1293.91	5835.35	126.063	124.406	171.763	18.6162	3958.76	1896.33	728.432	208.541	63710.3	132.561	186.694	14964.2	10232.4	3708.81	2350.31	735.839	665.682	374.921	828.957	595.376	1357.68	843.061	1337.08	875.434	787.213	8129.51	341.252	218.738	4.84385	10.245	20.1385	35.9742	1.50817
SVN	21.0616	2.81305	0.606181	0.222368	2.32062	67.3756	2.98981	0.153807	6.45897	1.72395	15.5459	3.45096	31.2858	6.13353	1.21887	60.3362	0.332979	0.416147	0.230473	0.0940109	4.5958	5.49066	1.82429	2.33562	4.37343	299.983	3.14173	15.6927	22.0017	3.32939	6.36624	1.96511	1.58202	1.03201	2.63793	1.38888	5.85919	1.90649	4.94758	2.69204	2.71123	2.22468	1.0386	0.453902	0.273828	0.0607191	0.132251	0.0694255	0.0210206
SVK	207.5	19.8117	3.52663	2.53274	135.193	410.602	28.0002	0.891381	74.8517	10.5717	119.065	43.6867	19.1513	177.861	7.06366	269.643	2.5721	2.0517	1.58115	0.422871	35.6356	129.54	11.1719	39.9015	41.9798	27.4624	1512.26	108.962	107.851	28.6602	23.6615	12.0387	9.272	5.48254	7.80027	7.43264	46.0054	9.99275	25.1529	13.4205	9.53277	16.4727	3.84483	2.10032	0.366076	1.43016	0.738179	0.417907	0.178549
GBR	42.5859	131.625	4.41997	4.53721	21.2687	497.559	60.0288	1.92447	203.017	39.6337	545.277	45.1341	5.95572	17.1335	587.186	275.714	3.70757	8.76277	3.17527	5.91603	185.32	61.1404	48.1271	13.9508	84.1084	5.90127	6.53326	12065.9	1104.55	118.547	106.421	76.5627	69.7593	28.2646	43.0062	33.4553	67.5632	81.3469	90.2878	45.2669	33.2504	58.3864	15.02	19.0859	0.492956	0.964607	2.26622	5.20875	0.140691
USA	574.95	1273.13	34.6922	44.7391	221.298	7452.91	454.377	17.9442	3131.1	296.975	4266.53	562.454	78.4598	197.508	940.738	5119.01	33.4139	94.8879	24.2282	18.0913	2660.35	569.778	512.053	115.22	749.968	69.7413	63.1708	10169.2	1.2518e+06	13418.9	9632.98	28901.6	4863.94	2268.04	1723.66	22629.4	837.092	2663.34	1254.62	959.556	3132.43	473.45	761.977	247.229	9.81363	18.2	30.5654	90.8455	1.80803
JPN	6.11731	12.8449	0.32565	0.674214	2.374	83.1557	4.79434	0.203902	24.0976	5.36945	44.2252	5.77272	0.978052	3.49756	8.59435	36.05	0.351323	0.667589	0.157754	0.36335	29.4103	5.50349	3.73728	1.22935	8.85075	0.866346	0.846178	81.1794	811.706	21960.6	348.864	31.8284	111.056	13.0488	22.9612	30.9007	9.43728	42.0572	9.69607	7.23089	122.459	6.54917	21.8966	1.6832	0.421113	0.123261	0.337794	3.63042	0.0721055
CHN	129.483	300.886	10.5992	12.6502	71.9835	1584.96	150.403	6.30796	608.929	100.354	1003.91	154.324	31.8475	87.877	128.33	993.133	10.0016	12.8415	5.62692	5.90542	667.601	189.254	75.5195	37.7009	193.154	21.1431	20.6908	2044.55	16313.7	5869.75	157531	873.459	1640.44	193.219	447.863	466.088	406.493	790.029	196.066	150.065	176.386	168.305	257.187	65.9099	9.09217	2.06795	22.145	109.124	0.411982
CAN	512.524	911.924	35.4262	26.7751	155.389	4924.64	429.778	12.4068	2101.79	256.476	3581.08	572.132	67.3833	157.014	857.132	4503.76	31.624	64.3841	17.7083	14.4119	1545.34	412.421	420.232	94.9221	744.64	56.0599	50.0537	8685.1	371035	10345.4	8163.87	351645	3607.32	2127.01	2119.79	6170.54	602.278	2333.5	803.852	738.112	2352.74	473.599	555.295	158.859	7.87349	14.6397	18.7989	77.2059	1.35176
KOR	2.55516	3.81604	0.217363	0.547801	0.914362	21.5803	2.21078	0.0886935	10.0322	1.9322	13.7062	5.11559	0.572958	1.33646	2.54391	15.7276	0.151881	0.296542	0.0898403	0.403997	7.82876	2.59552	1.5309	0.818328	3.26683	0.356978	0.328299	27.5918	292.923	84.432	220.202	12.9796	2874.63	5.43071	14.2232	11.5744	8.89858	22.2795	3.46832	3.87415	86.6851	3.07857	9.94915	1.08408	0.759663	0.0638543	0.258732	3.5044	0.0140221
BRA	2331.07	12057.1	647.515	219.527	1246.57	34539	1857.35	95.3297	14648.5	1641.34	24862.4	2876.45	1019.21	1381.07	2224.76	22059.5	274.643	906.353	105.589	111.204	27398.4	3171.91	4784.89	2431.4	3528.41	1387.33	313.552	31110.9	121981	30416.8	38632.1	8030.61	10941.2	2.61803e+06	11653.8	10113.2	41571.7	3811.92	3643.54	2547.71	10673.7	2164.5	3452.03	972.452	123.314	730.366	579.389	2863.42	5.66354
IND	9.41562	22.2684	1.33458	1.16329	4.23707	86.5619	8.95432	0.569732	44.286	5.06218	61.1285	12.2827	1.88518	5.04239	7.30388	62.1358	0.943088	2.59233	0.764554	0.508895	35.7454	11.7899	11.2848	2.0885	12.4504	1.83484	1.55434	143.781	495.832	139.379	91.8461	32.7681	44.9831	15.6796	18670.4	23.2256	37.1216	31.6317	15.1041	16.127	30.3059	8.97251	44.2995	10.6599	2.31779	0.752465	1.09079	65.4242	0.759206
MEX	12.9481	23.5881	0.500569	0.452213	4.30472	123.9	14.0374	0.261815	73.7681	4.21915	70.4288	10.5439	1.46379	3.40519	7.96215	56.0085	0.419401	1.43305	0.448196	0.190502	36.2295	7.56836	12.6984	1.46924	10.4011	1.25232	1.13663	112.829	11039.5	358.504	76.1818	232.097	51.9382	39.825	16.8791	126853	15.2468	33.6635	38.3673	6.55548	30.2936	8.64493	5.01379	1.72256	0.291538	0.240036	0.282939	1.03089	0.03954
RUS	1754.3	2504.38	455.643	344.991	999.998	13725.9	1830.34	1777.6	3581.34	11020.5	7439.42	2075.08	286.886	1561.15	4622.03	8562.45	1435.74	232.45	1737.06	39.3482	4380.58	2314.08	561.165	658.285	3374.78	220.087	763.909	14081.3	28174	23500.6	58521.5	1609.01	5761.65	620.163	6211.66	948.82	229157	1125.33	1461.73	8306.46	14222	1480.43	665.753	265.28	112.655	415.122	1721.1	155.097	12.031
AUS	37.575	83.0369	4.09191	3.62484	12.3707	271.154	39.311	1.51119	128.776	32.8731	202.968	45.5465	7.77122	15.4132	48.1561	224.17	2.14592	9.32337	3.18293	2.22749	130.336	29.5645	34.5518	8.13554	61.2854	5.75956	5.1984	868.31	2577.52	3228.8	1696.01	213.744	775.664	50.399	248.265	119.208	70.4009	48959.8	71.4982	59.3202	592.216	43.637	258.209	43.6797	1.63017	2.16198	3.81778	38.6067	0.902367
CHE	13.709	7.20027	0.385726	0.243788	2.2795	69.4572	3.27184	0.122894	11.1794	1.78577	40.7866	3.18841	1.39619	3.08155	2.59108	37.8647	0.201138	0.544964	0.160654	0.0685373	9.28059	3.93225	2.25765	0.849988	3.67719	0.763519	0.802733	29.6275	45.0108	7.39963	7.63414	3.14783	2.76593	2.08085	2.8904	2.36896	3.61169	2.52865	409.528	4.57739	2.23922	2.08259	0.75678	0.998347	0.0412605	0.211587	0.125973	0.226784	0.00724228
TUR	42.308	58.1021	45.7823	27.6066	15.4536	436.146	34.6432	1.64394	118.853	15.9735	212.941	128.881	7.73856	20.1239	33.7276	280.7	4.03324	6.41214	3.59994	3.9684	91.817	40.061	23.5576	94.7574	37.097	8.2256	5.68594	317.029	489.174	56.1675	108.231	43.3963	32.8694	15.6281	25.8379	27.3839	129.461	27.2469	38.7528	16259	30.9454	22.2885	10.2896	26.5574	2.81597	8.1202	49.2429	2.60012	0.203373
TWN	1.08529	2.49927	0.214948	0.192872	0.759035	13.7233	1.35123	0.140197	5.02442	0.907159	8.32833	1.50188	0.388983	0.66455	1.13382	8.08782	0.150722	0.179031	0.111207	0.0938153	5.68638	2.10513	0.827027	0.390257	1.6306	0.24535	0.284366	18.4712	136.997	68.1324	6.1781	8.11528	17.7751	1.54467	3.39253	4.21416	6.18499	8.99648	1.61146	1.36458	351.3	1.56859	4.58782	0.978468	0.021595	0.0233817	0.0337866	0.56705	0.0103147
NOR	93.5517	167.392	5.36788	4.13893	34.5284	1111.87	431.505	7.00271	317.43	109.766	519.613	99.2536	11.3158	37.9545	105.569	425.437	18.5474	15.2631	7.4831	1.96291	320.057	130.535	66.1355	15.8824	1150.79	12.2025	18.2607	1659.74	1636.37	298.324	236.77	98.3731	96.0497	58.7343	69.1071	71.2609	94.2507	85.7989	131.757	80.8744	79.1432	14376.6	26.2379	20.195	0.459641	0.989412	2.79603	3.21155	0.239978
IDN	513.506	1827.61	82.2744	62.6207	212.507	5759.58	546.091	44.9765	2883.75	300.332	3535.3	631.832	82.2647	279.745	378.929	3165.64	33.3361	150.023	17.371	23.7719	3399.33	821.74	379.24	164.446	590.68	111.248	98.4541	6673.56	36039.6	24957.8	17290.8	2170.24	6564.92	1363.24	9831.21	1440.85	969.854	4140.09	592.466	1278.96	5838.28	480.474	526245	273.253	116.997	92.1358	20.264	818.878	2.08087
ZAF	159.269	171.039	5.48571	6.42884	21.1019	868.531	48.8002	2.0732	501.06	43.9621	436.907	63.8744	9.80829	25.7833	110.854	524.384	3.3628	11.5753	2.69504	2.35971	244.654	46.9625	82.4869	13.6566	61.7065	8.50909	7.95041	1631.96	2155.19	1784.32	951.613	141.014	189.189	128.825	536.065	102.524	68.0117	327.895	94.0335	78.1412	256.278	74.6427	113.221	26734.6	2.18793	1.6632	2.18907	12.7888	0.644259
AFG	0.299876	0.346431	0.0286903	0.00914548	0.0348864	1.32444	0.80461	0.0138398	0.31829	0.226363	0.607755	0.111127	0.0215983	0.0962345	0.125052	0.980372	0.0163655	0.0711409	0.0145569	0.0082327	0.217887	0.204025	0.0386028	0.0202725	0.117376	0.344532	0.0158567	0.63624	2.84612	2.1572	2.31225	0.117387	6.33847	0.253145	11.7071	0.240394	1.26167	0.290347	0.0762907	0.385655	0.476134	0.0788966	0.228742	0.0440675	74.7182	0.00311627	0.00518345	0.130106	0.0020183
ARM	0.756804	1.60718	0.0812572	0.0225596	0.0787706	1.13779	0.788774	0.116982	0.708492	0.129958	1.40446	0.213903	0.037299	0.246156	0.396514	1.31682	0.265909	0.184119	0.0708373	0.0199745	0.547741	0.224689	0.10522	0.0561126	0.24976	0.101184	0.0486183	0.987814	5.27597	1.78801	1.35506	0.304267	4.78163	0.332409	0.53541	0.582297	6.16249	0.799963	0.400073	0.319729	0.670794	0.133741	0.370323	0.140154	0.0150564	72.5932	0.0213124	0.0178175	0.00605322
AZE	2.15459	1.1227	0.159299	0.10675	0.653254	16.8895	1.25776	0.116985	2.26802	0.335799	8.34513	1.09973	0.132423	0.487449	0.704651	27.8549	0.733844	1.43596	0.942513	0.0814884	7.41481	1.27511	0.555945	0.441864	0.599921	0.250882	0.150363	5.71747	23.0714	3.40179	2.478	1.11092	9.75593	0.781931	5.65346	1.15696	47.1896	1.28316	0.774917	13.3715	1.27099	0.306475	0.627462	0.270582	0.130647	0.0966707	620.397	0.0402857	0.00824302
BGD	2.32079	5.13975	0.105677	0.040818	0.328608	13.4142	1.71888	0.0585404	5.165	2.96871	5.51402	0.685329	0.0972935	0.432234	0.949117	10.465	0.0521236	0.623384	0.192533	0.0381339	4.79032	2.31294	0.707847	0.120951	2.67468	0.119909	0.0806567	46.4646	44.3386	5.70742	3.96526	8.3796	2.50498	0.534328	14.032	1.07756	2.34549	1.35949	2.55717	0.586184	0.831746	2.51206	0.642069	0.496174	0.901454	0.0136502	0.0193757	1710.93	0.00429964
BTN	0.910187	0.475185	0.113914	0.0256026	0.0817519	0.819219	0.936039	0.0495521	1.32465	0.207137	1.50006	0.285959	0.0501759	0.279492	0.72157	1.87192	0.0461654	0.189082	0.0424019	0.0230332	0.84249	0.184553	0.115255	0.0594821	0.385763	0.0818855	0.0422093	1.18533	9.14388	2.99918	0.789873	0.62937	11.0999	0.485003	15.0213	0.93461	1.42554	0.846409	0.134277	0.314217	1.08233	0.195344	0.543077	0.0954289	0.0141332	0.0105852	0.0144927	0.257511	37.4269
BRN	3.01242	2.40896	0.320188	0.1448	0.832611	5.90608	3.09026	0.130307	3.64024	0.536794	5.12914	0.90708	0.17424	1.06297	1.40196	5.65787	0.162741	0.592794	0.127414	0.11402	3.97161	1.06295	0.475197	0.222548	1.17657	0.394188	0.273627	12.6884	64.5821	143.43	25.0222	2.49139	70.0472	1.90627	24.6812	3.50792	4.85282	70.0221	1.7998	1.46454	6.22695	0.664035	3.8922	0.769496	0.0420554	0.028872	0.050455	0.257757	0.0172827
KHM	228.814	210.517	16.5316	3.33978	15.3568	434.055	187.542	6.38139	138.036	29.7969	353.928	39.6928	6.29138	56.9961	91.2217	259.124	7.59625	20.9218	6.42672	2.84112	154.322	38.5275	23.1874	5.99772	128.053	21.8822	7.85628	571.251	2645.46	490.386	3661.44	127.75	479.221	38.5543	100.986	69.385	263.975	119.853	102.644	54.2117	61.5514	120.616	63.75	31.1931	0.847164	0.750951	1.25778	4.97387	0.398891
PRK	6.49505	4.2988	2.01932	0.209761	1.329	15.8797	8.90173	0.43933	19.4272	1.05784	20.3474	2.64567	0.649541	2.02783	4.09331	18.6348	0.346051	1.27163	0.271404	0.159035	10.1905	4.62718	1.18328	0.983158	3.03201	1.00875	0.463625	15.1729	116.519	197.941	1348.19	5.45011	309.636	55.2429	11.9221	54.7115	14.1542	8.0372	3.45831	2.60551	8.99972	1.6144	5.42215	2.38479	0.106319	0.0634113	0.209691	0.67902	0.044197
FJI	0.83772	1.03532	0.0888893	0.0677185	0.166841	5.11807	2.83192	0.0532959	2.76824	0.261434	5.64622	1.09358	0.0847598	0.323539	0.762471	6.68503	0.0630784	0.384509	0.0591069	0.0587586	1.53635	0.424242	0.934167	0.144002	0.65004	0.144016	0.0806467	10.2334	50.5508	98.2044	8.93566	2.62076	114.656	0.842063	1.69857	1.66475	1.54339	42.0706	0.491086	0.573725	8.67192	0.386373	2.03137	0.381808	0.0332452	0.0475873	0.0330745	0.350751	0.0168921
PYF	0	0	0	0	0	0	0	0	0	0	0	0	0	0	0	0	0	0	0	0	0	0	0	0	0	0	0	0	0	0	0	0	0	0	0	0	0	0	0	0	0	0	0	0	0	0	0	0	0
GEO	0.535764	0.646284	0.170323	0.108623	0.231933	5.16857	2.58204	0.0638411	2.35224	0.212688	6.23253	2.93211	0.0810891	0.245715	0.576362	7.9858	0.161741	0.3559	0.0836417	0.0428516	1.20992	0.438523	0.205535	0.220228	0.534953	0.132343	0.106652	2.71696	11.8281	4.7688	3.09442	0.532076	66.0531	0.590455	1.22108	1.02868	7.07001	2.51669	0.35369	17.2563	4.82191	0.281856	1.27163	0.305836	0.077711	0.738686	0.405352	0.0476531	0.0198162
HKG	0	0	0	0	0	0	0	0	0	0	0	0	0	0	0	0	0	0	0	0	0	0	0	0	0	0	0	0	0	0	0	0	0	0	0	0	0	0	0	0	0	0	0	0	0	0	0	0	0
KAZ	6.43396	5.37374	0.966655	0.413471	8.14374	32.9013	2.25135	1.06423	15.893	3.65546	28.1943	6.02382	1.25717	2.5042	2.61468	40.5458	2.48697	1.60796	1.01108	0.37812	8.98116	6.40621	2.50269	5.79111	4.13374	0.805413	1.41102	18.3532	64.6208	14.4691	94.6079	3.3992	20.4245	5.10144	6.03618	5.1658	86.2968	10.7708	3.60841	26.2887	8.9889	4.18382	4.45338	3.26416	1.54302	0.264948	1.7482	0.250161	0.0493288
KGZ	0.390427	0.361724	0.13497	0.0286491	0.162017	1.74905	0.95079	0.0410131	0.853204	0.174698	1.48923	0.235871	0.0522408	0.182358	0.288818	2.65322	0.0521783	0.219883	0.134178	0.0288533	0.455203	0.255765	0.10436	0.105139	0.343505	0.0721733	0.0578454	1.20854	4.34861	1.66326	4.03587	0.235086	20.8626	0.479658	0.899516	0.737845	4.58034	1.55739	0.155327	2.76813	2.59083	0.161694	0.66268	0.182607	0.185228	0.0187899	0.248686	0.0245274	0.00725275
LAO	189.405	208.597	24.1414	4.94244	25.1925	326.399	165.797	6.58199	443.931	33.9517	466.943	29.7627	5.95695	95.8944	48.6857	291.728	7.83758	26.5336	6.40362	3.97246	147.104	164.423	17.5958	10.4464	48.1828	21.6733	39.1561	248.926	560.627	357.655	539.881	57.344	331.68	56.1015	55.0475	68.1307	283.664	68.5656	131.3	51.2436	101.852	76.2979	81.0387	19.4023	0.920149	0.895282	1.41583	2.13678	0.49414
MAC	0	0	0	0	0	0	0	0	0	0	0	0	0	0	0	0	0	0	0	0	0	0	0	0	0	0	0	0	0	0	0	0	0	0	0	0	0	0	0	0	0	0	0	0	0	0	0	0	0
MYS	675.285	2009.89	103.937	93.4512	452.762	6834.55	754.393	169.317	2775.09	806.501	5280.83	849.588	131.561	455.655	805.388	4113.11	108.246	197.394	67.6052	49.7963	4577.24	822.302	617.05	287.606	1255.75	133.388	145.98	11160.3	32085.9	26712.6	14467.1	2851.22	9276.36	1121.03	6687.83	1630.83	1503.3	4683.88	1107.57	1545.92	3584.63	715.507	12413.5	1632.2	18.082	13.3392	20.5565	254.661	1.51728
MDV	0.0920387	0.0443357	0.00911007	0.00144863	0.00433127	0.0650918	0.0845519	0.00400129	0.0770392	0.0147484	0.0773124	0.0146118	0.00334758	0.0300767	0.0444767	0.0836195	0.00441937	0.0139258	0.00398755	0.00144539	0.0325655	0.0139226	0.00972427	0.00424717	0.027052	0.0105008	0.00302402	0.12191	0.442984	0.139482	0.0368899	0.0548004	0.0217519	0.0440286	0.0380414	0.049306	0.14319	0.0267354	0.00795457	0.0224583	0.0121942	0.00949733	0.0147638	0.00597851	0.00062859	0.000511416	0.000745212	0.000947457	0.000433888
MNG	1.28924	1.27957	0.159058	0.14572	0.467551	4.8208	3.11173	0.0857168	3.03696	0.354401	5.13308	0.718811	0.120478	0.500738	0.757466	16.7309	0.0920996	0.471463	0.0870823	0.0665043	4.54688	0.812528	0.276248	0.181401	0.842806	0.187024	0.140816	6.33666	41.5177	13.9174	488.092	1.62893	111.166	0.960843	2.62803	4.08153	41.2289	3.09527	1.09767	0.977569	6.40707	0.541685	2.07579	0.415553	0.0358873	0.0283797	0.0716658	0.173764	0.0165856
MMR	22.9015	35.993	33.9596	1.13291	6.41547	80.3354	22.5746	0.73919	36.4264	8.31049	70.7145	11.0327	1.74879	11.5577	9.97158	81.7127	1.09288	4.393	0.953939	0.828152	50.381	10.7933	8.18664	26.6495	16.4352	3.82497	9.90254	405.942	764.022	456.775	735.95	77.7559	408.027	13.4783	5531.29	23.5042	27.7303	162.025	30.4013	12.433	74.9072	9.97004	143.656	11.7435	0.642436	0.267017	0.376053	116.705	0.172275
NPL	2.55477	2.10744	0.19104	0.0618717	0.354124	7.41708	2.53929	0.0791988	2.92319	0.39338	6.1285	0.951869	0.302765	0.71139	1.04529	6.67827	0.0991677	0.817221	0.0834774	0.0538482	1.90084	0.660004	0.510096	0.13726	1.08986	0.275206	0.125286	10.1941	33.7876	30.3383	17.9843	2.24438	13.357	0.995966	372.052	1.80844	3.42131	2.17881	3.31009	1.18321	1.82019	0.696252	1.07022	0.368309	0.0490114	0.0214302	0.0363145	0.803519	0.0572992
NCL	0.904489	1.05531	0.109045	0.0439722	0.118646	2.65784	0.934356	0.0440979	3.23681	0.704982	8.42724	0.26211	0.0676766	0.322232	0.498052	2.93854	0.0533655	0.688815	0.0430258	0.0534791	0.700952	0.297546	0.22465	0.0814658	0.444428	0.117324	0.0714144	2.51381	11.2042	48.7763	3.11888	1.75689	10.199	0.56305	1.32208	0.853437	1.56208	9.38816	0.786521	0.403744	2.28559	0.222937	0.744436	0.369984	0.0114483	0.0101896	0.0164553	0.069514	0.00527565
NZL	68.6414	362.43	5.7495	6.06342	21.9923	684.569	94.5448	3.91723	260.962	51.0323	451.532	56.7426	8.90344	27.0987	72.1725	528.933	4.59544	24.5379	9.74928	4.13991	399.265	45.68	36.5473	11.6778	72.0574	8.67035	8.4846	1287.21	4578.48	4320.41	4436.48	312.311	5243.6	85.7555	265.272	261.749	125.355	8123.55	125.559	45.603	759.078	54.9335	494.622	124.577	1.93605	1.38477	3.19301	14.6197	0.629838
PAK	0.152227	0.459076	0.00992719	0.028254	0.0535223	1.5709	0.205115	0.00876554	0.716685	0.0609485	0.866948	0.241282	0.0201395	0.0546631	0.133841	1.06601	0.00800274	0.0341136	0.00519439	0.00748201	0.669076	0.155182	0.190825	0.0225463	0.214234	0.0150656	0.0205529	5.0442	8.18776	1.68381	1.88639	0.614639	4.70093	0.0861126	1.48159	0.209553	0.137711	0.744561	0.226723	0.284789	0.170559	0.249315	0.240581	0.328139	0.0108871	0.00608591	0.0112575	0.0321696	0.000871281
PNG	32.5324	195.325	4.20228	1.45543	7.41878	1064.02	29.9581	0.936115	49.9892	13.6682	115.323	13.8755	2.27301	9.68336	18.2712	122.531	1.2685	3.84348	0.956284	1.00662	73.135	31.884	37.6699	3.22807	22.6566	3.10227	10.2225	588.234	1569.97	6418.71	411.994	48.7325	1919.97	11.559	30.2935	30.6461	39.9964	501.952	13.4804	12.0253	68.1101	8.33144	192.182	4.03592	0.539239	0.266132	0.561953	3.37357	0.0951027
PHL	23.8983	66.7796	1.65075	1.23715	7.51525	330.608	29.2367	0.773009	70.2158	19.5936	134.71	17.3117	2.81728	8.10928	21.5823	122.535	1.08029	2.93178	1.16357	1.61859	119.848	18.7071	8.83549	1.88971	33.0978	3.01195	3.19295	335.858	2152.28	2251.43	404.929	205.099	592.573	59.8866	38.3959	53.6962	43.1338	61.356	64.4307	16.5926	62.6707	25.2999	151.561	34.5007	0.225794	0.441607	0.47926	1.85688	0.0985191
WSM	0	0	0	0	0	0	0	0	0	0	0	0	0	0	0	0	0	0	0	0	0	0	0	0	0	0	0	0	0	0	0	0	0	0	0	0	0	0	0	0	0	0	0	0	0	0	0	0	0
SGP	0.312226	0.734457	0.0365265	0.0347518	0.174774	3.2633	0.428688	0.0168563	1.25691	0.298642	2.74046	0.240896	0.0526815	0.182741	0.811916	1.79729	0.015961	0.132635	0.0456086	0.0508433	2.11306	0.276305	0.175373	0.0409111	0.464816	0.044361	0.0535466	4.42649	12.8137	9.50779	5.13536	1.24251	3.53067	0.669678	2.80796	0.665607	0.504964	5.12244	0.876538	0.232365	0.816729	0.392433	3.50706	0.778451	0.00959882	0.00604806	0.011297	0.190263	0.00263126
LKA	7.89133	26.4244	1.47556	1.02676	7.51407	131.39	7.45017	8.69034	27.1163	23.0524	70.1719	9.78378	1.88461	4.01217	10.7542	72.6948	4.876	1.40953	37.6509	0.421221	39.1629	20.3167	4.89074	2.01797	11.798	1.33254	1.39142	166.26	339.269	258.609	22.9159	30.633	58.1072	10.464	192.219	51.5515	238.216	23.959	12.2614	88.8628	5.76321	6.64566	5.42087	10.8393	0.582931	0.608437	3.11843	0.684514	0.0244576
TJK	0.0793684	0.0432932	0.0853201	0.00176223	0.0281924	0.0886663	0.155266	0.00434246	0.0682871	0.0100151	0.152465	0.0239215	0.0109732	0.0249418	0.023901	0.160962	0.00408583	0.0121251	0.0040154	0.00172854	0.0290487	0.0264741	0.0118789	0.00768863	0.0237944	0.0138875	0.0225931	0.0739524	0.309987	0.132161	0.087299	0.0176089	0.834047	0.0347145	0.0340897	0.0398016	2.52253	0.0503679	0.0124276	0.0426786	0.0676111	0.0689233	0.0253952	0.00739093	0.000759482	0.000665066	0.00317159	0.00102153	0.000304155
THA	113.603	342.423	13.2506	26.0342	95.1781	1234.03	141.731	6.60269	442.94	131.206	679.146	100.37	21.902	52.4413	76.0327	604.511	12.9178	53.0052	10.5753	9.41073	791.631	145.298	124.537	27.6267	280.548	14.4766	23.5229	1554.44	6041.48	6127.09	2372.17	735.359	790	155.894	608.503	229.631	211.201	553.048	377.734	86.0119	349.615	174.272	665.845	246.611	1.55481	1.44149	3.31562	30.4325	0.41025
TKM	0.106341	0.0491177	0.0136953	0.00308006	0.0228584	0.161554	0.148009	0.00471036	0.0953333	0.0127759	0.116411	0.0406399	0.00565714	0.0292106	0.020463	0.359472	0.00534265	0.00896656	0.0124139	0.0014892	0.0342869	0.0252897	0.00799687	0.00836938	0.0184004	0.0102529	0.00665111	0.0760052	0.655953	0.163253	0.146015	0.0210722	0.129002	0.0187412	0.030995	0.0305928	0.774046	0.0232696	0.0298086	0.0958558	0.0210336	0.00838707	0.01956	0.00693822	0.0489251	0.00269177	0.0148257	0.0009205	0.000201642
USR	0	0	0	0	0	0	0	0	0	0	0	0	0	0	0	0	0	0	0	0	0	0	0	0	0	0	0	0	0	0	0	0	0	0	0	0	0	0	0	0	0	0	0	0	0	0	0	0	0
UZB	0.123645	0.258705	0.178343	0.0137484	0.122124	0.681131	0.0742466	0.0868206	0.338506	0.0590131	1.06437	0.131941	0.0292509	0.0559116	0.0977862	1.37424	0.0688471	0.0615324	0.0337806	0.0143878	0.230016	0.644068	0.181967	0.052276	0.0980723	0.0381176	0.0472926	0.436576	1.2722	0.539806	0.493708	0.254906	1.30606	0.192688	0.363846	0.151582	10.1099	0.281009	0.0950687	0.900242	0.174295	0.0463504	0.144822	0.0420618	0.00591842	0.00656094	0.0500656	0.00587442	0.00147292
VUT	0.479702	0.834343	0.0474585	0.0114769	0.027573	1.30036	0.559001	0.0202654	0.377414	0.0669052	1.45239	0.0725541	0.0183459	0.156154	0.168262	0.600785	0.0229908	0.0912675	0.0188244	0.0104586	0.222518	0.0842857	0.0401748	0.0214371	0.145149	0.0555302	0.017298	0.482395	5.37446	5.97117	1.77833	0.249187	6.84944	0.160958	0.435854	0.228238	0.779357	1.43343	0.0955697	0.134858	0.338295	0.0576355	0.223489	0.0522644	0.00321053	0.00280891	0.00417262	0.299138	0.00200187
VNM	133.301	371.675	19.1624	5.70068	170.467	1079.64	111.023	23.4064	519.532	49.4034	720.449	57.8152	19.0915	86.9632	62.2404	675.576	17.9787	42.2439	14.2434	2.47184	398.778	302.778	61.3027	62.0405	115.804	21.0886	74.2816	898.72	3563.51	2641.29	2735.25	313.36	1507.21	75.794	350.215	107.723	723.812	472.45	211.124	64.9337	690.643	114.806	451.188	69.9261	1.48096	4.30636	1.90773	6.23709	0.416027
ATG	0.113934	0.105431	0.00604748	0.00356236	0.038875	0.828869	0.09525	0.0041065	0.192984	0.0164589	0.455569	0.0675783	0.00541407	0.0594601	0.0342557	0.342582	0.00611963	0.011651	0.00509912	0.00546988	0.0453829	0.0700758	0.0129063	0.00787568	0.0449651	0.0116419	0.00552716	0.158412	2.8848	0.0954591	0.205552	0.0602983	0.390186	0.240086	0.0571837	0.190752	0.388664	0.0448004	0.0432667	0.0434216	0.0352215	0.024551	0.0285868	0.041298	0.00232865	0.00201364	0.00264869	0.00334878	0.00189296
ARG	99.578	514.302	84.2411	48.3886	54.5323	1971.58	110.287	5.07201	1737.6	43.083	1006.28	310.373	30.2359	73.0797	78.9195	1927.56	22.7047	166.361	7.15638	11.5728	1278.19	185.327	357.087	42.749	122.597	22.9552	22.8545	1219.53	4913.23	1059.55	2447.12	350.314	513.21	7711.05	1924.4	664.377	453.516	253.549	177.1	201.149	162.06	87.5272	206.88	590.178	10.9947	9.07138	15.1214	427.006	0.983929
ABW	0.00592234	0.00785075	0.000350765	5.09E-05	0.000194304	0.0259168	0.00343901	0.000134043	0.00897472	0.000384559	0.0214575	0.000595735	8.53E-05	0.00145031	0.000705719	0.0180918	0.000187028	0.00018722	0.000111642	5.29E-05	0.00896868	0.00285301	0.000264525	0.000120875	0.00110856	0.000464978	0.000102041	0.0195989	0.163445	0.00171475	0.00743034	0.00105812	0.000653506	0.00146994	0.00104417	0.00835451	0.0104853	0.000904708	0.000537677	0.00167757	0.000341026	0.000312882	0.000335797	0.00016841	7.78E-05	6.18E-05	7.35E-05	0.000253329	5.10E-05
BHS	0.624421	0.660877	0.0306237	0.0562264	0.115769	6.98253	0.543465	0.0381056	10.6268	0.187676	4.10152	0.143316	0.17134	0.229075	0.230566	2.74492	0.106564	0.0500262	0.0409007	0.0246848	0.404695	0.367986	0.21869	0.0695905	0.342143	0.0738478	0.0446809	13.3891	29.1327	1.44322	1.12223	1.52895	0.264997	0.456003	0.285591	1.43776	1.59789	1.31543	6.28449	0.286017	0.127504	0.207885	0.0823086	0.194611	0.00964574	0.0136806	0.0124978	0.0163781	0.00754968
BRB	0.0286125	0.0293909	0.0013238	0.00368751	0.00366098	0.155684	0.023109	0.000823879	0.056856	0.0049783	0.278854	0.00909772	0.00131146	0.00763597	0.0251512	0.108295	0.00136482	0.00910762	0.000974634	0.000576057	0.0941891	0.014051	0.00534526	0.00187595	0.0129841	0.00251383	0.00157576	0.453103	0.986646	0.0322131	0.0516866	0.0759622	0.0128524	0.0895011	0.0172488	0.0407385	0.0638179	0.0172214	0.036537	0.0113931	0.0157652	0.0105367	0.00799625	0.00900593	0.000469499	0.00044995	0.000665465	0.000896472	0.000365696
BLZ	14.1229	35.9442	0.621977	0.518587	4.20608	84.5291	24.8169	0.378881	32.3093	2.76616	88.9385	5.41908	1.26417	3.50038	185.636	34.5062	0.548267	1.49949	1.1018	0.335968	22.2379	5.86271	34.4183	0.815938	18.5563	1.04319	1.39491	1322.01	1394.2	514.488	196.739	69.7158	45.9846	23.1097	6.30695	49.342	90.7421	11.04	6.05672	5.08793	7.77901	4.02501	3.95332	2.84626	0.283153	0.323917	0.333001	0.699585	0.216993
BMU	0	0	0	0	0	0	0	0	0	0	0	0	0	0	0	0	0	0	0	0	0	0	0	0	0	0	0	0	0	0	0	0	0	0	0	0	0	0	0	0	0	0	0	0	0	0	0	0	0
BOL	229.517	260.174	21.343	3.65916	21.4142	1301.87	150.226	4.62163	510.541	35.4206	1020.31	50.3144	6.35274	50.6787	41.8979	1182.35	11.1124	14.1762	8.3938	3.37521	373.005	113.365	35.7636	10.1728	58.2997	17.5802	7.08359	1056.98	8333.58	3019.83	730.125	301.692	148.597	1446.45	509.13	461.712	622.559	143.464	122.12	63.2293	51.9678	24.9693	25.3465	38.8924	3.12076	2.59796	3.49387	14.7126	2.25638
VGB	0.025309	0.0260065	0.0014466	0.000405983	0.00181915	0.117304	0.017247	0.00077592	0.0636311	0.00302302	0.101351	0.00361815	0.00163912	0.00710035	0.00551592	0.113066	0.00101198	0.00151667	0.000751894	0.000348425	0.00974524	0.0131602	0.00258187	0.00162612	0.00594722	0.00266389	0.000770712	0.030683	0.661087	0.0131425	0.036234	0.00666371	0.00494238	0.020304	0.00970053	0.035306	0.0667809	0.0503834	0.30545	0.00939705	0.00695611	0.00207103	0.00375696	0.0374308	0.000369162	0.019268	0.0066176	0.000499514	0.00029728
CYM	0.0278745	0.0275946	0.00131358	0.000729955	0.00296567	0.119933	0.0213719	0.000903375	0.106222	0.00346043	0.100063	0.00942769	0.00105038	0.00791758	0.00784898	0.103849	0.00131508	0.00241936	0.00101781	0.000498882	0.00956881	0.0145258	0.00281787	0.00147005	0.00738895	0.00282822	0.00103252	0.026163	0.658144	0.0264857	0.043052	0.0113836	0.00774521	0.0404498	0.0139142	0.043645	0.0934879	0.00913477	0.0123453	0.00924913	0.02569	0.214371	0.00436325	0.00217267	0.00049734	0.000438972	0.000566986	0.000702948	0.000447974
CHL	51.0953	140.985	10.8921	3.46146	18.8448	646.818	193.423	2.75363	916.418	43.72	551.357	57.3201	9.35792	22.8585	93.9029	1022.79	3.9334	15.4629	5.23559	2.14716	531.695	45.2362	100.712	10.615	107.253	9.34482	9.59834	735.889	13991.8	3729.55	1682.86	984.956	967.458	846.139	244.505	2013.38	83.5009	180.868	131.879	73.6116	328.099	124.05	158.475	49.8336	1.24693	1.49477	2.21332	17.1705	1.01225
COL	172.191	1699.34	10.3138	9.86793	179.656	2716.34	567.832	4.80684	1072.77	206.557	922.367	92.5965	61.9854	23.5683	165.795	2274.69	13.8692	156.428	2.94341	5.09672	681.093	111.709	281.217	48.5465	338.943	66.9549	59.0635	2162.35	16596.4	2126.57	285.107	936.983	237.933	282.903	51.8612	781.309	649.127	198.12	294.69	43.7225	108.111	419.698	28.7579	26.1823	2.69635	2.73269	6.16471	50.0779	0.497367
CRI	82.5464	390.104	1.92964	0.767362	25.8969	677.505	8.50117	2.7016	99.1925	110.034	165.987	11.5059	3.96986	5.04269	57.7757	355.378	0.92693	6.35401	0.384522	0.683801	144.084	18.3949	102.935	2.61954	129.841	3.21553	12.855	549.584	3682.92	107.755	92.6098	120.244	29.1387	12.0663	10.8196	206.159	46.1149	18.3896	86.0971	6.21243	7.34167	28.6036	7.99377	6.05893	0.147886	0.540813	0.339452	0.454854	0.0579322
CUB	5.15891	14.3848	5.03922	9.33402	1.57076	53.0978	3.68057	0.689377	189.397	3.25038	96.4573	1.97455	0.927368	1.29823	2.22576	34.4875	0.541528	0.509598	0.416289	0.527828	45.363	4.901	17.2986	33.3944	3.07603	0.602152	0.491649	29.058	81.7682	79.7591	173.186	49.7302	8.94807	7.78025	3.87223	26.4438	339.322	22.9695	35.9233	1.75904	1.89717	17.0315	0.983071	1.72324	0.160784	0.450629	2.25542	0.185492	0.0338673
ECU	98.7141	200.218	13.7213	1.04298	33.3188	747.513	18.514	3.44039	243.967	21.7918	359.769	154.186	11.8233	28.9538	80.1347	1308.14	29.2601	19.5084	0.999163	4.59466	261.057	68.3252	66.3033	20.3362	24.5066	22.0591	10.5811	308.602	2766.11	356.018	127.054	104.456	138.274	36.4586	13.7497	94.9254	633.53	35.0341	45.1485	47.8903	23.8954	21.1775	16.5981	10.7501	0.614518	2.67587	1.23004	1.65981	0.134679
SLV	5.33731	15.7899	1.1726	0.201314	9.28129	138.698	3.92875	0.10964	58.6085	5.47031	48.4898	2.59602	0.833164	1.04302	2.91131	26.8884	0.205905	0.349173	0.134959	0.128592	11.7714	2.69538	3.79643	0.558648	2.79484	0.705949	1.4975	42.6217	717.656	30.4339	8.23719	33.1556	10.0096	1.71487	2.82632	65.7986	34.6755	2.51358	6.13631	9.90945	2.35574	6.17075	0.686143	0.577021	0.0811455	0.135241	0.239159	0.150454	0.0410001
GRL	0	0	0	0	0	0	0	0	0	0	0	0	0	0	0	0	0	0	0	0	0	0	0	0	0	0	0	0	0	0	0	0	0	0	0	0	0	0	0	0	0	0	0	0	0	0	0	0	0
GTM	50.6569	168.729	28.4794	2.2002	15.1791	779.472	33.9706	3.073	556.643	65.1031	349.061	21.946	29.0734	12.1382	20.7376	354.502	10.8653	7.84887	1.72624	1.49249	364.268	68.6506	30.1466	5.51527	120.747	6.62364	3.60504	407.333	11996.4	966.375	134.64	868.128	664.857	41.6298	133.548	794.832	278.419	132.799	393.223	40.805	37.324	68.3912	29.2315	28.474	1.54067	1.9386	4.58266	36.7562	0.283367
GUY	0.422952	0.8044	0.0559462	0.0454027	0.0853026	3.10011	0.479024	0.0180712	2.14593	0.817121	5.78895	4.81245	0.037465	0.143937	0.845095	2.24118	0.0282633	0.186824	0.0289137	0.0209577	1.91186	0.306038	2.20521	0.109086	0.288786	0.0829691	0.0318375	15.178	67.0673	1.60697	1.79556	10.9926	1.63463	1.02219	0.445332	1.92328	1.34555	0.446917	0.466446	0.418728	0.579186	0.226874	0.154221	0.10495	0.0137874	0.0152608	0.0180773	0.0318153	0.00825886
HTI	2.23673	4.38891	0.113362	0.0536154	0.213623	21.8626	1.73602	0.0659996	4.46651	0.823768	14.7113	0.65694	0.105981	0.662912	0.669974	15.4277	0.109585	3.59624	0.0663243	0.0332974	2.84405	1.2731	0.361593	0.124126	0.786197	0.213889	0.113041	5.7991	256.721	4.9415	5.70982	5.67677	1.47322	1.35219	0.87307	5.13262	7.3032	0.982394	2.79174	0.981924	1.20024	0.439475	0.387065	0.273359	0.044911	0.0395977	0.0506861	0.0767374	0.0357876
HND	55.0517	448.09	13.7936	1.20033	24.7235	1067.44	49.831	0.92946	285.591	51.3125	332.457	34.033	8.09383	14.314	45.8364	325.519	2.30831	3.54894	1.00867	0.618302	411.462	73.1911	48.2523	6.18065	67.2257	4.3022	11.6831	449.414	7371.12	556.303	67.0833	315.744	105.63	44.9155	13.6542	303.68	197.347	49.5265	159.26	24.4256	20.3913	14.983	5.88186	9.99297	0.442123	0.652284	0.985284	1.06433	0.193883
JAM	1.82757	3.42893	0.0849199	0.810283	0.351411	17.2687	1.51784	0.0977975	4.57701	0.919637	11.9457	0.608797	0.121848	0.530639	1.37686	7.03019	0.0843393	0.181751	0.0866795	0.0384822	12.0925	1.48047	4.11927	0.143856	7.88099	0.173685	0.113052	106.012	202.49	33.3562	6.44662	24.4874	1.39351	1.22366	1.19566	25.9716	4.06086	1.60026	2.66763	0.844583	0.722657	11.8508	0.323699	2.14842	0.0244502	0.0319031	0.0565234	0.0705717	0.0158992
ANT	0	0	0	0	0	0	0	0	0	0	0	0	0	0	0	0	0	0	0	0	0	0	0	0	0	0	0	0	0	0	0	0	0	0	0	0	0	0	0	0	0	0	0	0	0	0	0	0	0
NIC	182.601	156.986	7.87739	1.78069	43.6462	961.455	67.1492	1.4742	619.129	107.488	416.257	33.0025	4.42855	20.2423	219.828	326.363	2.38214	6.85308	1.59307	0.881816	147.63	29.4863	36.6082	12.7605	59.1358	4.98681	4.27765	1001.49	11388.4	301.968	114.128	283.38	55.6029	24.9705	84.3038	1748.07	523.452	59.4029	138.597	35.7409	32.5314	33.6924	19.9038	12.3954	0.97478	1.32752	2.42307	12.9139	0.595246
PAN	92.8435	425.908	3.66563	1.49281	103.865	831.24	14.0802	3.29027	409.465	45.1519	119.703	100.356	7.50618	25.4705	8.82073	471.276	5.74274	1.42988	0.702998	1.54258	69.6313	132.775	251.66	5.22215	454.44	1.87729	34.7607	234.851	2705.63	911.36	78.0803	86.6394	48.5784	22.1804	93.8727	251.274	87.2601	11.5038	106.177	10.6036	9.11999	39.728	19.1437	3.01676	0.249219	11.704	1.29645	0.560605	0.124045
PRY	251.463	388.712	15.2376	7.96984	52.1813	4439.89	199.784	5.70464	902.953	66.5452	1671.99	136.704	24.2674	83.8431	148.712	1350.73	11.4219	46.2792	8.60958	3.81464	1092.25	140.712	94.8174	57.5952	114.885	90.9316	23.5611	667.529	10599.9	900.069	780.732	226.648	242.336	28080.2	379.709	416.556	1349.07	143.976	1040.52	206.101	244.127	76.2617	132.226	236.702	5.59467	4.65401	7.4042	76.4286	2.82165
PER	57.2286	121.464	30.4263	2.58725	18.5598	784.172	107.625	2.60873	715.915	15.0565	491.314	22.6471	6.30001	29.7453	22.2482	378.851	11.1337	84.881	1.30095	1.2243	257.606	45.3945	40.8486	8.69515	65.2099	4.72783	15.3429	529.139	3939.18	767.29	749.966	323.708	334.612	137.143	41.603	223.713	68.8478	166.085	67.2606	22.613	57.4026	158.818	223.855	24.7312	0.851548	0.706105	0.974838	4.07418	0.213783
SUR	7.44773	17.298	0.528043	0.462027	2.36414	72.7385	10.0114	0.322627	28.0464	4.44725	137.896	10.7768	1.09963	2.61739	4.11203	35.609	0.851301	1.71574	0.571501	0.227938	131.464	7.57528	8.8047	1.57067	16.4676	1.00175	0.904217	65.6859	317.773	22.0341	50.6566	22.0697	7.69318	17.7917	5.64532	19.9195	12.4979	5.26681	8.2184	7.20359	5.48722	85.593	1.92209	1.60405	0.130943	0.151	0.446214	0.352125	0.0837659
TTO	1.04111	1.36302	0.0556263	0.0863084	0.105089	6.69405	1.10295	0.0227969	4.60777	0.163181	12.0177	6.25569	0.0470665	0.228596	1.66574	4.94759	0.0362654	0.0851198	0.0229388	0.0157334	4.03992	0.460683	1.17879	0.0690334	0.551961	0.0880733	0.0426136	11.9572	161.782	4.17599	2.1789	12.7876	1.07787	2.8493	0.847434	6.28904	1.70365	1.0711	2.1945	0.466851	0.521097	0.37877	0.342154	0.702701	0.0142666	0.0271982	0.0240555	0.0407533	0.00907778
URY	9.17884	20.3131	1.0069	1.03918	4.59148	96.6269	12.5045	0.668472	415.67	7.65627	79.2874	9.34224	1.60831	5.04843	8.13673	90.2914	1.15676	3.7854	1.54133	0.386015	75.2725	10.0176	21.1522	1.61041	23.597	2.48954	1.42591	94.2236	281.513	42.9434	88.8871	21.3296	32.3426	348.441	33.276	72.8295	31.1776	12.925	28.5953	10.909	11.6938	181.865	7.30482	8.20943	0.589914	0.462491	0.923106	1.53872	0.425153
VEN	35.9521	115.143	2.55079	1.15452	5.81011	397.465	43.3431	0.987558	702.389	10.5985	383.418	28.9841	7.60437	10.4716	39.2585	376.097	1.67617	5.21648	1.19083	0.72539	253.903	21.7693	57.3276	8.26359	202.016	3.8027	2.48332	480.807	5468.15	276.654	238.703	459.807	80.9935	507.396	34.0288	353.444	81.5628	30.503	64.6341	20.3673	39.1824	23.0394	14.6683	10.8317	0.742346	0.828861	1.62368	2.337	0.463628
ALB	2.42468	0.849688	0.227862	0.212538	0.619174	21.8399	1.74585	0.0977301	2.25548	0.42952	7.06373	19.8084	0.45061	0.782599	0.428808	53.9585	0.457139	0.181016	0.361739	0.0498131	2.11738	0.872927	0.413528	0.585903	0.623929	0.317005	1.85089	3.67038	11.473	2.07637	1.31826	1.17386	0.587465	0.589728	0.857574	0.67173	10.7709	0.634657	7.70481	2.27221	0.57355	0.387909	0.369997	0.121961	0.095732	0.0852446	0.0901262	0.0662132	0.0772699
AND	0.00105671	0.000644117	0.000166292	0.000405917	0.000224303	0.00251521	0.000677858	0.000218847	0.01214	0.00054969	0.00391628	0.000621712	0.000189128	0.000933371	0.000732632	0.00186282	0.000289644	0.000339216	0.000519169	0.00014849	0.000941039	0.00085411	0.000614226	0.000543448	0.000789103	0.000371368	0.000279635	0.00164706	0.00344722	0.00129222	0.00114715	0.000728468	0.0019089	0.000997379	0.00155044	0.00159848	0.00945842	0.000819268	0.000291445	0.000932986	0.000438935	0.00056019	0.000536156	0.000521447	2.60E-05	2.62E-05	4.42E-05	0.00011224	2.16E-05
BLR	173.503	527.773	17.092	20.1147	175	2169.67	252.67	74.4513	235.889	94.4335	510.932	68.5135	35.9702	1178.96	71.6818	677.816	466.082	43.5048	394.14	3.24723	703.265	884.751	49.1876	54.4484	164.832	30.8163	61.7347	837.202	893.569	196.102	671.967	78.2778	79.571	45.1986	107.996	70.225	7345.23	49.4926	99.3488	165.127	92.3561	66.8712	23.4971	15.9966	4.49752	9.44655	25.7385	5.89823	2.06515
BIH	14.5932	4.01038	0.176439	0.217229	0.862957	43.5865	0.59751	0.0631499	2.45844	0.421597	12.5296	0.914973	29.3694	4.97012	0.405177	40.9118	0.269474	0.258116	0.174291	0.0350242	3.84703	2.87741	1.13849	0.849688	1.31125	7.01312	1.2557	5.5689	9.0541	1.49026	1.71737	0.805579	0.484506	0.361956	0.507123	0.459028	6.53113	0.794516	2.7909	1.55054	0.517854	0.480196	0.324459	0.158671	0.0260156	0.0335301	0.0577979	0.0364435	0.0311478
ISL	0	0	0	0	0	0	0	0	0	0	0	0	0	0	0	0	0	0	0	0	0	0	0	0	0	0	0	0	0	0	0	0	0	0	0	0	0	0	0	0	0	0	0	0	0	0	0	0	0
LIE	0	0	0	0	0	0	0	0	0	0	0	0	0	0	0	0	0	0	0	0	0	0	0	0	0	0	0	0	0	0	0	0	0	0	0	0	0	0	0	0	0	0	0	0	0	0	0	0	0
MCO	0	0	0	0	0	0	0	0	0	0	0	0	0	0	0	0	0	0	0	0	0	0	0	0	0	0	0	0	0	0	0	0	0	0	0	0	0	0	0	0	0	0	0	0	0	0	0	0	0
MNE	0.475733	0.318793	0.0855564	0.115441	0.245484	1.0769	0.360575	0.120981	0.72502	0.181165	0.71505	0.483643	0.29917	0.699069	0.276732	1.04881	0.602152	0.141877	0.345159	0.0250548	0.389666	0.484094	0.187188	0.394083	0.334336	0.258562	1.53408	1.03258	1.58368	0.571205	0.794409	0.259402	0.311251	0.322259	0.649677	0.368756	11.1843	0.28969	0.131352	0.624107	0.385917	0.20338	0.204246	0.0556888	0.0688697	0.0783178	0.113117	0.0756206	0.107149
MDA	2.20624	2.02488	0.336757	0.559696	1.41723	10.8144	1.03737	0.428258	3.11281	0.585525	3.36371	1.4714	1.99627	3.58937	0.991993	5.50889	2.28542	0.932487	1.30102	0.200548	1.92814	2.65952	1.04969	6.36828	0.943215	0.941337	2.141	4.88085	8.16865	2.16519	2.33395	1.25811	1.05357	0.840126	1.48813	0.868288	17.7327	1.15965	0.636871	2.16628	1.43572	0.5385	0.600127	0.258882	0.472282	0.490215	0.552672	0.493285	0.444672
SMR	0.000256892	0.000155036	4.33E-05	6.33E-05	5.24E-05	0.000385151	0.000179851	6.02E-05	0.000289232	0.000146371	0.000290056	0.000137715	5.16E-05	0.000260805	0.000193489	0.000367474	7.11E-05	9.97E-05	0.000115951	4.75E-05	0.000223829	0.000205942	9.08E-05	0.000425379	0.000210547	0.000134878	8.64E-05	0.000409893	0.000695335	0.000273607	0.000253644	0.000187341	0.000193176	0.000275806	0.000258353	0.000432412	0.00243751	0.000209389	5.00E-05	0.000264495	0.000144725	0.00010339	0.000112505	6.35E-05	6.76E-06	6.41E-06	9.57E-06	8.16E-06	5.51E-06
SRB	0.501593	0.324723	0.116746	0.138814	0.338572	1.48153	0.333273	0.132233	0.781262	0.136709	0.899659	0.518917	0.437988	0.916277	0.23667	1.43318	0.742424	0.166362	0.445385	0.0308158	0.486602	0.654824	0.228429	0.457712	0.287565	0.318153	1.51844	1.25333	2.17711	0.761048	0.96962	0.370054	0.279312	0.270487	0.596698	0.23968	10.1896	0.228528	0.164896	0.859034	0.495379	0.166951	0.169767	0.071259	0.0963615	0.107413	0.143876	0.10097	0.152987
MKD	5.43662	3.06986	3.79894	1.12097	2.06332	37.0357	1.71387	0.444979	5.2767	0.793525	10.3422	15.4952	15.6895	6.50695	1.05927	52.8543	1.79141	0.598567	1.45593	0.175727	4.97194	7.14221	1.17202	7.65827	2.22806	20.6733	45.6641	10.1905	16.9189	5.27776	6.42988	1.34885	1.28507	1.26856	2.89224	1.29604	28.7185	2.27917	3.83597	35.4455	2.11877	1.18468	0.675701	0.321767	0.277581	0.302056	0.3977	0.306149	0.387278
UKR	317.248	147.701	55.4544	17.3845	213.375	1569.56	133.843	40.9342	301.762	37.8041	324.635	63.9222	27.7893	1166.67	28.792	765.7	229.056	11.4567	122.775	2.15037	308.03	546.445	34.5858	88.1876	62.8694	23.4061	182.843	314.524	631.475	94.9477	221.711	85.7711	65.1259	28.7389	167.972	34.7217	4243.65	26.4994	98.7498	338.839	82.7164	39.0942	23.2127	16.4258	2.9289	24.7827	45.3024	7.32232	2.36858
DZA	1.36973	3.4088	0.0598795	0.0785997	1.22522	7.80901	0.563297	0.0399087	12.481	0.213388	32.1813	2.21788	0.225746	0.215574	0.411495	15.8576	0.0293832	0.725384	0.0191124	0.0378162	6.00452	0.851243	0.993149	0.145564	1.8473	0.269172	0.0909935	7.62575	24.8176	4.95267	2.50897	7.70154	0.98318	2.8957	1.265	1.41982	0.705023	0.72778	2.67644	3.41363	0.837567	0.388021	0.178355	0.15652	0.00803694	0.0122351	0.0156	0.0507667	0.00327731
AGO	25.5714	140.125	2.69184	1.02249	3.94141	137.393	23.5686	1.58686	428.064	6.6996	200.257	15.8522	2.30821	10.3632	13.3751	123.183	1.73554	4.2382	1.12392	0.904125	77.1908	20.1772	84.8358	3.98932	18.6613	4.41074	2.03563	86.9346	815.202	162.323	1850.59	70.3963	819.343	83.5523	29.0905	44.8113	50.3512	23.0534	14.17	13.9069	91.4687	10.8067	13.6632	35.0274	0.554045	0.485599	2.39097	1.70527	0.449637
BEN	6.60224	10.7147	0.58217	0.242119	1.09851	40.2005	6.47454	0.196368	30.1631	1.13003	99.8615	2.46	0.645521	2.26217	3.01192	112.821	0.366406	0.785901	0.212406	0.221273	10.5566	4.26028	15.1008	1.44816	5.22246	0.781182	0.434785	29.9296	68.2323	8.45867	8.73892	4.19353	3.22091	6.64637	227.869	7.72058	9.93578	3.28868	6.38829	3.3853	2.12627	1.25364	6.21243	3.46695	0.220485	0.101854	0.122185	3.08838	0.101579
BWA	0.0207078	0.035978	0.00187383	0.000703128	0.00341722	0.264711	0.0195385	0.0011696	0.046006	0.00606903	0.216152	0.0201307	0.0015891	0.0087917	0.00946399	0.190085	0.00148464	0.00355803	0.000830249	0.000554014	0.783063	0.0188352	0.0476995	0.00275691	0.0171511	0.00263165	0.00154207	0.409768	1.09339	0.101967	0.0390295	0.0194853	0.0157184	0.0101093	0.0239355	0.030337	0.0284896	0.0198017	0.0129271	0.0100264	0.00810232	0.232388	0.0101792	0.52394	0.000390762	0.000403433	0.000494889	0.000942868	0.00031772
BFA	0.0079621	0.00777733	0.0006967	0.000181986	0.00109327	0.0294997	0.0083061	0.000366812	0.0199418	0.0011075	0.0581887	0.00239963	0.000522175	0.00239103	0.00285322	0.0376736	0.000452562	0.000828482	0.000264251	0.000152347	0.00772857	0.00595608	0.00290015	0.00104903	0.00469799	0.000841372	0.000652702	0.0295047	0.0587613	0.0415186	0.011468	0.00573448	0.0030976	0.00369887	0.00837319	0.00913749	0.010954	0.00397082	0.00625465	0.00402366	0.00173917	0.00141309	0.00401991	0.00182061	0.000120577	0.000111277	0.000163105	0.00050863	0.000108337
BDI	4.91215	20.6328	0.231802	0.0963317	0.425743	45.571	3.16007	0.0936637	5.8244	0.933838	22.1301	37.2778	0.184536	1.4863	0.97847	8.50665	0.168411	0.439994	0.0974458	0.0720613	45.1443	5.33368	1.10644	0.991295	2.56268	0.311212	0.204642	11.7537	22.5983	3.99941	2.96842	1.98932	0.936477	0.843419	2.17906	2.97634	9.98956	1.20664	4.97727	1.12416	0.676502	0.822599	0.575868	0.898745	0.12631	0.0493993	0.0541723	2.54798	0.0353655
CMR	25.3664	256.551	6.06404	1.02367	18.8559	324.224	17.197	0.755127	224.35	6.40066	839.796	27.5231	17.5388	26.3124	28.8535	731.532	7.67567	5.71829	1.29963	0.668865	270.752	17.5131	81.8596	6.60886	14.4156	5.98504	6.06132	307.16	221.718	34.5205	71.7834	38.2729	62.2218	8.29265	28.2856	21.3783	30.4692	10.9875	63.1364	53.8577	40.1649	8.42331	191.959	31.9728	0.276665	0.429545	0.565418	1.8649	0.157081
CPV	0	0	0	0	0	0	0	0	0	0	0	0	0	0	0	0	0	0	0	0	0	0	0	0	0	0	0	0	0	0	0	0	0	0	0	0	0	0	0	0	0	0	0	0	0	0	0	0	0
CAF	61.5742	281.081	6.23072	5.46945	17.857	192.639	57.1571	2.76325	201.225	14.1275	558.709	18.9128	12.5462	26.1923	24.2703	199.051	4.43827	10.5263	3.36004	1.92883	39.7763	52.59	42.0449	9.88187	37.3783	10.0981	5.63272	77.0744	418.451	71.8862	70.8425	31.1752	21.6223	38.8308	54.4065	112.651	133.135	31.3843	32.7063	27.9873	27.9835	13.8064	27.6481	9.55669	1.54753	1.40561	1.64381	1.96201	1.52182
TCD	4.28222	3.56724	0.387405	0.112359	1.91125	9.72574	3.55883	0.160238	6.70243	0.716486	10.4063	0.739722	0.447101	1.67065	1.28215	8.05216	0.277947	0.642786	0.15469	0.103797	1.40018	3.67962	3.58074	0.433666	2.1517	0.553344	0.242674	2.78863	27.8575	3.33024	4.10659	1.244	1.12013	1.46046	2.6353	5.95102	8.90848	1.50249	0.688117	1.55504	0.865815	0.661119	0.848422	0.470208	0.0767211	0.0677377	0.0823876	0.943742	0.0709114
COG	20.3377	45.1243	1.22585	0.741782	10.9147	140.747	12.9709	0.490059	125.917	3.95989	238.039	17.2789	1.6229	5.27818	10.0179	269.463	0.86395	9.19149	0.505947	0.486822	348.668	14.8066	92.4134	3.50157	11.0456	2.17159	8.14392	73.3923	385.996	153.941	148.976	14.4196	178.898	23.1924	177.575	21.5617	39.2678	12.8276	13.5667	30.2506	105.145	14.684	44.8022	3.43797	0.290837	0.275024	0.408202	1.35989	0.171159
CIV	651.364	4192.22	46.8272	11.6525	311.17	3585.23	170.357	168.765	2720.84	68.4595	16238.2	806.222	560.014	290.543	152.567	3530.63	60.6553	85.6709	8.89094	7.36051	4110.61	1377.59	800.759	93.7204	160.854	81.9562	251.722	2545.18	4583.97	397.389	343.466	433.013	137.302	274.935	6772.77	211.845	1275.42	259.122	309.592	150.205	68.612	132.437	124.279	258.071	3.87044	3.65012	7.43674	769.906	1.07868
COD	74.0248	792.423	6.44662	5.78981	27.4177	427.233	60.0432	19.9623	164.259	557.92	338.765	37.0807	41.3678	26.3697	25.3425	664.49	4.62104	184.774	2.86761	1.89444	171.243	103.701	56.713	10.8233	49.6362	9.52387	5.90159	170.877	1510.43	423.421	176.815	42.4603	51.4281	33.4292	67.2338	98.2855	156.748	39.9725	151.665	39.9272	28.4304	20.2835	20.6018	31.6687	1.1706	1.35009	1.55872	2.07647	1.07276
DJI	0	0	0	0	0	0	0	0	0	0	0	0	0	0	0	0	0	0	0	0	0	0	0	0	0	0	0	0	0	0	0	0	0	0	0	0	0	0	0	0	0	0	0	0	0	0	0	0	0
DOM	8.07659	50.4153	0.369647	0.509921	1.23284	124.871	3.94008	0.182965	107.458	5.60993	76.2704	4.69823	0.52006	1.60979	2.35159	94.4798	0.270006	0.993032	0.169947	0.426726	131.649	3.35666	3.49405	0.915692	6.57938	0.624676	0.498124	177.34	921.881	58.2747	14.4238	59.2722	18.1399	8.70062	5.87861	28.0625	7.61349	6.51736	40.4392	4.08329	5.36362	2.856	3.5489	2.42036	0.0746928	3.01599	0.114892	0.245482	0.142055
ERI	0	0	0	0	0	0	0	0	0	0	0	0	0	0	0	0	0	0	0	0	0	0	0	0	0	0	0	0	0	0	0	0	0	0	0	0	0	0	0	0	0	0	0	0	0	0	0	0	0
ETH	52.7187	125.539	15.6216	4.12394	22.0052	662.821	52.7368	3.94446	229.963	27.3077	328.74	106.12	16.2924	31.8653	85.7351	401.474	9.21002	14.0083	4.04387	6.71052	187.147	89.8332	37.0415	50.5925	53.5834	10.2567	22.5881	286.086	755.059	901.801	137.062	116.768	56.0872	51.5087	210.319	90.8243	162.186	81.0376	93.811	101.913	39.2754	53.4733	78.6757	36.5361	2.6194	2.85889	3.26906	5.5022	2.82139
GAB	11.6248	21.8386	0.948325	0.88076	3.59138	50.2935	6.70723	0.397372	50.3034	2.37292	253.983	14.3051	1.04895	2.56578	13.1638	115.6	0.468597	1.44682	0.276545	0.275425	52.0613	11.8637	23.7933	2.47528	5.82529	1.19264	0.798051	45.899	260.827	24.3485	140.547	12.7861	44.1675	5.00133	27.8195	10.7712	9.38908	5.86723	7.93898	26.506	8.7919	5.16052	5.94426	20.912	0.158944	0.173315	0.271685	0.465807	0.126644
GMB	0.294957	0.692173	0.172956	0.00913735	0.0361894	1.10662	0.258478	0.0124691	0.620285	0.0571616	1.50221	0.0575422	0.0190632	0.114017	0.12892	0.888415	0.0187421	0.0485421	0.0141357	0.00865058	0.580272	0.185245	0.0777295	0.040233	0.167865	0.0336608	0.0221034	1.32588	1.72624	0.510694	1.57062	0.122016	0.0979974	0.164188	2.19706	0.605646	0.460627	0.122398	0.0766142	0.101139	0.0859955	0.0625417	0.0607906	0.0774428	0.00473661	0.00412381	0.00494586	0.00816365	0.00400715
GHA	257.213	786.558	22.7517	6.23988	56.4081	1383.58	145.87	47.2449	1441.36	227.143	2491.32	131.797	77.6067	43.2542	250.253	1345.81	9.06447	184.878	5.9323	2.63986	1370.96	143.699	262.845	42.0265	456.188	19.4986	27.7314	2826.25	2341.02	2247.18	576.945	283.254	117.435	92.8434	545.619	123.924	255.669	156.151	538.365	141.827	94.9901	92.2628	59.5605	107.771	1.42511	3.76641	2.49013	44.3211	0.876745
GIN	36.6901	214.467	1.79397	0.708661	7.58991	90.9459	16.3611	0.958777	151.736	4.45998	198.236	15.5528	5.99639	14.192	139.302	105.98	1.41408	2.66444	0.99863	1.50552	31.3787	22.2301	7.48058	5.72745	12.0538	3.30337	1.99167	47.1541	203.902	66.7526	32.0683	28.1481	89.3743	7.14709	34.519	23.7421	121.352	7.97532	10.0988	11.1871	6.4393	6.76444	5.51227	3.11818	0.344562	0.421495	52.4967	0.629393	0.26691
KEN	24.9425	108.202	3.32957	2.27543	9.34741	339.132	33.1735	3.64571	116.814	18.3267	220.282	37.778	2.81764	7.91073	36.3446	250.252	2.71977	7.11598	0.874782	1.66396	763.139	61.0492	22.5827	10.4032	50.3363	3.35631	8.30543	1149.04	390.514	240.591	86.2595	51.9645	27.0201	17.0579	753.028	22.5666	311.627	46.0313	47.3082	103.134	11.7731	24.5804	75.4694	24.799	93.4619	0.900043	0.944784	7.59288	0.391782
LSO	0.0057962	0.00662432	0.00057444	0.000198022	0.000744675	0.017023	0.00506431	0.000242444	0.011409	0.00114674	0.0857092	0.00140547	0.000393198	0.00228888	0.00234096	0.0138457	0.000394345	0.0010388	0.000262329	0.000182676	0.00290594	0.00444886	0.00118509	0.000795074	0.00329601	0.000731758	0.000417161	0.00886184	0.0655638	0.00606117	0.00787183	0.00417871	0.00211254	0.00282152	0.00541417	0.00777284	0.00951709	0.003086	0.00194801	0.00255884	0.0014783	0.00120222	0.00129641	0.153335	0.00014659	0.000131428	0.000152658	0.000214198	0.000120171
LBR	58.8497	109.82	5.79715	2.50381	17.6856	597.678	73.2656	2.82389	181.544	29.8451	226.141	57.1851	23.7872	28.6956	29.1169	369.867	5.12653	9.77977	3.09024	2.13021	44.6552	132.088	22.2857	10.6966	42.5941	7.37958	5.28421	121.036	452.246	139.895	145.066	29.9861	206.793	32.3289	295.854	76.2544	100.575	35.1648	55.2019	51.9525	19.0843	1434.03	20.8716	13.1794	2.42966	2.08039	1.99367	266.1	1.9673
LBY	0.0262921	0.0141689	0.000943886	0.00625706	0.00276006	0.220175	0.00468223	0.000796617	0.132748	0.0019614	0.0590987	0.0399754	0.00933022	0.00304914	0.00298381	0.456515	0.000412933	0.00119999	0.000247803	0.00561357	0.0342386	0.00675253	0.0227183	0.00236173	0.0128192	0.00254332	0.00106885	0.114588	0.0755378	0.0774678	0.0153479	0.00437294	0.00950054	0.00429946	0.0203472	0.00775404	0.00916295	0.00410279	0.0982102	0.101498	0.00304694	0.00286735	0.00423596	0.00106353	8.87E-05	0.000141432	0.000294549	0.000275672	4.62E-05
MDG	157.051	112.832	7.93146	1.5902	19.1969	926.964	39.705	210.933	134.876	22.7956	1873.2	35.55	12.6261	14.4619	12.0051	283.484	2.1949	5.81306	2.24822	0.815288	203.317	43.4189	24.7072	9.89044	37.9821	7.30362	6.08732	550.615	2443.97	631.943	195.878	254.127	40.3748	97.0281	131.801	59.4559	67.4425	52.7289	45.9136	33.7693	38.3591	18.297	55.3535	17.7726	0.436103	0.551128	0.686798	18.1081	0.236777
MWI	6.29727	16.8474	1.32824	0.412081	3.78453	62.4272	10.2751	0.229895	24.2103	2.33029	55.5261	10.758	1.92177	5.24541	4.56089	27.7927	0.600034	2.67019	0.286417	0.238561	181.817	24.8032	9.87317	2.02386	10.4232	0.931792	0.99227	281.523	98.6823	75.8353	21.237	9.29777	4.07506	2.88378	21.7908	7.3442	50.3919	15.3624	13.4336	12.8092	3.28069	6.18913	6.21375	86.6085	0.193207	0.19802	0.432085	0.459665	0.175613
MLI	0.292101	0.304034	0.0257854	0.00743199	0.10288	0.855909	0.335044	0.0172404	0.974431	0.0485421	2.61683	0.16915	0.0187478	0.0994383	0.14523	0.953687	0.0177828	0.0524804	0.00955279	0.00584721	0.352722	0.228925	0.126675	0.0431245	0.148878	0.0317367	0.0277172	0.608909	2.1966	0.72061	0.512407	0.427337	0.233936	0.148901	1.03695	0.377241	0.522916	0.15847	0.123364	0.11072	0.142821	0.105894	0.112822	0.0818798	0.00500512	0.00433784	0.00619701	0.117938	0.00421561
MRT	0	0	0	0	0	0	0	0	0	0	0	0	0	0	0	0	0	0	0	0	0	0	0	0	0	0	0	0	0	0	0	0	0	0	0	0	0	0	0	0	0	0	0	0	0	0	0	0	0
MUS	0.267297	0.56842	0.0179333	0.0165928	0.0620546	2.00222	0.187151	0.014638	1.46472	0.0982226	11.6923	0.1517	0.0336202	0.0734802	0.322136	1.91604	0.0127747	0.0514135	0.0078368	0.0173681	0.512892	0.17357	0.749525	0.0592812	0.470857	0.0386213	0.0205374	15.1308	3.16354	4.0497	2.08367	0.617484	0.329759	1.93284	1.06702	0.54904	0.353833	0.380018	0.63609	0.120824	0.119121	0.138013	1.13663	0.28055	0.00610678	0.0058632	0.00711596	0.0187841	0.00379348
MAR	3.74321	11.045	0.553154	0.260422	2.45698	25.6742	1.75925	0.36381	106.263	3.62263	150.217	5.92847	1.09083	1.5006	3.87977	37.9579	2.26434	2.11755	0.11035	0.492312	20.1184	2.71111	20.2317	0.601333	3.58901	0.482197	1.02182	26.3046	23.928	29.1755	5.26034	10.5067	5.16706	2.59832	7.66441	2.02023	23.9075	3.87321	6.68137	13.8173	1.04153	3.02264	0.451196	0.71176	0.0212455	0.0414129	0.067385	0.101645	0.00659421
MOZ	177.694	234.954	13.9152	4.1794	28.2305	711.608	134.559	5.03019	678.463	29.3016	598.448	41.0916	8.76567	50.9395	90.6868	411.665	9.52181	17.9891	5.6269	3.77134	668.092	169.321	1924.51	17.906	91.2894	16.2963	13.1489	380.734	1417.11	825.244	483.647	88.9435	211.579	75.6274	1720.92	190.831	366.516	171.409	63.642	129.648	40.0235	36.027	171.576	1674.99	3.17484	2.17471	3.71172	5.28261	1.93149
NAM	0.183908	0.290765	0.0345154	0.00498596	0.0598711	3.1729	0.113546	0.00390652	8.59069	0.0296082	1.13076	0.104826	0.0205339	0.05796	0.0589682	1.03257	0.0160983	0.028032	0.0166146	0.0032933	0.43221	0.131452	0.515431	0.0552127	0.0943467	0.0191499	0.0189695	1.39245	6.28954	2.64894	1.07599	0.611958	0.225343	0.228561	0.0864771	0.177267	0.459761	0.290946	0.33937	0.0602789	0.052299	0.316926	0.0721255	1.89137	0.00210099	0.00280083	0.00534582	0.00464761	0.00138574
NER	0	0	0	0	0	0	0	0	0	0	0	0	0	0	0	0	0	0	0	0	0	0	0	0	0	0	0	0	0	0	0	0	0	0	0	0	0	0	0	0	0	0	0	0	0	0	0	0	0
NGA	47.9601	58.2243	1.49421	0.573243	5.98049	117.494	14.8801	2.11893	192.239	3.66332	225.601	99.5159	5.55565	4.70326	13.5482	125.656	1.06858	2.96733	0.43971	1.31467	98.4351	14.785	92.2216	1.97378	121.355	1.52701	1.40963	177.138	547.475	248.979	130.909	127.699	49.9287	68.533	210.958	26.7952	19.3628	70.1269	177.528	16.6525	25.0217	6.54561	155.737	107.281	0.193945	0.214131	0.36991	1.27771	0.108146
RWA	3.09756	11.2903	0.191194	0.0834101	0.436593	18.6154	2.87891	0.0818503	7.19429	0.47745	8.53233	1.23387	0.171471	1.09176	0.865437	6.71481	0.206466	0.405403	0.0874782	0.0914303	36.643	2.81368	0.805911	3.99711	2.2589	0.251053	0.166196	13.93	18.6731	2.08708	2.69462	1.75311	0.788812	1.04617	2.60232	2.60996	3.51929	1.33409	0.801489	1.04008	0.480261	0.505324	0.436493	1.75722	0.0568614	0.0560461	0.0651213	0.0835447	0.0491738
STP	0	0	0	0	0	0	0	0	0	0	0	0	0	0	0	0	0	0	0	0	0	0	0	0	0	0	0	0	0	0	0	0	0	0	0	0	0	0	0	0	0	0	0	0	0	0	0	0	0
SEN	0.206382	1.05848	0.0189059	0.00660759	0.0352353	1.59664	0.185666	0.00798133	1.44428	0.053155	8.02216	0.547591	0.0168154	0.0695539	0.0865777	4.07812	0.0119489	0.0382982	0.00821166	0.0077943	1.19289	0.145482	0.346811	0.030937	0.187666	0.031192	0.0149025	1.6961	1.60159	0.560632	0.314952	0.229511	0.151247	0.0851879	1.61652	0.518638	0.321241	0.0940715	0.356004	0.104466	0.0437852	0.0693001	0.0435448	0.0378533	0.00304696	0.00542974	0.00537365	0.00945729	0.00204704
SYC	0	0	0	0	0	0	0	0	0	0	0	0	0	0	0	0	0	0	0	0	0	0	0	0	0	0	0	0	0	0	0	0	0	0	0	0	0	0	0	0	0	0	0	0	0	0	0	0	0
SLE	15.1408	15.8594	1.06783	0.306244	30.5595	48.5673	9.46272	0.565222	20.6367	1.9934	111.335	45.6109	6.87209	4.38528	5.40886	295.173	0.697309	1.15026	0.409581	0.373796	5.02556	20.4241	1.79075	1.31816	15.6705	1.6672	4.80466	19.0382	128.201	31.1418	16.8345	122.076	4.28282	4.09452	40.9602	15.8063	22.2716	4.14151	3.40763	4.97764	2.68436	2.56668	1.87285	4.08726	0.18002	0.182648	0.21161	0.352822	0.150144
SOM	0.453276	0.44848	0.0462346	0.0190981	0.0605351	1.43686	0.481185	0.0221991	0.922713	0.105926	1.6987	0.144627	0.0463236	0.189915	0.300925	1.16233	0.0279813	0.0791652	0.0193728	0.119556	0.584118	0.296809	0.0941675	0.0652844	0.284837	0.0526152	0.0428258	1.37488	4.5872	1.29244	1.35233	0.3734	0.76331	0.302686	2.02563	0.645585	0.784062	0.376768	0.244172	0.256299	0.197548	0.365067	0.24672	0.139544	0.0146348	0.0095871	0.0125561	0.0611572	0.00845029
SDS	0	0	0	0	0	0	0	0	0	0	0	0	0	0	0	0	0	0	0	0	0	0	0	0	0	0	0	0	0	0	0	0	0	0	0	0	0	0	0	0	0	0	0	0	0	0	0	0	0
SUD	0	0	0	0	0	0	0	0	0	0	0	0	0	0	0	0	0	0	0	0	0	0	0	0	0	0	0	0	0	0	0	0	0	0	0	0	0	0	0	0	0	0	0	0	0	0	0	0	0
SWZ	9.2895	9.75534	0.732363	0.521404	1.78884	26.7419	5.3772	0.347142	97.7406	7.68397	54.1303	13.805	1.34966	2.89243	6.62557	80.2379	0.990509	1.97428	0.353584	0.480934	13.0241	6.23638	12.578	3.56744	5.04037	0.931343	1.05551	55.3278	299.566	202.911	27.0166	8.97163	60.9312	6.45238	63.6418	24.2792	9.99717	18.4997	3.67193	6.14288	10.9011	2.77703	101.246	23.1282	2.70745	0.416833	0.503545	2.2553	0.55982
TGO	4.66184	16.833	0.720648	0.216994	0.849605	69.5463	8.29207	0.161118	31.2489	1.05485	135.929	3.14571	2.06025	1.69185	2.00841	41.8384	0.253036	0.7989	0.167272	0.139168	17.5463	7.83888	11.3754	1.21314	3.35038	0.621911	0.614201	22.9426	54.1832	127.097	7.52514	10.1835	2.31705	2.26071	5.43082	5.32624	38.0425	2.31874	15.1667	2.05658	1.66696	1.18245	6.35057	5.28045	0.0902332	0.0842864	0.105054	11.1012	0.0649637
TUN	0.568642	0.68369	0.0196706	0.0521218	0.0786183	2.38122	0.116551	0.00543241	3.0376	0.0580037	8.38961	0.233143	0.347785	0.0927436	0.12868	6.47568	0.00840568	0.204638	0.00555671	0.0300413	0.659668	0.216515	0.404816	0.0622008	0.241119	0.0312927	0.03438	1.2255	1.52269	0.920258	0.245388	0.175784	0.121122	0.112147	0.407826	0.106078	0.197463	0.128315	0.52152	0.326484	0.0655546	0.13215	0.0822808	0.0604731	0.00285259	0.00358709	0.00424237	0.0212248	0.000856071
UGA	17.9189	87.0961	9.30134	1.35742	14.5271	169.651	22.5596	0.433197	114.668	4.34303	102.676	16.4958	5.71768	27.0612	6.03135	162.383	3.49345	3.57135	1.30395	0.477322	331.888	72.7307	30.8306	9.89228	14.1141	10.0686	3.05224	217.733	148.862	106.348	23.9812	20.3792	7.71792	5.01	24.2629	13.835	58.1844	50.8029	88.7091	8.25928	6.10387	7.2077	4.82378	3.48511	0.778848	0.292749	0.303733	73.8036	0.17788
TZA	164.003	468.693	30.9776	6.89367	34.5307	2019.01	128.738	3.34511	690.075	50.7683	1284.06	315.775	11.8387	100.213	66.0121	978.841	5.31348	23.5129	3.18975	3.29273	3456.77	184.692	108.599	42.03	82.3281	12.2169	16.9051	1303.53	1373.31	5037.62	309.455	103.957	166.079	72.2428	3330.8	107.794	184.144	214.141	139.189	148.059	42.8924	77.7229	153.418	78.5556	9.54464	8.32092	4.4235	23.4645	2.02659
ZMB	62.5698	162.815	9.70524	19.92	15.9877	733.306	56.9505	3.67577	281.21	152.17	456.487	47.8367	4.82405	20.0809	112.609	271.603	3.88016	9.92897	2.91582	1.68252	869.045	45.9775	188.407	8.98228	51.2757	7.69846	4.66742	1270.69	1057.78	566.443	261.084	58.1286	46.6839	151.4	991.07	71.2503	107.418	58.9033	50.1306	34.6496	37.6774	42.9803	36.1687	889.955	1.10224	1.481	1.80316	5.57623	40.4986
ZWE	13.6519	33.4976	4.02697	0.636255	4.72965	133.329	13.6076	0.659383	125.753	7.60528	76.523	8.52476	2.33927	3.69228	10.6509	48.7179	1.14217	6.79372	3.53756	0.413687	171.011	11.4248	21.8279	3.45436	19.7905	1.40214	1.91794	313.578	158.307	88.6932	35.7321	10.8442	13.0486	10.7539	31.4972	17.7686	32.5344	24.1911	15.4461	12.3203	7.4373	15.1168	6.41495	418.065	0.285808	1.05779	0.991845	1.60704	0.247166
BHR	0	0	0	0	0	0	0	0	0	0	0	0	0	0	0	0	0	0	0	0	0	0	0	0	0	0	0	0	0	0	0	0	0	0	0	0	0	0	0	0	0	0	0	0	0	0	0	0	0
EGY	0.0271332	0.0538876	0.00708434	0.0783837	0.0149032	0.317808	0.0161493	0.00103372	0.168819	0.0121728	0.222681	0.103153	0.00419603	0.00888586	0.0115983	0.34274	0.00155534	0.00272953	0.00220729	0.0235857	0.137284	0.0200697	0.0394104	0.0160358	0.0387827	0.00656437	0.00320802	0.28598	0.425291	0.0873961	0.0868245	0.0373046	0.0640386	0.0217302	0.0557786	0.0258297	0.0655214	0.0168128	0.0336882	0.0795146	0.0114461	0.0206946	0.0937456	0.0257257	0.000257889	0.000489536	0.000682774	0.00109115	6.63E-05
IRN	0.588337	0.74136	0.105188	0.0556693	0.174693	4.31933	0.427536	0.0350923	3.32924	0.217705	3.99489	1.34211	0.061617	0.367791	0.270156	4.54756	0.0598161	0.461352	0.0314928	0.0708743	1.29564	0.464833	0.510972	0.178812	1.50769	0.0735261	0.0870236	1.65567	7.1845	3.61433	3.72253	0.740992	11.6033	0.4089	2.84785	0.824594	1.90886	0.575653	0.946192	1.55227	0.528693	0.383691	0.503329	1.2166	1.22214	0.827008	1.00878	0.135676	0.0101367
IRQ	0.0147774	0.00389581	0.000365725	0.000230244	0.00185771	0.0143122	0.00216203	0.000622807	0.0340236	0.00072918	0.0267224	0.00548324	0.00224987	0.0011702	0.00165919	0.0413112	0.000148182	0.000749139	0.000100036	0.000462149	0.0148801	0.00204866	0.00445915	0.000557443	0.00129509	0.000467048	0.000394425	0.00804508	0.104613	0.0146065	0.0243959	0.031329	0.0384435	0.00564027	0.00526103	0.0044905	0.00746238	0.00492608	0.00150651	0.00258326	0.00381408	0.000968551	0.0020124	0.000727988	0.000103243	9.17E-05	0.000247205	0.00022036	6.05E-05
ISR	0.207059	0.734823	0.0392142	0.0956847	0.134999	2.15542	0.179558	0.0129238	1.04391	0.194948	1.82909	0.447268	0.0452806	0.126787	0.24471	1.4384	0.018137	0.0569747	0.0281684	0.0170251	1.08664	0.32172	0.0941341	0.13363	0.293891	0.0314337	0.0457612	2.25146	4.92207	0.556123	0.554423	0.551188	0.879004	0.162416	0.298132	0.28731	0.442006	0.260246	0.605465	0.617945	0.117921	0.301561	0.0542973	0.130958	0.00205832	0.00539865	0.00731171	0.00646697	0.000754218
JOR	0	0	0	0	0	0	0	0	0	0	0	0	0	0	0	0	0	0	0	0	0	0	0	0	0	0	0	0	0	0	0	0	0	0	0	0	0	0	0	0	0	0	0	0	0	0	0	0	0
KWT	0	0	0	0	0	0	0	0	0	0	0	0	0	0	0	0	0	0	0	0	0	0	0	0	0	0	0	0	0	0	0	0	0	0	0	0	0	0	0	0	0	0	0	0	0	0	0	0	0
LBN	0.174548	0.338481	0.0394886	0.0781958	0.0295162	0.915551	0.211202	0.00719579	0.461843	0.0370315	1.009	0.293323	0.0167593	0.061029	0.0859137	0.680176	0.00907455	0.0273363	0.00700907	0.0152276	0.138514	0.127448	0.0489006	0.110682	0.138626	0.018504	0.00973089	0.611763	2.53043	0.221062	0.185005	0.25831	0.101571	0.221092	0.132737	0.2298	0.521032	0.157737	1.31498	1.11972	0.0389039	0.102735	0.0470262	0.0241406	0.00422822	0.0124843	0.00875345	0.01543	0.0014829
PSE	0.00644786	0.00671306	0.000451388	0.000136432	0.000348944	0.0223417	0.00472229	0.000233694	0.0101083	0.000948901	0.0211254	0.000672866	0.000164184	0.00172053	0.0021374	0.02454	0.000281111	0.00102803	0.000156069	0.000482257	0.00585821	0.00307605	0.00048935	0.0003942	0.00156924	0.00283724	0.000275588	0.00447868	0.0718222	0.00448341	0.0043893	0.00187299	0.0136077	0.00189217	0.00310755	0.00815719	0.0148921	0.00137122	0.00202909	0.0022138	0.00086153	0.000752801	0.000988864	0.000459528	5.29E-05	4.69E-05	6.73E-05	8.65E-05	3.74E-05
OMN	0	0	0	0	0	0	0	0	0	0	0	0	0	0	0	0	0	0	0	0	0	0	0	0	0	0	0	0	0	0	0	0	0	0	0	0	0	0	0	0	0	0	0	0	0	0	0	0	0
QAT	0	0	0	0	0	0	0	0	0	0	0	0	0	0	0	0	0	0	0	0	0	0	0	0	0	0	0	0	0	0	0	0	0	0	0	0	0	0	0	0	0	0	0	0	0	0	0	0	0
SAU	0	0	0	0	0	0	0	0	0	0	0	0	0	0	0	0	0	0	0	0	0	0	0	0	0	0	0	0	0	0	0	0	0	0	0	0	0	0	0	0	0	0	0	0	0	0	0	0	0
SYR	0.109226	0.116278	0.0954767	0.067487	0.0325658	1.1928	0.059556	0.002664	0.379081	0.0175257	0.634587	0.214731	0.025808	0.0244698	0.029255	0.880315	0.00409991	0.0128962	0.00221971	0.00774754	0.777713	0.0473878	0.152444	0.0796933	0.0528252	0.00775933	0.00784842	0.4308	1.52835	0.193747	0.166984	0.151742	1.5306	0.257251	0.340042	0.181751	0.364869	0.0825629	0.0857697	0.800587	0.0417983	0.0239113	0.0477361	0.0190151	0.00130606	0.00515006	0.0186884	0.0140025	0.000429942
ARE	0	0	0	0	0	0	0	0	0	0	0	0	0	0	0	0	0	0	0	0	0	0	0	0	0	0	0	0	0	0	0	0	0	0	0	0	0	0	0	0	0	0	0	0	0	0	0	0	0
YEM	0	0	0	0	0	0	0	0	0	0	0	0	0	0	0	0	0	0	0	0	0	0	0	0	0	0	0	0	0	0	0	0	0	0	0	0	0	0	0	0	0	0	0	0	0	0	0	0	0
tot	21551.5	43299.5	4557.47	1377.99	11120.3	165923	21465.7	11264.2	85904.4	70624	130004	17857.8	4687.38	14214	18807.3	104100	8453.66	3517.1	12432.9	469.721	78928.6	34234.2	27457.3	9623.43	87381.9	3751.66	5114	175566	2.06415e+06	225772	346687	409357	67418	2.66893e+06	87662.7	183688	305821	85245.7	20385.3	38375.3	48294.2	36700.2	550191	36571	695.553	1556.49	3424.35	8412.04	151.933
[truncated: 140 more columns]

## Sheet: 2003
GID	AUT	BEL	BGR	CYP	CZE	DEU	DNK	EST	ESP	FIN	FRA	GRC	HRV	HUN	IRL	ITA	LTU	LUX	LVA	MLT	NLD	POL	PRT	ROU	SWE	SVN	SVK	GBR	USA	JPN	CHN	CAN	KOR	BRA	IND	MEX	RUS	AUS	CHE	TUR	TWN	NOR	IDN	ZAF	AFG	ARM	AZE	BGD	BTN
AUT	6617.61	53.107	8.64684	2.30359	86.812	1422.65	32.0479	2.85441	197.493	23.4609	420.019	99.8919	71.6151	135.391	29.9529	1638.8	5.42954	4.6038	3.82443	2.68035	103.133	120.705	36.4174	52.624	63.7625	81.4988	35.4288	386.89	577.795	321.409	117.07	83.8265	32.1103	18.9125	28.1141	38.8001	105.679	44.8833	211.507	88.3375	33.1989	31.7195	8.0059	7.14723	0.530696	0.907114	1.40093	1.10819	0.388841
BEL	11.0806	590.329	0.63986	0.399516	4.24237	155.354	8.2112	0.438481	50.0997	5.23624	277.666	10.5398	1.56621	4.0397	10.5353	71.6197	0.728216	0.988241	0.431002	0.283678	100.546	11.6898	8.95203	2.68216	15.1755	1.14441	1.32111	154.733	109.536	15.3093	26.8328	13.5668	8.39367	4.43835	8.1392	7.38233	12.2862	11.8143	12.8094	9.75028	2.41844	7.41457	1.94643	1.99352	0.0924711	0.179969	0.1803	0.26791	0.017944
BGR	40.8809	17.2698	2515.56	4.24586	23.4653	169.735	7.94564	0.653072	39.2934	5.80871	99.6596	331.362	6.62121	29.1578	8.0558	248.877	1.50038	1.03616	1.22502	0.778677	26.9853	29.3051	8.76264	45.8607	21.2913	8.54487	5.65096	87.3116	127.431	18.9647	26.6444	12.4736	12.2183	6.93791	10.3953	7.7239	32.0758	10.8635	11.3407	265.996	9.58067	9.46934	5.63691	1.08886	1.64483	4.4052	3.7524	0.459715	0.27033
CYP	0.0496386	0.0653966	0.0179894	8.98675	0.0360819	0.170011	0.0400735	0.00957639	0.0899718	0.0398824	0.0968443	0.293012	0.0208608	0.030788	0.0509587	0.130171	0.0066696	0.0167771	0.0274487	0.00516091	0.059631	0.0413873	0.0455899	0.0273629	0.068755	0.0181224	0.0197459	0.385545	0.235373	0.0809531	0.108906	0.0596392	0.0585844	0.048181	0.0685064	0.0547176	0.0976173	0.06201	0.0500856	0.0981073	0.0527276	0.0586317	0.034371	0.0249539	0.00227408	0.022235	0.00207916	0.00474983	0.000909654
CZE	174.55	20.6903	4.40793	0.507839	2062.14	482.747	12.6878	0.947715	38.8071	7.55929	81.4312	25.4775	12.016	43.4047	5.28853	143.979	2.82471	1.3579	2.36359	0.285514	32.031	82.7978	6.67173	25.6052	19.9549	14.1474	66.8809	98.6346	101.708	25.7057	23.2466	8.7393	6.32787	3.68679	6.99313	5.24069	48.9632	20.8741	19.3879	10.3713	7.00067	10.5046	2.4401	0.932531	0.249702	0.281003	0.670513	0.352486	0.0681605
DEU	124.623	80.0722	4.56446	1.50215	47.1983	3203.4	50.3285	2.48074	136.538	20.8142	380.195	52.5068	10.6659	34.4595	18.8148	251.805	4.10428	6.08632	3.3551	1.005	123.054	93.2187	20.7172	17.0002	55.1698	10.7177	12.549	307.599	342.967	56.865	85.886	31.0394	20.9011	15.4045	22.9258	20.2569	67.5245	32.1816	98.5046	42.7142	22.9254	25.7232	5.67976	5.18353	0.32877	0.380984	0.858654	0.729158	0.042143
DNK	12.7922	10.052	0.427458	0.351444	4.88089	171.452	643.702	0.769891	22.9812	12.7674	55.0217	4.83351	1.9729	5.21752	10.406	30.0382	1.18424	0.992217	1.08164	0.175368	29.1225	16.6699	4.37888	1.45837	88.0442	1.00868	1.29988	97.0879	60.6709	17.3128	19.7641	7.42686	5.1621	2.12576	3.71643	2.81565	7.14467	8.02743	13.0634	3.83357	5.11757	56.9275	1.08897	0.860294	0.074964	0.0631504	0.169936	0.221935	0.0189555
EST	21.7498	25.2917	1.75657	0.890259	21.3202	355.955	142.336	2293.12	49.948	359.143	116.419	16.9285	5.65135	14.244	62.6756	106.845	15.1028	1.79734	28.8357	0.770946	63.6548	62.4974	12.4954	4.33091	318.916	3.26356	4.05586	394.851	204.761	54.702	47.3113	15.1667	21.2431	6.43228	11.0691	7.87735	111.576	14.9795	17.6858	10.9906	15.8202	217.537	3.95346	1.87609	0.284566	0.383272	1.26998	0.498955	0.225394
ESP	39.4219	81.9859	5.14204	3.03549	16.1407	414.036	23.8688	1.51573	12529.4	19.9008	996.66	81.0636	9.00655	16.6343	38.1255	458.984	3.01992	6.68778	2.83627	3.20239	108.572	48.9481	634.011	14.5111	47.9935	7.87865	5.4695	486.941	580.724	81.0366	98.8136	44.1994	32.0311	32.9205	27.7407	84.7611	67.7242	42.5131	47.9301	65.0072	22.8193	30.0684	8.82205	8.8165	0.406879	0.60559	1.01803	1.47951	0.0935169
FIN	571.725	860.675	39.8562	20.7572	213.911	5551.68	1022.31	155.519	2691.66	34839.4	3737.14	755.159	74.947	253.741	484.355	2483.89	71.689	63.4002	91.2099	7.80204	1409.05	838.565	359.694	103.804	1732.61	60.468	110.842	7126.56	5998.88	2499.79	1343.14	572.795	378.778	238.919	391.698	313.078	1615.03	777.646	524.1	546.136	367.57	1013.62	82.2258	76.177	4.58818	5.71218	11.3195	11.6907	0.630395
FRA	99.8268	380.352	7.07266	3.35709	39.7263	1083.18	61.1001	2.45438	974.418	34.4427	12795.9	114.197	17.3761	36.7534	60.2998	975.392	4.27537	29.2034	3.01192	3.08484	289.901	102.574	130.553	30.5407	84.4114	14.9336	10.9291	1075.07	933.645	149.9	180.714	87.2115	63.5909	53.3374	64.1063	50.4604	108.848	96.4339	219.881	95.9399	47.4764	37.1753	16.5227	17.3075	0.737231	1.01054	1.64246	2.44141	0.0906953
GRC	3.95916	3.75407	8.52604	5.70698	1.62993	24.8101	1.99259	0.238791	9.60846	2.78682	14.3172	1239.82	1.45625	2.1501	1.51663	34.5715	0.323202	0.377469	0.176547	0.849078	5.69785	3.78637	2.51892	7.18779	3.83987	0.857469	0.58656	18.6618	23.519	5.01163	6.03152	3.54568	3.09325	1.16196	2.61717	1.9362	9.2945	4.10052	3.00783	16.6103	1.20766	2.43354	0.900757	0.76519	0.301384	1.57397	0.426017	0.101338	0.0235059
HRV	23.0347	6.31154	1.01773	0.410184	5.56346	64.852	4.02243	0.232882	15.5142	3.1	29.2883	7.56456	708.663	16.478	2.42142	179.382	0.418251	0.688201	0.828195	0.343213	6.86388	7.8836	2.53998	5.82228	8.30898	62.6323	2.19821	19.4275	29.3934	6.32712	8.58463	4.39036	3.15871	2.11255	3.39194	2.8774	6.59823	3.51961	7.60238	7.9813	2.74507	3.53974	1.30943	0.68068	0.0615858	0.0790236	0.655701	0.0790005	0.03993
HUN	221.266	28.4733	11.6632	0.928829	69.3368	516.383	73.1283	3.41934	68.4886	12.28	156.462	39.7026	68.6207	2781.47	7.713	313.944	5.35031	2.38102	4.15983	0.480548	60.8687	117.707	9.67349	122.737	37.3254	36.6924	46.8401	109.872	141.478	28.4366	39.1488	13.4022	10.1706	6.87168	28.5717	9.42833	124.069	17.2753	31.299	42.4514	11.8472	20.8459	4.38997	2.42466	0.2554	0.4249	1.14987	0.539967	0.149064
IRL	7.09489	15.5869	0.567919	0.425348	4.56404	93.5128	9.87193	0.486519	37.1057	6.22581	62.5394	5.38906	1.50292	7.29472	896.681	50.028	0.48741	1.58085	0.48093	0.322812	27.6859	8.43075	4.0725	1.8202	25.5776	0.893149	2.61502	547.454	139.522	17.4335	26.3563	9.62601	10.2996	3.75807	10.2412	5.73428	13.7789	10.4692	11.9097	6.55159	6.40583	11.9827	2.33094	3.25726	0.172175	0.112104	0.288871	0.27681	0.0846153
ITA	16.7288	11.7754	1.67177	0.678195	4.66718	103.661	5.13905	0.30325	47.4819	3.25977	112.496	25.3375	5.85383	5.3479	3.6239	1959.24	0.593933	0.916567	0.533065	0.887124	15.0734	10.7868	7.9656	8.01615	8.19619	5.39855	1.74794	64.9128	102.3	17.1857	16.7711	9.07432	6.37475	4.19105	4.30771	5.92369	13.1484	10.7654	19.3415	13.6228	4.37672	3.82089	1.25798	1.27461	0.0571932	0.184681	0.232183	0.231014	0.0146143
LTU	40.4821	92.6529	3.65677	1.68901	24.4552	759.701	211.668	50.6799	64.3094	56.2708	171.579	18.8678	6.09839	22.6256	27.9167	142.076	4285.13	8.50987	152.013	0.926093	102.06	143.334	15.8585	6.42117	274.201	5.06237	7.72391	491.508	516.351	60.1655	43.0062	64.2082	13.8246	7.84997	14.6893	11.7507	325.978	27.8086	89.9475	14.4893	13.4208	209.835	5.76676	2.8763	0.764756	0.984197	2.99636	1.00776	0.81976
LUX	0.862266	0.851025	0.0580969	0.0232977	0.355915	10.8416	0.582721	0.0245769	3.68011	0.375889	20.6815	0.831193	0.126316	0.330244	0.649428	5.69443	0.0369425	8.74987	0.0293198	0.0198022	5.90369	0.95576	0.699554	0.239551	1.11797	0.0992407	0.1114	10.1192	7.33459	1.01983	2.13207	0.793472	0.571701	0.345114	0.691868	0.607454	0.951638	0.864088	0.938004	0.962159	0.225186	0.539871	0.148612	0.255552	0.0141088	0.0293397	0.0232855	0.0239789	0.0118904
LVA	117.668	145.143	8.9489	4.25782	49.3686	1500.79	523.449	138.987	288.403	307.947	525.511	63.1551	19.6031	59.23	249.205	322.769	133.665	13.1206	6599.73	2.30304	310.148	289.207	36.5717	15.3816	1764.63	18.8333	30.3444	4485.62	790.623	349.169	109.194	75.89	42.6283	21.5072	37.3154	27.0568	203.199	47.0054	77.0953	40.405	33.9478	334.469	14.6604	9.26258	2.16298	6.99496	4.52672	2.78169	2.74458
MLT	0	0	0	0	0	0	0	0	0	0	0	0	0	0	0	0	0	0	0	0	0	0	0	0	0	0	0	0	0	0	0	0	0	0	0	0	0	0	0	0	0	0	0	0	0	0	0	0	0
NLD	1.91329	7.15615	0.111542	0.0510285	0.682564	22.1445	1.98364	0.0452442	5.89008	1.00195	19.7368	2.99638	0.320731	0.772796	1.43661	9.13388	0.0886799	0.454817	0.0735086	0.0410002	121.125	2.5305	1.74803	0.348589	3.19815	0.267852	0.249572	18.7339	15.8989	2.73458	3.81424	1.42376	1.12081	0.704398	1.39776	0.876946	2.12043	1.42597	2.03404	1.78173	0.936348	1.77159	0.350991	0.328129	0.0144987	0.020561	0.0415686	0.0505449	0.00218332
POL	456.547	309.376	49.5403	6.60351	476.338	5010.26	398.377	44.378	543.135	115.885	1334.15	127.653	114.124	336.29	81.2239	1096.23	238.269	29.372	91.363	3.50019	542.775	13449.6	65.6752	199.659	595.926	82.8171	209.04	1357.62	900.412	165.2	292.743	178.763	65.3519	38.4537	89.2795	71.589	1125.46	69.4724	205.622	226.49	83.8527	249.674	19.0492	16.3571	1.62724	2.34805	18.6683	2.97649	0.532349
PRT	90.8481	133.149	9.93711	5.9622	26.5166	824.605	52.3018	2.20515	1979.13	35.7451	1367.65	131.902	13.3191	29.5614	42.7666	663.49	3.40677	10.3267	2.57401	6.79447	201.168	58.4234	8334.25	16.984	86.4682	12.9184	7.36548	722.194	1131.03	119.395	152.939	74.5047	50.7121	36.9492	33.0384	48.4463	56.0503	212.839	104.489	88.3663	38.2561	38.8986	8.83552	15.4822	1.12034	0.752192	1.16862	1.50163	0.199992
ROU	156.081	54.5053	21.2406	5.8359	24.5917	631.152	22.521	1.18539	216.923	10.6733	436.388	227.306	27.5009	223.972	14.9021	948.301	1.63447	5.03567	1.63906	1.50537	107.747	43.0073	18.6121	2447.43	53.3024	27.6288	11.2885	191.535	269.696	53.4274	236.342	29.3093	27.4974	8.34021	26.2205	11.9224	46.6131	17.8821	39.9326	254.331	62.2424	30.9671	5.86829	4.62905	0.386949	1.03274	2.20439	1.15125	0.230585
SWE	614.878	694.082	34.7171	45.4811	273.034	5785.16	2754.09	64.6423	2180.21	1037.66	3251.1	556.177	86.6031	306.662	629.804	3064.88	72.7029	63.042	108.119	11.22	1976.88	961.461	340.282	118.653	35808.6	75.7964	83.494	7462.78	4767.98	1965.36	1407.39	430.444	319.355	173.82	408.886	251.998	709.301	463.444	641.021	513.137	381.186	3993.66	169.645	111.609	2.84251	4.33147	10.3533	16.1071	0.784268
SVN	13.964	1.79633	0.648088	0.138522	2.01397	43.8415	1.75701	0.113007	4.67647	1.29371	11.3991	2.66254	19.76	3.71226	0.767695	41.3528	0.224754	0.246567	0.160516	0.078743	2.83504	3.80098	1.02027	1.77199	3.11898	206.475	2.67212	9.68015	12.9783	2.16652	4.45807	1.30657	1.00261	0.618668	1.78998	0.813183	3.95141	1.46117	3.09679	2.13201	1.53566	1.76937	0.471567	0.237188	0.0868519	0.0344317	0.0849054	0.0355722	0.0105544
SVK	185.007	20.0971	5.90804	2.14751	132.752	399.524	26.2968	1.00611	67.9491	11.7046	110.461	36.7998	16.265	134.824	5.27211	251.471	2.11711	1.60499	2.02359	0.392235	39.2861	103.67	10.413	36.4837	44.1233	25.158	1505.52	99.9474	95.7153	18.8405	23.1007	11.5453	7.22429	4.10481	5.97521	5.47626	53.4286	10.0109	19.8597	18.7752	7.29772	15.517	2.59203	1.35569	0.260352	0.939807	0.624621	0.277874	0.121287
GBR	4.25728	12.5102	0.460334	0.360546	2.31263	46.8513	5.85983	0.305815	23.4902	3.90702	56.0597	5.31318	0.760988	1.8005	57.3563	28.7685	0.35189	1.01821	0.424459	0.895576	18.9755	6.01362	4.08331	1.55229	9.35605	0.558217	0.62718	1172.11	99.4434	13.9072	13.0894	8.37338	6.80082	2.43718	8.29279	3.51453	8.49909	8.46166	7.29857	4.7662	3.41219	5.62316	1.48586	1.78823	0.0725032	0.0996289	0.242334	0.369555	0.0166462
USA	442.527	1154.45	42.9762	23.9696	209.708	5768.21	329.22	18.4884	2765.73	267.873	3670.19	543.501	78.1459	188.248	781.23	4600.2	28.3225	79.1818	24.3484	16.8851	2188.56	464.165	431.305	114.641	669.017	61.5078	54.0605	7709.36	1.06938e+06	10951.5	9583.56	28493.7	4272.42	1820.31	1699.34	18528.8	741.061	2524.31	947.797	900.238	2482.85	373.421	589.692	179.93	17.4983	16.9782	31.6369	60.9865	1.6507
JPN	5.7965	11.8165	0.446355	0.281085	2.43787	67.2838	3.74264	0.249232	23.0345	5.06647	39.1767	6.42643	0.999271	3.42929	7.37971	33.2327	0.294992	0.524089	0.16171	0.390365	24.6365	4.97779	3.00823	1.37587	8.46366	0.807206	0.804997	67.0954	591.48	16784	336.463	30.1257	101.536	10.9941	19.3827	21.8374	10.2845	42.1755	8.03887	7.63961	93.5039	5.20067	17.8371	1.36853	0.382678	0.093555	0.329189	2.36504	0.0791618
CHN	141.571	344.27	17.9678	10.0899	87.1722	1724.17	155.39	8.49803	686.688	118.874	1096.95	174.175	36.8057	98.1904	146.438	1093.26	11.4748	9.99683	7.61203	6.52347	707.074	202.962	77.1545	49.2063	215.354	23.9956	22.0448	2041.2	15871.1	6193.73	132677	999.742	1646.04	194.474	437.167	447.635	515.001	945.925	176.381	212.562	138.892	158.101	247.273	74.2014	10.2006	2.44552	24.7617	96.1493	0.48645
CAN	352.831	679.108	29.4446	16.3199	139.203	3440.97	254.412	12.781	1586.48	214.732	2991.45	450.834	61.4995	130.996	657.066	3762.33	26.5869	47.362	25.5257	12.1291	1139.43	310.138	331.494	84.1944	543.349	48.1084	38.2449	6301.69	270441	7415.01	7449.71	279859	3032.56	1457.39	2492.86	4189.04	521.55	2156.76	572.206	669.573	1769.2	347.8	455.737	108.584	8.72532	11.6303	18.2052	64.1731	1.24496
KOR	2.23963	3.3576	0.262811	0.24517	0.92295	19.6017	2.00646	0.104931	9.92472	2.40076	13.3096	4.85909	0.539934	1.29084	2.42129	14.6469	0.148901	0.202225	0.10287	0.196222	6.53378	2.26824	1.35763	0.813094	3.09094	0.354854	0.39321	22.8727	234.963	82.1051	186.317	13.1795	2463.19	3.81763	14.2728	9.18648	8.93264	26.4742	2.62671	4.67191	56.9792	2.65817	8.17755	0.662828	0.617129	0.0608838	0.270296	3.16406	0.0143113
BRA	2212.01	10885	1165.03	126.239	1593.82	32723	1706.62	167.105	15225.5	1568.77	21570.6	2683.53	955.455	1331.68	1927.54	21515.8	252.381	644.016	127.597	125.296	26416.7	2550.56	4035.31	4087.94	3873.48	1361.18	376.724	24903.7	112773	26627.7	47264	8846.56	10850.5	2.4236e+06	7012.04	9220.68	40019.2	3847.58	3102.51	3307.12	11723.3	1841.78	3342.88	626.195	196.227	314.833	500.808	2632.29	6.32607
IND	9.44245	22.9855	1.70843	0.946202	4.38574	87.2012	9.41666	0.610721	47.002	6.47921	58.4957	13.8906	2.07359	5.33232	7.72309	63.8887	0.972518	2.59004	0.721565	0.941658	33.4316	9.721	9.60935	2.46133	13.1802	2.2527	1.59053	139.091	436.296	106.79	93.1353	33.5948	38.2651	13.2081	17425	19.4488	35.0153	34.0196	14.297	19.009	25.7484	9.69518	33.2889	9.8332	3.02572	0.820402	0.927689	63.5951	2.3273
MEX	10.5268	23.2628	0.763297	0.337669	5.34908	134.243	15.1647	0.360476	84.707	4.9474	86.954	14.9942	1.74772	4.17495	7.65059	53.153	0.546193	1.23363	0.507657	0.383149	35.8907	8.27263	9.95354	2.29436	11.7792	1.43763	1.25824	119.555	12499.2	377.253	98.2722	314.381	66.3238	38.4591	16.0268	121779	28.3322	45.2142	21.5887	9.25703	32.5136	7.59773	4.74458	1.37962	0.272941	0.418687	0.348973	0.672032	0.0396139
RUS	1474.7	1962.5	430.365	321.737	877.271	10428.1	1265.83	1893.5	2802.49	10397.8	5878.13	1915.39	220.205	1670.97	5398.14	7029.3	971.111	186.063	1278.22	29.049	3279.09	1789.83	368.256	512.958	3065.61	187.866	489.079	10831.9	18847.7	19672.9	42755.3	1189.6	4263.81	460.824	4960.87	598.416	197226	1070.78	1147.84	5642.63	8938.26	1196.23	430.533	164.521	102.374	346.997	1652.36	104.766	12.827
AUS	56.2147	101.814	7.19079	3.94141	18.4513	369.248	55.4126	2.28635	187.671	49.3921	297.298	58.0634	10.6506	23.2059	68.8762	311.289	3.20033	10.1169	3.66637	3.2639	161.411	40.9024	48.1036	11.9836	88.702	8.45187	7.88471	1105.63	2985.6	4710.12	2236.73	290.916	887.021	60.6308	347.302	128.696	108.925	71468.9	88.3141	74.4608	590.93	57.6515	323.687	68.9837	2.51098	3.22069	4.54461	41.7323	1.37715
CHE	5.5182	2.9369	0.215523	0.0634202	1.06916	31.5366	1.20279	0.0474707	5.28395	0.735337	18.3745	1.94287	0.484046	1.34369	1.22014	16.6772	0.0869545	0.269115	0.0800643	0.0472998	3.74928	1.49796	0.988681	0.62887	1.64277	0.380384	0.352511	11.6335	18.3568	3.52613	3.29774	1.48008	1.37067	0.858414	1.67278	0.915871	1.78639	1.26338	211.826	2.20161	0.773415	0.895226	0.333573	0.422944	0.019491	0.0961796	0.069842	0.0884288	0.00322809
TUR	26.6222	33.0627	42.8765	13.0018	9.55686	272.996	20.3747	1.09605	82.6754	10.5737	135.333	86.2763	5.99946	12.8927	18.7438	176.174	2.50086	3.14897	1.76962	2.94342	57.1014	24.3771	15.8402	69.7146	27.3554	5.58009	3.80444	195.203	278.321	34.0767	68.3683	24.4221	17.5108	8.01237	15.2638	12.6908	85.9943	18.6542	21.3786	12422.3	15.6602	15.2989	5.43335	12.4689	1.51547	4.41115	31.2055	1.24996	0.156406
TWN	1.31895	3.63404	0.292982	0.197133	0.966329	15.7104	1.56324	0.1778	6.4969	1.25441	10.3897	2.0186	0.460414	0.93416	1.43907	10.0073	0.191978	0.186283	0.136941	0.0989951	6.37303	2.50836	1.00553	0.592804	2.1203	0.322454	0.32022	21.6456	159.104	78.8618	6.88033	11.0513	20.3007	1.7403	3.97825	4.96722	6.96272	11.9879	1.73115	2.29336	419.133	1.57364	4.42673	1.22756	0.0297836	0.031082	0.0456595	0.583565	0.0131974
NOR	51.4614	96.7004	3.30769	2.08286	21.0792	582.977	237.997	5.25877	192.582	69.8764	329.031	61.9312	8.58512	24.9838	59.0621	277.122	8.71881	8.4137	5.5746	1.23192	183.085	85.4844	34.8834	10.1274	761.437	10.3333	7.71229	982.648	882.069	180.004	199.58	59.402	58.7565	51.3372	55.0113	37.9899	59.8865	61.729	66.6917	64.31	54.6519	7674.41	15.3745	11.7289	0.604972	0.471992	2.054	1.87596	0.164518
IDN	326.425	1045.21	64.1901	25.5637	143.619	3450.15	308.123	23.212	1761.97	216.754	2126.15	426.177	58.8638	180.706	232.848	2044.75	20.7641	72.9391	13.8176	12.6324	1645.7	459.08	253.275	138.35	386.887	85.6677	69.8342	3739.76	19297	14597.3	11192.5	1365.92	3757.7	777.043	7114.05	748.47	656.666	2768.83	328.203	927.65	3231.76	300.813	294539	141.691	78.4843	9.63134	12.7427	582.374	1.86538
ZAF	158.349	264.334	9.4387	6.86074	36.5951	1228.76	74.0367	4.0522	838.976	62.3443	762.503	111.543	19.3921	40.4065	150.76	959.802	4.68458	17.0887	3.72576	3.79366	363.653	77.7751	120.209	24.2002	109.986	15.0565	12.959	2402.12	3542.8	3206.18	1222.07	222.784	301.169	170.232	827.51	132.563	126.552	690.752	122.139	144.745	295.772	93.1923	208.626	61162.6	5.16495	2.70517	4.62835	15.4629	1.30226
AFG	0.131386	0.153861	0.00810776	0.0037434	0.0146098	0.406124	0.166138	0.00591271	0.124736	0.0675033	0.251392	0.0693329	0.00787115	0.0475397	0.0859223	0.243105	0.00753699	0.0247659	0.00812392	0.00453786	0.0873563	0.0417145	0.0163298	0.0110022	0.0445592	0.0192085	0.00810977	0.326804	2.16486	1.40098	1.035	0.054291	0.281996	0.0587426	31.4649	0.0972217	0.493011	0.146102	0.0331179	0.102784	0.182036	0.0299092	0.0686276	0.0545808	42.8029	0.00212542	0.00332494	0.0915375	0.00160294
ARM	1.64911	2.60881	0.0920364	0.0411627	0.1315	3.93318	1.36747	0.0727425	1.40631	0.216221	2.61371	0.409332	0.075829	0.55662	1.26486	2.29204	0.203248	0.303369	0.12063	0.03636	0.855681	0.330202	0.177932	0.114587	0.439177	0.211675	0.0928221	1.69643	17.0627	7.76184	2.33718	0.514517	4.16476	0.526041	1.08602	0.913062	12.9595	1.18369	0.465079	0.57912	1.81302	0.243805	0.6044	0.724255	0.0498289	189.347	0.0588174	0.04281	0.0207792
AZE	1.98463	1.11726	0.111017	0.0687701	0.606006	14.0112	0.93477	0.113941	2.39943	0.30561	7.53563	0.976736	0.138258	0.47946	1.4736	27.7653	0.604657	1.63691	0.20187	0.0882031	3.16915	0.803682	0.493347	0.299508	0.569549	0.253937	0.235953	5.35962	46.6484	10.0362	3.82819	2.02989	3.95845	0.755996	0.930088	1.79185	26.4716	1.44878	0.753032	10.4324	2.2454	0.327385	0.702872	0.715646	0.194389	0.0608275	525.88	0.0462634	0.017586
BGD	0.916908	1.64807	0.0342639	0.0140603	0.127369	7.8811	0.850979	0.0241192	2.27315	0.630266	2.62918	0.296887	0.0442512	0.175851	0.395696	5.51687	0.0179497	0.147917	0.212064	0.0116098	1.97162	0.297271	0.219156	0.0555244	1.0952	0.0545564	0.0463077	18.6307	16.053	28.6379	5.55528	1.91363	1.13102	0.195718	5.03998	0.343374	0.786911	0.533862	1.07669	0.264962	0.333279	1.0018	0.196879	0.250594	0.197465	0.00530766	0.00985852	875.733	0.0496964
BTN	1.9025	1.25544	0.296218	0.051792	0.118158	2.76585	1.44081	0.0850053	2.74813	0.387777	3.52433	0.475123	0.116572	0.65281	1.71323	2.88412	0.0936525	0.285345	0.087141	0.058956	1.65861	0.364263	0.656181	0.11319	0.805962	0.21062	0.125262	2.5494	23.2742	7.77743	1.72067	1.36369	1.92239	0.903642	78.6223	1.05515	4.09949	1.32414	0.287977	0.688998	1.0559	0.296202	0.901196	0.40324	0.0439723	0.0269039	0.0413599	1.87956	144.413
BRN	2.34862	2.27888	0.180801	0.0682132	0.267703	5.8478	1.91269	0.0846933	2.6906	0.352218	4.48705	0.640751	0.142433	0.784474	1.30311	3.73119	0.125294	0.281256	0.0944962	0.0884023	2.36372	0.69055	0.282538	0.162759	0.741079	0.294336	0.25402	15.7729	48.9955	89.6977	20.6207	1.67461	38.0165	0.969501	2.81781	1.90119	4.92574	10.0384	1.83193	1.32806	4.64976	0.401688	2.59466	0.817471	0.0411925	0.0264493	0.0485946	0.139942	0.0189041
KHM	208.789	140.264	7.43903	2.4759	12.6128	670.538	138.545	4.69901	134.187	24.3397	319.631	28.8118	5.65884	52.3387	94.7651	236.451	5.83841	9.34003	5.17317	2.2132	134.758	30.5441	17.2736	5.22146	105.763	20.5012	7.1989	1080.12	2811.27	417.349	1752.81	111.835	274.613	27.1468	50.8453	48.4522	317.011	94.6239	91.8704	45.5996	61.6169	106.816	50.0302	32.7649	1.3559	0.926876	1.55849	3.4913	0.567553
PRK	7.4242	6.14715	1.12521	0.230367	1.18966	31.6945	7.60325	0.41836	24.1496	1.58271	23.6982	3.48382	0.854177	2.6903	6.30847	20.9405	0.426778	1.10517	0.35872	0.201745	11.8988	3.59454	1.44036	1.24994	3.75101	1.13493	0.591969	22.264	187.768	309.707	2539.37	9.54889	82.5454	35.8716	11.5797	50.2524	23.561	12.7626	3.75415	4.75861	13.0142	2.16447	5.06634	4.79127	0.206215	0.105106	0.410879	1.28461	0.0802372
FJI	1.62075	2.16587	0.134703	0.0770514	0.337632	9.23194	3.99158	0.113016	3.80657	0.539327	8.59135	1.74628	0.176868	0.786314	1.94664	11.3756	0.136335	0.704939	0.131567	0.0917693	2.61323	0.771217	1.57761	0.411763	1.15145	0.342828	0.171512	28.8705	120.458	311.217	21.8335	4.14948	87.6975	1.22864	5.25953	2.59224	4.68539	89.9756	0.860833	1.46046	26.2793	0.790806	4.25401	1.29982	0.118672	0.120625	0.111196	1.1652	0.0718824
PYF	0	0	0	0	0	0	0	0	0	0	0	0	0	0	0	0	0	0	0	0	0	0	0	0	0	0	0	0	0	0	0	0	0	0	0	0	0	0	0	0	0	0	0	0	0	0	0	0	0
GEO	0.237599	0.303313	0.0564446	0.0324128	0.0788194	2.48961	0.61923	0.0211914	0.842124	0.080869	2.16915	1.28521	0.0365348	0.106565	0.189802	2.6557	0.0577021	0.13409	0.0317351	0.0181696	0.377651	0.141934	0.0837982	0.101802	0.178427	0.048682	0.039707	0.961147	6.24474	14.0242	1.44945	0.199507	5.04164	0.181025	0.641863	0.279285	2.39266	0.915275	0.172831	9.58253	2.61103	0.108149	0.499299	0.153924	0.0661495	0.458834	0.237331	0.022321	0.0128869
HKG	0	0	0	0	0	0	0	0	0	0	0	0	0	0	0	0	0	0	0	0	0	0	0	0	0	0	0	0	0	0	0	0	0	0	0	0	0	0	0	0	0	0	0	0	0	0	0	0	0
KAZ	4.46113	2.33154	0.371236	0.247184	3.52998	21.2684	1.20184	0.574672	6.30294	2.16628	17.0176	3.0151	1.09594	1.14765	1.08653	25.4295	0.539131	0.892171	0.433362	0.182415	3.6941	3.16909	0.91141	2.94592	1.73959	0.358227	0.790672	8.43915	26.5345	9.26404	67.9406	1.52553	4.22077	1.24889	2.72675	1.5227	46.3697	3.26509	1.83906	13.6728	4.15235	0.95955	2.2458	1.13388	0.777189	0.101234	1.73005	0.126613	0.0294941
KGZ	0.0696195	0.0926938	0.0255785	0.0051186	0.0317501	0.603578	0.20855	0.00844635	0.228361	0.0354968	0.342628	0.0615386	0.0133948	0.0475035	0.0640452	0.678431	0.00980098	0.0643237	0.0117679	0.00628605	0.100548	0.0514816	0.0253818	0.0298646	0.0683548	0.0183502	0.0141039	0.303514	1.77502	7.59869	1.97265	0.0594254	1.72107	0.0862417	0.319194	0.195817	0.498723	0.485422	0.0431848	0.232287	1.46139	0.0432139	0.235804	0.0721499	0.0651485	0.0054952	0.016548	0.0192874	0.00362913
LAO	232.359	172.51	9.54358	3.12958	59.7151	376.846	132.115	5.40845	201.752	27.5585	547.686	24.6841	6.50915	71.8193	61.9769	302.065	6.67609	13.4845	5.49121	3.05176	115.626	211.595	18.8434	9.16911	44.3524	21.6709	19.9249	345.423	1052.21	372.909	913.989	58.5033	100.064	43.4402	47.3491	50.8661	376.533	72.9536	249.845	45.2202	97.9732	72.7217	39.9507	27.6722	1.43822	1.07623	1.80942	2.51461	0.777351
MAC	0	0	0	0	0	0	0	0	0	0	0	0	0	0	0	0	0	0	0	0	0	0	0	0	0	0	0	0	0	0	0	0	0	0	0	0	0	0	0	0	0	0	0	0	0	0	0	0	0
MYS	328.03	871.485	39.2985	31.7819	197.144	3742.76	344.73	61.277	1417.26	370.153	2548.14	439.567	64.9692	198.728	386.423	2112.49	39.4576	97.2502	13.9224	26.3645	2345.89	325.958	258.127	141.461	495.973	52.4357	63.2573	5778.39	14928.2	14490.4	8454.76	1488	4813.25	460.893	4064.32	751.063	654.879	2294.24	532.707	685.877	1960.4	332.32	4331.93	1081.07	11.7537	8.17304	12.2185	192.628	1.2704
MDV	0.0184481	0.00935032	0.000890709	0.000305439	0.0008059	0.0453536	0.0141913	0.000624862	0.0170776	0.00235547	0.0229752	0.00303934	0.000689834	0.0058692	0.0100004	0.0179123	0.000920828	0.00132956	0.000818319	0.000243923	0.0061846	0.00229982	0.00183727	0.000874342	0.00518019	0.00211393	0.000711524	0.0437473	0.153647	0.0332928	0.0101264	0.0108884	0.00478501	0.00656651	0.007174	0.00688212	0.0375133	0.00527513	0.0020572	0.00406635	0.00242819	0.00159666	0.00453651	0.00297692	0.00019884	0.000139729	0.000210032	0.000222351	0.000126365
MNG	0.676933	1.02189	0.0832208	0.0532883	0.321426	4.69828	1.25162	0.050421	2.361	0.311624	3.40767	0.617041	0.113733	0.351416	0.568391	9.52563	0.0576554	0.210343	0.0569594	0.0443951	1.79316	0.590668	0.218188	0.205546	0.608033	0.120467	0.16978	5.30807	35.465	49.3626	604.318	1.66857	20.7403	0.63781	2.3356	1.44484	9.24372	2.79579	0.985961	1.04109	6.13206	0.428142	1.31041	0.410182	0.0436698	0.0241335	0.0763537	0.19811	0.0187753
MMR	26.125	33.3102	1.59366	1.04283	5.05858	107.833	19.7273	0.781953	40.0286	7.09243	74.8488	14.4174	3.38978	7.98919	12.6497	78.652	0.9771	2.57008	0.763488	1.87496	44.2534	16.3786	6.67881	2.0386	13.7521	3.17105	9.58358	377.494	709.187	621.257	1027.35	76.9254	180.887	11.4517	4360.64	22.5762	29.5995	150.961	27.8685	16.8499	92.195	8.73259	95.8576	13.0027	0.592018	0.290593	0.498654	231.415	0.489205
NPL	2.2364	2.75635	0.165245	0.051081	0.279719	12.0722	2.50914	0.0623158	3.21679	0.374105	11.2087	1.18795	0.28772	0.647548	1.10551	6.97869	0.0852541	0.738883	0.0789249	0.0609211	2.11642	0.558912	2.26085	0.161299	0.981143	0.256727	0.125288	10.1581	34.7416	17.3047	45.3723	2.03183	2.46169	1.01111	343.215	1.56269	3.84575	2.35451	2.9723	1.14868	1.44181	0.582233	0.821013	0.57505	0.0582039	0.025843	0.0405246	2.24135	0.306594
NCL	0.552184	0.700922	0.0447451	0.0213638	0.09862	2.55336	0.476614	0.0276226	2.84344	0.434246	5.43431	0.217081	0.0579707	0.207949	0.504889	2.45641	0.0355744	0.110438	0.030608	0.0255712	0.550436	0.235605	0.173238	0.0695779	0.310143	0.0768418	0.0842944	2.01409	9.31849	25.3351	3.7672	0.664227	4.7453	0.489622	1.5987	0.436133	1.20416	7.33694	0.519896	0.318134	2.30669	0.162698	0.590087	0.291283	0.0132859	0.00915811	0.0161081	0.0439677	0.00644401
NZL	41.2388	258.602	3.05236	3.14524	16.5806	418.025	50.2774	2.41735	163.288	27.473	276.094	33.8042	5.6589	18.2839	46.7179	340.332	4.12658	11.7372	2.71941	2.43408	184.326	24.0728	20.4252	7.44446	40.0311	5.94676	5.02425	754.495	2460.03	3545.13	3457.29	198.396	2076.84	42.544	360.278	148.301	89.0477	3817.75	75.9943	31.3866	488.928	32.0966	240.697	87.355	1.54636	0.970392	2.49166	8.57072	0.568206
PAK	0.242091	0.644433	0.0170658	0.0320278	0.0809607	2.73979	0.267667	0.0122122	1.05828	0.094953	1.41235	0.424144	0.0342136	0.0868746	0.204349	1.75018	0.0124932	0.0935767	0.00932957	0.0120993	0.858855	0.189882	0.260317	0.0409853	0.315774	0.0229369	0.0354828	7.47374	9.14602	1.8964	3.20061	0.892993	4.7022	0.107673	10.0422	0.263331	0.283975	1.27877	0.425739	0.596734	0.224994	0.411613	0.25203	0.675686	0.438975	0.0121455	0.0204556	0.0862571	0.00208523
PNG	17.2417	70.3986	1.42871	0.503752	4.59284	530.032	16.0247	0.957209	33.798	4.89307	145.978	11.4478	1.27223	4.8897	12.6684	91.3738	0.643201	1.47817	0.551099	0.499777	46.88	10.4884	14.5403	1.94869	17.0396	1.93652	1.82323	335.922	623.915	4522.04	405.099	30.7735	978.423	6.48151	29.9954	15.8615	26.3357	289.827	8.58003	8.1408	49.0021	4.92196	104.21	5.28197	0.357445	0.170046	0.459674	4.55716	0.0803454
PHL	20.2362	45.2959	1.06023	1.21412	5.78122	324.802	18.3998	0.606505	59.035	14.0106	102.822	15.4024	2.30551	6.17346	20.9829	119.225	0.866242	1.906	0.688957	1.66871	105.633	11.1558	7.84211	1.6949	24.6619	2.42749	3.35544	417.808	1879.79	1639.75	457.539	158.518	398.299	32.91	36.2783	36.2168	39.8252	52.5424	47.5931	13.1543	48.8185	20.0539	162.461	30.015	0.356635	0.346317	0.458446	2.11353	0.143484
WSM	0	0	0	0	0	0	0	0	0	0	0	0	0	0	0	0	0	0	0	0	0	0	0	0	0	0	0	0	0	0	0	0	0	0	0	0	0	0	0	0	0	0	0	0	0	0	0	0	0
SGP	0.0460859	0.103354	0.00333192	0.00347402	0.0215373	0.976149	0.0668287	0.00232286	0.234732	0.0301593	0.458957	0.035412	0.00695174	0.0243928	0.1206	0.292195	0.00240748	0.017489	0.00576652	0.00495754	0.256152	0.035714	0.0240948	0.00624537	0.0612113	0.00509741	0.00861599	0.836271	2.06794	1.04961	0.737334	0.171127	0.475381	0.0842963	0.296729	0.076803	0.0767913	0.656554	0.101217	0.0350877	0.0840681	0.0613867	0.448315	0.130415	0.00205185	0.00083756	0.00189396	0.0274245	0.000400265
LKA	6.4664	22.74	1.29083	0.6698	5.23814	110.039	5.31432	1.24747	20.2849	21.6514	59.5996	7.18468	1.52099	2.79984	10.469	62.8956	3.14091	0.58652	41.8078	0.30529	32.8601	15.1021	4.75933	1.44143	8.52692	1.611	3.55984	144.164	238.507	228.273	31.6486	26.6652	36.5897	4.78037	200.358	42.4728	181.738	22.339	11.5845	79.1983	4.42547	4.66678	2.86894	6.70434	0.564456	0.374156	3.20866	0.722862	0.0173208
TJK	0.0896065	0.0531696	0.0695464	0.00191135	0.0311455	0.186723	0.0850001	0.00490125	0.0966783	0.0146564	0.258677	0.0308202	0.0115075	0.0336727	0.0463714	0.27114	0.0049506	0.0110194	0.00463305	0.00191645	0.0347709	0.0334597	0.013585	0.013397	0.0264824	0.0171005	0.0351854	0.106244	0.681965	1.03777	0.225989	0.0237029	0.519357	0.0319513	0.0595071	0.0400713	0.991302	0.0845766	0.0187339	0.0773298	0.216648	0.0857456	0.041118	0.0234486	0.00180302	0.00131242	0.00918998	0.00190792	0.000797032
THA	100.717	229.404	7.73739	13.7779	67.4339	1099.94	91.2077	5.85081	362.166	71.8089	515.61	69.7762	15.3386	38.6738	69.4287	517.448	8.00207	35.5051	5.89937	7.74622	513.873	100.19	87.694	29.6827	174.076	11.4638	19.2702	1620.09	4342.53	4273.74	2150.89	516.522	622.195	114.53	330.49	156.952	209.213	417.687	313.736	97.7477	245.731	135.67	521.412	255.147	2.03286	1.26682	3.11768	36.7522	0.419162
TKM	0.0807383	0.0479607	0.00799308	0.00268833	0.0211115	0.375924	0.0782015	0.00430608	0.130687	0.0131748	0.595044	0.0337669	0.00699966	0.0281923	0.0436769	0.539445	0.00458122	0.00769077	0.0103501	0.0017122	0.0500575	0.0859911	0.00974688	0.0132681	0.0245789	0.00950435	0.00845379	0.15315	2.42266	1.51316	5.14676	0.13743	1.0904	0.027137	3.58536	0.0863372	0.45895	0.0844423	0.0478126	0.965908	0.249375	0.0127857	0.0382436	0.0220808	0.148487	0.00828811	0.0299173	0.00377332	0.000759987
USR	0	0	0	0	0	0	0	0	0	0	0	0	0	0	0	0	0	0	0	0	0	0	0	0	0	0	0	0	0	0	0	0	0	0	0	0	0	0	0	0	0	0	0	0	0	0	0	0	0
UZB	0.0414619	0.0863973	0.0285671	0.00287622	0.0351451	0.353133	0.0183437	0.0211015	0.11473	0.0148309	0.627252	0.0402417	0.00957628	0.0150591	0.0298641	0.690034	0.0213734	0.0156324	0.00854037	0.00250489	0.050584	0.155532	0.0551512	0.0164842	0.0270784	0.0111732	0.0171067	0.131066	0.421433	0.221584	0.15862	0.058093	0.314058	0.0442019	0.134556	0.0344057	1.71944	0.0709516	0.0278339	0.150449	0.0621876	0.0117235	0.0309019	0.0150473	0.00252969	0.00199491	0.00547104	0.00201083	0.00073503
VUT	0.754536	2.70093	0.0460992	0.0225873	0.137976	13.089	2.34148	0.0500304	1.61963	0.179116	5.74575	0.276977	0.0523651	0.294665	0.432784	5.85123	0.0458815	0.166452	0.0377806	0.0251314	0.684066	0.222606	0.120483	0.178374	0.527514	0.129045	0.0533214	2.18873	12.7178	83.6987	10.7652	0.499776	43.2408	0.313258	2.41059	0.5507	2.05937	4.56542	0.472341	0.628329	14.6846	0.229218	1.56406	0.29406	0.038347	0.0232295	0.0337747	0.493875	0.0264622
VNM	77.7133	221.182	8.50357	2.6868	81.8136	728.646	78.788	9.00235	346.287	35.6875	457.619	40.2549	12.3077	45.4091	36.9447	526.584	8.19903	7.34982	17.9064	1.72629	257.049	160.232	39.4033	25.9278	84.8755	10.8004	42.4157	813.176	1784.16	1577.9	1733.15	173.455	884.514	52.9691	139.793	71.7537	301.135	341.084	128.259	47.9692	569.396	79.0152	209.616	48.3846	1.05631	1.17422	1.85222	4.82611	0.351179
ATG	0.121515	0.109467	0.00564173	0.00245405	0.0110651	1.1143	0.0758166	0.00423551	0.198244	0.018203	0.48381	0.0647913	0.00509369	0.0484951	0.0409434	0.338401	0.00629535	0.00812704	0.00466197	0.00245054	0.0417215	0.0521974	0.0655099	0.00999092	0.0503595	0.013913	0.0252433	0.541869	1.61859	0.0821934	0.164354	0.07055	0.233388	0.0620505	0.108378	0.150501	0.327127	0.0409946	0.0331253	0.040596	0.0241946	0.0204459	0.135091	0.0656323	0.00351262	0.00233878	0.00335078	0.00399371	0.00288045
ARG	250.796	1145.36	224.008	94.3055	144.485	5416.49	219.282	18.5712	4209.67	106.817	2324.47	801.03	90.8281	128.29	203.974	4609.09	50.5144	49.5797	27.4312	31.0118	3019.37	345.286	904.094	145.397	300.011	70.4883	53.4174	2913.74	10152.5	2704.35	10822.2	895.777	933.315	17037.9	4479.42	1689.4	1690.55	754.35	386.782	962.728	331.161	198.433	354.018	1325.5	12.2728	13.0171	20.7481	1963.69	2.50926
ABW	0.0137388	0.0177451	0.000651436	0.000123936	0.000423542	0.0654454	0.00690104	0.000345348	0.0196986	0.000932187	0.0477862	0.0011739	0.000220441	0.00397934	0.0021718	0.0367711	0.000483098	0.000347229	0.000314466	0.000137378	0.0196737	0.00433185	0.00056674	0.000335031	0.00248484	0.00141142	0.000265574	0.0441898	0.210647	0.00351591	0.0135184	0.00218726	0.00124577	0.00267201	0.00184125	0.0149339	0.0195844	0.00190211	0.00102997	0.00378614	0.000695728	0.000613194	0.000750163	0.000658285	0.000272965	0.000167721	0.000222498	0.000243046	0.000166645
BHS	0.435804	0.458282	0.0372011	0.0395931	0.0781845	4.29421	0.360454	0.0387328	5.72493	0.107779	2.80496	0.10262	0.0798863	0.171553	0.172442	1.81446	0.021651	0.0292421	0.0257949	0.0218947	0.222139	0.185301	0.135815	0.203947	0.135785	0.0574172	0.0390184	6.51938	13.3023	0.896306	0.630996	0.948944	0.166625	0.283636	0.144688	0.873029	0.901673	0.892838	3.89913	0.21487	0.091888	0.126553	0.0592262	0.167103	0.0104535	0.0153929	0.010981	0.0116325	0.0079181
BRB	0.00722414	0.00836493	0.000368767	0.000169611	0.00100826	0.0377105	0.00460703	0.000228033	0.0177703	0.00140823	0.0451926	0.00167105	0.000299088	0.00239947	0.00521476	0.0192768	0.000329071	0.000698244	0.000449516	0.000145783	0.0393711	0.00264393	0.00111378	0.000430701	0.00296944	0.000750002	0.000522057	0.212686	0.26142	0.00847143	0.0130388	0.0260712	0.00281577	0.0112114	0.00351105	0.0115635	0.0146736	0.00429349	0.0051232	0.00300413	0.00605165	0.0018383	0.00379894	0.00162941	0.00779931	0.00015969	0.000214094	0.000223705	0.000149266
BLZ	7.46525	8.17437	0.45795	0.244467	0.890473	44.882	4.89978	0.284082	25.6073	1.65966	31.321	2.97775	0.621488	3.25031	59.1305	48.7446	0.435602	0.984122	0.245809	0.181826	44.0368	3.0038	17.7453	0.565166	19.3398	0.765614	0.54752	882.05	896.784	256.005	284.607	44.6045	11.656	9.05303	9.87352	43.5193	15.1341	5.54452	3.10165	4.98632	6.76494	2.56102	2.86925	2.13355	0.216912	0.370797	0.295443	5.23584	0.157517
BMU	0	0	0	0	0	0	0	0	0	0	0	0	0	0	0	0	0	0	0	0	0	0	0	0	0	0	0	0	0	0	0	0	0	0	0	0	0	0	0	0	0	0	0	0	0	0	0	0	0
BOL	336.508	319.663	15.2929	4.32424	23.9849	1936.46	194.543	7.55274	1041.08	54.527	1416.84	69.7124	8.92949	85.7194	57.5359	1372.08	17.7093	13.4233	7.81103	4.96856	435.276	107.582	42.017	22.7573	73.7503	34.67	9.29129	1194.33	7474.53	846.392	899.429	384.207	165.652	2263.4	305.282	489.203	830.661	209.75	152.073	90.8012	56.9151	26.7685	37.4071	45.4447	6.38565	4.17623	6.1824	9.22181	4.36012
VGB	0.0178532	0.0179145	0.000804448	0.000264801	0.000955407	0.0879764	0.0101959	0.000577699	0.0281606	0.00207527	0.0661497	0.00203654	0.000937605	0.00572134	0.00485719	0.0706994	0.000807298	0.00075179	0.000605323	0.000252432	0.00496539	0.00621662	0.001353	0.00128642	0.00397565	0.00201376	0.000564504	0.0115616	0.223835	0.00670015	0.0190696	0.00414077	0.00247121	0.00677319	0.00442049	0.0183708	0.0382297	0.00611745	0.185342	0.00647066	0.00346107	0.00113428	0.00221287	0.0275229	0.000365953	0.0133956	0.00510522	0.000349626	0.000282338
CYM	0.0337306	0.0368329	0.00175158	0.000737392	0.00231846	0.176689	0.0234979	0.00122461	0.13375	0.00467026	0.129779	0.00888787	0.00124237	0.0121865	0.011055	0.130763	0.00185289	0.00198674	0.00136069	0.000586965	0.0103002	0.0133192	0.00316577	0.00403939	0.00971594	0.00421419	0.0013955	0.0547761	0.528126	0.0219517	0.0465617	0.0215992	0.00760587	0.0221732	0.0110143	0.0445497	0.106424	0.0111066	0.013615	0.0109698	0.0366707	0.287235	0.00503486	0.0121978	0.000916453	0.000652287	0.000950911	0.000911494	0.000848848
CHL	65.8911	192.749	11.8364	3.23399	24.2174	771.487	115.498	3.57497	1476.19	53.5696	771.677	88.1676	14.4965	25.4498	99.0639	1156.64	4.74228	14.0295	6.48599	2.28058	667.862	52.7812	136.508	16.1182	118.605	11.8025	7.94467	921.273	18082.3	3549.05	2473.68	1259.37	1015.72	810.628	235.57	2376.56	125.136	347.191	164.254	117.248	383.582	120.208	225.426	76.5277	1.82487	2.26657	3.13407	16.6048	1.44393
COL	96.5275	889.629	11.612	3.89129	121.799	2128.67	315.26	3.13521	743.271	100.942	691.38	90.8321	43.9434	86.6936	118.86	1581.17	10.5687	6.02323	2.14791	5.12404	474.577	74.8314	184.437	31.1622	217.223	44.2549	35.7961	1614.27	12103	1420.19	252.441	715.351	184.781	381.438	35.7029	588.225	238.503	133.911	191.757	39.6901	76.0697	132.291	17.9005	34.1364	3.43014	1.72983	4.81095	3.3418	0.470905
CRI	27.2024	271.821	4.25245	0.50425	15.5724	363.727	6.52717	1.34184	84.9744	21.568	93.6297	28.9208	2.22213	3.72966	30.4548	283.229	1.56921	0.650792	0.299092	0.46575	78.9621	19.1863	41.8345	4.2815	100.849	2.48482	9.94239	296.455	2201.34	87.6488	57.0866	83.9613	14.6475	7.85434	6.19632	136.62	45.9422	11.0395	55.5755	5.94281	5.21199	50.7724	6.74481	3.93672	0.176838	0.612741	0.240679	0.270994	0.050645
CUB	5.30165	10.1974	3.96833	9.65975	1.10326	52.1134	2.33901	1.1333	178.741	3.08079	72.8864	2.56465	0.723733	1.11788	1.72706	41.0882	1.81816	0.334107	0.602513	0.677911	26.8787	2.35275	13.6629	14.8264	2.20273	0.513987	0.480039	23.1929	51.2192	23.2384	120.232	28.0217	5.99684	7.42222	5.64103	19.8151	161.855	8.47321	40.3631	2.33142	1.38286	8.30354	0.625594	1.58713	0.0861934	2.81097	0.423427	0.143392	0.0420615
ECU	53.82	119.984	5.14821	0.542239	18.3461	411.982	144.803	2.7837	220.68	9.2832	155.457	54.3294	15.0201	15.352	4.13447	602.036	10.9954	74.4665	0.747852	1.6414	143	37.569	36.9487	31.1125	19.0879	8.9118	5.48417	161.933	1212.83	184.893	69.7815	51.3544	60.8023	17.2832	5.71594	41.9082	267.416	15.6119	23.1947	11.9634	14.1873	9.28986	3.60664	6.15444	0.402902	0.219379	0.973253	1.00951	0.0953218
SLV	8.26919	23.0251	0.412991	0.159649	13.7442	160.254	3.80082	0.241627	115.435	8.36802	50.9449	3.45164	1.33567	1.86253	3.04747	37.2441	0.458102	0.447517	0.284109	0.10753	10.3193	3.11535	6.31224	0.775188	4.54647	0.747436	0.963542	52.6776	955.619	55.0907	14.6801	44.81	11.3718	2.52317	3.561	108.672	68.1774	6.75203	5.71972	3.10539	3.7302	2.11086	1.46311	1.25037	0.235641	0.297163	0.376071	0.199226	0.0995448
GRL	0	0	0	0	0	0	0	0	0	0	0	0	0	0	0	0	0	0	0	0	0	0	0	0	0	0	0	0	0	0	0	0	0	0	0	0	0	0	0	0	0	0	0	0	0	0	0	0	0
GTM	114.109	333.628	69.4274	2.57661	33.2412	1528.18	62.885	8.85803	1017.36	130.642	609.969	66.0007	19.3813	26.8914	58.1478	772.398	15.5226	408.435	4.55536	2.58895	507.003	70.875	65.7687	40.5993	235.933	19.5743	10.642	628.984	20430	938.247	327.463	1304.83	973.222	48.4853	212.382	1688.72	1015.43	243.329	480.822	119.459	65.6023	129.178	62.6859	41.4056	18.2426	17.6259	6.59167	18.0037	1.03882
GUY	0.609554	1.07236	0.10878	0.0447361	0.111918	6.61951	0.648898	0.0270471	2.58754	1.30822	7.50109	0.433807	0.0417756	0.229571	0.50433	2.52167	0.0354071	0.277549	0.0216036	0.0217887	2.39179	0.34308	5.23451	0.103643	0.466622	0.0811997	0.0413519	36.9913	75.8458	2.42164	2.36452	13.2333	1.14585	0.956835	0.421123	1.93646	1.30387	0.632374	0.487198	0.491014	0.656801	0.256664	0.197558	0.150078	0.025984	0.0184809	0.027749	0.0335719	0.0163086
HTI	1.49741	2.51299	0.106652	0.028661	0.113892	10.8034	1.04671	0.0468136	3.09104	0.246491	8.4316	0.504549	0.0906634	0.503391	0.480594	10.156	0.0779428	0.100272	0.0434303	0.0239311	1.04668	0.631968	0.196466	0.0862923	0.484211	0.184567	0.065394	2.60372	125.59	3.3108	3.34904	5.75186	1.04004	0.613914	0.440213	2.90246	4.39071	0.603593	1.37403	0.639972	0.766842	0.282946	0.22788	0.179208	0.0471383	0.0326082	0.044614	0.046315	0.0351502
HND	55.9963	381.92	16.705	1.05968	30.579	1173.33	41.7643	3.01038	574.822	42.6875	333.833	29.5889	6.23588	24.4112	56.7483	261.514	11.7322	9.92757	1.44137	0.876593	328.884	58.4826	56.8012	12.8644	75.6625	9.6308	11.0867	480.103	7393.06	466.07	76.756	314.358	114.362	66.7875	11.4874	360.669	179.935	48.0764	146.376	29.0505	24.8181	21.9478	5.56522	12.0309	1.17292	1.12772	1.3316	0.917904	0.352534
JAM	1.2585	2.97474	0.0980707	0.378971	0.24168	11.1785	1.19884	0.0714166	3.35841	0.628394	8.66809	0.38512	0.0844307	0.41713	0.926853	4.53352	0.0653006	2.08379	0.0622284	0.0343434	6.66457	0.807778	0.670672	0.172372	4.75182	0.148162	0.0776093	84.76	125.943	23.0577	4.23168	18.8641	0.886694	0.648104	0.708151	5.60664	2.58899	0.88896	1.79428	0.60574	0.493432	8.23107	0.213929	1.55761	0.0278857	0.0319153	0.0716389	0.138796	0.0165456
ANT	0	0	0	0	0	0	0	0	0	0	0	0	0	0	0	0	0	0	0	0	0	0	0	0	0	0	0	0	0	0	0	0	0	0	0	0	0	0	0	0	0	0	0	0	0	0	0	0	0
NIC	80.6389	136.245	5.43871	1.43639	23.1451	647.121	35.289	1.61511	443.618	78.7261	349.149	27.246	4.37073	15.3234	165.052	283.194	2.74047	5.22677	1.8814	1.94165	138.752	23.1756	23.1079	9.14464	54.6302	6.70553	4.38474	945.321	9634.97	272.958	134.525	318.085	50.535	20.5749	17.5349	1444.51	641.887	61.2785	122.309	25.79	30.4331	23.117	17.5072	9.89898	1.73609	1.64842	2.29061	1.98915	0.812847
PAN	52.811	181.01	3.12139	0.737583	41.1657	443.847	9.81664	4.79828	271.051	21.2813	91.2782	41.1653	4.42444	20.7803	6.27311	281.611	1.2921	0.807424	0.428673	0.730585	35.7188	55.6026	126.34	2.35912	198.077	1.29583	12.5965	68.4059	1317.66	695.673	25.6736	36.7721	21.9935	16.5006	44.9766	107.032	32.0239	7.15479	48.395	9.13582	5.77478	33.2403	8.77634	2.52126	0.295619	90.3627	1.19163	0.326273	0.136237
PRY	395.605	706.088	47.5114	15.4204	73.0652	3473.01	314.332	12.841	2356.54	106.445	2690.67	337.021	43.928	152.206	176.745	2526.48	22.2931	52.7265	14.6311	10.3037	2026.32	188.535	253.45	136.711	201.928	106.539	29.4671	1025.4	13143.8	1241.53	1763.92	423.967	455.251	28259.9	543.936	617.475	1618.9	239.026	3623.77	477.557	510.739	213.281	228.4	181.736	18.067	12.7415	21.1109	144.487	7.35678
PER	31.6179	128.407	5.10382	5.14371	17.0284	614.197	129.038	1.74003	881.75	13.3578	454.472	28.9602	16.3679	29.9907	21.518	378.851	2.35604	6.58216	1.21573	1.1361	273.912	20.3542	38.8786	9.1702	56.6581	6.40459	10.392	573.393	3626.32	647.026	674.814	317.445	282.533	173.015	78.6259	163.343	81.6498	168.395	61.978	32.3492	55.8972	131.846	176.396	29.9668	1.51991	0.759217	1.21217	4.54482	0.304774
SUR	11.6547	23.4317	1.51888	0.40834	4.11621	108.522	14.7062	0.559491	43.6955	6.68379	226.972	15.5551	1.77539	4.23929	6.07542	52.045	1.16752	2.0599	0.892373	0.287268	154.574	12.3585	13.3606	3.33582	25.9234	1.58707	1.48414	67.0572	313.143	31.6122	61.6346	28.6918	11.2123	30.462	8.74917	25.0143	16.9488	8.76449	12.7367	12.0221	8.03146	136.651	2.6485	1.95357	0.30848	0.244531	1.73273	0.463909	0.197294
TTO	1.24288	1.24681	0.603684	0.188516	0.105886	7.10979	1.56358	0.0341967	4.71049	0.184006	12.602	0.934196	0.0513647	0.328622	1.11709	5.10544	0.0534284	0.0887074	0.0328358	0.0222271	2.99661	0.428277	0.436698	0.0817255	0.502274	0.12417	0.0480633	12.3638	162.89	3.82327	2.64637	10.2989	1.15306	2.2177	0.724497	5.34966	1.9372	1.32731	2.20718	0.59041	0.606453	0.435045	0.31251	1.15054	0.0377186	0.0305037	0.0382775	0.0350515	0.017932
URY	14.2325	24.6842	2.0463	1.17402	8.69672	147.5	21.2906	1.25943	463.094	15.2789	103.441	20.3979	3.02317	9.6775	12.7138	142.433	2.43809	4.61848	1.358	0.71052	94.3376	15.6312	26.1467	3.4447	44.609	4.40648	2.75765	128.681	500.016	108.045	154.802	56.0987	33.9266	502.562	100.884	102.589	44.8956	26.4779	49.3364	54.5274	26.3741	217.88	11.9382	18.2549	1.32097	1.0848	1.36967	3.00323	0.898388
VEN	36.393	106.487	3.81636	0.873939	5.5192	390.011	36.4995	1.14004	769.617	9.83274	409.054	30.913	7.79498	11.6772	27.2255	339.986	1.80684	2.98711	1.20443	0.717196	231.838	17.1305	49.5478	7.92722	186.382	4.5011	2.76488	467.317	4861.78	269.095	195.244	439.08	71.1022	358.199	28.0475	314.064	70.0298	29.0925	58.4055	21.2373	39.8895	20.4005	11.8071	11.4805	1.02498	1.07587	2.83301	1.62496	0.663402
ALB	1.03075	0.428265	0.143001	0.0992202	0.255578	9.14972	0.466675	0.0534857	0.881092	0.125743	3.13312	8.43154	0.168213	0.491929	0.149442	20.0969	0.200019	0.0654222	0.180249	0.0478105	0.611802	0.615735	0.151509	0.268491	0.233628	0.154351	0.124401	1.29007	6.06841	0.826527	0.511723	0.474251	0.171166	0.219879	0.209218	0.229206	6.71153	0.223547	0.415827	0.820738	0.159351	0.12219	0.139213	0.0478128	0.0508351	0.0389939	0.0503452	0.0257034	0.0453607
AND	0.000288377	0.000153856	8.87E-05	7.66E-05	7.42E-05	0.000904864	0.000185294	8.26E-05	0.0043386	0.000125551	0.00121589	0.000131869	5.25E-05	0.00029058	0.000144678	0.000447438	9.50E-05	7.26E-05	0.000149001	7.49E-05	0.000256882	0.000310934	0.000178578	0.000182438	0.000197583	0.000124692	7.35E-05	0.000405719	0.000900912	0.000277779	0.000351635	0.000168883	0.000333291	0.000217423	0.000268022	0.000358465	0.00332798	0.000164105	0.000164276	0.000172995	0.000108364	0.000110745	0.000421241	5.23E-05	1.05E-05	8.58E-06	1.56E-05	9.17E-06	1.03E-05
BLR	258.67	864.358	35.0218	22.4141	273.962	3472.02	407.038	146.162	398.119	239.157	751.9	107.85	50.2706	1765.39	103.266	848.712	846.037	72.01	598.275	4.37153	1111.11	962.037	59.9338	82.2813	243.602	40.9616	66.8296	1042.64	1290.73	372.587	975.649	112.365	113.163	61.1694	129.015	75.1579	5162.36	82.5622	148.017	205.78	138.737	95.3519	27.5486	22.3316	7.72661	13.9053	45.6228	8.09495	3.75812
BIH	7.15296	2.2982	0.0970131	0.0842084	0.462132	21.1236	0.294697	0.0381527	1.25527	0.197714	5.40033	0.458568	14.4879	2.19786	0.204892	17.5402	0.10083	0.13228	0.10175	0.0404184	2.09002	1.27927	0.437126	0.414236	0.64681	4.84896	0.336411	2.82984	4.03159	0.707538	0.79873	0.375366	0.199614	0.150551	0.218649	0.184385	3.87109	0.382966	1.05076	0.682498	0.201685	0.233276	0.146697	0.0600343	0.0185191	0.0276452	0.0356622	0.0174364	0.0243989
ISL	0	0	0	0	0	0	0	0	0	0	0	0	0	0	0	0	0	0	0	0	0	0	0	0	0	0	0	0	0	0	0	0	0	0	0	0	0	0	0	0	0	0	0	0	0	0	0	0	0
LIE	0	0	0	0	0	0	0	0	0	0	0	0	0	0	0	0	0	0	0	0	0	0	0	0	0	0	0	0	0	0	0	0	0	0	0	0	0	0	0	0	0	0	0	0	0	0	0	0	0
MCO	0	0	0	0	0	0	0	0	0	0	0	0	0	0	0	0	0	0	0	0	0	0	0	0	0	0	0	0	0	0	0	0	0	0	0	0	0	0	0	0	0	0	0	0	0	0	0	0	0
MNE	0.191225	0.150854	0.0907356	0.0558233	0.122132	0.567688	0.184347	0.0792988	0.378525	0.0643249	0.32234	0.25556	0.167562	0.50882	0.095829	0.424889	0.273876	0.0629984	0.340731	0.0292756	0.165229	0.27226	0.0681244	0.237275	0.182806	0.171839	0.126842	0.466459	0.719184	0.206608	0.405807	0.0934272	0.0977615	0.133431	0.145787	0.122598	16.2785	0.111807	0.120069	0.309103	0.129005	0.0665098	0.0769874	0.0301074	0.0602546	0.0590694	0.103047	0.0514517	0.0972176
MDA	1.13807	0.773623	0.291362	0.234789	0.604731	3.25919	0.473746	0.19702	1.09001	0.217329	1.27415	1.14328	0.649127	1.39573	0.394643	3.56568	0.731127	0.422879	1.21528	0.127239	0.705388	0.965129	0.360284	2.07635	0.468686	0.472694	0.415533	1.76279	3.12707	0.745128	0.798914	0.370243	0.293208	0.406093	0.403436	0.318886	7.14104	0.452132	0.267367	0.944154	0.417485	0.257396	0.232621	0.0898518	0.253763	0.261339	0.266713	0.255542	0.239826
SMR	0.000179781	0.000209488	9.42E-05	6.31E-05	0.000138099	0.000633472	0.000169158	7.21E-05	0.000318434	6.21E-05	0.000314668	0.000249991	0.000147061	0.000332795	0.000107333	0.000519132	0.000187646	8.68E-05	0.000346922	7.53E-05	0.00023565	0.000265501	0.000243144	0.000418969	0.000139278	0.000177235	0.00015613	0.000570651	0.000940262	0.000279432	0.00029589	0.000141054	0.000104268	0.000172012	0.000132251	9.91E-05	0.00304215	0.000128293	0.000106578	0.000377239	0.000153232	8.03E-05	9.09E-05	3.63E-05	5.98E-05	5.44E-05	5.82E-05	5.96E-05	5.13E-05
SRB	0.282915	0.24873	0.140628	0.20577	0.215644	1.11516	0.25499	0.108291	0.571748	0.0826467	0.641952	0.441135	0.294221	0.799727	0.141786	0.782788	0.402091	0.121309	0.597338	0.0600841	0.318901	0.456948	0.114576	0.347075	0.256633	0.2505	0.215095	0.769862	1.46951	0.492633	0.608149	0.278977	0.144951	0.223676	0.201117	0.12435	16.3696	0.154155	0.385237	0.512143	0.20358	0.106803	0.113167	0.0423961	0.0992599	0.0949554	0.154775	0.0818337	0.154813
MKD	5.28331	3.71232	7.21518	1.83487	2.7376	39.5711	2.54011	0.570664	6.55231	1.60397	14.4958	28.3126	18.2287	8.06743	1.16676	52.2697	1.78948	0.793075	3.72655	0.267868	5.21753	5.787	1.14185	5.05868	3.48245	13.5884	18.3691	11.0232	17.4297	7.93319	9.19382	1.60281	1.54267	1.55645	1.91998	1.24796	39.1738	2.70549	4.58137	58.271	2.21283	1.87331	0.764456	0.356517	0.530003	0.513934	0.762933	0.39958	0.760786
UKR	472.514	239.637	121.524	28.7102	340.508	2239.98	213.737	87.9476	420.068	61.8691	460.817	96.2973	44.9419	1482.95	45.8995	907.466	361.156	16.8787	358.083	3.38999	465.114	704.163	44.1308	181.47	112.975	42.1088	181.533	457.785	782.209	135.661	362.565	120.747	97.4679	40.2139	112.876	38.3515	6195.68	48.0184	152.745	688.664	115.391	66.356	30.0327	27.7807	5.6937	40.8379	75.3891	7.0372	5.43492
DZA	1.4095	2.9541	0.0587014	0.0281477	0.884144	5.89398	0.377724	0.0253084	9.13306	0.177248	27.3132	2.04061	0.140753	0.1808	0.278906	12.0093	0.0236224	0.109677	0.0158005	0.0372415	4.39946	0.341133	1.13139	0.119462	1.30977	0.260003	0.0572743	6.14736	25.1427	1.43028	2.57439	6.1702	0.762446	2.38491	1.00414	1.01187	0.502756	0.545907	1.93338	1.78891	0.718151	0.22238	0.126513	0.0959606	0.00738151	0.0087151	0.0138678	0.0234101	0.00389702
AGO	18.0506	102.562	1.80674	0.696043	3.7294	97.6068	16.9163	1.19665	111.158	5.17882	120.678	9.25935	1.72427	8.45322	7.9799	59.1439	1.40119	2.5317	0.9219	0.622034	41.5165	12.8806	75.6055	2.72471	13.2498	2.9934	1.72344	60.1624	684.873	129.001	1479.44	48.7987	571.524	43.74	20.4296	30.4258	37.6808	16.5427	8.22939	11.2291	75.074	6.60649	10.6927	41.6456	0.602728	0.425249	0.931205	1.52419	0.458163
BEN	15.2004	7.39948	0.791262	0.154021	1.06053	19.9876	21.3976	0.228658	18.7351	1.10598	34.9935	2.04328	0.566385	2.53456	2.47031	76.1559	0.380125	0.631207	0.246666	0.146547	6.53599	3.41249	2.05481	1.04685	33.9244	0.903082	0.406079	24.9956	39.5797	6.59329	10.0067	2.42272	3.22245	3.53007	190.474	6.16452	9.83929	2.32662	2.37042	2.69048	1.59336	1.22259	5.33407	4.716	0.314073	0.117674	0.158398	2.78592	0.150321
BWA	0.125353	0.00819943	0.000631942	0.000244479	0.00201124	0.0666759	0.00578643	0.000305303	0.0149744	0.00264726	0.0407637	0.0107897	0.00106011	0.00435611	0.00907024	0.0250867	0.000470831	0.00105154	0.000342939	0.00015971	0.0542585	0.0059799	0.0115741	0.00185929	0.00535303	0.00176829	0.0152805	0.134035	0.0568713	0.0514041	0.0132044	0.00370805	0.0032134	0.0026663	0.00883171	0.00696886	0.015364	0.0041222	0.00429173	0.00550899	0.00251104	0.0860934	0.00169684	0.115064	0.000200171	0.000163042	0.0407776	0.000266523	0.000179684
BFA	0	0	0	0	0	0	0	0	0	0	0	0	0	0	0	0	0	0	0	0	0	0	0	0	0	0	0	0	0	0	0	0	0	0	0	0	0	0	0	0	0	0	0	0	0	0	0	0	0
BDI	6.60342	25.8742	0.29535	0.132644	0.993022	60.6996	5.31728	0.177313	11.2965	1.81293	37.0825	2.15731	0.349279	3.03463	1.62324	16.8221	0.380101	0.690026	0.180868	0.143126	78.2266	6.16498	1.83015	2.34917	4.23078	0.629216	0.433394	14.6122	42.8369	5.19252	4.82759	2.43841	1.35153	1.65649	2.95012	4.2435	13.6831	1.95214	9.03382	1.88923	1.36248	1.27134	0.833576	2.06836	0.158442	0.0895137	0.115098	0.124374	0.0824281
CMR	23.5571	280.676	3.17307	0.74111	20.1094	220.315	12.4451	0.610625	139.563	5.23394	670.721	34.1783	16.6945	15.907	22.3938	408.895	1.32238	18.6701	0.786052	0.502822	272.953	86.6143	51.8496	5.36503	11.9078	3.45029	5.6281	331.307	133.844	27.3819	54.6263	27.6511	13.8742	5.93198	17.0957	13.7065	25.2998	7.74074	21.8848	26.1444	32.0194	4.78332	5.02901	11.3105	0.264244	0.31412	0.465774	1.37881	0.171065
CPV	0	0	0	0	0	0	0	0	0	0	0	0	0	0	0	0	0	0	0	0	0	0	0	0	0	0	0	0	0	0	0	0	0	0	0	0	0	0	0	0	0	0	0	0	0	0	0	0	0
CAF	20.1114	58.4733	1.54356	1.50589	6.07683	57.4653	16.9005	1.07851	63.5672	4.46559	144.255	6.97664	2.72064	9.96194	8.03425	61.9565	1.4793	3.13384	1.17788	0.526911	9.54946	14.0984	12.4379	2.57541	11.7533	3.3194	2.07717	20.3863	111.412	18.9278	24.088	9.60911	6.63477	11.8526	14.4771	30.6797	41.3115	9.23171	6.90551	9.48293	8.62894	4.09651	9.50779	3.78383	0.723873	0.541822	0.730669	0.649001	0.668404
TCD	0.461976	0.390653	0.0283752	0.0118088	0.204019	1.08626	0.337131	0.0198557	0.736997	0.0732138	1.13684	0.0904413	0.0560108	0.221594	0.145605	0.814025	0.0300867	0.0535108	0.018961	0.00869061	0.14566	0.326722	0.367705	0.0375872	0.225378	0.0818696	0.0305555	0.249251	2.54449	0.300114	0.409722	0.126772	0.0971865	0.156275	0.220618	0.563356	0.928702	0.132782	0.0687606	0.165154	0.0808029	0.0685428	0.0832535	0.0599089	0.0120928	0.00920233	0.0124989	0.0111066	0.0115471
COG	36.5228	42.6299	0.95876	0.491292	10.9106	105.211	9.05481	0.433532	102.552	3.10157	162.255	11.6683	1.49509	4.34426	5.6323	225.41	0.764054	1.90424	0.454941	0.409063	185.943	9.60213	70.6633	4.24537	8.12026	1.93339	1.26354	54.2563	363.713	86.3718	132.343	11.9266	130.432	14.2886	90.5717	16.6663	18.2641	10.0431	9.4694	21.6261	87.2263	10.9781	35.1591	3.33071	0.281253	0.221638	0.373365	0.772909	0.196615
CIV	292.874	2112.03	24.5582	6.07266	200.684	2266.62	69.5409	81.2995	1800.97	29.9228	9390.1	373.438	236.203	226.429	69.6534	1728.03	25.9903	39.3881	5.53666	4.66796	1797.58	796.74	434.301	66.2958	75.4154	62.4574	161.308	1254.04	3010.64	209.105	203.612	260.078	63.7998	94.9407	2633.03	88.6739	563.66	143.866	150.279	90.5503	31.0219	108.685	61.6254	111.764	1.95055	2.73673	5.98726	4.93673	1.00034
COD	75.059	685.629	5.30068	3.29593	12.6117	341.412	53.3187	3.32866	159.49	490.601	380.264	32.0667	16.4164	29.5256	26.7504	559.281	10.771	35.7245	3.14537	1.71735	146.26	45.7137	50.7766	9.40775	44.2415	10.3355	5.1657	222.143	1350.27	354.369	108.536	34.9971	30.7843	26.9216	59.8152	74.1464	153.36	37.2854	90.9316	37.9332	18.9503	17.4546	13.7525	104.921	1.6216	1.45433	2.00339	1.87319	1.55387
DJI	0	0	0	0	0	0	0	0	0	0	0	0	0	0	0	0	0	0	0	0	0	0	0	0	0	0	0	0	0	0	0	0	0	0	0	0	0	0	0	0	0	0	0	0	0	0	0	0	0
DOM	10.6215	147.951	0.527131	0.574784	12.6295	116.989	4.33492	0.230677	188.851	7.40124	86.1935	5.09987	1.01094	2.30603	2.58629	94.1758	0.373339	0.692764	0.233906	0.655532	66.9147	3.25736	4.27026	0.996965	7.56915	0.943763	2.76947	189.148	1025.31	58.0125	17.7733	72.8429	12.815	5.15191	2.97988	29.5608	9.18391	6.11241	43.6978	28.9631	4.68363	3.44356	1.13415	1.17988	0.135849	5.37826	0.20352	0.19993	0.0733006
ERI	0	0	0	0	0	0	0	0	0	0	0	0	0	0	0	0	0	0	0	0	0	0	0	0	0	0	0	0	0	0	0	0	0	0	0	0	0	0	0	0	0	0	0	0	0	0	0	0	0
ETH	58.7183	151.023	13.1396	5.25573	29.8887	781.099	46.4663	3.66464	193.682	31.1853	542.134	115.234	22.8906	40.1356	85.5791	379.435	10.3383	16.1074	4.48423	5.91998	228.4	85.3248	49.9363	43.8669	54.6073	13.1779	32.8735	300.605	715.668	683.713	167.22	84.5692	73.7126	81.0055	219.324	69.9322	244.644	78.2977	91.9007	146.792	44.8752	53.3287	72.3167	41.1117	4.5223	4.04992	5.51615	4.59427	5.1373
GAB	42.1615	17.6959	1.28321	1.0316	2.18143	51.2427	5.53272	0.443536	48.1447	2.41724	302.824	12.2646	1.5437	2.93507	7.72403	129.52	0.467149	1.37783	0.29184	0.305206	43.3436	9.16287	27.3272	2.51078	5.61432	1.46024	0.87742	32.8785	213.732	21.8018	101.816	8.92749	38.7476	4.05362	21.787	8.6564	8.69293	5.59634	7.65593	16.1007	6.98124	4.49725	2.23262	7.6502	0.176507	0.158809	0.271445	0.413653	0.145531
GMB	0.0622936	0.171313	0.0200747	0.00182502	0.00713265	0.510672	0.102976	0.00222444	0.134425	0.0114256	0.149083	0.012294	0.00433767	0.0201338	0.0220652	0.143447	0.00273046	0.00634974	0.002231	0.00118094	0.04419	0.0258298	0.016048	0.00576643	0.0315296	0.00682723	0.00425312	0.359913	0.26815	0.0611861	0.0466106	0.0157564	0.0280594	0.0183635	0.657445	0.0603949	0.0573962	0.017709	0.0113075	0.0190133	0.0113117	0.0108282	0.00916639	0.010598	0.00102002	0.000828472	0.000973536	0.0015831	0.000713121
GHA	47.7024	258.782	7.26319	1.92131	15.6567	484.062	65.3452	10.942	274.875	30.701	895.526	171.432	18.3056	14.6381	78.1293	757.405	2.54667	53.5627	1.57543	1.63322	473.623	43.0602	42.3059	12.0532	68.8584	7.17416	9.90868	1147.48	792.941	375.378	371.386	89.5132	71.9438	15.101	539.095	28.8632	64.9945	54.4102	132.494	60.2393	24.5234	29.8539	23.114	20.0392	0.816001	1.09599	1.07502	2.10279	0.931223
GIN	9.14738	37.0665	3.42339	0.203845	5.55655	28.3706	4.78677	0.286559	46.3136	1.20255	62.2432	4.5296	1.27634	10.9905	48.8644	26.7774	9.66875	0.703591	0.309662	0.400543	6.41295	11.9147	3.72162	1.72682	3.33468	1.08948	1.4515	9.51344	39.7583	17.8281	7.71673	24.4124	26.9292	1.95798	8.83501	5.83199	32.3238	2.0847	6.49668	3.21351	1.71435	1.44412	2.43934	1.05762	0.16846	0.134382	19.9274	0.893037	0.117633
KEN	24.2291	103.208	2.26882	1.44107	7.61862	279.76	26.4114	22.6315	82.3851	15.7492	215.608	23.6846	2.58796	6.61536	25.9873	121	2.47394	12.0237	0.754179	1.18776	511.82	45.6215	19.7695	7.56167	31.4101	2.48252	3.43142	868.589	248.982	128.156	100.454	48.6453	16.9789	10.9877	379.204	14.3299	202.297	36.3152	30.2281	95.8561	6.83573	17.7674	25.1126	21.4284	155.501	0.616314	0.762676	4.2621	0.459163
LSO	0.00444171	0.00622314	0.000442524	0.000288635	0.00123339	0.0165441	0.00407922	0.000271778	0.0252553	0.00147498	0.0562192	0.00788282	0.000869374	0.00235239	0.00407217	0.0208539	0.00135105	0.00208997	0.000343883	0.000454805	0.00337483	0.00356112	0.00520055	0.00177309	0.00315195	0.000856588	0.000598329	0.0154148	0.0607707	0.00679938	0.00799231	0.00340683	0.00705893	0.00487603	0.0153657	0.00531876	0.00660779	0.0061123	0.00172161	0.00338482	0.00522163	0.00153929	0.00188127	0.0432727	0.000383028	0.000340226	0.000377686	0.000425266	0.000323621
LBR	26.4295	54.29	2.21866	1.20716	19.6793	320.252	24.5646	1.57034	95.2344	16.1676	113.315	29.8751	11.6969	12.5266	11.0834	147.32	3.2007	6.42376	1.8354	1.07747	19.6324	22.5384	16.0728	5.20659	16.9782	4.47244	3.55813	49.6504	182.625	31.9554	71.4335	17.1966	26.6446	14.1151	98.5442	29.1543	115.47	22.6736	21.2285	19.7206	8.94112	599.018	9.28088	8.36369	0.964269	496.561	1.24589	1.43285	1.00832
LBY	0.0546472	0.020656	0.00202113	0.00773283	0.00563078	0.413911	0.00695239	0.000980859	0.327524	0.00369715	0.116609	0.0625676	0.0141928	0.00639032	0.00477599	1.08808	0.000708321	0.00187541	0.000492989	0.0103963	0.0588511	0.0120296	0.059223	0.00474348	0.0192191	0.00768215	0.0021102	0.159446	0.135465	0.071726	0.0345818	0.0096559	0.0148025	0.00785726	0.0288835	0.0101706	0.0155311	0.00832659	0.137728	0.214471	0.00596835	0.00522123	0.00585879	0.0021833	0.000223298	0.00026604	0.00112166	0.000510597	0.000102299
MDG	109.762	114.202	6.28981	1.45991	13.9874	663.613	32.0086	126.861	139.339	16.1877	2224.92	42.7998	17.4747	15.9133	16.6599	382.926	2.64946	6.1438	8.0949	0.966028	119.802	38.4891	32.3181	9.08027	33.4375	7.67862	4.77871	325.734	2148.22	278.002	484.274	171.958	34.3975	103.99	166.629	38.3377	47.332	47.3578	92.204	55.8887	24.8055	14.5138	39.9184	37.7347	1.43941	0.72086	0.83664	6.02767	0.326499
MWI	10.5169	27.0259	0.950708	0.437702	6.41901	94.9875	13.6778	0.418896	37.1924	3.35908	127.744	16.3983	2.64289	8.63603	6.243	42.244	1.30619	3.17786	0.462165	0.412651	128.523	19.8343	27.7785	3.62502	11.1389	1.63521	4.47728	488.046	120.346	98.1207	41.0579	11.8718	5.5146	3.97764	61.5098	10.0204	51.2852	21.6103	23.0122	7.36532	3.89569	3.52855	4.03095	195.651	0.436549	0.272238	0.38905	0.594211	0.304722
MLI	0.0509958	0.0808345	0.00431353	0.00147888	0.0204157	0.315007	0.0374883	0.00282109	0.513589	0.0101235	1.50503	0.164327	0.00482579	0.0219904	0.0441414	0.597216	0.00323841	0.00843855	0.00201803	0.00127532	0.0613286	0.0375128	0.04083	0.00843328	0.0350044	0.00801088	0.00503634	0.212847	1.00032	0.0904381	0.0698513	0.0795757	0.0482054	0.0272455	0.121211	0.0707798	0.0962998	0.0275348	0.029481	0.0237706	0.0169292	0.0227898	0.0208117	0.0170697	0.00148298	0.00116437	0.00174302	0.00219862	0.00118109
MRT	0	0	0	0	0	0	0	0	0	0	0	0	0	0	0	0	0	0	0	0	0	0	0	0	0	0	0	0	0	0	0	0	0	0	0	0	0	0	0	0	0	0	0	0	0	0	0	0	0
MUS	0.182021	0.680245	0.0123895	0.0100462	0.0436984	1.42756	0.116612	0.00883534	1.08165	0.0621513	7.50259	0.0959601	0.0344149	0.0586754	0.204317	1.25283	0.00861495	0.0318833	0.005543	0.00857179	0.335331	0.115411	0.618507	0.0299522	0.321741	0.039257	0.0158142	13.3691	1.99879	2.44082	1.21898	0.491287	0.200119	1.81963	0.47471	0.294116	0.316204	0.26591	0.418371	0.0806464	0.0604563	0.082289	0.0786428	0.247563	0.00550009	0.00418054	0.00585266	0.00964543	0.00368839
MAR	1.48772	6.28578	0.187128	0.0852057	1.05281	12.3041	0.56996	0.207685	52.2468	1.47604	62.8719	1.94396	0.331322	0.688573	1.04083	20.4745	1.15564	1.80484	0.139343	0.215211	14.7199	1.41269	10.5538	0.287438	1.93359	0.330852	0.550783	12.3969	9.89715	11.2856	2.72704	4.39862	2.41016	1.37548	2.48759	0.839535	10.8686	1.63047	2.78063	6.21781	0.397429	1.11192	0.175016	0.463384	0.0152588	0.0275929	0.0270234	0.0373463	0.00335536
MOZ	112.72	164.129	7.10476	2.43829	13.4492	391.055	79.3712	3.69932	1158.66	19.2452	367.808	27.4882	6.15398	40.6187	30.5033	284.807	6.7272	9.17903	3.95415	1.89106	680.29	74.4153	480.879	9.80186	53.5867	14.2621	6.46908	232.448	797.245	8865.77	988.046	50.0612	48.3423	382.946	1645.66	101.823	214.207	45.4558	46.1403	115.96	30.2676	18.3378	143.078	949.335	3.25866	1.52956	2.37007	21.6494	1.65365
NAM	0.466114	0.763518	0.0308894	0.00755856	0.0648411	2.57896	0.428769	0.0134641	19.2419	0.0651317	3.06067	0.150629	0.0616102	0.110988	0.0647083	2.16145	0.193344	0.020313	0.00878968	0.00581535	0.918332	0.199513	0.494381	0.0259354	0.15654	0.0357968	0.0461193	1.54136	2.43934	5.42626	2.75653	0.474614	0.896932	0.335574	0.148802	0.200197	4.31876	0.713371	0.173318	0.109012	0.10197	0.221538	0.32815	4.50773	0.00353398	0.00356222	0.0103023	0.00718308	0.00208958
NER	0	0	0	0	0	0	0	0	0	0	0	0	0	0	0	0	0	0	0	0	0	0	0	0	0	0	0	0	0	0	0	0	0	0	0	0	0	0	0	0	0	0	0	0	0	0	0	0	0
NGA	16.0891	29.117	0.516654	0.183273	2.71953	108.515	3.63227	0.322709	50.682	1.2341	86.3226	76.4305	2.33804	1.62337	3.15896	38.4932	0.670574	0.94196	0.171165	0.144576	51.1725	4.91707	31.9531	1.17463	38.8854	0.603337	0.499113	50.396	179.204	75.944	35.8131	40.9662	11.7892	19.6229	71.644	7.56301	13.916	25.5764	51.6733	12.3455	8.52679	1.46687	39.9514	44.587	0.0855288	0.0903318	0.150814	1.33122	0.0423454
RWA	2.84597	8.44876	0.177625	0.0919602	0.829457	14.9424	2.74199	0.106214	8.45834	0.540073	8.93394	2.45118	0.275137	1.41011	1.19526	10.9025	0.454174	0.606279	0.132279	0.133608	26.777	1.79921	1.33257	3.05139	1.71504	0.356787	0.473836	8.92026	17.7463	2.20838	3.07291	0.837959	0.822698	1.30712	4.96483	2.40544	3.64725	1.73391	0.779164	1.24493	0.608976	0.568148	0.570066	1.63103	0.140176	0.0953574	0.132271	0.133632	0.0972064
STP	0	0	0	0	0	0	0	0	0	0	0	0	0	0	0	0	0	0	0	0	0	0	0	0	0	0	0	0	0	0	0	0	0	0	0	0	0	0	0	0	0	0	0	0	0	0	0	0	0
SEN	0.0436824	0.214748	0.00432831	0.00135334	0.00703788	0.254919	0.0378286	0.00174309	0.368727	0.0109333	1.33931	0.172175	0.00647197	0.0166848	0.0396971	0.853414	0.00286848	0.00846591	0.00179389	0.0020285	0.18189	0.0285258	0.0908267	0.00671825	0.0307118	0.00829412	0.00382434	0.23963	0.487187	0.150011	0.41995	0.0512362	0.0529126	0.0166122	0.165208	0.114243	0.0643936	0.0211565	0.0539023	0.023929	0.00997291	0.0128842	0.0102237	0.0100913	0.000982096	0.0015245	0.00156791	0.0016168	0.000693834
SYC	0	0	0	0	0	0	0	0	0	0	0	0	0	0	0	0	0	0	0	0	0	0	0	0	0	0	0	0	0	0	0	0	0	0	0	0	0	0	0	0	0	0	0	0	0	0	0	0	0
SLE	10.8183	15.9511	0.624336	0.217221	15.9889	33.9653	7.22496	0.450339	15.8127	1.45525	120.43	35.011	0.455209	4.23171	4.60854	21.145	0.626337	0.776018	0.39913	0.211484	3.50727	5.42969	2.03497	0.767141	6.22429	1.47501	2.81217	23.2894	61.7299	6.5161	9.20808	56.0758	2.11634	3.07051	20.0194	10.6312	20.4242	2.72116	2.95594	3.57986	1.65316	1.68191	1.40744	9.99574	0.207949	0.152482	0.200848	0.264182	0.159833
SOM	0.202038	0.257556	0.0320764	0.00778577	0.0277777	0.671521	0.530104	0.00864833	0.47426	0.042112	0.936818	0.060151	0.0163071	0.0947399	0.0875001	0.544107	0.0302495	0.0364888	0.0149897	0.0511649	0.192462	0.0979365	0.0505104	0.0424024	0.109666	0.0272107	0.018152	0.953683	1.99702	0.531365	1.2183	0.151501	0.717251	0.0711771	0.359116	0.213137	0.274556	0.311864	0.15576	0.162552	0.126231	0.42892	0.246271	0.0569235	0.00761822	0.00415329	0.00586448	0.0947551	0.00344636
SDS	0	0	0	0	0	0	0	0	0	0	0	0	0	0	0	0	0	0	0	0	0	0	0	0	0	0	0	0	0	0	0	0	0	0	0	0	0	0	0	0	0	0	0	0	0	0	0	0	0
SUD	0	0	0	0	0	0	0	0	0	0	0	0	0	0	0	0	0	0	0	0	0	0	0	0	0	0	0	0	0	0	0	0	0	0	0	0	0	0	0	0	0	0	0	0	0	0	0	0	0
SWZ	9.57093	17.2669	1.01274	0.755511	3.07083	39.9445	7.30228	0.60082	138.121	12.3759	72.2969	17.7465	3.37748	5.01643	9.76566	127.589	2.38113	4.09486	0.733134	0.862451	20.9339	13.6362	13.8501	5.15124	7.67177	1.72354	1.68055	80.1326	197.854	245.758	48.2508	11.2069	145.784	9.88861	82.1542	34.3717	17.0511	32.7412	4.99834	9.21397	16.9901	4.71825	154.563	30.0705	6.10822	0.847558	1.25483	3.54687	1.34403
TGO	5.02002	17.1067	0.60676	0.194661	0.911945	72.8401	4.33983	0.182166	28.4786	1.0649	70.9998	2.36756	2.15965	1.80334	3.0976	38.8239	0.252251	0.622851	0.190948	0.142963	23.3334	3.22893	16.4544	1.17169	4.92491	0.664636	0.376757	28.3673	42.7668	8.65639	6.95713	15.8676	3.72084	1.96077	15.2981	5.18376	23.1246	1.99091	13.8349	2.28879	1.70614	1.10535	2.63339	5.89546	0.140739	0.101479	0.14052	1.4892	0.0999953
TUN	0.973944	1.61951	0.0600053	0.110152	0.185285	5.49306	0.231303	0.0134344	4.28589	0.134582	19.9689	0.724145	0.106605	0.212864	0.261016	16.3754	0.0190289	0.503579	0.0123987	0.0635527	1.40593	0.366335	0.758456	0.174749	0.526507	0.0831547	0.0939388	2.76037	2.95025	1.91002	0.575983	0.673739	0.234678	0.299877	0.778352	0.198823	0.441303	0.294957	1.25053	0.988921	0.143918	0.260209	0.268381	0.142614	0.00631984	0.00719511	0.0153602	0.0485704	0.00234217
UGA	23.2529	82.0848	2.86069	1.51633	10.609	148.897	16.9245	0.539906	107.753	4.43086	117.733	16.079	3.55956	24.6422	6.93678	143.484	2.14544	4.24263	0.642357	0.825174	460.393	35.3545	29.9366	8.21386	14.7874	4.36403	4.72636	127.01	145.213	169.275	28.8332	15.9063	7.39025	5.50712	24.3029	12.0932	25.2318	57.5975	87.3135	12.3222	6.31242	8.06246	4.6522	5.59237	1.1823	0.402068	0.569768	92.2165	0.446169
TZA	140.558	483.551	34.256	5.48328	41.6025	1861.45	110.151	3.23579	400.693	46.5909	754.003	232.359	8.95278	133.146	42.0097	597.888	5.63178	15.5016	3.47505	3.76374	1763.59	209.555	111.965	31.946	122.796	11.7338	33.2448	1206.36	3432.34	2695.77	511.143	125.348	160.83	107.373	3034.27	140.603	143.717	145.877	160.184	145.422	45.5276	94.0288	165.414	91.3056	10.1003	6.48684	4.92111	19.9514	2.7386
ZMB	65.0667	177.379	4.64076	2.17985	13.0981	1125.84	54.8653	2.8854	159.007	447.062	317.976	22.6194	8.75202	22.5193	32.0364	209.837	5.13373	6.74317	2.28795	1.26819	340.227	40.1844	62.2007	7.41727	51.1865	8.63549	4.87463	1027.18	506.747	457.839	231.039	50.9093	43.6372	63.9461	262.024	51.8529	99.9424	44.7795	48.1307	27.8998	32.8147	54.5321	24.1166	598.344	2.03549	1.10293	1.9684	4.47341	1.05354
ZWE	10.5087	24.0101	3.84828	0.456651	5.202	108.757	12.3097	0.687819	99.9323	9.3739	69.7314	8.91823	2.99956	4.10324	10.2742	42.5244	1.23336	9.56923	0.518334	0.456921	109.969	8.55437	24.8562	2.81314	13.1474	1.49081	1.33307	276.383	213.024	68.5288	32.5678	10.9387	16.7189	7.62277	36.0798	9.93504	16.8945	24.0206	13.5459	8.47676	6.71635	9.36808	5.41651	418.196	0.477402	0.83275	1.02188	1.36296	0.415372
BHR	0	0	0	0	0	0	0	0	0	0	0	0	0	0	0	0	0	0	0	0	0	0	0	0	0	0	0	0	0	0	0	0	0	0	0	0	0	0	0	0	0	0	0	0	0	0	0	0	0
EGY	0.0355331	0.07089	0.0123	0.0683833	0.0199189	0.381491	0.0217994	0.00155542	0.318489	0.0181738	0.315191	0.128318	0.00728784	0.0131893	0.0155742	0.479999	0.00256834	0.00327832	0.00175226	0.0106347	0.167224	0.0240161	0.0488106	0.0289897	0.0535286	0.00800154	0.00411335	0.356449	0.511396	0.130137	0.0922552	0.0523753	0.0489674	0.0211978	0.0459198	0.0275148	0.124995	0.0300555	0.0393695	0.146606	0.0144628	0.0245921	0.0295637	0.0276431	0.00045305	0.000742463	0.00124157	0.0346952	0.000143329
IRN	0.388421	0.443984	0.0495921	0.0350665	0.133482	3.50968	0.250743	0.0240528	2.97346	0.124957	2.0867	0.774818	0.047942	0.22639	0.16833	3.08222	0.050956	0.354044	0.0199483	0.0398646	0.753872	0.249845	0.287983	0.16313	0.933937	0.0502991	0.0826919	0.944802	4.17279	2.33312	2.66588	0.571715	1.04956	0.175906	1.84794	0.421771	1.38319	0.333028	0.52059	1.17391	0.282633	0.226333	0.265567	0.960004	1.3005	0.615147	0.735087	0.115186	0.00606602
IRQ	0.0419349	0.00811336	0.00261893	0.000461699	0.0038698	0.0380747	0.00638286	0.000236523	0.0936344	0.00151451	0.0693158	0.0147596	0.00657751	0.00263321	0.00335413	0.130242	0.000377641	0.000833331	0.000218362	0.000678199	0.0308505	0.00340723	0.00972634	0.00315192	0.002945	0.00108803	0.000669004	0.0156823	0.229926	0.0302537	0.04582	0.0720667	0.0173855	0.0121401	0.0063773	0.00811728	0.0135676	0.00985809	0.0030871	0.0108921	0.00661044	0.0020431	0.00354001	0.0013682	0.000179586	0.000151239	0.000365556	0.000347021	8.25E-05
ISR	0.0887419	0.324325	0.0163686	0.0477675	0.0585353	0.913896	0.0632326	0.00547722	0.414531	0.073518	0.790371	0.18908	0.0222429	0.0520703	0.0984101	0.650848	0.0085676	0.0300582	0.0136607	0.0112577	0.482439	0.131133	0.0374317	0.0522771	0.112261	0.0153554	0.021863	0.849049	2.24842	0.252728	0.267196	0.224548	0.0959755	0.0736625	0.152341	0.118788	0.208964	0.107104	0.224401	0.288113	0.0488875	0.116799	0.033994	0.0671806	0.00113972	0.00262289	0.00350957	0.00244154	0.000512595
JOR	0	0	0	0	0	0	0	0	0	0	0	0	0	0	0	0	0	0	0	0	0	0	0	0	0	0	0	0	0	0	0	0	0	0	0	0	0	0	0	0	0	0	0	0	0	0	0	0	0
KWT	0	0	0	0	0	0	0	0	0	0	0	0	0	0	0	0	0	0	0	0	0	0	0	0	0	0	0	0	0	0	0	0	0	0	0	0	0	0	0	0	0	0	0	0	0	0	0	0	0
LBN	0.123031	0.225866	0.0284293	0.0616933	0.0226928	0.619773	0.109608	0.00529639	0.333581	0.0255727	0.700435	0.249221	0.0108704	0.0496637	0.060985	0.434034	0.00867606	0.0197259	0.0046635	0.00793423	0.109757	0.0631907	0.0311927	0.0912766	0.0944029	0.0150725	0.00927782	0.403512	1.64177	0.132441	0.169511	0.167083	0.0464369	0.0716504	0.111959	0.133495	0.357682	0.13883	0.860024	1.14859	0.0316526	0.0671951	0.0402771	0.0285146	0.00795857	0.0624918	0.00927039	0.00498242	0.00174551
PSE	0.00306953	0.00812071	0.000159141	6.94E-05	0.000308568	0.0153291	0.00189281	0.000108316	0.00472907	0.000447982	0.0117918	0.000589148	0.000104066	0.000940038	0.00107944	0.0175856	0.000169806	0.000624959	9.53E-05	0.000318313	0.00731047	0.00111455	0.000311678	0.000254699	0.000858508	0.000686029	0.000153317	0.00463133	0.0329217	0.00251267	0.00314711	0.000906658	0.00476025	0.000891811	0.00137766	0.00295174	0.0061255	0.000809276	0.00117514	0.00184059	0.000589755	0.000450306	0.000478589	0.000422033	4.27E-05	3.15E-05	6.02E-05	5.48E-05	2.61E-05
OMN	0	0	0	0	0	0	0	0	0	0	0	0	0	0	0	0	0	0	0	0	0	0	0	0	0	0	0	0	0	0	0	0	0	0	0	0	0	0	0	0	0	0	0	0	0	0	0	0	0
QAT	0	0	0	0	0	0	0	0	0	0	0	0	0	0	0	0	0	0	0	0	0	0	0	0	0	0	0	0	0	0	0	0	0	0	0	0	0	0	0	0	0	0	0	0	0	0	0	0	0
SAU	0	0	0	0	0	0	0	0	0	0	0	0	0	0	0	0	0	0	0	0	0	0	0	0	0	0	0	0	0	0	0	0	0	0	0	0	0	0	0	0	0	0	0	0	0	0	0	0	0
SYR	0.07502	0.102312	0.0728188	0.102714	0.024912	0.854928	0.062298	0.00190183	0.444506	0.0176962	0.479239	0.212261	0.0203771	0.0237703	0.0254317	1.03402	0.00319373	0.00916744	0.0027314	0.00719121	0.587198	0.0295851	0.0797688	0.10257	0.0453368	0.00716521	0.0151881	0.289061	1.00405	0.159619	0.135959	0.105757	0.104902	0.138579	0.220047	0.107549	0.314647	0.0557042	0.147107	1.0288	0.0472027	0.0208603	0.0298715	0.0236739	0.00154206	0.00408214	0.0156161	0.0359083	0.000741008
ARE	0	0	0	0	0	0	0	0	0	0	0	0	0	0	0	0	0	0	0	0	0	0	0	0	0	0	0	0	0	0	0	0	0	0	0	0	0	0	0	0	0	0	0	0	0	0	0	0	0
YEM	0	0	0	0	0	0	0	0	0	0	0	0	0	0	0	0	0	0	0	0	0	0	0	0	0	0	0	0	0	0	0	0	0	0	0	0	0	0	0	0	0	0	0	0	0	0	0	0	0
tot	19659.2	33767.7	5376.32	981.122	8933.38	133013	14493.4	5579.13	72970.9	52851.1	100658	14566.1	3696.66	13246.8	14828.8	85442.3	7740.5	2539.65	9772.6	420.984	63832.3	28011.1	20168.3	9651.37	55039	3325.48	4209.55	121997	1.71159e+06	179258	308518	334770	49816.2	2.48139e+06	69931.1	169618	268246	98731.6	17910	31888.5	37201.6	21988.9	308485	69099.6	791.662	1689.21	3161.43	7462.26	239.76
[truncated: 140 more columns]

## Sheet: 2004
GID	AUT	BEL	BGR	CYP	CZE	DEU	DNK	EST	ESP	FIN	FRA	GRC	HRV	HUN	IRL	ITA	LTU	LUX	LVA	MLT	NLD	POL	PRT	ROU	SWE	SVN	SVK	GBR	USA	JPN	CHN	CAN	KOR	BRA	IND	MEX	RUS	AUS	CHE	TUR	TWN	NOR	IDN	ZAF	AFG	ARM	AZE	BGD	BTN
AUT	6573.54	58.7734	11.1302	2.19084	116.562	1351.06	28.9306	3.1302	215.422	23.0576	426.926	94.0711	68.8008	180.967	29.5856	1512.96	6.60889	4.1236	4.92221	3.01744	79.9514	119.229	38.2228	57.4294	61.5973	70.6305	46.1503	402.315	607.869	278.193	118.98	72.3346	33.2162	21.2493	31.338	43.1684	108.593	55.7947	168.182	83.5258	33.0655	32.2041	8.93532	10.9605	0.679152	1.2339	1.88947	1.3214	0.555719
BEL	26.0286	1546.2	1.94116	0.955987	14.3944	379.248	18.8412	0.982135	134.654	12.9983	694.283	26.9048	3.85195	14.0556	31.4239	175.118	2.29091	2.13126	1.37258	0.592677	200.89	29.4658	22.8398	7.34797	36.1226	3.15993	5.14745	392.046	283.771	36.2906	68.5556	29.1332	18.4965	14.1759	25.4891	21.369	30.6563	27.9831	27.3599	36.7418	6.86988	18.1181	5.65746	6.30284	0.237676	0.493794	0.539898	0.788542	0.0615409
BGR	67.6812	31.9544	3581.69	6.51137	54.5954	269.767	15.7462	1.69968	82.5009	8.82023	155.319	576.329	16.1555	61.4883	16.0452	417.591	6.56112	1.75135	3.67371	1.23758	32.0313	74.3341	15.3111	65.1733	39.5493	16.8787	11.66	151.128	215.895	29.8456	40.5514	21.0436	17.1127	15.2452	23.605	14.7392	74.7931	19.1332	21.1892	474.806	15.4343	16.9792	10.6406	4.28485	2.50922	9.05559	8.40259	2.37621	0.8024
CYP	0.115762	0.132573	0.0404559	25.4687	0.0783772	0.440761	0.122983	0.0163199	0.171284	0.0709862	0.206796	1.41556	0.0410323	0.0749392	0.0895598	0.297123	0.0109087	0.0271927	0.0286994	0.0246449	0.106041	0.0831279	0.0794865	0.0558859	0.156662	0.0333646	0.0481105	0.810577	0.503796	0.284446	0.195604	0.108524	0.104148	0.0800087	0.164061	0.0912214	0.15422	0.112733	0.0880863	0.238603	0.0914214	0.15629	0.0624171	0.0576618	0.00381125	0.0405854	0.00408907	0.00844733	0.00245016
CZE	530.283	92.0127	19.0668	1.70132	6348.1	1758.61	48.2482	4.94733	148.404	27.1149	310.9	75.9923	40.3147	205.789	23.7315	501.386	15.2912	5.49243	9.66103	1.20231	109.908	310.335	24.3861	107.185	79.161	49.4692	324.064	394.758	454.667	93.6599	83.4133	34.7363	25.1281	16.2981	32.0317	27.5231	176.793	89.2983	65.9284	49.4248	26.5942	43.2963	11.6058	10.2296	1.03137	1.27883	3.76095	1.72585	0.417814
DEU	865.039	641.261	38.7103	8.88691	396.218	20861.5	374.915	21.5562	1039.8	151.622	2785.74	328.808	82.0924	305.218	160.637	1752.16	35.5146	38.8124	27.8045	6.99691	776.231	702.662	170.655	142.041	416.054	65.1554	107.268	2179.72	2803.33	439.518	598.957	229.053	157.282	125.091	214.76	156.328	572.469	244.173	631.78	386.942	163.313	206.129	44.1282	61.5003	2.68549	3.66585	8.92561	6.26008	0.489334
DNK	12.9713	13.2687	0.717291	0.256902	8.3326	193.241	1214.33	0.8881	28.4353	13.7966	71.8017	6.0728	2.63711	8.28055	15.0199	36.136	1.94249	1.05828	1.93162	0.206353	27.042	18.383	13.2897	1.90173	110.083	1.32373	2.42589	121.972	77.0917	21.2325	23.2718	8.23865	6.42367	3.36126	7.44748	4.11749	9.81023	9.90802	12.6856	5.46226	6.56383	79.2781	1.75568	1.66892	0.116707	0.102879	0.295883	0.341469	0.0362393
EST	71.0943	79.7374	6.69516	1.84047	76.1766	894.477	373.921	8385.1	153.974	1035.55	348.102	39.904	20.5237	45.2995	191.958	268.069	66.6678	4.23709	131.325	1.71963	154.93	139.159	40.1457	16.3156	832.16	11.5751	22.105	1123.45	760.827	162.582	155.663	52.1777	76.2107	21.7842	45.9645	27.1252	309.783	106.502	47.4441	53.9887	45.3806	793.206	15.2635	10.1114	1.58836	2.02097	6.80692	2.39548	2.0106
ESP	84.0928	211.89	13.6664	6.46522	46.8446	1000.3	57.2719	4.11792	29760.4	48.1083	2427.04	188.64	20.9708	46.5474	104.296	1080.16	7.84298	13.8645	6.11222	6.68411	221.675	122.434	1543.77	41.8615	111.317	19.4479	14.395	1190.6	1492.58	189.301	235.377	109.517	78.1053	83.1994	82.2848	213.377	170.508	104.577	98.9644	187.827	56.5857	83.1746	22.9586	31.4291	1.10722	1.72748	3.09405	3.68045	0.310941
FIN	825.571	1552.91	72.5499	33.5454	392.787	8275.95	1529.86	277.957	4302.21	58914.6	5899.86	1057.52	108.769	503.055	947.143	3634.35	135.442	86.221	164.582	12.0889	1809.1	1340.31	531.54	181.751	2754.58	82.5681	175.329	10648.5	9821.99	3847.37	2382.64	802.073	586.993	449.28	740.561	521.187	2854.16	1254.23	714.504	1057.66	695.219	1780.02	160.205	191.542	7.91751	11.7102	27.1112	22.5118	1.60649
FRA	311.626	1364.44	27.2249	9.06236	154.057	3446.6	216.289	8.40943	3405.16	109.369	37596.8	363.664	55.8385	161.7	231.976	3064.41	16.396	78.5414	11.3555	11.456	819.172	359.996	464.621	109.336	292.572	51.7986	41.5151	3521.36	3318.88	515.86	621.562	287.223	206.315	211.986	227.364	187.175	360.094	341.141	620.328	363.749	175.699	139.127	54.5828	88.8444	2.65346	4.51567	7.3216	8.41296	0.450566
GRC	11.2358	12.2159	28.7843	20.267	6.42327	73.9052	7.04748	0.670015	32.2743	4.61632	41.8357	3781.65	5.14283	11.2487	5.66054	89.5306	1.29161	1.41695	0.915994	2.66132	18.7396	12.524	7.34799	24.9694	13.4031	2.56399	2.21089	62.0099	78.6902	20.7781	25.1119	13.9992	11.0382	4.24774	9.07675	7.66487	35.7658	16.0987	10.7571	74.05	4.69906	9.50759	3.80025	4.9992	0.903022	7.65466	1.99854	0.364874	0.124773
HRV	83.3266	29.4902	4.97515	1.98341	25.7811	252.536	20.3319	1.07168	68.7219	12.8552	109.026	32.4837	2604.19	116.054	9.46871	705.564	1.94089	2.46513	1.79988	0.815506	22.8926	33.7067	11.0118	37.785	32.1184	216.541	14.2027	82.9535	143.367	24.8086	35.3785	18.8598	11.2479	8.08244	14.9345	10.6714	44.8097	13.9755	32.7821	33.9622	11.8624	17.1248	4.8829	3.92813	0.383502	0.419472	2.3648	0.41042	0.205656
HUN	402.532	69.8923	32.0082	2.01606	175.799	1088.68	93.8553	9.05634	167.982	28.2141	353.859	90.0568	189.403	5465.94	21.8199	695.184	14.2636	4.39156	10.1578	1.12475	99.8704	248.443	27.3812	280.346	80.6821	88.3175	121.956	271.739	310.089	65.9744	89.4286	30.2521	25.0579	16.393	31.6269	21.602	316.834	36.1752	63.5697	95.9108	29.6363	53.9387	11.5326	11.0035	0.776412	1.38012	4.2775	1.28999	0.588281
IRL	20.4084	59.4473	2.36231	1.17402	14.8434	263.582	35.5827	1.64506	117.687	19.1062	190.055	18.2058	3.69766	24.7206	2590.12	111.055	2.115	5.33869	2.06554	1.17515	73.3187	21.7863	14.4956	6.30527	79.2223	2.9525	6.4772	1660.46	406.051	49.6232	70.6526	25.9407	29.9416	12.0235	31.7114	17.5633	32.7431	35.1669	29.4751	26.9273	18.7966	51.7906	8.06343	12.4872	0.696888	0.486669	1.16212	1.00591	0.317889
ITA	77.4018	66.115	9.61918	2.97667	28.9769	509.431	26.0717	1.79005	269.25	15.788	594.444	130.579	29.0539	34.0518	22.9086	10367.7	3.06332	4.0021	2.41117	3.86711	66.3545	55.1431	42.7506	42.3319	42.6582	22.7652	11.1696	349.712	519.826	92.3516	92.6504	47.182	34.5449	23.1977	28.6299	30.3415	82.3879	54.7003	88.9683	75.2626	24.3252	21.5076	7.25763	10.0287	0.425511	1.18708	1.5736	1.3448	0.0948034
LTU	48.8546	123.065	5.01668	1.44999	39.7473	912.077	262.082	66.4001	90.6307	75.8642	267.297	22.9746	7.02972	29.5521	39.329	155.921	7101.52	8.1423	245.534	1.1786	115.246	185.002	17.3289	9.39933	340.152	8.11601	11.2379	624.619	734.744	61.0659	58.1755	108.083	18.1127	9.98602	20.9323	16.5823	360.136	47.4743	53.4125	22.1567	19.8706	322.927	7.29934	5.34481	1.40873	1.84259	7.00437	1.57456	2.00268
LUX	2.06312	1.93027	0.152093	0.0693486	1.13582	29.4634	1.46337	0.0786419	10.5114	1.0073	72.812	1.89591	0.362906	1.19242	2.21409	12.4332	0.130505	30.9651	0.102725	0.0483259	27.5384	2.10355	1.89902	0.546192	2.92504	0.278133	0.370084	29.3225	21.697	2.55598	5.75781	2.14877	1.32193	0.908341	2.17775	1.46929	2.01644	1.94489	2.60558	3.13013	0.602422	1.34531	0.442054	0.722412	0.0395686	0.0701305	0.0770036	0.0661681	0.0450406
LVA	136.384	172.616	15.3115	4.15127	82.6165	1697.1	628.996	224.941	321.895	420.313	618.697	76.4093	25.1701	89.3762	360.345	455.836	253.999	11.7609	12798.4	2.89012	304.343	348.973	56.5737	24.2408	1806.11	23.6564	35.1313	4890.35	1176.12	511.099	197.443	103.111	87.2502	34.1956	64.1221	44.1694	316.144	70.9204	89.7463	77.9213	62.4171	507.67	24.0519	18.6089	8.06488	12.4364	10.6813	4.79433	7.23849
MLT	0.00450612	0.00454908	0.00194344	0.000759454	0.00431414	0.0272555	0.00325313	0.00144523	0.00810902	0.00367779	0.0159166	0.00785294	0.00218359	0.0042221	0.00446615	0.0182361	0.00116805	0.000808421	0.00101308	0.931004	0.0063189	0.00671655	0.00481517	0.00298237	0.00689564	0.00318177	0.00267237	0.0258832	0.029871	0.0579784	0.0127307	0.00640257	0.00834186	0.00544007	0.00799365	0.00708864	0.00568614	0.0063931	0.00398507	0.00494059	0.00879443	0.00645223	0.00331678	0.00182515	0.000113519	0.000118163	0.000288551	0.000364493	9.84E-05
NLD	8.16271	34.6771	0.679973	0.224334	4.85551	100.378	8.7558	0.296477	28.9366	4.54059	88.9292	11.9241	1.2522	5.63845	8.31866	41.3448	0.510858	1.92381	0.541316	0.190815	469.486	12.2468	7.37896	1.92361	15.7265	1.05172	2.01178	84.4666	70.4524	12.067	18.8328	5.81399	4.96636	2.93612	9.47488	4.23788	9.8253	8.17813	8.01255	8.41098	5.31237	9.43428	1.51151	1.6516	0.0759515	0.122996	0.226084	0.284519	0.0142828
POL	450.091	378.96	67.7452	6.0695	618.387	5303.35	426.492	54.7566	671.85	126.972	1612.11	137.754	108.564	531.24	102.733	1183.59	252.555	24.0195	107.565	3.86557	478.701	18488.1	86.3675	265.761	721.917	72.3651	242.776	1653.73	1131.91	226.494	388.163	167.161	83.388	52.4445	117.946	81.5439	1608.67	91.6836	202.064	273.07	120.499	325.031	25.1021	36.7196	2.35374	3.80015	38.616	4.16691	1.01299
PRT	134.909	219.15	15.0085	7.92805	51.4653	1287.5	77.0854	5.38459	3451.59	71.326	2186.43	187.169	23.3803	57.9269	80.0708	1087.75	6.68881	12.1346	6.0955	8.24736	277.724	97.8075	14756.4	29.6421	123.619	18.9112	15.7226	1217.16	1865.76	193.732	295.701	132.648	100.511	73.0556	65.2807	91.7433	112.735	326.647	140.377	236.124	69.1244	60.5735	15.256	40.8972	2.11785	1.60199	3.17481	2.81608	0.483741
ROU	272.716	104.471	54.4582	7.5511	56.6171	1169.15	48.1349	5.83326	456.872	23.2528	909.499	375.178	44.8724	431.21	32.0591	1617.17	4.1668	7.63703	3.89129	3.54752	162.953	93.7649	44.0287	5310.81	113.334	45.018	22.5962	421.154	561.105	285.886	349.86	54.0156	69.5646	16.1248	54.52	24.2407	116.183	37.0454	75.5209	602.065	48.7443	59.933	20.7944	13.7485	0.813912	2.72446	6.19968	2.37422	0.596338
SWE	1851.76	2396.53	109.136	116.297	878.404	15971	7927.07	194.683	6315.24	2952.33	9624.76	1590.48	265.381	997.497	2332.68	8684.47	219.371	183.495	338.053	30.444	5218.67	2781.29	1121.85	388.316	101336	203.483	301.531	21730.8	14672.6	5710.22	4807.35	1222.03	938.587	589.908	1416.85	745.557	2355.63	1405.26	1646.02	2045.1	1383.33	12822.9	513.024	478.496	9.63567	17.1633	43.2068	53.8255	3.44388
SVN	34.5633	5.88263	2.29001	0.344715	8.97332	118.276	5.8733	0.359981	14.9774	3.11074	34.2985	8.09707	49.831	12.536	2.51946	109.692	0.589468	0.617668	0.46967	0.187005	6.14773	8.80775	2.87699	4.36455	8.22577	514.344	8.56478	26.0273	35.4052	5.60206	9.58072	3.27556	2.40517	1.60447	4.78564	2.15813	10.6637	3.58856	7.80105	6.19493	3.50963	4.8517	1.07516	0.945236	0.267376	0.120402	0.250712	0.113056	0.0481479
SVK	178.11	29.4577	8.34386	2.64944	225.736	473.036	32.9454	1.51163	90.1355	13.1614	151.964	31.2515	18.9347	212.17	8.65209	304.527	5.32266	2.13638	3.66334	0.487357	38.9923	133.806	17.2681	39.0066	49.6358	36.685	1763.03	109.356	119.277	22.7983	26.4789	12.9231	10.111	6.57376	9.59474	7.91713	60.5669	13.4979	21.6527	22.7865	9.65924	22.5932	3.23039	3.87008	0.456866	1.59867	1.26488	0.504858	0.375477
GBR	45.421	166.753	5.85041	3.3608	34.6347	567.793	67.4383	2.97435	282.365	46.9956	698.73	59.4391	8.02799	29.735	884.255	322.919	4.60902	10.496	5.00243	13.8471	198.44	74.3245	52.9474	24.4561	120.355	6.39136	9.81093	14991.2	1221.34	151.814	187.701	90.4996	69.5186	32.431	103.59	47.874	121.867	103.071	77.3687	64.4609	53.3574	78.4159	18.9906	30.5824	0.912714	2.01256	3.94414	4.61834	0.286638
USA	631.298	1682.17	64.1594	25.5512	327.411	9131.72	477.022	32.7657	4037.33	377.512	5327.58	682.255	103.186	263.25	1147.27	6204.83	44.0682	84.4194	33.9244	26.5626	2678.85	696.994	631.694	194.817	932.708	100.075	95.9683	11796	1.51563e+06	14137.6	14097.7	38412.2	5582.74	2594.54	2646.34	28900.6	1178.22	3638.98	1224.81	1458.22	3886.26	570.173	872.91	423.188	25.8545	28.0419	61.4641	98.2016	3.44638
JPN	10.6977	24.8181	1.05191	0.379669	6.87597	132.687	7.6066	0.603605	49.0216	9.1157	77.047	11.0342	1.99725	7.34694	14.167	65.0044	0.521874	0.635672	0.479193	0.376552	38.7274	9.61374	6.42005	2.94261	16.0754	1.74923	2.08851	138.948	1125.09	31076.7	681.141	55.9793	196.421	22.5783	45.9278	44.3256	23.2497	81.7158	14.8216	16.5597	215.482	11.5091	34.3714	5.42589	0.840971	0.200384	0.815495	5.1269	0.190411
CHN	320.163	796.989	57.206	14.3584	236.077	4289.12	350.559	24.8726	1750.68	290.871	2761.62	426.622	95.9194	218.418	377.196	2667.44	29.1904	21.1554	21.4148	15.0039	1335.1	424.712	193.664	147.553	543.421	62.4845	65.2475	5251.93	38769.8	12842.5	268786	2623.5	3708.78	628.897	1484.82	1230.88	1274.59	2461.65	411.292	639.806	380.168	430.329	601.834	254.294	26.1874	6.43032	77.4889	267.938	1.52302
CAN	574.572	1231.87	59.1868	26.1581	257.946	5951.25	404.46	24.8928	2864.38	351.848	4908.98	732.015	101.368	224.674	1079.39	5375.83	41.2234	72.4887	30.8246	19.3329	1770.73	480.597	554.845	168.315	973.275	81.0149	82.3365	10646.4	480219	11583.6	11968.3	476352	4508.53	2853.19	4525.02	8076.06	878.106	3599.99	906.947	1391.27	3077.99	559.56	824.193	308.423	14.7746	22.2953	38.7045	119.082	3.00882
KOR	8.28299	10.9251	1.22852	0.609035	3.9434	71.6422	5.84673	0.409668	33.2962	7.4782	47.0976	13.2185	1.67271	4.48834	8.01827	47.2555	0.553641	0.525873	0.520176	0.706985	17.9288	7.55785	4.43214	2.87358	10.1783	1.2772	2.39917	77.8756	711.805	253.723	556.823	42.2904	7053.77	15.5455	60.7973	27.9396	29.7709	85.0844	7.80287	20.5614	183.786	7.86305	25.6627	6.47332	1.18686	0.195174	1.00141	9.62188	0.0578036
BRA	2427.73	10919.6	1815.33	92.0793	1586.41	35351.5	1942.36	159.629	18378.1	1987.8	27190.5	3457.7	1221.98	1476.15	2897.22	26260.1	313.171	365.863	206.974	145.617	23933.9	4093.48	5297.35	3751.41	5129	2100.81	519.885	30265.5	138631	33194.6	55771.8	9789.73	12282.8	2.8124e+06	16802.9	14582.9	38576.5	5198.23	3031.01	4073.02	16893.1	2451.28	3214.33	2211.05	234.969	455.864	856.446	10242.8	11.8013
IND	17.8715	40.1434	3.30496	1.44179	8.94999	147.977	17.4641	1.25292	82.2252	11.1561	105.196	23.5178	3.65962	8.96092	15.6395	116.414	2.20742	4.11602	1.56331	1.06482	51.403	18.2664	17.1918	5.53671	25.1613	4.32354	3.90629	230.896	704.658	170.237	165.227	59.3524	79.8325	25.5702	28845.1	40.35	53.2791	61.4227	25.3665	35.8811	47.758	20.298	52.0958	26.0906	8.4239	1.72166	3.44584	118.006	8.21988
MEX	11.3369	43.3814	2.20527	0.235202	8.73675	160.618	13.5688	0.498917	91.6186	5.50406	91.4651	12.2112	2.11052	5.32711	11.4924	63.2249	0.607571	0.826679	0.746418	0.291366	36.2414	10.13	12.1288	2.76654	13.617	1.87821	2.32477	147.189	15494.1	284.305	105.528	398.327	55.6377	52.1223	19.9648	135747	17.8216	61.1938	42.6558	11.2709	38.7849	10.252	6.47896	3.86162	3.89483	0.623129	0.520294	0.999059	0.077628
RUS	2176.41	2902.93	693.78	478.527	1540.97	16504.1	2126.36	3360.08	4242.95	14725.4	8973.97	2448.25	381.756	2493.74	7021.23	10132.1	1982.6	231.979	2680.96	72.7691	4165.3	3184.7	668.493	927.559	3976.03	293.919	717.309	16485.9	29599.6	30409.8	61191.5	2105.44	6672.88	809.564	8670.87	1014.47	379040	1668.81	1668.25	9703.7	12546	2105.72	902.644	416.06	171.947	643.42	3722.08	166.888	32.5121
AUS	49.0391	92.7378	6.68155	3.08472	17.6834	339.082	46.5908	2.47411	167.356	41.8152	253.819	48.1013	7.41227	19.2226	62.1564	240.46	2.93861	7.72315	4.97737	2.25362	135.548	37.7978	41.3177	11.4483	76.3421	7.6843	7.69213	942.909	2769.72	4207.54	1963.81	263.128	756.137	54.369	381.657	112.575	91.6132	62649.4	71.4609	64.9192	471.35	54.0437	272.701	86.1349	2.50461	3.01343	4.21474	51.4908	1.77591
CHE	50.7076	25.4562	2.88009	0.487225	11.9414	286.288	10.5396	0.499254	53.4174	6.15253	178.698	16.1889	3.94621	13.629	13.2146	147.847	0.934258	2.08911	0.668981	0.296117	30.2472	14.9075	8.87855	7.87309	14.3265	3.11651	3.93907	111.048	171.501	33.5938	31.4337	12.5869	12.4865	9.42378	15.4603	9.11226	17.2962	11.6652	1687.99	24.4596	7.97957	8.48078	3.0523	5.62381	0.216079	1.09163	0.765674	0.941931	0.0460908
TUR	33.2529	46.5425	57.1168	15.4625	14.4441	345.205	25.4196	1.86592	128.253	13.4356	182.075	103.357	8.78724	21.9092	28.811	242.551	4.31385	3.53462	2.6678	1.97023	68.5353	35.5743	22.9164	93.5338	38.6764	7.27559	7.23774	294.661	411.037	55.2184	83.259	42.9308	27.9069	12.807	32.0302	22.0922	134.759	32.0785	28.029	20402.8	18.9781	23.3626	9.59973	23.4504	2.08282	6.67494	51.2716	1.65693	0.307443
TWN	1.48297	4.19128	0.396796	0.152566	1.33387	19.5834	1.82542	0.235488	8.48086	1.55922	12.791	2.50136	0.539133	1.05478	2.01986	12.3008	0.235047	0.174607	0.175113	0.153438	6.36572	2.67255	1.19213	0.790005	2.49623	0.348079	0.401914	27.0607	198.524	89.9656	8.03529	14.2091	23.1076	2.47652	6.25613	6.62886	8.05625	14.9376	1.93139	3.38132	594.281	1.93229	5.4672	1.75799	0.034188	0.0433782	0.0703842	0.851228	0.0193541
NOR	97.1333	215.756	7.6402	4.92688	58.813	1253.49	505.048	13.6913	385.847	145.275	653.989	159.192	15.6659	52.3886	193.649	517.954	24.3402	17.8702	14.39	3.37738	356.47	206.759	75.8017	25.4073	1768.32	15.6109	19.762	2371.68	1847.41	374.048	388.944	121.121	122.878	166.053	110.156	84.3277	128.69	145.786	132.445	119.786	106.015	17421.4	40.5335	30.6727	1.1652	1.48738	4.86637	4.63965	0.602837
IDN	644.889	2352.62	165.731	32.0254	467.846	8333.12	640.253	53.1626	3955.15	456.725	4533.55	874.93	136.697	348.398	606.425	5097.63	49.736	108.282	37.5192	23.0102	3677.27	1055.49	574.063	284.162	862.396	251.336	243.793	8215.1	49084.1	33710.5	30000.2	3311.6	7839.51	1818.04	22359.9	1844.06	1612.66	6974.16	721.308	2201.63	9046.91	823.317	857195	659.17	123.868	29.3904	35.0641	2439.44	6.97632
ZAF	175.163	179.698	7.73875	3.79552	43.0564	943.347	52.5651	3.40731	580.373	44.763	499.91	58.8738	13.343	33.3237	120.28	536.631	4.06909	8.79528	4.1196	2.32185	238.117	57.4146	74.9636	19.0428	85.7231	12.1647	15.3772	1732.87	2458.16	2283.3	1089.48	186.86	209.428	160.101	630.705	110.634	88.9109	508.549	82.6633	128.935	276.583	64.6141	151.979	49278.7	3.38709	2.38922	4.52592	11.894	1.16335
AFG	0.326493	2.84821	0.0427622	0.0181425	0.169687	2.83488	1.10781	0.038121	0.824894	0.527242	1.29071	0.218291	0.0419746	0.162294	0.205964	1.54966	0.0449072	0.102451	0.0315364	0.0212337	0.924063	0.496572	0.13243	0.0914925	0.237667	0.0677505	0.067059	3.81148	6.07855	4.88801	3.59152	0.297359	2.75647	0.46034	36.0604	0.575675	1.34345	1.39664	0.197509	1.04958	0.76793	0.173475	1.11824	0.224802	78.6345	0.00809918	0.0167545	0.301005	0.00894539
ARM	0.302093	0.555306	0.0424349	0.0119557	0.0592913	0.748508	0.240845	0.0277355	0.42662	0.0615084	0.525065	0.0962643	0.0221823	0.140668	0.124217	0.434788	0.0730335	0.0989761	0.0590317	0.0116351	0.453872	0.121029	0.0588626	0.0460193	0.0947437	0.0444622	0.0518251	0.775981	2.21901	1.0072	0.525907	0.138755	1.90594	0.170568	0.268826	0.268799	5.18616	0.616463	0.125952	0.198623	0.351206	0.0564664	0.541392	0.154572	0.00785621	29.6036	0.0149644	0.00858289	0.00355027
AZE	1.47215	1.00554	0.116682	0.0487387	0.513305	8.64195	0.566501	0.104982	2.17704	0.227102	5.89081	0.603482	0.109984	0.404817	0.415123	16.4516	0.287979	0.584205	0.179751	0.0490579	3.18161	0.988948	0.475062	0.425383	0.411494	0.185226	0.355296	4.06693	30.5834	3.71316	2.84074	1.51399	3.77296	0.697665	1.02988	1.38855	33.4418	1.67729	0.527392	12.5198	1.21926	0.233071	1.34884	0.44307	0.087827	0.0436681	214.818	0.0331239	0.00843039
BGD	2.98423	6.66923	0.16349	0.0655583	0.599077	16.8313	3.03361	0.0837708	8.41077	2.96193	11.5711	1.15633	0.17803	0.63097	1.12341	18.2398	0.0848771	0.460128	4.57879	0.0451944	7.43845	1.19513	0.907146	0.286023	3.03183	0.209419	0.382111	81.999	61.6259	8.65163	45.0424	5.76827	5.3693	1.77432	36.6365	1.33421	3.10157	2.79772	2.97586	1.29087	1.39555	3.20462	2.08818	0.887756	0.327751	0.0222097	0.0409867	2079.72	0.109952
BTN	3.48772	2.66983	0.559096	0.15215	0.480595	5.02804	2.60693	0.262984	7.19851	0.995409	6.67854	0.877288	0.309207	1.26162	1.6059	5.62089	0.300716	0.67136	0.225351	0.137072	3.99272	1.37707	0.713126	0.565973	1.40427	0.463108	0.627626	10.0423	31.2451	20.2243	5.39823	3.3318	14.575	2.03276	214.37	3.20081	7.12673	6.03292	0.852699	2.06509	2.7715	0.738329	6.01964	1.07401	0.106787	0.0490313	0.0867082	0.91858	144.657
BRN	4.34573	2.9457	0.515547	0.160219	0.574315	8.02275	3.39174	0.245436	5.2866	0.648955	8.53401	1.07458	0.290774	1.60668	1.31195	5.53686	0.296695	0.488096	0.219459	0.164964	5.0427	2.50231	0.685241	1.16703	1.23464	0.586967	1.7679	18.0377	85.2121	140.99	45.4202	4.00932	72.9615	2.16023	5.43674	4.10962	10.5241	25.1987	2.20323	2.42018	8.80479	0.746204	6.64028	1.46155	0.062623	0.040402	0.0935619	0.326458	0.0245985
KHM	286.767	410.365	19.7162	5.31733	28.569	807.575	198.364	10.6823	259.818	42.6211	456.392	55.0135	11.8903	79.3246	119.966	404.282	13.0909	16.4289	11.07	5.11388	260.888	65.6079	34.896	16.6019	163.152	34.5781	17.6901	1051.76	6096.56	633.085	6043.09	196.098	826.553	48.7916	153.68	103.982	307.374	279.663	139.611	90.858	147.979	184.192	221.735	53.4688	2.1044	1.40979	2.68665	6.34018	0.921934
PRK	11.8833	12.9906	2.7994	0.479214	3.60651	51.7661	12.3767	1.28823	44.5343	3.10408	45.5601	5.59149	1.84695	5.09129	6.65042	32.1248	1.18219	2.79268	0.816125	0.524956	30.7229	8.43526	3.35888	4.67811	7.16407	3.73741	2.03101	68.7024	281.482	547.272	2703.11	17.5046	403.497	73.1325	26.6091	83.2298	34.6969	44.7668	7.42303	9.16226	18.6724	5.03389	33.3518	8.50671	0.315916	0.177936	0.711474	2.04885	0.136989
FJI	2.36101	4.67899	0.323752	0.181871	1.47122	12.6473	3.35734	0.365591	7.80092	0.959538	12.1131	1.68572	0.322769	1.31369	2.33963	6.85809	0.407636	1.55982	0.294363	0.214811	13.0729	1.93273	2.55593	0.863553	1.81242	0.573618	0.602432	55.2198	320.927	185.546	23.4139	6.51705	39.6933	4.09274	7.60426	7.46483	5.44164	198.354	1.62389	2.63351	11.9039	1.25083	18.8667	3.30355	0.091711	0.0732914	0.128145	0.515623	0.063304
PYF	0	0	0	0	0	0	0	0	0	0	0	0	0	0	0	0	0	0	0	0	0	0	0	0	0	0	0	0	0	0	0	0	0	0	0	0	0	0	0	0	0	0	0	0	0	0	0	0	0
GEO	2.85555	5.82996	1.01274	0.45029	2.3115	29.0495	7.24517	0.622702	14.9865	1.23328	21.7147	10.284	0.518363	1.60881	2.34403	19.9136	1.68199	2.06932	1.0948	0.288022	18.6298	3.37627	1.70809	1.64683	2.48676	0.535446	1.05638	44.32	56.5335	52.4558	15.8946	2.78205	88.7993	4.82252	9.54818	7.17049	27.5657	23.992	2.33164	124	11.6546	1.78634	23.1899	3.79316	0.350584	2.88499	1.3175	0.231476	0.0805579
HKG	0	0	0	0	0	0	0	0	0	0	0	0	0	0	0	0	0	0	0	0	0	0	0	0	0	0	0	0	0	0	0	0	0	0	0	0	0	0	0	0	0	0	0	0	0	0	0	0	0
KAZ	14.3358	7.77923	0.930318	0.401969	10.9698	59.2382	2.41796	0.886476	21.5707	4.21911	41.3635	5.46038	3.73616	3.41213	2.0266	50.6047	1.45552	2.02827	0.688776	0.352403	17.0167	9.58806	4.0834	6.92449	4.26258	0.964748	4.75142	31.7322	58.3772	25.6633	95.2029	4.45799	15.478	4.98123	7.74904	5.13496	113.893	17.6131	4.68149	34.805	13.447	2.69351	11.8891	2.65422	0.971246	0.183761	1.73634	0.294711	0.0500886
KGZ	0.226617	0.453915	0.250212	0.0241403	0.224084	1.6974	0.288964	0.0443611	1.03014	0.109735	1.17332	0.162777	0.0465602	0.149754	0.182232	0.782527	0.0564647	0.164786	0.142397	0.0247307	1.50646	0.261097	0.139662	0.122567	0.187891	0.0431892	0.0840811	3.33772	3.67869	4.85076	2.18601	0.217674	6.31209	0.426464	0.953038	0.689058	3.36451	2.42089	0.164051	2.93188	1.1508	0.11741	2.04274	0.342808	0.146943	0.00961563	0.0376333	0.0215528	0.00480774
LAO	177.57	177.92	18.868	5.58733	32.4991	391.727	134.591	9.619	253.221	53.4364	547.081	32.6389	9.92336	67.7291	337.293	259.78	11.5051	17.466	48.1135	4.55328	148.032	523.388	87.6425	57.4088	50.4642	26.4841	73.6434	399.915	1348.77	457.389	1171.82	80.6755	281.239	45.302	105.937	74.1732	291.958	173.946	236.324	66.5804	158.464	88.7343	125.195	37.1801	1.5489	1.28356	2.40217	3.54522	0.907413
MAC	0	0	0	0	0	0	0	0	0	0	0	0	0	0	0	0	0	0	0	0	0	0	0	0	0	0	0	0	0	0	0	0	0	0	0	0	0	0	0	0	0	0	0	0	0	0	0	0	0
MYS	818.103	2267.97	121.971	77.2503	496.969	8142.24	912.911	183.814	3676.64	734.078	6368.93	884.185	168.093	419.212	965.618	4954.59	115.249	231.128	61.6274	61.8178	6714.74	792.718	678.877	363.57	1098.88	132.042	168.264	14638	34230.2	28815.4	27389.7	3563.79	11387.2	1360.1	7958.49	1876.48	2135.61	6138.1	1164.47	2016.28	4199.67	771.855	13371.9	2257.93	25.9679	18.3871	35.2188	254.734	3.25095
MDV	0.0306029	0.0134697	0.00236045	0.000799866	0.00146162	0.0394675	0.0227173	0.0015214	0.0306744	0.00427105	0.0325944	0.00542571	0.00145549	0.010524	0.00814654	0.0317756	0.00231277	0.00272417	0.00183299	0.000461637	0.0111561	0.00504789	0.00335327	0.00200373	0.00664637	0.00402111	0.00141191	0.0718416	0.143135	0.111392	0.0174207	0.0197769	0.0305414	0.00553812	0.0333029	0.0127002	0.0457889	0.0138828	0.00347504	0.00871507	0.00671862	0.00239081	0.0131827	0.00424516	0.0002873	0.000210412	0.000328629	0.000412981	0.000202201
MNG	1.19462	2.54959	0.28089	0.109873	0.813888	9.88441	1.68317	0.204362	4.9635	0.648332	6.72899	0.932622	0.260072	0.896005	1.13284	19.865	0.200518	0.604023	0.136675	0.110929	5.77109	2.00158	0.648746	1.21297	1.22877	0.237495	1.19303	29.2573	80.2154	55.6224	436.231	3.10655	42.5066	2.35863	5.75021	3.94441	10.7746	9.44477	2.15808	1.99027	5.08213	0.951837	8.88594	1.55977	0.0614065	0.0374597	0.12771	0.364264	0.0268984
MMR	37.4483	64.9042	4.02552	2.49466	10.2639	173.182	29.3263	2.35126	73.5007	12.6389	122.863	18.5051	6.36592	34.6722	15.4967	125.743	1.77276	4.21286	1.64777	1.79064	73.5826	60.5413	13.4883	59.0444	24.3382	5.57378	51.895	667.202	714.918	1575.03	2036.44	104.076	384.301	24.8964	7240	37.8288	51.1588	326.227	33.7405	37.6406	149.668	15.8134	376.867	21.1112	2.30289	0.519976	1.13934	131.137	1.93654
NPL	2.58945	3.04262	0.236941	0.0898264	0.702306	11.3842	3.69723	0.121283	5.38349	0.634652	14.0719	1.50839	0.394402	0.96431	1.23781	8.54508	0.1748	0.670192	0.132265	0.0973651	3.65585	6.48259	0.949995	0.480084	1.36351	0.44243	0.334822	16.6817	43.7831	18.0549	22.3474	3.1579	5.82152	2.14836	608.783	2.80391	4.06023	4.61006	3.5783	2.65938	2.76498	0.94474	2.69476	1.10801	0.169715	0.0388924	0.081359	2.45061	0.136222
NCL	1.48243	2.05519	0.169631	0.098659	0.348151	5.77243	1.12596	0.115028	7.98464	1.27263	16.0026	0.535316	0.184011	0.702571	1.45939	6.23968	0.123657	0.333492	0.0968596	0.0707222	2.17031	1.01702	0.586623	0.674653	0.782577	0.23862	0.820685	5.85737	21.7498	52.5619	10.4527	1.80662	14.7064	1.05353	6.4377	1.56516	2.64159	24.658	1.776	1.11316	4.37608	0.443342	2.45274	0.975041	0.0275312	0.0204397	0.0409501	0.124018	0.0136643
NZL	71.9086	453.899	6.97866	8.78692	31.4242	701.287	92.4152	5.41886	366.568	47.8872	472.359	54.2154	10.7571	31.9908	83.0229	483.563	6.24581	28.5501	5.41321	4.20253	483.599	53.0633	46.8095	18.9404	69.2755	9.79132	16.6478	1910.53	5772.92	4574.04	3885.68	315.28	3186.22	95.6933	379.831	263.03	144.896	8252.77	117.596	76.1354	697.492	59.5533	954.498	171.006	2.34647	1.75301	4.06923	17.2128	0.802719
PAK	0.747994	1.96005	0.0653235	0.0958172	0.441354	8.24848	0.970201	0.0458592	3.94696	0.316673	4.84651	1.30803	0.129006	0.312016	0.656953	5.97458	0.0565845	0.459554	0.0458469	0.0379457	4.46591	0.666213	0.918313	0.202946	0.9765	0.087962	0.189153	30.1614	31.8408	6.39986	8.8926	2.55539	18.5253	0.539531	10.8679	1.17018	0.883365	4.25865	1.49247	2.10863	1.11324	1.26865	1.89635	1.73412	0.52404	0.0345427	0.0609871	0.152401	0.00674894
PNG	47.7878	213.068	5.89745	1.1332	13.6407	1416.2	31.0362	1.55575	110.101	22.7853	311.299	26.4043	4.16531	14.5225	53.7098	196.798	2.38456	3.90828	1.73237	2.05348	157.218	36.2895	30.2496	8.39973	41.5432	4.8199	5.61723	3039.53	2079.76	3568.37	693.977	80.2262	1598.09	26.1139	78.502	40.7364	59.5837	815.068	23.2474	29.0653	70.8616	19.5991	254.357	29.8761	0.741406	0.585011	1.57471	6.87893	0.164177
PHL	32.6245	98.3589	2.43017	3.56288	14.3747	408.821	32.6104	1.36278	132.201	21.8625	202.446	29.8879	4.99283	10.6671	26.0252	186.459	2.14395	3.07241	1.4589	2.69245	185.262	31.8063	13.9884	5.10383	34.751	5.52939	8.35399	484.139	3290.87	3205.85	1029.79	290.47	926.514	85.5062	89.4345	83.9908	72.1614	111.185	88.0635	35.1994	102.875	35.1142	280.412	42.1515	0.675214	0.652353	0.970307	5.78838	0.168649
WSM	0	0	0	0	0	0	0	0	0	0	0	0	0	0	0	0	0	0	0	0	0	0	0	0	0	0	0	0	0	0	0	0	0	0	0	0	0	0	0	0	0	0	0	0	0	0	0	0	0
SGP	0.106003	0.196227	0.00846605	0.00751999	0.0597628	1.09133	0.140097	0.00377044	0.407776	0.0861963	0.749513	0.0664711	0.0153155	0.0525576	0.260953	0.472847	0.00591631	0.0431148	0.0125762	0.00846223	0.471294	0.0795918	0.0460198	0.0145167	0.112868	0.014204	0.0220083	1.21549	2.80021	1.64084	1.43741	0.315593	0.811209	0.156987	0.700637	0.165145	0.119017	1.05646	0.212263	0.0801957	0.210996	0.123053	1.16282	0.24866	0.00359975	0.00132989	0.00404972	0.0507039	0.00102225
LKA	12.2088	51.1897	2.54458	1.6261	15.2788	144.084	14.1464	5.31657	48.56	47.118	121.185	18.4712	2.18674	7.50278	17.9258	107.539	7.42165	2.85433	92.0539	0.534172	80.8125	41.6233	8.68699	3.8881	19.2909	2.27812	4.82217	244.833	442.781	427.302	104.046	77.2422	91.6336	10.4769	507.722	74.3158	366.45	42.9622	25.1658	214.468	12.578	9.13331	15.0502	14.3784	1.15092	0.792312	2.95859	2.20224	0.075065
TJK	0.0366306	0.0224677	0.0445032	0.00104087	0.0186188	0.0560173	0.0229164	0.00308637	0.0417156	0.00577583	0.0723269	0.0123427	0.00560287	0.0153773	0.0117087	0.0566854	0.00355008	0.00419121	0.00241164	0.000949335	0.0267998	0.0200422	0.00759774	0.00663688	0.00891258	0.00788244	0.02337	0.0680441	0.139176	0.0939753	0.0599638	0.0113568	0.20553	0.0183422	0.0236459	0.019194	0.815843	0.0442562	0.00856666	0.0376882	0.0242989	0.0317017	0.0404733	0.00885155	0.000487727	0.000462243	0.00145336	0.000646603	0.000193926
THA	201.477	559.212	21.7563	32.7199	149.198	1907.16	215.083	15.1709	869.573	164.046	1129.27	137.473	33.5762	91.3819	112.625	1008.45	16.0887	53.7909	14.896	16.0461	1152.16	197.389	175.325	63.0023	338.857	25.0444	54.0535	2620.02	9325.3	8317.41	5519.37	1025.38	1603.3	280.199	1017.29	348.883	321.275	1010.82	525.467	300.017	497.124	278.102	1489.93	401.276	3.70739	2.53142	5.67433	54.8677	0.842361
TKM	0.0138411	0.00897599	0.00292926	0.000596601	0.00464484	0.0534202	0.0089948	0.000960469	0.0162952	0.00232554	0.042701	0.00628377	0.00122577	0.00530348	0.00326931	0.0579357	0.001224	0.00108444	0.00192876	0.000347393	0.010196	0.0154774	0.00197852	0.00351036	0.00340863	0.00174594	0.00322662	0.0314685	0.159714	0.0506971	0.137404	0.0164275	0.0694091	0.00508397	0.0245746	0.00841246	0.105006	0.0130591	0.00594034	0.072321	0.0115404	0.00172474	0.0114381	0.00313917	0.0104142	0.000647387	0.0028921	0.000338007	5.82E-05
USR	0	0	0	0	0	0	0	0	0	0	0	0	0	0	0	0	0	0	0	0	0	0	0	0	0	0	0	0	0	0	0	0	0	0	0	0	0	0	0	0	0	0	0	0	0	0	0	0	0
UZB	0.0667699	0.0741934	0.0347755	0.00321223	0.0401067	0.182904	0.0171196	0.0319466	0.103719	0.0139621	0.341408	0.0383714	0.0102514	0.0179803	0.0171415	0.441448	0.0330996	0.0100374	0.013121	0.00211042	0.0599712	0.216137	0.0668571	0.0246209	0.020816	0.0130349	0.0234809	0.131796	0.268017	0.153854	0.100814	0.052171	0.407187	0.0419343	0.0858917	0.0312832	2.50374	0.0768829	0.0268113	0.19488	0.0438402	0.0102242	0.0481262	0.0133896	0.00350292	0.0035118	0.0232434	0.00151772	0.000435613
VUT	0.986712	6.57106	0.0916767	0.034159	0.191602	7.20581	0.893396	0.0748056	1.5031	0.177536	3.12988	0.199984	0.0573236	0.383558	0.328421	1.22734	0.0862146	0.171037	0.0597282	0.0323981	1.93988	0.327902	0.169473	0.133931	0.380349	0.142023	0.0831395	3.48705	7.18866	18.1945	1.42316	0.67436	19.0435	0.431925	1.63731	1.24137	1.43555	4.96112	0.36371	0.456323	1.18602	0.177771	2.25755	0.447811	0.012168	0.00933024	0.0163614	0.20331	0.00821957
VNM	211.622	525.511	24.953	6.55797	298.682	1774.31	183.428	19.1111	985.874	87.2798	1010.19	102.255	32.2388	143.482	81.3857	1242.4	19.0617	14.6065	71.573	4.34731	652.629	417.08	105.41	91.2205	187.789	39.6532	141.571	1933.96	4674.87	3596.01	4307	512.96	1854.94	275.015	737.685	209.813	928.403	862.877	284.173	147.034	754.083	184.271	330.092	102.391	1.88112	2.46686	4.8298	14.3881	0.693658
ATG	0.172625	0.170816	0.00928771	0.00366001	0.0159454	1.39997	0.117656	0.00849744	0.371313	0.0363602	0.782726	0.0858436	0.0128699	0.0672032	0.0658299	0.488296	0.0143832	0.0155886	0.00987241	0.00302132	0.106523	0.123428	0.0181726	0.0382525	0.05302	0.0285872	0.0201823	0.372989	2.87644	0.152897	0.298413	0.173225	0.456811	0.146554	0.0678028	0.309412	0.491589	0.078211	0.0350254	0.0801633	0.0722076	0.0387782	0.0484003	0.0730483	0.00574158	0.00441579	0.00662336	0.00559936	0.00619157
ARG	459.235	1914.43	408.612	101.303	282.764	8705.44	817.708	42.1846	5775.34	207.893	3773.83	1659.17	299.684	230.642	347.95	8811.33	140.489	141.476	51.2241	46.84	5323.23	914.748	1373.86	281.461	556.688	127.079	131.26	4750.16	17274.7	3611.66	18757.3	1566.36	2078.7	24525.4	8044.9	3056.25	6259.4	1231.93	570.831	2101.46	406.652	412.538	1705.85	3437.94	16.679	31.3059	38.3053	1982.46	5.67689
ABW	0	0	0	0	0	0	0	0	0	0	0	0	0	0	0	0	0	0	0	0	0	0	0	0	0	0	0	0	0	0	0	0	0	0	0	0	0	0	0	0	0	0	0	0	0	0	0	0	0
BHS	0.888527	0.764396	0.0623564	0.0311001	0.215698	8.08391	0.57755	0.0586661	4.59612	0.129047	5.49476	0.198246	0.16287	0.262845	0.298118	2.87644	0.0489195	0.0583533	0.0537987	0.0226469	0.386361	0.526961	0.193467	0.129748	0.232697	0.117913	0.083047	12.6816	30.5453	1.65213	1.23932	1.53479	1.1728	0.349381	0.253614	1.8962	1.60851	1.89988	7.07761	0.405278	0.199566	0.327536	0.123597	0.276723	0.0167379	0.271718	0.0199813	0.0187031	0.0152521
BRB	0.012894	0.0137455	0.000798551	0.000373959	0.00308385	0.0862186	0.0228363	0.000614683	0.0791472	0.00303828	0.133953	0.0041281	0.00158552	0.00447787	0.0158522	0.040687	0.000908651	0.00144469	0.00107008	0.000340385	0.0383331	0.0102805	0.00381419	0.00131853	0.00739818	0.0706316	0.001483	0.669062	0.689576	0.0205129	0.0265729	0.0930329	0.0203749	0.025268	0.00789897	0.0229424	0.0267862	0.0128523	0.00954226	0.008682	0.00988609	0.00488977	0.0031646	0.00414677	0.000418025	0.00041563	0.000629776	0.000607675	0.000423393
BLZ	5.25938	20.581	0.353711	0.284138	0.764872	34.0349	15.3594	0.291941	23.734	1.40255	27.611	2.24177	0.489628	1.80142	154.231	23.9527	0.35983	0.661501	0.352859	14.7102	28.3484	4.65229	28.3047	0.758534	10.8251	0.730134	0.519186	492.527	649.453	224.323	13.647	69.552	12.3012	7.73014	3.12284	34.4061	9.31532	5.24049	2.87226	3.04585	5.3725	2.40659	1.89912	7.91412	0.199072	0.28586	0.227609	32.9096	0.160103
BMU	0	0	0	0	0	0	0	0	0	0	0	0	0	0	0	0	0	0	0	0	0	0	0	0	0	0	0	0	0	0	0	0	0	0	0	0	0	0	0	0	0	0	0	0	0	0	0	0	0
BOL	389.514	337.343	15.2513	3.71446	30.0826	2289.86	207.67	9.37648	920.945	46.7479	1725.54	64.2027	13.7302	82.3572	78.1456	1435.24	13.7919	1430.88	10.5962	4.95235	466.398	188.395	39.2371	20.6815	99.1908	43.1543	13.0709	1782.92	10011.6	1251.58	1071.83	490.568	531.039	1291.06	337.744	648.898	925.577	250.81	160.016	111.964	70.4157	46.2118	38.8015	46.4591	5.79019	4.48184	6.69938	28.3858	4.70359
VGB	0.026358	0.0260202	0.00144036	0.000363687	0.00284681	0.148079	0.0139099	0.00104538	0.0578011	0.00322177	0.117373	0.00322621	0.0018639	0.0084111	0.00747938	0.107856	0.00164698	0.00130852	0.00112991	0.000332304	0.00770022	0.0141908	0.00202053	0.00240238	0.00608756	0.00313158	0.000975012	0.0756832	0.392915	0.0128521	0.0337114	0.00886755	0.036091	0.00848406	0.00672102	0.030128	0.0555536	0.0143062	0.28347	0.0119359	0.00705302	0.00188856	0.00427576	0.0346724	0.000515131	0.058217	0.00677258	0.000530676	0.00047259
CYM	0.249843	0.262313	0.011389	0.00431302	0.0168245	1.43211	0.146042	0.0105516	1.09255	0.0305012	1.11115	0.0463417	0.00925403	0.0923364	0.0808552	0.929822	0.0178726	0.0145883	0.0116154	0.00356833	0.078735	0.14803	0.0225591	0.015228	0.0630875	0.0324754	0.0103739	0.214062	4.13148	0.148159	0.361953	0.156122	0.377415	0.0845567	0.0736891	0.356584	0.698939	0.0810984	0.0952727	0.0887458	0.298586	2.63985	0.0415384	0.0797146	0.00563609	0.00439657	0.00683646	0.00603825	0.00653281
CHL	65.8421	207.706	13.5591	2.6737	28.0387	771.462	201.12	4.84377	1405.52	59.2712	766.465	71.9566	13.4951	24.6786	124.781	1014.37	5.98837	17.5063	6.10782	2.48128	626.231	57.7222	125.628	16.2385	124.186	14.8156	9.52463	1017.1	19226.3	2962.65	2082.92	1151.4	752.997	810.958	262.356	3387.31	158.339	373.195	129.671	154.501	320.897	148.587	222.152	87.434	1.91303	2.84886	3.65125	15.044	1.78923
COL	157.305	2659.07	20.1201	3.73011	111.955	3142.12	542.407	6.2316	4785.01	260.3	1225.56	135.201	76.0076	42.1398	265.611	2325.77	22.5895	8.65327	6.01366	4.13427	675.213	220.843	414.597	83.8957	388.122	78.5402	85.6593	2662.96	23533.9	2633.88	459.019	1288.85	323.931	647.893	73.7958	1633.3	1076.23	255.61	261.479	75.2089	135.261	333.324	50.5412	194.495	11.208	3.68462	8.33283	30.3726	0.936575
CRI	68.506	141.421	2.94977	0.194523	34.0312	420.753	17.3543	2.19367	78.516	89.3801	91.964	24.0616	2.48894	5.54212	43.0712	292.996	1.81417	10.1592	0.750259	0.266033	88.9171	39.6229	45.6326	6.06101	93.2366	4.90636	17.2582	384.477	2393.85	75.7235	40.5521	95.5778	14.7576	4.99474	8.9728	208.271	20.325	15.2481	46.1969	9.29922	5.74636	77.4939	2.53478	8.34766	0.176481	0.607587	0.307267	0.337557	0.0691158
CUB	12.547	31.3961	17.3343	28.3634	5.47043	160.286	10.3303	9.47918	607.633	38.8374	201.214	7.95049	3.08749	3.6358	5.03164	66.4656	0.814769	0.831503	2.4389	0.730877	98.5	11.9187	83.5378	20.8542	8.07067	2.2198	2.52691	80.1431	181.697	69.6677	445.975	83.1746	20.1872	17.8005	11.5385	47.7521	435.574	37.314	121.205	6.62361	4.9083	36.1843	2.4307	3.62828	0.242689	17.8457	2.33903	0.533622	0.154781
ECU	142.569	406.877	25.6452	0.969244	31.0618	1341.03	32.547	5.91597	530.503	23.258	460.718	166.517	40.7307	12.2686	12.3148	1491.53	14.7496	8.38379	6.86661	2.37579	406.053	143.208	117.507	128.034	24.3965	36.9287	18.9108	502.589	3421.82	455.547	143.779	216.207	102.15	75.0298	47.5727	179.734	734.632	50.348	64.1343	67.7682	27.1058	17.09	33.7673	14.5707	1.04735	0.693139	5.40709	2.11902	0.316162
SLV	5.32763	15.6438	10.9999	0.0951505	9.42272	105.03	3.33628	0.15071	114.647	4.15822	40.2143	2.08052	0.5648	1.30294	2.12513	52.4821	1.17131	0.271329	0.230595	0.0804945	10.4774	4.39657	6.36049	0.974688	4.92789	0.811351	0.533726	44.2645	741.976	31.1906	9.02562	51.1704	8.25587	1.80956	2.42809	51.2055	30.9491	3.33626	3.76793	2.30904	2.95761	1.55381	0.761449	1.02538	0.131993	0.142954	0.29647	0.147459	0.0739178
GRL	0	0	0	0	0	0	0	0	0	0	0	0	0	0	0	0	0	0	0	0	0	0	0	0	0	0	0	0	0	0	0	0	0	0	0	0	0	0	0	0	0	0	0	0	0	0	0	0	0
GTM	52.6535	150.03	6.01268	1.73237	18.3307	768.195	31.0127	2.35339	638.186	58.9989	298.858	17.967	7.29449	11.1037	27.8901	391.918	3.10373	3.28261	1.84517	1.20253	230.402	33.99	38.279	8.76641	95.2258	7.25418	5.79549	318.256	10540.7	508.99	417.207	927.313	345.582	50.8043	95.1914	1387.28	208.197	87.1689	297.617	25.9868	40.3616	78.5399	44.292	54.6275	6.04727	17.2093	2.29632	14.9914	0.613888
GUY	0.345718	0.823959	0.0323018	0.158879	0.0909657	3.87047	0.396139	0.0199239	1.45556	0.114664	4.74117	0.296154	0.068896	0.15496	0.467906	1.64689	0.0381127	0.220172	0.0187245	0.0586493	1.93979	0.882988	4.28005	0.14774	0.272275	0.103859	0.0387929	15.2701	85.6063	1.69947	1.71683	13.3147	1.22963	0.926597	0.431072	1.72706	0.779175	0.504061	0.330013	0.486924	1.19302	0.233572	0.211123	0.128998	0.0199771	0.0160425	0.0260874	0.0308344	0.0149469
HTI	2.93762	4.74087	0.161724	0.0484118	0.250973	22.1709	2.00753	0.159379	7.51433	0.454653	20.1895	0.682702	0.259359	0.998582	1.07598	25.1705	0.193872	0.206994	0.119225	0.0509308	3.13046	2.11263	0.394245	0.229668	0.96777	0.402399	0.155261	5.34475	257.501	5.23176	8.68172	10.0407	5.67852	1.33738	3.78869	6.54027	8.05736	1.36973	2.3357	1.48609	1.71422	0.494695	0.567792	0.518805	0.0915107	0.0691671	0.105494	0.101521	0.0897861
HND	35.6278	245.085	1.89983	0.801912	21.0435	966.195	28.2536	1.03803	312.996	41.0691	252.383	18.1542	4.60872	8.89907	32.5205	195.288	1.36197	107.786	1.10634	0.450661	225.116	34.6442	37.6927	12.0848	59.8592	7.89536	9.12519	305.937	5502.81	530.635	101.239	348.828	86.5039	28.4522	8.70487	362.923	61.162	32.5025	73.7092	20.3427	20.435	24.6511	9.01718	6.10599	0.613802	2.21045	1.15526	0.777856	0.303305
JAM	4.14503	6.26819	0.401159	0.923379	2.17178	44.4133	3.47123	0.449235	12.5485	12.8844	28.1826	1.30211	0.496421	2.53377	4.5723	15.0169	0.619082	6.84401	0.443555	0.105971	21.2319	97.2669	2.55628	0.812055	17.5722	0.71679	0.771593	246.868	418.002	77.3934	15.6529	56.2544	6.23729	6.10364	4.52022	13.4947	9.68375	3.94517	6.85202	2.50333	2.14085	32.4682	0.870521	7.12081	0.0834132	0.108888	0.344269	0.176753	0.0603099
ANT	0	0	0	0	0	0	0	0	0	0	0	0	0	0	0	0	0	0	0	0	0	0	0	0	0	0	0	0	0	0	0	0	0	0	0	0	0	0	0	0	0	0	0	0	0	0	0	0	0
NIC	33.7016	96.483	2.27338	0.476864	9.28702	286.869	14.5084	0.718288	196.15	50.4913	151.921	7.69316	2.96352	5.63473	63.8287	118.844	1.13854	2.51763	0.770788	0.367974	64.3563	45.7714	14.9477	8.69622	41.0526	2.93535	4.18221	387.128	4731.05	121.611	79.1866	335.719	33.9257	9.44985	7.8805	900.139	108.669	31.4587	58.5975	9.45038	13.6315	9.29599	4.38303	6.30425	0.631547	0.547307	0.71372	1.31187	0.363178
PAN	64.1731	235.5	3.98316	0.344056	103.734	781.629	12.3758	19.4035	304.49	39.6184	85.8722	85.7206	5.54485	5.81868	14.8947	388.493	3.57135	0.94897	0.856668	0.302151	68.1756	64.9569	137.156	3.23604	245.166	2.18725	41.9489	165.605	1678.19	835.542	32.2512	39.9177	62.6965	17.7053	9.5692	183.826	36.8293	11.2192	63.2093	16.9919	8.22805	63.9009	11.5331	3.91804	0.399046	164.613	1.49607	0.404119	0.200663
PRY	278.114	485.752	26.4907	9.65825	51.4294	2851.93	231.065	12.8124	1305.44	85.5718	2701.8	911.423	105.669	135.878	164.37	3306.46	20.4585	34.7567	16.1959	7.22386	1809.06	224.621	425.02	69.3335	141.716	52.7673	29.391	696.157	10916.6	1114.35	1279.05	389.604	577.825	18432.9	362.31	1197.66	6256.48	215.346	1601.79	853.653	316.285	99.4783	166.333	169.801	13.3086	214.013	16.5813	71.1049	7.22532
PER	38.906	229.357	8.37954	1.97872	37.8431	831.634	223.074	2.35788	853.944	22.1614	679.117	31.5186	15.9429	26.9879	28.6811	425.275	2.46585	12.257	1.77037	1.32237	397.827	49.0881	40.6739	42.8389	70.7124	6.01113	17.4195	745.755	4636.39	695.14	874.441	447.808	323.25	213.31	60.0154	260.099	60.0955	251.531	63.0675	173.171	72.3546	246.722	73.3062	30.0471	2.78476	1.22476	1.86502	5.94409	0.423647
SUR	13.6923	25.1471	1.09817	0.691793	7.84263	135.586	18.6481	0.88229	54.8815	8.46485	275.075	10.751	1.96657	5.84704	7.86627	88.1988	1.68644	2.01359	1.20545	0.30715	94.2299	19.8939	18.8027	3.36109	34.9332	2.65084	4.2959	82.7546	377.83	28.3775	73.8988	36.7478	17.1863	21.3342	11.9747	23.318	18.461	11.825	11.7359	15.4695	13.2383	173.123	3.9013	3.27891	0.396494	0.344022	2.77768	0.691329	0.331512
TTO	0.9153	1.11782	0.0552561	0.0255869	0.112166	6.89356	0.54166	0.0333507	3.41923	0.15931	11.6182	0.552577	0.053429	0.267934	1.25419	4.18156	0.052791	0.083379	0.0365971	0.0161337	3.04671	0.590208	0.364865	0.086645	0.431222	0.163019	0.0523605	12.4485	156.505	2.67475	2.34665	9.06778	1.63938	3.00688	0.636194	6.07184	1.50969	1.23857	2.10151	0.4938	0.543683	0.410994	0.337739	0.776174	0.0274147	0.0259467	0.0407548	0.039063	0.0203545
URY	18.7731	31.2255	2.26571	1.34881	11.2603	207.502	29.6804	2.01016	258.972	22.7587	123.13	19.6257	5.41733	9.0667	19.803	137.391	5.10231	8.14146	1.67273	1.04078	114.617	24.0162	22.6758	4.52973	58.9507	5.51351	4.44587	180.805	740.841	149.727	233.091	82.2022	65.0574	556.455	75.2341	169.109	51.2079	40.4708	54.5508	55.3004	33.2038	368.944	43.1125	24.6419	2.25946	3.22395	2.34305	3.62102	1.82964
VEN	30.0513	121.641	2.82139	0.71746	6.13813	383.033	27.2951	1.40724	503.132	10.04	331.484	25.0557	9.88668	10.3384	26.2391	313.312	2.11243	2.53759	1.89769	0.664277	223.563	22.9541	58.3903	11.5744	174.367	5.06743	3.46712	458.809	5779.47	324.689	356.1	450.484	103.886	617.619	43.9846	547.92	59.2447	33.682	42.4272	23.4541	45.2598	21.9025	14.1819	11.2821	0.994573	0.894185	2.91306	1.79931	0.7591
ALB	6.08179	3.29665	1.7723	0.360491	2.36025	46.6896	2.97052	0.429453	7.07374	1.25322	22.1274	56.2988	1.17095	2.32106	1.07519	141.883	2.77179	0.430861	2.54167	0.315062	4.15967	2.72532	1.07924	1.70378	1.61063	1.1992	1.17002	9.80288	34.8573	8.84804	3.78026	1.95675	1.29357	1.81812	1.78993	2.72479	32.5752	1.71797	2.51482	6.24374	1.30863	0.904356	0.777144	0.577953	0.419678	0.414008	0.550917	0.230463	0.527631
AND	0.040229	0.031034	0.0540012	0.00399029	0.0420274	0.337458	0.0361766	0.0126883	1.40445	0.0257354	0.371017	0.0438414	0.0173004	0.0853787	0.0236569	0.135663	0.115133	0.0090985	0.0784725	0.00487899	0.0408439	0.0694192	0.034903	0.203592	0.0470156	0.0443483	0.0906275	0.140798	0.280566	0.0599186	0.0982001	0.0236902	0.0500806	0.0332961	0.0558857	0.033769	0.674	0.0279852	0.0198174	0.186637	0.0287507	0.024767	0.015412	0.0103733	0.00688982	0.0078395	0.0179115	0.00469779	0.011843
BLR	231.141	960.645	44.6874	15.7422	267.972	3641.13	396.855	196.086	577.694	331.579	788.426	110.557	54.3798	1606.71	101.668	940.809	1259.4	68.7137	796.122	6.40701	994.87	1277.71	67.6525	122.991	277.895	41.7494	80.3004	1119.08	1547.12	309.284	766.001	128.392	118.374	71.85	173.367	101.669	11194.6	86.5162	148.966	255.211	119.096	122.937	39.1197	31.8706	9.03752	17.641	58.6541	9.87086	5.42779
BIH	72.6972	34.11	1.56088	0.729776	7.33001	281.728	5.48748	0.664226	18.9363	2.67559	78.4185	6.73723	222.634	30.314	3.0618	235.868	3.25631	2.14904	2.51162	0.343199	23.4219	20.8237	5.39661	6.79041	9.54128	59.2887	5.61187	41.5852	73.4084	11.4295	11.1746	4.65129	2.98381	2.38453	3.64127	2.86589	38.4571	5.20413	16.1235	13.2801	3.26763	3.88337	1.52722	1.48329	0.353171	0.429525	0.795876	0.317379	0.598246
ISL	0	0	0	0	0	0	0	0	0	0	0	0	0	0	0	0	0	0	0	0	0	0	0	0	0	0	0	0	0	0	0	0	0	0	0	0	0	0	0	0	0	0	0	0	0	0	0	0	0
LIE	0.00880318	0.00535863	0.00425484	0.00130451	0.00353264	0.0245171	0.00664582	0.00348105	0.0164386	0.00463882	0.0143743	0.00713776	0.00308385	0.0149562	0.00552796	0.0171018	0.0147794	0.00238307	0.0128498	0.00176501	0.00998252	0.01539	0.00322144	0.0113583	0.00873403	0.00636227	0.00777594	0.0201276	0.0564923	0.0200171	0.0182241	0.00634661	0.00616752	0.00958388	0.0125767	0.0119688	0.3507	0.00705206	0.00766926	0.0113231	0.00659533	0.00339068	0.00445616	0.00281643	0.00106249	0.000978353	0.00193964	0.000963851	0.00125006
MCO	0	0	0	0	0	0	0	0	0	0	0	0	0	0	0	0	0	0	0	0	0	0	0	0	0	0	0	0	0	0	0	0	0	0	0	0	0	0	0	0	0	0	0	0	0	0	0	0	0
MNE	1.4502	1.39694	0.658848	0.200834	0.809832	4.45454	1.24206	0.932177	2.85525	0.507476	2.55111	1.75292	1.30554	4.01108	0.882056	3.66824	9.08493	0.445834	4.73353	0.251536	1.82095	2.79398	0.479988	2.23152	1.21829	1.84708	1.49975	4.27346	7.57326	2.04631	3.15714	0.676092	0.954768	1.1187	1.91298	0.918654	73.2865	0.812332	0.641478	2.84869	0.9876	0.631351	0.717816	0.501018	0.645155	0.6829	1.32981	0.588078	1.36772
MDA	2.43574	2.09715	1.01537	0.341481	1.0097	9.71281	1.32659	0.781751	3.20904	0.658461	3.13766	1.55538	1.57648	3.20823	1.43394	4.72796	3.55475	1.05737	3.36836	0.312739	2.18466	2.39225	0.765192	7.70196	1.49918	1.49239	1.06787	5.39691	11.3986	2.74638	1.99325	0.994099	0.929185	1.36688	1.6143	1.15654	16.5209	1.11335	0.660798	3.06531	1.1219	0.888378	1.0256	0.357282	0.845228	0.884476	0.910885	0.861816	0.813995
SMR	0.000347684	0.000136467	6.72E-05	3.15E-05	5.84E-05	0.000430334	0.000157187	8.21E-05	0.000427957	0.000142614	0.000271926	8.53E-05	4.87E-05	0.000307686	0.000161095	0.0003056	0.000115482	7.57E-05	0.000129004	4.79E-05	0.000187074	0.000240063	8.44E-05	0.000129448	0.000195334	0.000139561	0.000103102	0.000302272	0.000814618	0.000271709	0.000245185	0.000176526	0.000116646	0.000189532	0.000239566	0.000423246	0.00209693	0.000162807	8.08E-05	0.000184269	0.000153557	6.28E-05	0.000104907	7.56E-05	9.53E-06	8.75E-06	1.33E-05	1.02E-05	9.17E-06
SRB	2.35767	2.23305	0.939872	0.381614	1.25406	7.78297	1.83563	1.26483	4.46408	0.811957	3.98284	2.27247	2.08446	6.03009	1.36024	5.20217	14.2935	0.889862	5.67145	0.329148	3.29331	4.56565	1.12117	4.00322	2.12276	1.97497	2.39946	7.05933	20.7183	7.06993	5.96341	1.42324	1.74711	6.41374	3.32464	6.21772	74.6088	1.86564	3.20051	4.29208	2.3931	1.28666	1.43654	0.585212	0.948944	0.974325	1.82214	0.815917	1.85386
MKD	10.0194	8.30692	43.793	2.67025	4.8094	82.3036	3.93724	1.46471	15.0979	2.30041	28.5577	83.6607	41.7695	13.5833	2.8879	103.105	11.961	1.57731	9.93133	0.682744	11.5864	12.618	2.85345	25.6176	6.98852	27.4414	21.9053	24.054	46.2019	12.9611	15.2388	3.82818	3.4158	8.44793	6.063	3.41997	68.3659	6.08636	9.1573	104.271	5.30299	3.08014	2.2847	1.42765	1.47063	1.59148	2.57857	1.05074	2.46474
UKR	474.756	334.829	144.727	22.906	371.08	2677.12	248.938	151.122	508.827	79.9322	642.268	126.369	59.5797	1717.39	66.9809	1116.92	735.47	21.0446	775.24	5.83094	491.528	999.627	56.4083	267.277	158.67	56.6837	226.943	631.483	1355.59	187.511	490.235	195.155	165.653	60.4658	198.506	62.079	7811.81	76.2392	205.278	1314.09	171.45	108.393	50.3106	67.2847	9.50361	70.9703	143.017	14.3203	12.0273
DZA	1.57689	3.90995	0.117053	0.0509994	1.7403	9.68399	0.664885	0.0274596	14.206	0.281724	39.7767	3.36707	0.225131	0.298218	0.497655	16.6162	0.0462628	0.180365	0.0311666	0.0341942	7.57156	0.548738	1.4691	0.23225	1.94013	0.551158	0.113597	10.1658	47.4953	3.09354	4.72824	10.1727	1.11012	3.76632	1.11551	1.80318	0.831302	0.95734	2.70541	3.61852	1.73315	0.394145	0.207644	0.193435	0.0129412	0.0169231	0.0252877	0.0375131	0.00755283
AGO	23.2117	142.33	2.77068	0.89321	4.39356	121.264	27.7655	1.33162	137.548	7.30064	164.564	12.1632	2.44715	10.465	11.5536	83.443	2.49485	3.53219	1.43057	0.872565	51.7148	21.6501	119.914	4.97371	16.8578	4.5151	2.34722	78.0351	900.666	416.647	2265.54	72.0905	421.219	68.9571	27.7713	42.4382	48.5077	25.8097	10.8247	17.4738	128.047	8.80594	14.1642	55.9003	0.914929	0.692208	1.33147	2.44119	0.958733
BEN	0.893313	0.921444	0.090423	0.0275198	0.188782	3.47371	1.67075	0.0442196	4.07386	0.199679	4.98595	0.262258	0.0742468	0.355174	0.463348	4.69735	0.0726954	0.138144	0.0473694	0.0300072	0.503579	0.691122	0.291833	0.154096	4.34028	0.142636	0.0635128	4.84011	7.4353	1.06466	6.64012	0.493247	1.26624	1.86779	39.4217	1.07459	1.6062	0.5104	0.293753	0.522279	0.348298	0.179129	1.0423	0.947533	0.060139	0.0235001	0.0352185	0.480048	0.043501
BWA	0.0295929	0.0890608	0.00359723	0.00114487	0.00524816	0.361041	0.0262262	0.00168813	0.0746546	0.00831411	0.279241	0.0358634	0.00511186	0.0124798	0.0139895	0.164595	0.00426499	0.00561732	0.00208179	0.00117272	0.125964	0.0349401	0.0517048	0.00944439	0.0219427	0.00632013	0.00264827	0.62015	0.348687	0.0552431	0.0555723	0.0208486	0.037747	0.0160814	0.261334	0.0335002	0.0553788	0.0249623	0.0140229	0.025688	0.0231103	0.411185	0.0126481	0.792988	0.00159589	0.00160308	0.00236268	0.00219717	0.00179174
BFA	0.00498763	0.00647916	0.000537336	0.00012398	0.000963046	0.0223959	0.00379214	0.0002418	0.0180574	0.000680471	0.0329131	0.00113802	0.000306558	0.00154104	0.00244403	0.0329051	0.000322294	0.000456537	0.000207904	0.000113369	0.00445858	0.00381321	0.00380273	0.000802583	0.00262762	0.000685606	0.00038091	0.0105295	0.0356353	0.0259481	0.00626405	0.00218795	0.00516385	0.00153285	0.0110818	0.00559669	0.00694618	0.00180018	0.0071924	0.00631246	0.00101202	0.000821993	0.0014511	0.00102091	0.0001161	9.77E-05	0.000169309	0.000140509	0.000124784
BDI	2.14986	20.7492	0.16236	0.0564823	0.319768	27.4242	1.97804	0.0856147	4.93223	0.588952	15.5086	0.653935	0.14303	1.1555	0.853171	6.20848	0.139578	0.261075	0.0902342	0.0586158	17.9404	3.22359	0.635107	0.538773	2.60041	0.272057	0.610149	8.37301	12.7056	2.51388	5.34232	1.01534	1.99575	0.506938	1.03291	1.83613	5.25838	0.874065	2.5211	0.90579	0.516884	0.45349	0.410678	0.751847	0.0634778	0.0448254	0.0612912	0.0632773	0.0434636
CMR	19.3487	270.243	9.97548	0.567725	24.7066	177.425	12.591	0.507656	193.998	3.99903	549.968	25.4841	19.8833	8.20383	23.1833	376.642	0.803556	6.3976	0.71964	0.384261	162.821	14.1942	62.7387	6.67645	8.77041	6.56485	10.7336	358.313	130.685	26.264	59.8712	27.8036	14.0934	4.8199	14.1974	12.5214	21.8198	7.36501	40.9706	118.668	32.898	4.3655	3.36856	4.39966	0.249941	0.354367	0.500754	1.2965	0.205492
CPV	0	0	0	0	0	0	0	0	0	0	0	0	0	0	0	0	0	0	0	0	0	0	0	0	0	0	0	0	0	0	0	0	0	0	0	0	0	0	0	0	0	0	0	0	0	0	0	0	0
CAF	18.3769	49.3021	1.8945	1.85253	6.60476	60.7818	16.9108	1.55647	74.5805	4.95158	100.711	7.18755	1.81045	8.46797	9.69906	48.9307	1.67608	3.55441	1.28084	0.673888	10.6254	16.544	13.9463	3.07013	10.789	5.60235	2.55738	23.9575	134.03	20.6348	22.4982	11.7039	24.781	7.08885	16.1956	30.6416	36.9209	10.7921	7.61666	10.6781	9.02893	3.68321	7.91806	5.45438	0.736008	0.638292	0.937503	0.701519	0.95181
TCD	1.03005	0.869403	0.0821017	0.0312136	0.523081	2.72548	0.683061	0.0512346	2.02125	0.192096	2.68065	0.203674	0.139136	0.463147	0.420326	2.01863	0.0926926	0.152776	0.0523195	0.024585	0.358074	0.982949	1.14547	0.113338	0.503584	0.192702	0.0718494	0.785493	9.8117	0.957957	0.968689	9.25479	1.06828	0.33553	0.515582	1.31478	1.92874	0.416273	0.167143	0.406798	0.195898	0.151856	0.201492	0.212207	0.0352415	0.0286796	0.0411	0.0308227	0.0452457
COG	8.83858	13.3277	0.549032	0.240956	10.2981	47.4062	5.47141	0.645564	44.7648	1.52529	81.7245	5.96919	1.78101	2.15892	3.0837	94.247	0.453166	0.774119	0.293185	0.213463	31.9736	6.40816	34.5533	1.7222	3.66491	1.04507	0.773819	29.7246	131.658	31.1137	80.471	5.45467	44.2556	6.3834	79.3146	8.99325	9.18672	5.0703	3.95896	27.8432	57.8972	6.37705	3.3959	2.07172	0.154484	0.133656	0.246391	1.18524	0.15598
CIV	148.344	1333.41	9.93201	2.63415	180.899	668.683	54.6148	17.5372	1125.89	16.4275	4737.76	179.228	83.6015	88.9463	37.9556	1498.92	4.40582	18.2806	3.10531	1.61747	942.117	324.778	237.548	39.2446	39.334	28.3656	89.669	682.639	1720.34	128.21	119.666	174.684	41.1553	58.5541	2472.53	54.6842	390.033	81.5001	77.7442	67.8457	20.569	88.9794	39.2763	71.4057	1.54878	1.68049	4.28417	3.99746	1.11642
COD	58.963	730.259	5.59208	2.50827	13.6654	337.891	48.0841	3.26684	154.223	416.001	403.89	49.2595	6.13974	23.1943	32.338	567.874	4.94806	119.092	3.18919	1.62486	88.6516	61.3017	115.361	10.2443	40.3462	9.61225	4.63087	168.16	918.586	231.944	88.2891	31.9665	71.0305	19.8511	39.9491	64.0823	125.915	30.6478	54.3171	39.9041	15.4837	50.1115	12.0596	81.1538	1.63449	1.56655	2.39241	3.04477	2.01629
DJI	0	0	0	0	0	0	0	0	0	0	0	0	0	0	0	0	0	0	0	0	0	0	0	0	0	0	0	0	0	0	0	0	0	0	0	0	0	0	0	0	0	0	0	0	0	0	0	0	0
DOM	10.6292	128.778	1.01651	0.560886	3.28953	200.708	7.49047	0.577006	366.864	11.6341	166.335	8.7699	1.06315	3.55017	5.75163	169.67	0.690672	1.59814	0.717753	0.364974	330.014	7.32293	9.15652	1.94045	14.8373	1.81199	1.6766	335.428	1630.65	100.142	46.4236	153.718	32.8818	14.927	10.2482	49.7201	18.8066	17.7583	67.8656	24.5718	13.0391	14.5795	6.50394	6.55403	0.23911	14.6281	0.367111	0.50557	0.142961
ERI	0	0	0	0	0	0	0	0	0	0	0	0	0	0	0	0	0	0	0	0	0	0	0	0	0	0	0	0	0	0	0	0	0	0	0	0	0	0	0	0	0	0	0	0	0	0	0	0	0
ETH	109.567	172.968	11.1036	6.29685	28.4335	702.957	61.0667	5.39896	181.515	31.321	336.603	100.694	20.7341	33.0279	110.01	347.527	8.08142	14.1153	5.27408	5.70227	221.096	83.0236	42.9805	35.0693	54.5934	18.147	25.4622	298.463	861.878	622.092	202.412	91.3603	64.756	73.9493	175.074	64.8316	202.472	77.3852	101.866	130.383	40.4863	51.5597	93.5227	50.808	6.25157	5.6714	7.58242	5.9407	9.03948
GAB	4.6252	11.0933	0.502496	0.56156	1.43611	31.0691	3.71681	0.193381	30.5805	1.54847	223.582	9.39894	0.775846	1.75817	4.63919	73.0868	0.308605	0.897639	0.206027	0.182479	33.2628	5.96238	18.4364	1.98945	3.43632	0.821168	0.520044	27.4549	146.094	14.3615	75.7269	5.60952	17.7649	2.60208	6.95152	5.50174	5.63651	3.91167	4.56172	12.1505	4.89141	4.90835	1.52415	6.90673	0.118808	0.12692	0.225692	0.240586	0.133874
GMB	0.308362	1.41015	0.147887	0.00845832	0.0427706	0.929584	0.175496	0.0121671	0.463468	0.0617267	1.76691	0.0706962	0.0225903	0.0812696	0.176507	0.83666	0.0156351	0.0411944	0.0127807	0.00733855	0.574794	0.140182	0.0481694	0.0481229	0.152756	0.0339613	0.0206744	4.76667	1.65155	0.514006	0.247509	0.0998794	0.261941	0.0794372	6.63154	0.281783	0.283154	0.118945	0.18243	0.112267	0.0664973	0.0582637	0.0505377	0.103863	0.00669876	0.0052674	0.00628604	0.13127	0.00566095
GHA	38.996	230.109	4.05422	1.36893	30.7614	277.506	41.0516	10.2721	166.201	39.4382	659.663	68.051	20.9291	7.70272	55.0654	291.337	2.55774	42.0643	1.36489	1.15259	359.023	34.1251	47.2629	53.4651	32.6279	4.65195	12.8376	817.638	326.128	230.628	203.963	139.965	36.7418	7.96045	388.773	19.3844	48.8821	43.2081	86.9931	88.7432	21.7978	39.8049	7.36525	15.3232	0.437504	0.936782	0.691606	1.40881	0.331733
GIN	26.7913	203.559	1.38736	0.450318	8.0089	101.559	8.82553	0.738484	115.553	3.27226	118.923	8.85736	2.50525	16.5465	84.5189	66.0482	0.962252	1.68006	0.694133	0.595875	154.538	17.4801	6.66743	5.66353	8.18477	2.241	2.92009	34.2702	129.3	31.7096	21.2457	25.9005	70.7545	3.86575	16.6824	12.2718	66.8346	5.72023	13.2081	8.2509	4.38773	3.61433	3.29385	2.92443	0.315796	0.336953	34.4831	0.413111	0.282024
KEN	24.9398	145.254	11.3795	1.78544	8.40006	279.281	19.5116	4.314	85.9179	17.7731	217.215	24.6275	2.8067	6.33654	41.9792	138.928	1.16645	21.2278	15.5441	0.941253	629.547	57.2622	20.2457	12.0091	45.6689	3.10229	4.0658	1328.96	404.453	171.698	160.483	59.1201	21.3553	13.4149	381.107	16.3009	254.936	36.7868	38.4185	139.058	9.4122	20.1178	72.1764	21.3556	186.127	0.88908	1.06605	5.75184	0.484891
LSO	0.00615966	0.0079044	0.00064088	0.0004654	0.00137838	0.0220592	0.00531144	0.000385489	0.0259559	0.0021216	0.0252129	0.00443618	0.00101609	0.00271867	0.00594874	0.0174954	0.000638818	0.00174475	0.000406067	0.000527206	0.00718745	0.00508236	0.0047194	0.00256967	0.00396198	0.001188	0.000725708	0.0798105	0.0917338	0.0126158	0.0129887	0.00617228	0.00867723	0.0043475	0.01181	0.00717357	0.00953505	0.00737108	0.00242581	0.0046	0.00512465	0.00182171	0.00426265	0.136402	0.000341391	0.000313037	0.000411895	0.000438733	0.000343001
LBR	5.66743	12.3383	0.727702	0.329165	1.34619	65.5739	8.43857	0.356477	16.1368	4.61484	27.6714	7.77494	2.76747	2.55499	3.17027	21.697	0.743603	1.50673	0.66524	0.279473	4.95631	9.36043	2.30338	1.65577	3.48693	1.10411	1.08425	12.0152	43.8702	7.5676	15.6743	3.33308	14.0481	2.43741	14.0562	6.29468	16.3905	4.327	4.57337	6.9266	2.29607	136.711	2.72361	2.38695	0.39295	190.923	0.497961	0.455795	0.558497
LBY	0.00867469	0.00772404	0.000536633	0.00237128	0.00161975	0.0705339	0.00206414	0.000230097	0.0460092	0.00108171	0.039054	0.198386	0.00344042	0.00152692	0.0025911	0.155948	0.000232223	0.00523872	0.000137831	0.00152074	0.0234662	0.00318387	0.00770027	0.00155717	0.00832207	0.00105173	0.000820278	0.040601	0.0297414	0.115234	0.00826103	0.00368002	0.00587838	0.00173097	0.0111154	0.003204	0.00468417	0.00330049	0.0316932	0.0317239	0.00146349	0.00276768	0.00163695	0.00155851	6.48E-05	0.000199399	0.000168879	0.000449113	4.32E-05
MDG	48.9533	75.681	7.66517	0.986674	14.1522	345.987	28.7976	12.7686	114.505	9.7937	1580.77	22.5987	11.4645	7.46688	10.0675	261.112	1.53722	4.01548	2.08094	0.66017	104.146	18.7624	24.6802	6.52086	22.7005	3.97138	7.03984	139.886	3047	138.992	102.248	208.104	37.8791	50.2197	68.7622	36.919	34.4796	37.171	24.816	15.3971	24.8866	11.6878	38.9391	12.7228	0.913882	0.524977	0.722441	1.96787	0.394975
MWI	7.20388	16.9487	1.5557	0.400683	5.0065	55.2362	14.6007	0.352387	37.265	2.75271	106.25	14.5285	2.36281	6.51053	6.48574	32.3436	0.757539	2.34677	0.406963	0.370986	101.604	12.5436	6.70089	4.53445	7.52033	1.27537	2.41982	348.923	95.6612	72.7861	26.0717	13.9114	8.8401	3.93718	55.7369	7.43279	37.7571	18.4353	9.20619	5.88732	3.77066	3.3534	14.7145	132.175	0.405226	0.307334	0.473053	0.517712	0.407397
MLI	0.175254	0.608154	0.0206244	0.00546979	0.0745478	0.899394	0.160631	0.0114688	4.43686	0.117107	6.08197	0.107915	0.0163932	0.0732198	0.12761	0.986561	0.0148812	0.0371674	0.00865932	0.00540824	1.91178	0.204518	0.153485	0.0471041	0.112576	0.0306218	0.0241764	0.90536	6.02204	0.360718	0.265821	0.301257	0.266568	0.149666	0.453676	0.232081	0.339825	0.120312	0.109868	0.108814	0.0665069	0.0786206	0.0750587	0.0795878	0.00527075	0.00444501	0.00849589	0.00700043	0.00550078
MRT	6.99E-05	0.000112613	1.40E-05	3.33E-06	1.15E-05	0.000302871	8.26E-05	8.12E-06	0.00170389	3.43E-05	0.000692942	0.000288265	2.49E-05	3.07E-05	2.83E-05	0.00105485	1.14E-05	7.99E-06	8.71E-06	2.07E-06	5.52E-05	6.45E-05	0.000371087	3.46E-05	5.49E-05	0.000178152	6.33E-06	0.000162038	0.000722763	0.0139675	0.000554598	4.22E-05	0.000136281	2.98E-05	4.70E-05	0.000105645	0.0012763	8.02E-05	3.02E-05	0.000210844	4.10E-05	5.27E-05	1.70E-05	2.22E-05	1.86E-06	2.44E-06	3.23E-06	3.03E-06	1.62E-06
MUS	0.588453	1.12833	0.0444036	0.0265075	0.18173	14.3336	0.340656	0.0225065	2.85025	0.255948	20.0567	0.301481	0.0817195	0.170339	0.960361	3.26193	0.0327993	0.237353	0.0228083	0.0246503	1.40424	0.62594	1.77045	0.142145	0.869248	0.139466	0.0592749	31.5925	6.68098	2.97223	1.56873	1.12919	0.506388	0.227547	2.42096	0.37031	0.633887	1.12432	1.30286	0.302979	0.224161	0.296009	0.179315	0.751271	0.0195799	0.0180227	0.0250832	0.123019	0.0173209
MAR	1.03707	4.31102	0.34881	0.0568182	0.727822	8.02325	0.392171	0.0890336	34.1448	0.775097	45.3516	1.43329	0.279064	0.453373	0.694584	15.3647	0.518567	0.620435	0.0893748	0.06942	4.10082	1.87828	7.28048	0.397082	1.15172	0.20875	0.487782	9.69882	9.09456	5.22754	4.66774	2.50983	1.50358	0.860214	2.42427	1.19378	5.96945	1.50195	2.25405	4.88124	0.481465	0.908563	0.143572	0.322526	0.0121874	0.0213554	0.0259585	0.039564	0.00417023
MOZ	164.331	330.28	15.8659	4.06634	34.6776	1957.1	109.695	6.30567	449.835	34.0629	582.915	50.6096	13.2643	55.4055	58.8021	445.239	11.6623	18.1603	7.15118	3.30291	2301.15	115.645	606.684	41.8992	166.477	421.277	12.8051	555.55	1371.58	1010.24	536.854	73.3802	185.447	44.0859	4623.34	138.029	336.617	84.436	69.3918	253.185	42.7395	36.6246	140.953	1262.55	12.8154	2.81351	4.7988	9.47742	4.06408
NAM	0.19751	0.23025	0.0170641	0.00689257	0.018367	0.711769	0.0484524	0.00366595	3.49303	0.0291634	0.765391	0.0388303	0.00825554	0.0356867	0.0816284	0.532882	0.00765167	0.0399299	0.00340701	0.00180354	0.435861	0.0694288	0.128268	0.0134789	0.0465104	0.0107824	0.0168638	0.629344	0.796301	3.03282	0.537505	0.129583	0.151139	0.0516856	0.157138	0.053782	0.757818	0.234109	0.0515557	0.0373098	0.0446354	0.103561	0.0237811	1.20145	0.00132645	0.00152684	0.00363756	0.00315802	0.0012197
NER	0	0	0	0	0	0	0	0	0	0	0	0	0	0	0	0	0	0	0	0	0	0	0	0	0	0	0	0	0	0	0	0	0	0	0	0	0	0	0	0	0	0	0	0	0	0	0	0	0
NGA	29.3194	30.3601	0.477566	0.19765	3.87592	50.3845	3.74149	0.271041	64.1296	1.42022	84.1523	3.98867	2.06541	1.65726	5.29572	46.9391	0.445166	1.98928	0.203756	0.140455	51.0318	8.51762	35.9699	0.87041	44.5925	0.664758	0.611684	60.4916	192.193	89.0629	53.8547	49.2238	13.9339	32.5693	68.5977	8.40073	9.52013	33.4046	53.904	15.9057	10.8778	2.99956	40.5998	42.3838	0.0960585	0.104986	0.193402	0.834463	0.0623438
RWA	2.00138	9.34054	0.201819	0.119914	0.429955	23.3311	2.30536	0.103659	10.2704	0.546251	8.38001	1.37216	0.305331	1.63093	1.43273	6.57318	0.202848	0.469947	0.117321	0.139996	21.1857	1.51217	1.14155	4.90257	1.44339	0.33413	0.192338	9.28868	25.0377	2.25452	2.73679	0.984822	2.17909	0.765956	5.59664	1.6466	3.0883	1.75777	0.751725	1.1778	0.723534	0.466697	0.803053	1.68454	0.112198	0.0876107	0.115978	0.142759	0.0948103
STP	0	0	0	0	0	0	0	0	0	0	0	0	0	0	0	0	0	0	0	0	0	0	0	0	0	0	0	0	0	0	0	0	0	0	0	0	0	0	0	0	0	0	0	0	0	0	0	0	0
SEN	0.125367	0.578635	0.0162107	0.00534752	0.0362645	0.924245	0.131226	0.00639729	1.5651	0.042172	4.10232	0.536034	0.0160265	0.0470181	0.133237	3.63313	0.00925735	0.0247614	0.00671921	0.01883	0.631673	0.121555	0.335547	0.027286	0.0972009	0.0242508	0.0131444	0.933697	3.45635	3.2009	0.98407	0.169998	0.717365	0.112262	1.12997	0.281585	0.236134	0.118309	0.296304	0.0907489	0.439916	0.0780784	0.168568	0.054865	0.0061719	0.00515879	0.00787297	0.00876951	0.00493401
SYC	0	0	0	0	0	0	0	0	0	0	0	0	0	0	0	0	0	0	0	0	0	0	0	0	0	0	0	0	0	0	0	0	0	0	0	0	0	0	0	0	0	0	0	0	0	0	0	0	0
SLE	5.14669	6.51125	0.456158	0.12204	7.15029	16.7077	5.48096	0.736294	9.06361	0.879499	36.1688	18.0982	0.456008	3.70614	2.63726	13.1638	0.440739	0.450193	0.260707	0.113488	2.11946	3.76284	0.626681	0.534789	3.3078	2.22953	0.543077	5.04519	38.7327	22.2956	5.08084	6.84886	12.6865	1.15851	2.08062	5.49215	8.935	1.80333	0.830119	2.08765	1.04836	0.844951	0.951827	2.13845	0.10926	0.0892338	0.124436	0.190603	0.113117
SOM	0.280204	0.388957	0.029157	0.0163826	0.0544643	1.10631	0.238512	0.0157833	0.88221	0.099331	1.28261	0.174423	0.0659998	0.11955	0.258769	3.16196	0.0249838	0.0873747	0.0169132	0.0678543	0.47196	0.22177	0.0919493	0.0538763	0.198283	0.0482212	0.0323271	0.932712	4.69771	1.40381	4.45537	0.249809	1.26398	0.278906	2.11157	0.356521	0.601227	0.546669	0.168212	0.28669	0.523664	0.163234	0.298073	0.15916	0.0151744	0.00954941	0.0138526	0.0308303	0.0107933
SDS	0	0	0	0	0	0	0	0	0	0	0	0	0	0	0	0	0	0	0	0	0	0	0	0	0	0	0	0	0	0	0	0	0	0	0	0	0	0	0	0	0	0	0	0	0	0	0	0	0
SUD	0	0	0	0	0	0	0	0	0	0	0	0	0	0	0	0	0	0	0	0	0	0	0	0	0	0	0	0	0	0	0	0	0	0	0	0	0	0	0	0	0	0	0	0	0	0	0	0	0
SWZ	8.90252	11.1314	0.962817	0.848913	2.52757	36.2249	7.2528	0.601428	82.9274	8.7697	69.7975	16.7991	3.48539	4.23941	9.98467	112.003	1.16017	3.29874	0.666166	0.899	20.3376	7.49084	9.33074	7.91356	6.24572	2.30372	1.44374	96.0798	231.456	291.567	38.7061	10.25	125.399	8.9088	48.0575	17.7381	15.154	26.1356	4.24086	7.84715	14.4708	3.65469	84.2163	33.0265	4.9421	0.736094	1.2185	3.20197	1.37962
TGO	5.6854	25.9969	1.84699	0.201758	4.75956	124.52	5.46641	0.256461	28.8842	1.43118	100.597	3.65021	9.40173	2.15192	3.71191	57.6112	0.405878	0.864539	0.286084	0.211561	26.3198	5.80697	10.0367	2.66488	3.61643	0.955641	0.790955	60.2177	43.7673	9.12249	63.2832	4.07848	6.04554	3.54743	18.3826	5.73315	9.02564	3.01857	21.4195	17.1131	2.33164	1.51469	2.86569	7.87378	0.17705	0.161653	0.275379	1.19234	0.173501
TUN	2.50358	1.52341	0.0508248	0.058453	0.262182	4.46888	0.200012	0.013585	3.78044	0.115384	20.5131	0.520781	0.088229	0.301926	0.2174	11.4014	0.0172676	0.374264	0.0104214	0.0348426	1.08153	0.338363	0.783805	0.17102	0.401593	0.0728701	0.144286	2.47093	2.98174	5.0821	0.515813	0.327669	0.240855	0.239353	0.592552	0.169607	0.334402	0.277921	0.70344	0.765191	0.159571	0.233132	0.149718	0.142359	0.00501461	0.00648875	0.00923857	0.039359	0.00304913
UGA	23.6988	225.095	4.20874	1.61899	9.16957	218.744	24.5499	0.896471	124.659	6.29693	172.606	17.3542	4.22571	22.2681	11.2528	143.925	5.33368	4.95061	1.75944	0.980038	648.895	94.225	46.367	19.8621	21.3214	9.06877	5.58334	231.229	203.011	69.2206	64.7791	30.5772	21.7494	9.41847	26.58	16.3943	35.0378	84.1241	118.37	18.8538	8.49801	10.3232	8.98908	8.62545	1.35099	0.709061	0.91195	131.937	0.664209
TZA	82.3549	302.416	31.0412	5.75231	34.0019	856.285	75.2512	2.38307	319.768	57.8238	588.957	116.807	5.37913	114.564	32.3516	885.648	3.35389	10.7841	2.71235	2.19694	1176.54	138.614	79.0391	31.2949	56.828	9.6853	19.6067	894.802	1633.48	1151.07	309.054	197.053	133.892	91.0543	2667.97	114.289	167.393	160.141	82.3871	137.062	37.515	66.2494	114.643	85.8619	5.38707	4.51214	3.32648	20.6166	3.10672
ZMB	32.0458	119.145	4.10016	0.907942	8.09436	333.862	37.2697	1.42488	117.457	178.362	174.181	26.4764	3.42306	11.8416	17.5292	122.076	2.33912	5.36606	1.57192	0.757252	241.958	25.4668	31.6903	5.11253	28.3332	5.04272	2.60261	750.304	346.111	314.603	149.305	27.2493	43.4509	9.72802	198.139	32.628	52.2864	38.8685	62.7201	20.1788	19.0814	25.2948	20.0242	412.565	2.21123	0.7287	1.35117	2.47246	0.978028
ZWE	11.7352	24.641	3.40934	0.485571	5.23646	171.689	12.1885	0.449672	69.1524	7.80124	71.1224	11.9	2.52799	4.09991	12.9396	45.3574	0.76477	4.81421	0.676552	0.400062	111.72	9.71151	14.6665	4.9772	13.1188	3.4672	1.729	286.26	171.125	81.6368	35.0834	12.2274	13.736	6.0598	36.2962	14.3834	19.4056	27.1685	10.7992	8.33155	7.67576	10.3317	6.45547	741.662	0.687768	0.75005	1.04081	1.54767	0.519967
BHR	0	0	0	0	0	0	0	0	0	0	0	0	0	0	0	0	0	0	0	0	0	0	0	0	0	0	0	0	0	0	0	0	0	0	0	0	0	0	0	0	0	0	0	0	0	0	0	0	0
EGY	0.0836908	0.165801	0.0345861	0.0402052	0.0467297	0.951285	0.0418898	0.004369	0.45154	0.0455925	0.59394	0.385861	0.0172509	0.0336234	0.0322258	1.21494	0.0118023	0.00829588	0.0037226	0.00986336	0.404501	0.082535	0.102689	0.0875721	0.120998	0.0168982	0.0111773	0.874843	1.01143	0.208828	0.220029	0.261748	0.154915	0.0524432	0.149558	0.0538536	0.303568	0.0526596	0.0944293	0.31784	0.0379833	0.0811645	0.0668584	0.0952125	0.00191826	0.00156671	0.00289994	0.137339	0.000710701
IRN	0.299852	0.369166	0.0341125	0.0228718	0.0908958	2.14423	0.211958	0.0182737	2.14765	0.144695	1.83465	0.708758	0.0318019	0.141864	0.14129	2.45127	0.0311208	0.237687	0.01857	0.025866	0.64344	0.218421	0.270512	0.129887	0.924693	0.037189	0.0697281	0.757198	2.68083	2.01021	2.0047	0.359158	0.937065	0.14615	1.30081	0.297801	0.766674	0.311539	0.437292	0.986757	0.279919	0.199069	0.206671	0.809068	0.613438	0.288686	0.361498	0.0491531	0.00613571
IRQ	0.0619154	0.00670848	0.000454658	0.000165581	0.00345597	0.0356594	0.00414116	0.000239438	0.0971671	0.00145909	0.0689633	0.0128965	0.00789282	0.00221674	0.00206523	0.0992686	0.000391742	0.000672598	0.000208294	0.000173087	0.0314363	0.00324027	0.0101882	0.00108244	0.00242846	0.000864815	0.000535472	0.0118902	0.164668	0.0172743	0.0396462	0.0894351	0.0140866	0.00949427	0.00391071	0.00626316	0.0120048	0.0119852	0.00212826	0.00442662	0.00457172	0.00164237	0.00223411	0.000719188	7.23E-05	6.77E-05	0.000108318	0.000134618	4.00E-05
ISR	0.188115	0.921683	0.0323472	0.0716923	0.125966	1.86436	0.136021	0.0101078	0.935068	0.170268	1.67066	0.342015	0.0410909	0.101972	0.198068	1.26822	0.0163645	0.0506383	0.0188468	0.0190078	0.85839	0.240632	0.0897248	0.120128	0.217895	0.0338684	0.0468006	1.8077	4.77866	0.575601	0.591641	0.488259	0.231669	0.165374	0.418095	0.253239	0.371242	0.295162	0.434147	0.593566	0.124787	0.236591	0.0856892	0.187676	0.00279099	0.00569574	0.00925619	0.00637194	0.00162635
JOR	0	0	0	0	0	0	0	0	0	0	0	0	0	0	0	0	0	0	0	0	0	0	0	0	0	0	0	0	0	0	0	0	0	0	0	0	0	0	0	0	0	0	0	0	0	0	0	0	0
KWT	0	0	0	0	0	0	0	0	0	0	0	0	0	0	0	0	0	0	0	0	0	0	0	0	0	0	0	0	0	0	0	0	0	0	0	0	0	0	0	0	0	0	0	0	0	0	0	0	0
LBN	0.17044	0.435321	0.0541696	0.0902898	0.0315587	0.916924	0.129478	0.00929147	0.554905	0.0429521	1.1643	0.318848	0.0122368	0.0664551	0.0773077	0.622448	0.0142161	0.0381394	0.00788529	0.0311047	0.154426	0.106424	0.0420809	0.16586	0.13296	0.0202941	0.0129109	0.698889	2.05895	0.243818	0.193653	0.208164	0.208292	0.0803734	0.193427	0.167155	0.471053	0.218344	1.19482	2.12026	0.0441131	0.0860117	0.0746367	0.0535377	0.00705523	0.115606	0.0119698	0.00679578	0.00359208
PSE	0.00616024	0.00586256	0.000297676	8.48E-05	0.00027726	0.0242769	0.00347904	0.000249684	0.012715	0.001062	0.0217245	0.000364298	0.000124575	0.00165644	0.0015718	0.0148465	0.00039209	0.000473349	0.000186258	0.000128012	0.00185408	0.0027181	0.000348167	0.000285686	0.00145959	0.000565172	0.000216865	0.00367631	0.0545113	0.00532231	0.00292539	0.00258531	0.00785075	0.00100758	0.00207232	0.00574748	0.0126192	0.000920061	0.000553491	0.00195589	0.000504896	0.000485688	0.000997143	0.000301698	3.93E-05	3.21E-05	5.28E-05	5.37E-05	2.84E-05
OMN	0	0	0	0	0	0	0	0	0	0	0	0	0	0	0	0	0	0	0	0	0	0	0	0	0	0	0	0	0	0	0	0	0	0	0	0	0	0	0	0	0	0	0	0	0	0	0	0	0
QAT	0	0	0	0	0	0	0	0	0	0	0	0	0	0	0	0	0	0	0	0	0	0	0	0	0	0	0	0	0	0	0	0	0	0	0	0	0	0	0	0	0	0	0	0	0	0	0	0	0
SAU	0	0	0	0	0	0	0	0	0	0	0	0	0	0	0	0	0	0	0	0	0	0	0	0	0	0	0	0	0	0	0	0	0	0	0	0	0	0	0	0	0	0	0	0	0	0	0	0	0
SYR	0.0793874	0.116907	0.0757777	0.0876403	0.0345294	1.00265	0.0336237	0.00258512	0.336263	0.0185865	0.625978	0.161891	0.0233912	0.0266442	0.0270543	1.23778	0.00419141	0.0165412	0.00327947	0.00605393	0.777153	0.0377979	0.0733253	0.145178	0.0440428	0.0081131	0.00895447	0.344472	1.43016	0.174597	0.177985	0.126934	0.114625	0.238385	0.147848	0.120565	0.515952	0.076754	0.071215	1.46886	0.0490117	0.0228543	0.0336533	0.0296714	0.00241438	0.00778568	0.0164615	0.0106391	0.00138067
ARE	0	0	0	0	0	0	0	0	0	0	0	0	0	0	0	0	0	0	0	0	0	0	0	0	0	0	0	0	0	0	0	0	0	0	0	0	0	0	0	0	0	0	0	0	0	0	0	0	0
YEM	0	0	0	0	0	0	0	0	0	0	0	0	0	0	0	0	0	0	0	0	0	0	0	0	0	0	0	0	0	0	0	0	0	0	0	0	0	0	0	0	0	0	0	0	0	0	0	0	0
tot	25919.3	48295.5	8261.69	1362.18	17485.4	205983	25847.4	13770.4	119429	86269.9	161403	24250.9	7419.07	20158.9	25897.2	134794	13211.4	4058.64	19015.5	670.636	80761.6	44053.2	33316.5	15048.2	129526	6019.5	6623.53	209376	2.53123e+06	265651	546063	553742	81997.8	2.87388e+06	130694	212751	476198	114101	22705.3	56527.4	60152.5	46843.4	886035	65293	1113.05	2148.02	5715.58	18677.9	330.242
[truncated: 140 more columns]

## Sheet: 2005
GID	AUT	BEL	BGR	CYP	CZE	DEU	DNK	EST	ESP	FIN	FRA	GRC	HRV	HUN	IRL	ITA	LTU	LUX	LVA	MLT	NLD	POL	PRT	ROU	SWE	SVN	SVK	GBR	USA	JPN	CHN	CAN	KOR	BRA	IND	MEX	RUS	AUS	CHE	TUR	TWN	NOR	IDN	ZAF	AFG	ARM	AZE	BGD	BTN
AUT	10283.7	89.9137	17.2436	3.0883	179.964	1803.76	50.6534	4.91813	336.637	37.2453	621.73	128.817	104.712	200.145	50.5618	2135.9	12.4254	6.4444	9.01457	5.34231	102.143	175.958	49.263	70.3179	92.6465	85.3218	74.6318	539.276	869.319	385.706	181.174	103.171	54.778	31.7907	62.7404	60.4892	184.856	76.2668	278.72	150.341	45.6803	47.6457	16.2374	16.8537	1.22161	2.07307	3.03936	2.01882	0.832616
BEL	16.528	976.394	1.32557	0.606168	9.83084	223.025	14.878	0.753052	92.6485	9.64824	438.648	14.8675	2.45672	6.85711	22.0384	101.533	1.65922	1.46033	1.27444	0.3944	115.151	18.1809	13.6005	3.4821	21.9276	2.11324	3.269	214.692	182.059	23.1618	40.5508	18.2942	11.4194	7.60393	15.6827	11.678	23.445	20.3031	20.2909	31.4322	4.39065	11.4382	3.68576	4.36015	0.242893	0.397699	0.394673	0.528485	0.0393059
BGR	36.4996	23.0455	3333	2.26785	29.167	155.179	11.5151	1.03131	59.5292	6.67673	113.057	359.849	12.5952	33.7214	11.1399	314.892	4.23342	0.772676	2.27848	1.66714	18.084	42.3206	8.61724	42.3134	26.3558	6.61796	7.65634	98.1492	150.733	22.8638	33.4564	18.1794	15.8173	10.978	40.7002	10.3206	41.8376	14.9688	14.7488	391.279	11.1648	11.9029	7.95355	3.07797	1.8	7.10301	5.4792	0.811746	0.673934
CYP	0.0553329	0.0524883	0.0194145	9.71896	0.0328577	0.186363	0.0422373	0.00915387	0.0785072	0.030224	0.0897382	0.583911	0.014853	0.0256848	0.04347	0.10655	0.0125624	0.0102271	0.021988	0.00445745	0.0428197	0.0391441	0.0337338	0.0197074	0.0878649	0.0158935	0.0166097	0.313723	0.24367	0.138477	0.103407	0.0484621	0.0491074	0.0363985	0.066934	0.0411771	0.16965	0.0543285	0.0375643	0.144521	0.0511172	0.0655563	0.0273372	0.0193707	0.00219581	0.0180744	0.00437667	0.00315816	0.000889491
CZE	980.65	230.002	40.0642	3.23789	10703.2	3277.16	120.279	11.0187	407.678	68.4053	721.142	156.066	88.835	357.429	62.721	1041.63	36.221	13.1259	22.8941	2.76155	213.285	701.704	55.2354	169.47	203.678	107.496	693.573	775.807	1105.73	174.233	192.145	81.5151	65.7942	46.1568	80.9501	60.1401	444.087	149.79	155.101	117.126	56.5749	97.9556	28.2371	26.4799	2.21325	3.36997	7.87907	3.85675	1.15215
DEU	865.492	587.671	35.6607	7.23586	336.333	17620.8	348.275	16.078	1065.86	144.976	2474.96	285.896	74.5383	239.257	178.559	1669.94	35.2169	30.8223	27.1894	5.37165	619.416	648.387	160.254	111.548	401.255	70.6169	110.136	1917.22	2591.02	342.564	503.037	201.301	150.314	111.294	183.801	155.223	579.946	205.263	637.054	384.41	125.203	182.075	42.0386	56.1639	3.02432	4.08822	8.88098	5.88992	0.428326
DNK	53.0348	57.2346	3.39019	1.07482	39.7901	769.491	4345.82	3.88331	129.485	69.8122	316.91	24.9538	12.544	39.1317	77.3494	164.642	9.65173	4.94014	9.04648	0.919921	118.309	90.8575	25.3497	8.36086	435.1	6.41104	12.5046	513.211	321.97	78.0467	73.8993	35.7723	30.1336	14.8163	43.2806	17.1817	50.5924	42.2471	65.0646	27.9525	19.6406	323.195	7.60591	7.49904	0.530881	0.516908	1.26871	1.48822	0.1761
EST	87.8795	66.8065	5.89219	1.48512	72.2832	934.22	554.277	4484.6	207.645	1248.6	341.891	34.5434	23.7161	57.1619	174.893	260.727	89.8644	4.71183	180.97	1.63345	136.574	171.272	45.558	15.087	866.118	10.0505	24.8771	1062.79	826.465	195.914	132.994	56.6772	81.4089	20.206	84.3465	24.8769	387.63	100.801	51.5268	45.3562	35.6342	743.828	13.6855	9.54984	2.04145	3.2471	8.1272	2.83378	2.90681
ESP	51.6518	117.556	9.05897	3.46555	32.4294	600.499	39.0291	2.46572	19346.1	28.8058	1469.71	116.604	13.727	27.1624	72.1525	688.638	5.35893	7.49136	4.02073	3.95092	110.175	87.986	999.538	23.9954	71.7271	14.6571	11.2648	727.246	917.108	111.735	147.542	71.8871	47.6089	56.8898	61.4742	141.751	111.648	60.7211	67.6825	129.889	33.4524	53.0905	13.9979	19.8876	1.0151	1.23542	2.09677	2.46822	0.200726
FIN	1258.8	2164.7	104.306	43.5103	544.173	9855.92	2243.47	381.13	6201.07	105883	7903.98	1336.8	152.869	627.057	1432.56	5294.07	201.472	89.9551	259.828	19.7639	2206.27	1963.11	703.389	235.492	4229.58	140.024	238.882	13670.4	14344	5497.76	3150.27	1167.6	1058.79	719.634	1219.33	800.711	4921.97	1853.01	1199.89	1843.88	819.967	2611.12	254.184	316.741	13.9985	21.3259	39.5727	33.2315	2.3928
FRA	183.35	838.818	15.3483	4.88123	102.719	1826.2	126.851	5.40624	2140.68	74.4955	25127.2	197.428	34.554	90.9058	161.031	1869.31	11.9958	43.8771	7.43422	4.08555	431.382	224.594	267.411	59.3838	173.716	34.4984	31.2223	2057.24	2002.23	286.876	357.644	169.007	134.641	143.779	132.694	126.24	242.412	199.762	454.466	249.567	90.2467	84.4691	32.438	56.1333	1.9599	3.22234	4.77018	5.06281	0.276579
GRC	6.45117	7.44899	16.5854	11.8696	3.38263	40.9433	3.97564	0.402834	19.6245	3.03612	23.3144	1833.39	2.15197	3.82241	6.55774	60.2942	1.11461	0.813803	0.70557	1.5207	9.87602	7.36826	4.32724	14.0112	7.9658	1.80866	1.49597	33.8514	42.9406	11.8531	14.5157	8.90818	7.21827	3.10696	5.88459	4.52589	13.7733	8.97382	6.58243	42.2137	2.79571	5.89377	2.66196	3.15165	0.514422	4.35492	0.989276	0.230964	0.0675633
HRV	39.7643	11.048	2.91934	1.17458	10.9379	95.5481	9.16126	0.451671	31.1082	6.38284	44.1426	12.8253	1446.3	40.4988	5.09262	309.585	1.04493	1.11067	0.661953	0.549904	8.72513	11.4721	4.59293	18.7712	16.5018	101.264	5.47278	31.9409	69.9685	11.4872	12.6857	6.66422	5.33712	3.87964	6.01208	4.87087	11.7238	6.27687	15.958	13.0119	4.41526	7.64353	2.18851	1.70619	0.134678	0.229855	1.12391	0.175969	0.128895
HUN	323.174	61.929	31.9346	1.56485	167.437	816.35	61.2468	8.02703	134.144	26.5859	318.826	72.3091	191.669	4706.63	21.6818	579.467	15.1453	3.77692	9.7175	0.979422	77.9805	245.645	24.4162	223.876	70.6745	90.0654	131.086	225.169	272.255	55.2327	70.8639	27.7517	25.4932	15.8598	27.4221	21.5051	304.593	34.1067	63.446	83.6328	22.0705	48.0736	12.9445	9.37643	0.673378	1.45791	3.26819	1.48453	0.474263
IRL	25.4349	70.6703	2.61793	1.34507	18.4462	267.928	45.8471	2.8387	143.211	22.2237	248.572	17.3744	4.77673	15.1024	3125.56	121.874	2.143	6.11824	4.06693	1.31312	92.2658	26.5878	18.7942	5.76111	76.2492	3.63975	4.98086	1888.2	508.354	54.4054	99.859	31.1849	24.7371	14.1818	34.5135	24.0926	39.1839	42.0384	39.0006	45.6889	24.5233	51.2561	9.59206	13.6773	0.92141	0.604025	1.80162	1.16446	0.42399
ITA	47.1874	44.1958	6.02726	1.56685	18.3629	270.7	16.6883	1.22673	185.351	10.9596	334.972	74.1951	19.067	20.037	15.7852	6078.22	2.09269	2.21783	1.70318	2.35391	34.1369	36.5601	26.2911	22.0813	26.5601	14.9403	7.92273	199.286	311.798	51.6283	55.5149	28.8084	23.0645	14.5488	21.9446	23.7896	57.6013	33.1895	59.7102	56.3513	13.894	13.4521	5.19138	6.21424	0.288605	0.827464	0.949547	0.826182	0.0601032
LTU	91.1373	157.326	11.2608	4.27025	67.8123	1439.23	497.792	124.563	170.466	168.493	497.059	30.5927	13.3819	45.3976	91.8189	242.661	9788.31	16.3269	441.037	1.99713	199.556	508.572	28.8177	18.5192	558.958	11.2319	24.3202	922.091	1250.38	81.6446	93.4272	203.161	35.4607	17.4673	35.5431	30.1198	749.105	84.5582	70.8389	40.415	30.6228	527.495	12.144	10.9688	4.0478	6.10214	17.072	4.26759	6.17359
LUX	0.451993	0.414243	0.0376007	0.0130285	0.303199	6.21369	0.361256	0.0189615	2.35888	0.247654	15.8171	0.400565	0.077507	0.196413	0.524939	2.61136	0.0357024	7.50113	0.0298023	0.0113909	4.58809	0.524228	0.389445	0.102674	0.630051	0.0717163	0.0887538	5.47517	4.72971	0.556398	1.34154	0.46935	0.272017	0.197138	0.514412	0.296011	0.57626	0.488387	0.660235	0.75623	0.13036	0.282075	0.100229	0.129494	0.00774642	0.0141875	0.0182968	0.0135139	0.00686471
LVA	217.795	199.671	19.553	40.3954	110.056	2383.61	1029.28	477.804	506.967	801.145	896.133	93.4679	24.3061	112.672	690.808	544.887	540.751	19.8187	15293.6	7.88642	399.716	594.477	83.1784	29.7942	2384.86	22.9325	40.8909	6211.18	1932.5	730.051	222.254	146.491	139.116	41.0897	83.3376	58.17	526.352	98.3402	141.499	96.7115	65.8368	800.056	26.7636	26.502	11.2151	16.3733	11.9309	5.98654	8.05765
MLT	0	0	0	0	0	0	0	0	0	0	0	0	0	0	0	0	0	0	0	0	0	0	0	0	0	0	0	0	0	0	0	0	0	0	0	0	0	0	0	0	0	0	0	0	0	0	0	0	0
NLD	9.19613	38.9484	0.73436	0.238453	6.24216	98.4745	9.35241	0.294034	35.7163	5.44063	90.6074	11.5661	1.59189	5.32305	10.0888	50.1253	0.793944	2.24373	0.695118	0.211182	532.698	13.1338	7.89034	1.95491	15.1911	1.36312	2.27025	93.9647	77.8892	12.6371	18.7651	7.31349	5.96552	3.65116	10.8875	5.18839	13.1135	10.232	10.4384	13.2943	4.62028	11.4646	1.78238	2.03817	0.117745	0.164085	0.271104	0.313207	0.0171271
POL	820.616	720.123	127.237	11.2796	1215.05	9141.93	933.04	103.794	1425.33	290.193	3153.81	249.716	221.426	908.373	243.778	2400.51	467.385	48.0075	243.481	6.23138	747.389	36892.1	164.684	586.497	1532.6	148.859	654.18	2904.59	2312.25	355.714	719.411	452.764	194.497	117.014	258.549	195.895	3567.18	194.198	486.853	581.326	205.819	649.904	55.4546	71.644	4.85273	9.61614	65.3512	8.66175	2.04718
PRT	94.8691	148.913	11.1751	3.84033	38.3946	784.197	52.9203	2.82607	2727.02	41.9601	1577.67	122.59	19.3916	38.1224	61.6518	811.869	6.21192	7.3767	3.42798	6.10578	166.507	85.5272	10416	21.4618	87.8445	12.6586	13.2725	773.104	1366.08	125.03	180.3	93.2705	52.1308	55.395	56.6738	73.8465	80.7903	179.445	117.821	167.632	41.6791	43.7695	11.8512	24.868	2.07397	1.36385	2.22094	2.02717	0.355593
ROU	135.909	54.9698	35.3119	1.934	40.522	612.112	29.9692	2.11431	354.544	16.6085	473.457	206.64	20.1732	167.864	19.8753	985.153	2.54896	1.89692	2.26623	1.82355	50.4449	64.9983	26.5934	11466	67.6287	23.3305	16.6432	238.869	371.227	254.397	216.93	39.122	25.9643	11.7845	51.8193	17.0848	61.2563	23.014	45.2717	457.494	31.3839	37.3268	9.53327	7.0998	0.647759	1.73926	3.52332	1.59274	0.353765
SWE	1733.13	2094.31	105.54	86.584	919.927	12958.3	7164.19	194.19	6389.27	3137.24	8953.67	1386.27	239.078	937.745	2216.03	8572.77	243.573	145.132	314.667	25.8917	4090.83	2430.91	1007.95	344.7	93358	202.512	338.161	19062.8	13635	4815.14	4391.93	1128.97	996.016	585.302	1414.33	728.137	2471.06	1323.75	1727.56	1979.9	1126.08	11606.2	445.005	487.994	11.5508	18.7112	40.1418	51.3997	3.43859
SVN	56.6235	9.11544	3.90013	0.631742	13.808	153.855	9.29277	0.713795	32.3707	5.93595	58.0883	14.5363	77.2524	17.2195	5.48935	169.709	1.15293	0.965886	0.946593	0.333977	9.00358	14.6864	6.26441	5.65743	13.4905	782.908	11.9849	42.5261	51.3047	8.39125	11.4222	5.92407	4.53219	3.08834	7.21886	4.43868	19.4857	7.14835	12.9625	15.2314	4.33319	6.35605	2.05634	1.91888	0.494516	0.238979	0.49424	0.181383	0.080507
SVK	1111.08	204.95	46.9399	16.7356	1373.44	2556.76	211.147	10.2601	626.669	83.0844	1126.81	219.494	119.465	1023.09	100.204	1983.15	35.3128	16.8316	24.9373	3.39531	203.965	940.802	102.399	180.714	326.161	238.337	9496.3	752.453	1043.4	138.578	176.698	115.876	65.8917	49.0669	74.1419	60.063	396.472	85.1032	152.42	174.696	63.789	156.448	25.787	28.9616	3.61243	11.9626	8.29027	3.46374	2.64709
GBR	16.979	65.6073	2.18743	1.6241	12.8643	193.481	23.4352	1.40574	115.638	19.9897	254.321	20.8241	3.57201	9.90548	368.877	122.745	1.8702	3.56074	1.92018	5.00437	61.9539	30.1791	21.1555	7.15975	42.6637	2.70598	4.71565	5241.59	464.374	56.9785	77.7812	34.0809	31.3563	12.5487	57.135	18.365	48.0795	40.9277	35.6164	30.1989	19.9309	29.6689	7.15467	11.29	0.501191	0.758365	1.67754	2.04826	0.118573
USA	593.882	1636.24	71.9813	21.9559	334.256	8000.32	462.674	31.4128	3905.55	382.529	5425.68	624.295	97.2304	228.652	1239.89	5965.24	68.395	77.7426	38.5532	27.083	2219.35	772.475	595.663	186.967	872.412	105.555	99.2811	10886.4	1.50888e+06	15997	14256.3	38118.7	5570.85	2655.97	3052.72	28070.6	1365.78	3722.57	1359.65	1907.04	3634.35	586.629	898.507	397.215	35.6562	30.2954	52.4723	107.071	3.24618
JPN	9.72812	23.9628	1.15284	0.271716	6.08478	133.146	7.96117	0.800497	48.5147	10.512	76.3508	9.67825	1.92048	8.08768	12.735	58.882	0.669674	0.586665	0.538485	0.38382	31.0643	10.3354	5.40865	2.6762	16.94	1.71048	2.27307	136.542	1160.75	30331.8	712.201	64.2051	193	23.3585	52.0582	54.65	31.4977	85.0437	15.3413	19.7179	203.531	11.8791	36.1272	4.31101	0.902002	0.241457	0.896084	5.24411	0.24394
CHN	255.7	709.482	48.5803	7.52466	179.523	3683.68	299.258	19.7246	1685.72	255.599	2414.33	375.664	86.3161	145.54	387.292	2251.55	27.4791	17.6917	22.5623	13.0232	901.368	373.24	158.577	105.048	464.075	51.4411	62.1241	4257.1	33327	10137.4	232054	2404.94	3058.09	551.269	1527.43	1034.73	1251.52	2107.63	366.505	771.945	306.574	339.098	490.591	173.964	25.1792	8.20509	66.2576	246.241	1.51158
CAN	561.111	1169.68	63.4425	24.4603	256.756	5213.89	431.546	26.2352	2845.15	361.909	4758.02	786.887	83.4045	197.209	1111.21	4841.25	61.0576	65.3421	36.244	23.3017	1522.39	463.563	404.372	164.229	936.52	77.8788	81.0952	9981.19	446913	25926.7	10569.9	475376	4432.99	2692.04	5003.12	7780.56	1138.57	2981.95	1032.18	2093.98	2626.1	727.041	805.592	315.542	22.9115	26.8544	37.7769	114.876	2.99215
KOR	5.64082	7.48935	0.79263	0.12164	2.38715	49.2925	4.19709	0.29611	22.6597	5.7637	30.7072	7.36198	0.967656	2.70911	6.42995	30.9123	0.452451	0.307427	0.406975	0.374255	9.92568	5.2829	2.802	1.70849	6.58303	0.787431	1.75597	48.9482	410.733	142.276	308.267	27.2837	5672.64	10.5757	51.1113	17.8873	26.0505	56.61	5.80235	15.7362	92.2287	5.81156	16.2371	3.2192	0.614077	0.155289	0.65602	5.57117	0.0399648
BRA	1736.39	8237.33	1480.2	42.876	1166.42	26212.3	1585.49	151.143	13977.3	1867.69	20858.1	2408.34	804.297	612.281	2150.72	19470.9	367.422	257.917	190.148	105.43	12200.7	2757.31	3286.87	2031.89	4129.37	1254.5	459.915	23636.9	105293	27924	38119.5	8305.08	9031.51	2.64495e+06	15810.3	10018.3	48192.9	4154.76	2837.61	4122.18	11471.5	2367.08	2753.6	1493.56	371.952	314.331	571.241	3736.64	11.4453
IND	13.8408	33.1624	2.49083	0.958021	6.78283	114.569	13.8961	0.899313	67.4335	8.97748	89.6663	18.8357	2.77916	5.96935	13.6444	89.9713	1.62056	3.26411	1.482	0.866742	38.2708	15.1862	13.1158	4.1591	19.6371	3.52553	2.95033	178.84	570.526	138.908	139.591	52.3732	50.5932	23.9505	23555.9	31.5606	50.9407	51.1593	21.7117	32.425	39.9688	15.899	32.2371	21.2584	5.24809	1.35111	2.75169	86.0002	6.34756
MEX	13.7734	41.1135	1.77771	0.209278	14.2157	193.882	13.5844	0.719231	133.858	8.01327	113.734	16.0685	2.67886	5.05298	15.0822	78.1787	1.16389	1.05694	1.4279	0.340979	44.8821	14.9537	15.256	3.14876	16.9114	2.38885	3.23554	226.039	19516.6	639.835	172.69	567.265	93.0406	65.5851	29.4994	164999	30.249	92.2343	25.7317	17.4381	50.8878	14.5479	9.0547	4.83027	0.573644	0.677104	0.653958	1.48045	0.118816
RUS	2252.65	2840.4	642.914	377.144	1597.8	16043.6	2400.55	3026.15	4720.71	17607.5	8674.86	2520.3	409.579	1786.12	7033.46	9984.5	2324.43	270.599	3341.49	101.33	3820.63	4632.99	690.709	885.911	4176.26	293.634	997.636	15960.6	31553.9	26483.5	64485.8	2455.76	7601.96	1150.04	8815.28	1172.44	338350	1800.15	1870.62	11829.2	12681.9	1882.27	1213.99	523.046	201.448	859.609	4341.87	208.837	40.698
AUS	47.3605	101.613	9.61815	2.82786	20.1652	357.179	50.5906	3.25295	181.387	49.1481	275.533	45.1601	7.58611	17.7302	69.353	256.119	4.38918	8.72612	3.19343	2.17711	143.486	41.9011	40.3185	12.5808	81.4827	8.68019	9.14712	882.297	2739.62	4354.94	1768.79	293.207	877.433	66.5872	431.457	130.434	115.092	60336.7	77.5509	68.6037	396.259	60.8242	313.795	95.3181	3.35981	3.4996	4.19005	38.469	1.87015
CHE	29.5135	15.5158	1.47753	0.226143	7.24949	148.386	7.15386	0.317446	32.1175	4.25505	100.981	9.15945	2.41473	6.39611	7.95874	88.6436	0.817932	0.998044	0.428706	0.185923	15.7989	9.74427	4.87607	5.24893	8.88568	2.66285	2.59619	65.7707	112.906	20.1579	20.0432	8.59348	7.37122	5.088	10.6049	6.30387	12.2777	7.6781	1236.17	18.0211	4.81361	5.28608	1.98976	3.34498	0.13159	0.807324	0.482578	0.605592	0.0283742
TUR	21.1301	30.7376	39.8231	11.6405	9.48717	214.247	16.8411	1.33986	88.645	9.71706	118.837	60.9947	5.77527	11.2658	18.9764	155.539	3.31824	2.48678	2.53332	3.24465	40.0188	24.7653	14.2175	54.4982	25.8822	6.00324	4.57555	185.102	256.776	36.1343	53.3319	26.7898	20.1968	9.28147	26.2257	15.0271	86.6722	20.0852	19.6688	14615.5	12.0827	14.999	6.52291	15.149	1.8255	5.76494	39.2861	1.13242	0.234734
TWN	1.05949	2.99025	0.298639	0.113165	0.842008	13.7725	1.33071	0.144114	6.85432	1.09982	9.49908	1.91262	0.376806	0.663027	1.75857	8.88398	0.228627	0.126414	0.155781	0.0981012	3.66638	1.81241	0.866626	0.5112	1.90273	0.262774	0.325469	17.9641	142.16	57.826	5.64547	10.8085	16.2443	2.09499	6.06669	4.77496	6.15108	10.8482	1.58428	3.64607	480.775	1.40689	3.52537	1.26004	0.0316249	0.0375215	0.0575626	0.649941	0.0135821
NOR	68.401	154.229	6.22877	5.48892	50.2952	735.097	383.318	21.2394	284.269	136.302	491.887	87.7081	12.1759	32.4315	155.546	322.747	19.1438	12.7718	10.3336	2.8597	210.199	145.146	63.6258	17.8205	1298.99	16.6397	17.4478	1493.44	1217.24	223.887	292.306	90.2507	97.0516	119.344	79.5966	62.8429	116.433	106.099	93.8625	87.892	76.4323	14305.9	29.2692	23.5227	0.862586	1.15434	3.89923	3.25604	0.37396
IDN	545.733	2095.05	144.465	26.7527	441.438	8159.42	614.657	54.5789	3311.86	417.615	4670.84	782.551	108.399	241.695	604.531	4860.63	63.7066	128.478	58.4766	28.6776	3554.32	929.48	511.073	195.822	762.586	299.471	209.217	7324.54	47351.7	28829.6	26035	3118.06	7565.67	1847.1	20620.9	1517.19	2090.01	5938.34	690.109	2583.75	8182.68	711.332	780459	643.305	112.499	23.1882	41.1349	3047.3	8.06328
ZAF	161.058	287.812	13.4208	3.52895	56.5975	1102.52	78.6821	5.08839	821.432	51.6731	674.262	82.5711	21.0171	38.6564	215.633	738.838	9.29587	12.5876	7.65338	3.83285	304.069	105.177	116.076	23.1435	133.489	17.8878	19.9384	2262.28	3438.22	3609.33	966.192	268.104	285.729	185.922	930.534	157.029	127.027	932.349	146.245	203.115	246.963	87.9196	275.52	72402	6.44392	3.61388	8.42149	17.3346	1.86385
AFG	0.247469	3.26093	0.0392362	0.0128034	0.155599	2.54112	1.00695	0.0459098	0.810792	0.390442	1.30411	0.170093	0.0399086	0.128515	0.200917	1.30274	0.039969	0.10912	0.0321492	0.0196547	0.931683	0.524672	0.106258	0.0955796	0.225829	0.0543116	0.0525856	3.07781	6.2437	6.11991	2.65548	0.321885	2.0394	0.52429	34.6288	0.426179	1.08285	1.36039	0.221257	1.00363	0.725795	0.157139	1.16057	0.192967	68.5275	0.00784229	0.0152132	0.2312	0.00691269
ARM	0.228236	0.643866	0.038252	0.0131268	0.0906282	0.816823	0.200906	0.0492649	0.574649	0.0899884	0.59846	0.118867	0.030904	0.107781	0.171067	0.566041	0.0996081	0.141995	0.0479705	0.0124268	0.746377	0.154682	0.0670393	0.0795922	0.119247	0.042358	0.0448499	1.07812	2.95834	2.19762	0.653307	0.197615	2.28343	0.326368	0.544686	0.320774	7.55488	1.07469	0.206236	0.261962	0.489159	0.0878373	1.09669	0.197433	0.0150225	43.3413	0.0234998	0.0120933	0.00522695
AZE	0.711148	0.783007	0.0540841	0.0193469	0.283547	7.01256	0.224427	0.0594938	0.913695	0.100726	3.03839	0.256704	0.0458269	0.182735	0.170989	8.87178	0.221751	0.380252	0.0954977	0.021492	1.13207	0.811473	0.18974	0.147485	0.186264	0.0803481	0.0953803	1.47055	9.28478	1.63855	0.983096	0.534308	1.11181	0.294152	0.46356	0.4701	17.7149	0.684095	0.258563	5.43771	0.382807	0.119432	0.535394	0.151513	0.0462541	0.0208388	78.4464	0.0125763	0.00320747
BGD	2.44989	8.91776	0.158128	0.0461125	0.40001	11.7487	2.24161	0.0771693	6.16641	2.06644	6.17841	0.870039	0.134034	0.419157	1.01468	11.9518	0.0732827	0.398281	0.876214	0.0349538	4.50352	0.845277	0.641451	0.211797	2.76031	0.149385	0.34491	65.614	34.5161	5.86595	10.9863	4.31957	3.37627	0.877396	57.3259	0.844958	2.07021	2.00003	2.35307	1.07095	0.846117	2.78912	1.15659	0.600804	0.0871856	0.0195722	0.0333198	1266.89	0.0634389
BTN	2.2106	1.95238	0.417756	0.0700094	0.32509	3.28947	1.82551	0.256024	4.47915	0.650475	4.47209	0.484427	0.178753	0.811854	1.32284	3.12724	0.214739	0.495935	0.159675	0.0840592	2.54139	0.739443	0.369651	0.341	0.977689	0.288836	0.375521	6.17235	21.8223	22.5908	3.404	2.22901	9.23694	1.72095	154.355	1.93459	4.61802	4.14919	0.552039	1.60902	1.5156	0.492027	4.13615	0.767729	0.0693135	0.0357351	0.0568202	3.38667	88.619
BRN	3.98532	3.81784	0.73702	0.133669	0.656408	8.50107	3.43455	0.540959	5.8631	0.797534	8.22216	1.16849	0.303102	1.89479	1.5975	5.95796	0.383356	0.706653	0.333615	0.151943	6.05115	2.19576	0.592117	0.739925	1.38452	0.609139	0.792511	19.6673	101.134	170.07	50.5938	4.88272	78.845	3.06977	6.52003	4.78504	8.26419	27.8673	2.41582	2.74436	9.72871	0.919748	8.79251	1.58101	0.0711853	0.0496663	0.104697	0.383345	0.0316137
KHM	336.806	305.373	33.4577	4.78702	29.6421	638.542	230.833	14.1421	264.985	46.2907	808.534	54.3668	11.0795	86.8208	127.126	242.193	17.273	18.1538	15.6772	4.52709	217.974	60.9375	34.5043	14.5209	195.666	37.8782	16.7684	943.562	4424.71	527.945	1716.09	199.67	754.005	56.7375	172.106	105.51	396.396	220.356	161.638	106.183	131.341	265.396	173.63	58.6378	1.82897	1.58357	2.83368	5.37231	0.943011
PRK	17.8753	21.7836	5.06193	0.47983	4.63514	69.3541	19.4848	2.4777	60.8215	4.68452	64.2314	7.15982	2.67149	7.10963	9.74284	43.9287	1.84637	4.70958	1.41339	0.63897	39.122	10.5527	4.04076	6.923	10.1209	3.53979	2.28451	89.5294	414.526	1114.31	3142.8	28.4148	427.289	122.193	43.6309	87.7276	54.4152	66.3451	11.0127	15.8692	24.4716	6.38716	53.3563	11.1256	0.477546	0.280787	1.03854	3.09279	0.184143
FJI	1.75808	5.19168	0.283952	0.134792	1.28178	9.56496	3.11606	0.577698	6.99576	0.819786	9.91289	1.08344	0.281006	1.12809	1.90407	6.71797	0.387513	1.6846	0.292455	0.132587	11.9933	1.52365	1.26723	1.16282	1.45908	0.569192	0.4232	39.887	262.325	247.923	19.1532	5.83256	29.4283	4.92266	8.09384	5.78496	4.48724	112.705	1.32875	2.23659	10.3356	1.03931	19.338	2.42592	0.0770994	0.0613067	0.0974505	0.432246	0.0550191
PYF	0	0	0	0	0	0	0	0	0	0	0	0	0	0	0	0	0	0	0	0	0	0	0	0	0	0	0	0	0	0	0	0	0	0	0	0	0	0	0	0	0	0	0	0	0	0	0	0	0
GEO	0.825471	1.63098	0.262456	0.104003	0.872619	7.27018	1.4449	0.342736	3.64321	0.302457	4.63622	1.83849	0.123714	0.407424	0.648725	5.35025	0.388168	0.499703	0.142681	0.0603889	3.99362	0.780962	0.452137	0.484446	0.565813	0.153408	0.32295	9.35357	12.6676	23.82	3.15481	0.94084	14.3107	1.50937	2.55672	1.41126	9.652	5.6772	0.54852	27.9279	2.22283	0.355579	5.08947	0.714517	0.081757	0.647617	0.319381	0.0553897	0.0214072
HKG	0	0	0	0	0	0	0	0	0	0	0	0	0	0	0	0	0	0	0	0	0	0	0	0	0	0	0	0	0	0	0	0	0	0	0	0	0	0	0	0	0	0	0	0	0	0	0	0	0
KAZ	13.8587	9.5453	1.18995	0.420113	13.0982	83.0348	2.84769	1.33656	26.8941	4.01942	46.133	8.5772	2.09005	4.51743	2.73497	47.1276	1.60608	2.43009	0.91355	0.322738	19.4576	9.84492	3.93854	11.2214	4.59964	1.13257	3.33662	35.5815	60.8162	25.4292	85.4824	5.22168	13.9744	6.54519	11.4659	5.68743	93.5412	22.2915	5.33725	44.3727	14.2601	2.55605	14.5485	2.41086	1.14918	0.214127	1.1858	0.341808	0.0531061
KGZ	0.144331	0.269999	0.0940319	0.00817725	0.107603	0.758947	0.186163	0.0394216	0.544607	0.0577525	0.596415	0.0645073	0.0225958	0.0809506	0.115515	0.343424	0.0267733	0.0868756	0.105068	0.00833691	0.729221	0.138299	0.0521949	0.0789891	0.0927876	0.0287207	0.0313311	1.42909	1.73675	5.23194	0.908995	0.134162	2.18743	0.332598	0.526525	0.302233	0.966007	1.27675	0.075727	0.785716	0.524601	0.0578497	0.974703	0.135863	0.0307007	0.00513777	0.0120342	0.00998897	0.0025649
LAO	224.322	208.421	44.673	4.57664	23.2563	334.179	167.607	14.3245	256.431	50.0242	375.046	32.5899	8.20962	90.509	53.3734	273.565	15.1579	17.7526	98.0885	4.01654	165.856	241.888	75.3873	16.7266	52.9547	29.2738	30.0924	355.419	765.188	424.843	942.208	580.968	366.028	55.0995	102.347	73.1481	363.565	145.891	192.093	85.0098	154.247	124.122	131.808	40.8703	1.54947	1.46163	2.64292	3.50029	0.936579
MAC	0	0	0	0	0	0	0	0	0	0	0	0	0	0	0	0	0	0	0	0	0	0	0	0	0	0	0	0	0	0	0	0	0	0	0	0	0	0	0	0	0	0	0	0	0	0	0	0	0
MYS	922.722	2542.65	122.875	78.4267	559.258	8060.09	901.625	212.781	3682.54	774.807	6700.52	854.997	178.189	388.186	1320.44	4906.88	171.582	290.216	52.939	70.1849	6086.52	817.779	640.549	413.018	1221.63	127.702	193.991	15262.5	34852.4	32738.7	27399.3	3965.3	10295.9	1800.42	9777	1896.55	2619.8	6226.17	1235.87	2404.23	3660.46	986.041	12232.1	2647.11	60.8857	20.3049	43.4964	310.984	4.3053
MDV	0.0235607	0.0120769	0.00323322	0.000656176	0.00157939	0.0352766	0.0197163	0.00165861	0.0251239	0.00385935	0.0325645	0.00529952	0.00156205	0.0114817	0.00844313	0.0291192	0.00221092	0.00247777	0.00162723	0.000451162	0.01254	0.00641231	0.00314652	0.002871	0.00583796	0.00304484	0.00210898	0.088681	0.129761	0.162429	0.0167204	0.0173058	0.0358697	0.00932772	0.0123324	0.011255	0.042696	0.0185294	0.00665818	0.00897121	0.0102892	0.00291315	0.0122726	0.00457651	0.000250564	0.000217085	0.000302747	0.000367793	0.000178616
MNG	1.08626	2.67847	0.302261	0.0819636	0.752185	8.54425	1.75989	0.320499	4.70737	0.584811	5.94736	0.746751	0.243999	1.09835	1.19036	15.0125	0.194378	0.653361	0.150274	0.0805992	4.99139	1.6715	0.482189	0.889312	1.02914	0.219242	0.62366	22.9096	71.2123	90.1093	301.462	2.98795	31.0114	2.73911	6.14798	2.9348	10.8281	9.11809	1.93204	1.79886	4.88028	0.752311	8.35167	1.17856	0.051955	0.0350245	0.110656	0.338766	0.0233751
MMR	54.7612	68.3949	6.82468	2.12038	12.3897	204.731	37.1783	4.1616	84.6602	16.0831	133.499	18.5825	7.63844	77.3784	21.7476	119.936	2.82477	5.66533	2.93476	2.08917	78.5901	55.302	13.7785	26.273	27.6933	5.75248	23.8062	669.888	721.768	1478.04	1973.18	124.188	395.964	31.1682	7087.24	41.5081	64.9178	309.189	40.2346	39.2029	135.276	20.5498	249.026	25.7909	1.60755	0.63759	1.32966	124.387	1.26831
NPL	3.2947	3.82536	0.370372	0.0818919	0.811497	16.1097	3.00411	0.177631	6.07001	0.717601	12.2686	1.58388	0.509748	1.07217	1.37077	8.35378	0.216449	1.01146	0.198655	0.120056	3.7213	1.1403	4.14595	0.416009	1.49029	0.514807	0.264421	17.3422	49.2664	24.0464	18.8833	3.86296	7.31922	2.55337	628.897	4.82534	5.36592	5.27464	4.53724	3.2905	2.72531	1.02597	2.94291	1.27369	0.172515	0.0508835	0.0927241	2.41851	0.521958
NCL	0.961272	1.66237	0.150945	0.0738336	0.270104	3.87532	0.822305	0.116356	4.21009	0.803952	13.044	0.374193	0.121729	0.614975	1.67977	3.9589	0.107396	0.19372	0.0854391	0.0530967	1.43677	0.701455	0.375202	0.286718	0.591568	0.164916	0.281846	4.36925	17.7865	49.5525	10.05	1.53436	9.43143	0.909237	2.33446	1.23443	2.07195	11.9112	1.31786	0.883912	3.65276	0.330991	2.07442	0.553624	0.0197145	0.0168261	0.0338606	0.0848432	0.00856956
NZL	58.3353	464.259	6.39556	6.77423	25.5577	609.99	75.365	6.41029	295.585	42.6762	395.693	40.5133	8.7503	23.3239	69.4981	366.375	5.93072	16.949	4.58422	2.88582	411.105	44.2216	33.68	16.3543	54.2419	7.72519	9.97711	1549.99	4498.1	4920.45	3063.07	265.891	2565.21	82.0558	325.437	253.879	144.013	5635.53	89.385	73.0046	509.662	46.2646	774.317	126.393	2.49956	1.57234	3.86629	12.8066	0.641277
PAK	0.511312	1.49063	0.0458149	0.0625408	0.260702	5.81581	0.632421	0.0393562	2.61891	0.217594	3.35585	0.753762	0.0935458	0.182489	0.473256	3.83659	0.044881	0.139169	0.0309347	0.0282933	2.43108	0.662665	0.492338	0.128397	0.640411	0.0582005	0.100584	17.8618	22.7501	4.36856	5.4442	1.88191	12.5567	0.388573	10.0572	0.656326	0.718488	2.61687	1.08972	1.91283	0.699993	0.76667	1.19521	1.06963	0.38977	0.0329026	0.0496989	0.105612	0.00511505
PNG	26.6933	194.8	4.33028	0.777232	7.34608	769.11	25.6632	1.19421	78.2763	8.35491	127.386	14.7805	2.34384	8.38372	40.2832	107.11	1.63817	2.67626	1.25746	0.943201	74.5841	15.5223	14.8809	5.16246	37.2291	2.82798	3.11529	1676.5	1018.98	3855.23	388.939	52.3982	739.452	13.9481	50.8494	26.4366	45.7831	478.463	16.0317	21.2262	42.0198	10.7478	159.632	14.4047	0.481593	0.389753	0.99778	4.40805	0.112895
PHL	37.7219	118.878	3.95056	2.45617	16.6671	435.796	31.4881	1.85563	147.196	27.8973	204.763	36.057	5.45407	13.2427	39.05	227.36	3.53657	3.55511	2.46037	2.01637	192.579	30.0467	13.5767	7.85944	41.7686	6.53513	9.65683	686.379	3617.73	3318.32	853.992	340.508	1111.22	82.139	94.2635	88.6863	75.0857	148.176	92.2838	40.9292	105.021	46.2988	258.349	59.427	2.21766	0.851896	1.28857	6.1013	0.205369
WSM	0	0	0	0	0	0	0	0	0	0	0	0	0	0	0	0	0	0	0	0	0	0	0	0	0	0	0	0	0	0	0	0	0	0	0	0	0	0	0	0	0	0	0	0	0	0	0	0	0
SGP	0.253907	0.373677	0.0260008	0.015366	0.133239	2.41681	0.318906	0.0109926	0.819805	0.213927	1.81067	0.145106	0.0335512	0.15478	0.658687	0.965005	0.0170031	0.101066	0.0229487	0.0238163	1.09042	0.188824	0.0965832	0.0338076	0.253454	0.0323805	0.0529789	2.78314	6.51889	3.24974	2.98382	0.820441	1.81861	0.437612	1.52278	0.396159	0.270199	2.05952	0.4603	0.167018	0.436951	0.322709	2.25883	0.629315	0.0105118	0.00312364	0.00997412	0.118478	0.00284387
LKA	10.7192	44.9192	2.1757	1.4413	12.6529	119.038	10.8781	2.98387	47.9942	37.8469	92.0807	11.9433	1.81235	6.57416	17.464	86.2512	4.89687	5.30706	66.7823	0.41042	56.7119	19.637	7.13758	2.71532	12.5642	1.79776	4.09575	196.568	344.632	319.476	89.771	41.4833	83.9847	33.2122	413.111	56.2535	324.973	36.5825	19.3887	160.381	10.2291	8.60536	33.2989	10.5326	0.899896	0.693575	2.40881	2.2787	0.0570512
TJK	0.0468612	0.03163	0.0275964	0.00075321	0.0200859	0.045899	0.0318334	0.0039195	0.0385966	0.00536683	0.0698839	0.00966016	0.00590185	0.0180215	0.00866911	0.0492377	0.00400178	0.00440519	0.00311726	0.000966874	0.0231353	0.0176466	0.00621102	0.00778412	0.00850133	0.00701427	0.0198682	0.0596497	0.128159	0.142557	0.0517484	0.010604	0.182052	0.0190878	0.0260242	0.0172241	1.51978	0.0447728	0.00827446	0.0346753	0.02431	0.0491688	0.0423841	0.00854227	0.000423785	0.000437115	0.00137132	0.000585515	0.000169719
THA	200.152	446.973	23.2091	34.1613	128.777	1859.29	188.357	24.9143	611.558	165.851	1019.3	132.134	37.4838	80.6413	155.566	893.502	20.0073	95.3059	16.4287	13.752	893.512	159.379	138.858	67.0961	347.859	22.491	47.8657	2463.69	8509.88	6812.99	5332.32	1055.14	1152.17	295.692	842.88	322.166	460.482	979.702	558.747	330.391	406.637	329.928	1196.23	458.22	4.85183	2.73157	5.63324	39.3278	0.90935
TKM	0.0193886	0.0127183	0.00432398	0.000465606	0.0064042	0.0602792	0.0129487	0.00174481	0.0204547	0.00288424	0.0364257	0.00724996	0.00157568	0.00678821	0.00418895	0.0572143	0.0016941	0.00180336	0.00306999	0.000386795	0.0127899	0.0210959	0.00198456	0.00353306	0.0043266	0.00241142	0.00241364	0.0364104	0.174841	0.0785432	0.11621	0.02093	0.0872207	0.00718585	0.039765	0.0108201	0.116567	0.0182554	0.0075822	0.108198	0.0153716	0.00230359	0.0178025	0.0038856	0.0135185	0.000790855	0.00331439	0.000424015	7.63E-05
USR	0	0	0	0	0	0	0	0	0	0	0	0	0	0	0	0	0	0	0	0	0	0	0	0	0	0	0	0	0	0	0	0	0	0	0	0	0	0	0	0	0	0	0	0	0	0	0	0	0
UZB	0.0147697	0.0242511	0.0118295	0.000959607	0.0117997	0.0589956	0.00608938	0.0116289	0.0314051	0.00469763	0.0895206	0.010507	0.00270507	0.00858081	0.00684371	0.116196	0.0102177	0.00357747	0.00528412	0.000697353	0.0211746	0.0608026	0.0170092	0.0073888	0.00638251	0.00362593	0.00602005	0.0463582	0.0925402	0.0504303	0.0363812	0.0179483	0.144511	0.01529	0.0246571	0.0107162	1.09454	0.0306343	0.0106754	0.0796912	0.0186755	0.00370379	0.0205037	0.00477289	0.00127371	0.000709102	0.00154433	0.000514146	0.000157068
VUT	0.619711	2.41188	0.081572	0.015869	0.0759644	2.36765	0.545214	0.0493838	0.783286	0.0981158	1.57179	0.10342	0.0302343	0.2251	0.193018	0.623616	0.0544391	0.0882251	0.0412347	0.013589	0.711621	0.177709	0.0796953	0.0747736	0.190825	0.0861464	0.037298	1.669	3.58298	11.9185	1.7751	0.448758	4.69099	0.472175	1.34375	0.367336	1.03255	3.00706	0.187626	0.272186	0.418547	0.110124	0.902863	0.204347	0.00635284	0.00539639	0.00841459	0.0147849	0.00410236
VNM	294.607	692.177	35.1241	10.2035	350.534	2232.05	253.947	32.3786	1407.8	143.721	1455.58	148.892	46.7107	152.923	132.557	1550.57	32.9441	29.9345	145.531	7.04389	881.329	568.378	153.017	120.648	277.466	55.2204	156.375	2384.53	5913.2	5031.88	6512.83	750.906	2670.16	243.985	1061.3	313.018	1530.67	1155.01	428.691	242.397	888.02	286.499	541.439	183.74	3.7599	5.01642	7.89456	21.6945	1.45894
ATG	0.213891	0.601403	0.0194527	0.00522014	0.188308	2.32092	0.173549	0.0710995	0.670691	0.0585415	3.52649	0.144474	0.0175843	0.256604	0.107353	0.818679	0.0289917	0.028396	0.0304223	0.00587216	0.147689	0.186077	0.046313	0.112186	0.386955	0.0361729	0.108828	0.65007	4.53713	0.276878	0.507784	0.322087	0.796639	0.24386	0.134933	0.487345	0.627104	0.175634	0.340276	0.14973	0.106695	0.0768236	0.0730836	0.13306	0.011334	0.0104621	0.014422	0.010833	0.0149778
ARG	373.002	1520.12	181.052	39.784	219.429	6442.54	392.407	34.4322	5713.18	178.862	3275.35	812.179	236.892	177.147	328.5	6688.28	109.014	82.4964	141.844	24.4207	3971.15	1186.39	963.947	200.673	410.077	103.33	80.7027	3772.46	15657	3385.36	15425.1	1635.71	1901.66	20189	7924.5	2308.01	8014.54	1174.73	496.471	1283.21	366.008	330.973	1575.13	2451.91	31.7489	19.1641	38.65	1856.76	6.12777
ABW	0	0	0	0	0	0	0	0	0	0	0	0	0	0	0	0	0	0	0	0	0	0	0	0	0	0	0	0	0	0	0	0	0	0	0	0	0	0	0	0	0	0	0	0	0	0	0	0	0
BHS	0.786967	1.09202	0.102961	0.0356516	0.288131	8.80715	0.684944	0.074822	14.9775	0.176849	8.05998	0.212597	0.188907	0.300279	0.441477	3.38444	0.072209	0.0773528	0.122071	0.0190404	0.39978	0.666025	0.320865	0.184923	0.298555	0.138994	0.121687	26.1213	36.5203	2.01364	1.79289	2.95187	1.68448	0.690907	0.391514	3.23226	2.11162	2.2329	7.67654	0.626374	0.401536	0.576335	0.154778	0.438489	0.024581	0.893736	0.0277551	0.0453345	0.0209869
BRB	0.0218103	0.0232587	0.00159879	0.00234239	0.00339243	0.132239	0.0124667	0.00108215	0.118809	0.00360773	0.160795	0.00466454	0.00294665	0.00690186	0.0154846	0.0617331	0.00184374	0.00188293	0.0015526	0.000406705	0.017271	0.0136343	0.00432069	0.00195432	0.00814311	0.135945	0.0023494	0.656414	0.685819	0.0204944	0.039665	0.0800621	0.0363597	0.031289	0.0102968	0.0320084	0.047926	0.0144229	0.00988084	0.0123316	0.0118828	0.00511215	0.00410392	0.00585071	0.000630688	0.000683198	0.000801236	0.000716375	0.000625093
BLZ	26.5557	41.2467	0.647406	0.426341	1.21018	47.9364	33.3199	0.436624	30.093	1.89132	39.7483	4.27165	0.60273	2.0868	41.6004	50.2842	0.778579	0.802905	0.651268	0.154194	13.2865	5.03408	16.3287	0.761267	4.36154	1.10183	0.902333	728.48	1507.68	174.105	23.4403	97.0903	18.7649	9.4851	5.86982	64.8504	13.3493	8.10662	8.06765	3.84411	8.09537	3.20714	2.85773	8.01422	0.408121	0.575078	0.338416	6.9887	0.262315
BMU	0	0	0	0	0	0	0	0	0	0	0	0	0	0	0	0	0	0	0	0	0	0	0	0	0	0	0	0	0	0	0	0	0	0	0	0	0	0	0	0	0	0	0	0	0	0	0	0	0
BOL	552.733	379.117	22.8811	3.34391	36.1468	2419.73	205.137	12.0788	1216.88	83.5627	1728.81	71.7132	19.6158	75.9339	88.9841	1564.15	18.9312	1688.83	20.701	3.88574	496.026	249.127	47.0188	18.761	91.7401	40.4918	14.3574	2367.86	11471.9	1270.26	1187.26	698.677	619.878	1761.15	412.062	786.957	1254.67	318.663	147.973	131.905	81.3685	144.421	46.6926	59.4478	7.56598	6.32011	8.93976	17.7122	5.95763
VGB	0.0231929	0.0266742	0.00194203	0.000312279	0.00207958	0.147124	0.0126912	0.00118829	0.0638709	0.00361539	0.110946	0.0033404	0.00174	0.00756776	0.0077511	0.102185	0.0020246	0.00143374	0.00155934	0.000385675	0.00685277	0.0144457	0.00199513	0.00267957	0.00598023	0.00268643	0.00108883	0.178523	0.427946	0.0136494	0.036721	0.0111744	0.0528214	0.0179014	0.00802294	0.032327	0.0570665	0.0149748	0.254759	0.0129465	0.00806542	0.00238971	0.0045413	0.0366937	0.000617092	0.146695	0.00791046	0.000637445	0.000596458
CYM	0.0314973	0.0407287	0.00235655	0.000529823	0.00246218	0.215979	0.020164	0.00170457	0.14936	0.00492389	0.160849	0.00657067	0.00157876	0.0122306	0.0112957	0.135526	0.00311551	0.00225691	0.00199796	0.000684401	0.00817125	0.0229437	0.00315818	0.00251973	0.00897911	0.00402793	0.00168858	0.0296203	0.645097	0.0296328	0.0589017	0.0211516	0.0647671	0.0192321	0.0120508	0.0494116	0.108512	0.0136442	0.0133446	0.0142685	0.0411913	0.420075	0.00590369	0.0126465	0.000908913	0.00563553	0.00104832	0.00098044	0.0010451
CHL	82.538	310.421	23.1637	3.07395	36.9654	958.52	290.859	8.13902	1894.9	82.87	876.56	81.5518	20.4502	32.3384	154.762	1332.54	9.53922	40.1004	10.4418	3.16109	647.067	97.5306	148.477	18.6467	160.849	17.3614	16.1756	1272.81	20637.2	4524.62	2508.6	1339.1	837.37	1071.48	423.767	3472.01	283.31	455.286	173.668	214.209	374.019	186.082	274.803	165.526	3.24688	3.83862	5.05815	19.4175	2.44176
COL	130.363	2085.25	19.487	1.96319	284.44	2609.51	469.594	10.2041	2869.97	171.371	926.33	101.628	63.8588	54.7604	202.602	1849.23	20.2869	11.0523	9.882	8.37079	517.825	119.877	321.292	38.1974	327.612	77.6219	40.691	2206.93	18699.3	2208.56	384.899	1175.69	321.762	456.643	71.6528	1128.93	711.513	232	237.194	72.967	107.407	281.533	44.2488	43.1092	6.5085	3.37517	5.72409	69.3851	0.782323
CRI	50.1438	548.671	3.56139	0.505194	105.281	634.849	9.30744	2.64476	168.309	39.6406	165.538	15.9384	2.98942	7.22302	65.8825	425.85	1.79719	30.7059	0.839618	2.24588	198.581	40.9376	97.2386	10.5092	132.398	5.43837	22.4913	471.9	4033.82	127.431	64.5148	196.979	30.34	9.16532	16.9579	349.478	76.3856	27.7239	77.7976	16.2445	9.75795	143.302	8.54508	4.79522	0.533566	0.979875	0.694044	0.719478	0.135596
CUB	5.91022	12.8595	0.747815	33.868	3.24139	62.5025	3.31791	9.73589	270.709	3.90568	137.522	3.42186	1.30889	1.44369	2.72199	27.5584	0.411568	0.447348	0.730631	0.374695	24.4818	6.96503	15.7517	9.01426	3.13459	1.29828	1.81034	50.1757	91.566	36.528	282.358	37.1409	10.0514	11.4236	6.76414	23.3391	75.8994	14.0635	35.2817	3.39995	2.5957	3.69844	1.19423	2.01999	0.168386	9.42747	0.434716	0.29013	0.0993985
ECU	162.76	190.371	34.5564	0.841083	111.273	1414.56	380.942	4.9953	866.685	40.2015	626.568	246.316	45.972	21.7319	14.142	1673.45	24.0596	99.4017	14.1174	3.25881	450.875	339.664	151.984	33.2395	56.8181	43.5634	28.5351	527.01	3235.82	537.736	172.69	154.694	111.216	93.9611	84.8956	224.148	895.989	54.1977	96.3847	115.934	29.1897	38.7653	51.7451	15.0411	3.2192	1.8173	8.08811	2.00179	0.43472
SLV	5.70558	32.5716	0.514479	0.114444	11.2635	134.591	3.59604	0.417905	195.295	7.71527	61.3687	3.04959	1.53711	1.46317	2.78922	34.0183	0.428272	0.399499	0.345232	0.093764	15.991	7.45911	9.25943	0.921927	7.05624	0.821251	1.55872	37.759	991.029	56.7725	27.1673	54.1213	11.7429	2.53949	3.39153	65.9637	35.1744	8.34731	6.75022	3.66826	3.51608	2.42734	1.80501	5.28066	0.197865	0.212158	0.440914	0.211127	0.0942009
GRL	0	0	0	0	0	0	0	0	0	0	0	0	0	0	0	0	0	0	0	0	0	0	0	0	0	0	0	0	0	0	0	0	0	0	0	0	0	0	0	0	0	0	0	0	0	0	0	0	0
GTM	71.6847	265.419	10.337	2.28522	31.2493	1416.56	41.6013	4.82383	1316.41	123.451	546.163	33.6268	11.0745	15.1856	36.004	616.987	8.58297	233.117	2.97365	1.24901	402.219	59.569	61.6742	12.5932	152.906	10.6566	16.4652	512.419	21733.8	834.717	720.448	1803.16	251.391	66.7596	130.521	2163.7	255.287	120.831	1003.52	75.2794	60.9696	137.247	113.815	65.1127	11.7492	11.9443	3.31158	122.649	0.961761
GUY	0.382937	1.07395	0.0765146	1.45092	0.0933558	3.63158	0.393062	0.0250164	1.5538	0.152398	5.20674	0.30052	0.0535124	0.224619	0.502801	1.92513	0.0459698	0.579379	0.030451	0.0127484	5.40025	0.454728	4.92587	0.1718	0.34073	0.117242	0.0520257	25.4699	56.7833	1.54569	2.55271	17.2863	1.84411	1.5423	0.591087	2.05721	0.992291	0.590596	0.400822	0.92803	2.06007	0.294436	0.22557	0.188865	0.0258052	0.0262099	0.0318738	0.281645	0.0180074
HTI	1.7718	3.21426	0.159451	0.0312523	0.205346	14.7433	1.30014	0.114674	13.0972	0.884428	15.0127	0.599224	0.124087	0.649428	0.8119	6.96643	0.189676	0.18882	0.116043	0.0352836	1.99115	1.46777	0.468812	0.196068	0.703044	0.250941	0.121845	3.69926	180.662	4.7675	5.88002	7.19089	4.96474	1.33484	0.959736	4.56696	5.55016	1.12746	1.76516	1.15721	1.53557	0.476809	0.425412	0.484982	0.0901316	0.0781136	0.0836649	0.0956573	0.0770142
HND	148.92	468.673	4.81775	1.55313	28.4234	1406.28	36.7766	2.05572	338.742	34.555	351.158	41.8543	8.22248	17.7084	48.6951	228.376	2.80576	2.7867	2.04458	0.523137	313.598	56.1349	54.3991	14.7579	81.5495	9.52685	15.2528	356.753	8895.79	321.541	151.492	578.977	144.064	30.735	13.489	448.167	221.342	84.3872	147.841	44.0459	26.6474	49.2705	11.7945	9.00583	1.46872	1.42433	2.75705	1.67549	0.479306
JAM	5.06438	8.80173	0.482599	0.942153	2.12031	56.6706	4.28863	0.544108	18.2817	16.173	45.0961	1.9307	0.503487	1.96076	17.3085	19.7215	0.458405	0.733536	0.379918	0.12604	26.0984	5.1259	3.85706	0.849472	19.3337	0.846411	0.658488	422.572	655.056	73.7316	22.6959	97.8408	9.3288	10.6033	14.4753	25.2514	14.4532	5.93417	5.88254	7.58674	4.4607	48.8481	1.43178	6.14284	0.150196	0.271408	0.415841	0.255552	0.0989216
ANT	0	0	0	0	0	0	0	0	0	0	0	0	0	0	0	0	0	0	0	0	0	0	0	0	0	0	0	0	0	0	0	0	0	0	0	0	0	0	0	0	0	0	0	0	0	0	0	0	0
NIC	208.047	408.109	13.178	2.20106	35.9503	1588.84	50.6371	3.48937	848.731	301.103	573.868	40.5662	10.4573	23.1651	195.446	406.091	9.23982	9.74581	5.65395	1.31074	172.354	53.6526	49.4574	52.4557	169.252	14.0641	10.4224	2049.41	17959.8	586.874	517.709	876.06	168.112	44.9201	39.7623	3918.95	1020.95	180.385	194.664	47.5442	60.2416	42.6887	19.8716	28.6336	3.89372	3.5643	5.05108	4.44048	1.78403
PAN	67.4125	130.198	1.78933	0.452078	139.646	502.419	8.90712	14.9146	370.052	29.0241	60.2126	46.1385	4.39124	4.86272	9.27572	165.595	2.01614	4.69237	1.07184	3.03908	42.7018	153.727	76.8612	2.02164	148.785	1.74106	31.7832	179.646	1458	202.767	69.2386	37.8894	25.2914	18.3671	8.12199	114.55	51.3047	9.10571	52.0012	13.3418	6.2996	74.8935	8.73865	3.64217	0.47485	60.1551	1.25605	0.448579	0.187732
PRY	211.561	413.211	30.1267	8.70958	54.2003	2117.91	224.555	13.2574	1491.59	67.6531	1755.71	713.762	21.825	76.5602	146.676	1874.64	26.8033	55.313	22.3628	7.8933	1519.06	228.124	165.892	48.8331	120.591	43.3688	28.3868	654.962	10359.6	1055.62	1398.8	333.879	619.729	20797.4	338.489	635.187	12607.8	215.603	519.866	909.024	250.471	100.42	298.906	487.861	18.9855	99.1033	30.2812	34.0647	7.61566
PER	57.1213	382.268	13.8818	2.71876	59.3491	1251.54	583.539	5.13013	1646.38	44.2273	990.574	52.1556	40.2942	73.6948	47.5573	733.04	6.56262	6.63182	6.11634	1.68883	631.613	68.1727	71.5763	20.0627	136.591	15.3221	32.218	1270.41	7369.75	1079.29	1701.2	733.44	543.077	310.548	96.8371	450.095	145.232	421.164	115.159	120.989	107.145	392.599	80.2918	51.2813	3.46764	2.15494	3.82558	7.61129	0.800969
SUR	9.12076	15.5433	0.940245	0.396069	4.4235	91.8731	12.0686	0.680729	43.5513	5.6721	206.943	8.3087	1.83849	5.22217	5.7218	95.2499	1.10712	1.44427	0.890426	0.290537	65.1253	20.5174	13.6661	2.46372	22.2117	1.71688	1.9004	50.1959	274.496	17.8621	53.8533	32.1038	11.7392	29.1862	10.1274	19.0815	15.664	7.33872	9.04889	10.1007	11.0391	139.427	2.85316	2.47919	0.339178	0.311314	1.89647	0.483793	0.250896
TTO	1.23403	1.77823	0.199919	0.186286	0.186446	9.91238	0.714476	0.0518706	5.49275	0.246632	14.6675	26.6167	0.0807555	0.348544	2.25793	6.65958	0.105538	0.107181	0.0755962	0.0240496	4.29807	0.944966	0.526274	0.528117	0.638132	0.248053	0.0908861	20.1439	239.803	6.78075	4.32085	14.1216	2.75179	5.00195	1.14036	9.82387	2.2696	1.97825	1.90775	0.935012	1.71862	0.684693	0.372337	1.11687	0.0390227	0.107063	0.058615	0.335716	0.0275254
URY	17.6439	28.986	2.885	1.30115	9.70879	160.704	39.651	2.99316	210.815	21.8849	117.31	12.9868	5.63428	8.75215	20.093	121.547	3.5045	6.50852	2.09391	1.04378	100.918	22.7793	17.2104	4.42402	62.9204	4.6484	6.26732	163.589	767.87	194.178	214.532	72.8241	61.8888	566.565	70.0329	164.923	70.4886	41.389	52.4988	27.3456	33.9251	393.661	18.5655	31.3071	2.52814	3.35384	2.32769	3.48714	1.89708
VEN	26.7974	87.8019	3.42313	0.651098	9.10835	356.282	24.7569	1.57897	254.538	8.0273	294.441	23.7656	6.02048	8.63348	26.9441	269.65	2.88386	2.5603	2.87511	0.632018	154.218	22.1933	41.7435	9.49799	158.651	4.00732	4.73578	386.691	5350.55	307.209	255.47	440.777	102.08	432.202	35.4064	343.637	64.4428	34.4652	39.9354	28.3662	37.6995	21.9489	14.9835	13.5751	1.14365	1.02958	2.70304	1.86102	0.820529
ALB	1.12002	1.06058	0.241067	0.146551	0.38391	8.33031	0.660608	0.0833993	1.44158	0.230807	5.93668	25.2855	0.446776	0.396381	0.279183	36.8787	0.329649	0.105641	0.536288	0.0549896	0.762473	0.622178	0.230717	0.394379	0.505485	0.396036	0.241332	2.17935	5.73795	1.61862	0.980833	0.870329	0.631366	0.395113	0.793049	0.638859	5.21428	0.482463	0.639619	1.43885	0.276008	0.259829	0.165994	0.14756	0.0867097	0.146592	0.105695	0.717722	0.101981
AND	0.00303368	0.00217448	0.00109442	0.000279016	0.003899	0.0108766	0.00301169	0.000713606	0.0750737	0.00185043	0.022583	0.00385858	0.00174733	0.00587269	0.00193917	0.00988414	0.0073314	0.000616749	0.00808605	0.000240319	0.00262718	0.0115015	0.00213316	0.0137353	0.00263189	0.00388672	0.00495091	0.00990675	0.0211353	0.00401006	0.00725853	0.00240521	0.00233448	0.00213528	0.00552714	0.00236708	0.0248656	0.00228467	0.00134069	0.012338	0.00196	0.00121415	0.00120525	0.000701898	0.000529051	0.000513862	0.000833862	0.000381316	0.000923079
BLR	206.041	727.593	36.2048	12.6119	248.406	3027.88	443.255	162.023	416.922	301.819	861.08	103.206	53.8313	1262.79	108.673	1099.18	966.411	71.4101	601.922	6.02392	1021.85	1312.14	61.9247	117.52	313.277	47.4441	91.8455	1030.48	1574.11	284.198	856.061	150.358	119.232	67.4682	185.387	104.73	9840.05	90.1201	144.991	273.007	99.9012	120.155	41.3906	30.3023	8.91748	19.3182	62.8867	9.7466	4.75884
BIH	10.9678	3.57252	0.248733	0.134299	1.06412	34.2241	0.654398	0.0777668	2.90612	0.457981	11.0318	1.20399	31.9873	3.05842	0.672908	37.5145	0.334715	0.242191	0.339924	0.0544447	3.02087	3.23406	0.723459	0.884427	1.8458	10.8927	0.866206	5.66442	7.96921	1.36648	1.51228	0.746545	0.441406	0.344302	0.651599	0.491452	4.34725	0.919246	2.1812	2.14483	0.414805	0.542094	0.218493	0.180264	0.0454309	0.0538721	0.0979188	0.0414101	0.0794114
ISL	0	0	0	0	0	0	0	0	0	0	0	0	0	0	0	0	0	0	0	0	0	0	0	0	0	0	0	0	0	0	0	0	0	0	0	0	0	0	0	0	0	0	0	0	0	0	0	0	0
LIE	0.0036779	0.00270843	0.00119826	0.000557416	0.00207219	0.0108716	0.00363077	0.00175836	0.00667665	0.00192922	0.00753217	0.0086381	0.00602768	0.00593503	0.00263864	0.0104203	0.00464663	0.000826274	0.00981269	0.000714551	0.0038183	0.00939156	0.00122278	0.00777473	0.00402718	0.00603558	0.00374652	0.0110861	0.0260037	0.0108428	0.00985001	0.0055674	0.00314262	0.00410553	0.0071125	0.00493249	0.158244	0.0035549	0.00260856	0.00679278	0.00346735	0.00164844	0.0021775	0.0012281	0.000658674	0.000581228	0.000900994	0.000604818	0.000794855
MCO	0	0	0	0	0	0	0	0	0	0	0	0	0	0	0	0	0	0	0	0	0	0	0	0	0	0	0	0	0	0	0	0	0	0	0	0	0	0	0	0	0	0	0	0	0	0	0	0	0
MNE	0.266942	0.331697	0.0771835	0.0510066	0.204332	0.843382	0.263522	0.13281	0.472432	0.111719	0.503201	0.691317	0.379168	0.471651	0.152554	0.744069	1.40156	0.08671	0.979442	0.0323237	0.309268	0.709582	0.085575	0.473301	0.290949	0.561705	0.273131	0.890693	1.51477	0.401768	0.638905	0.187949	0.207736	0.193247	0.450135	0.2213	12.1262	0.23309	0.117448	0.583294	0.183558	0.12047	0.154989	0.0775976	0.116299	0.13082	0.225712	0.107619	0.256414
MDA	0.754944	0.973229	0.208	0.113712	0.520178	3.0522	0.476324	0.180097	1.01614	0.239929	1.21709	0.758886	0.568158	1.13918	0.358027	1.53823	0.982539	0.349902	0.951567	0.117941	0.70716	0.995373	0.257447	3.76356	0.632202	0.614836	0.39722	1.82469	4.44921	0.966713	0.769687	0.482303	0.344568	0.43487	0.6185	0.442005	5.76833	0.521731	0.226289	1.22285	0.424556	0.316575	0.267805	0.121015	0.275332	0.312333	0.304239	0.258855	0.273396
SMR	0.000163695	8.93E-05	2.53E-05	8.41E-06	2.77E-05	0.000183249	0.000130135	4.00E-05	0.000194852	6.49E-05	0.000139844	4.80E-05	3.64E-05	0.000190202	8.49E-05	0.000160525	3.86E-05	3.26E-05	3.87E-05	2.78E-05	9.85E-05	9.26E-05	3.17E-05	6.83E-05	0.000122184	9.20E-05	5.03E-05	0.000135761	0.000350518	0.000123025	0.000153356	0.000107556	6.92E-05	0.000101925	0.00012321	0.000301019	0.000590475	0.000105687	2.81E-05	0.000110921	9.20E-05	3.26E-05	4.87E-05	4.90E-05	4.84E-06	4.39E-06	6.13E-06	5.22E-06	4.75E-06
SRB	0.379708	0.522983	0.119064	0.0778483	0.336909	1.3773	0.355413	0.1728	0.757	0.152379	0.769779	0.894362	0.914266	0.701705	0.221995	1.09427	1.96871	0.169007	1.32623	0.0455526	0.546246	1.03182	0.140858	0.783986	0.469022	0.667621	0.42462	1.40668	2.81558	0.816292	0.973201	0.38303	0.309053	0.287685	0.66685	0.189871	13.3408	0.290027	0.458942	0.935146	0.374619	0.198199	0.214443	0.102115	0.181626	0.202447	0.332965	0.162418	0.381233
MKD	5.68366	4.8582	28.4423	1.8076	2.71609	39.6921	2.2561	0.620985	8.26265	1.29415	16.1964	48.875	24.7445	7.82064	1.52131	77.2277	4.45252	0.785026	5.99122	0.295926	6.09497	10.8861	1.2822	21.3461	4.43862	15.2771	10.4413	13.2556	23.9524	8.72845	7.78561	2.35516	2.01059	2.24682	4.8542	1.68956	30.2826	3.43285	5.74666	64.4958	2.59051	1.54622	1.13518	0.688985	0.728624	0.851142	1.22919	0.552475	1.30878
UKR	310.343	216.373	116.573	16.4734	185.303	1604.15	182.022	85.0755	368.564	63.5681	402.586	87.5849	37.507	829.384	46.5663	752.21	454.41	14.0601	454.256	3.54292	306.038	707.882	34.2028	143.211	122.645	44.3367	116.273	411.434	803.05	115.498	227.986	143.921	66.3311	34.6231	158.093	39.7722	4749.82	41.2787	121.626	1093.04	63.4395	82.7243	31.9606	18.7027	6.90517	53.6004	88.9953	8.67561	8.55637
DZA	1.45158	3.92358	0.102543	0.0373846	1.48551	9.41541	0.661793	0.0272433	14.6417	0.243057	32.5538	2.65626	0.164945	0.246227	0.495725	14.2651	0.0503828	0.168915	0.0301783	0.0331494	7.10561	0.495631	0.967252	0.175771	1.71662	0.454115	0.119893	9.44865	52.9796	1.92025	4.58828	10.1852	0.909956	3.36959	0.952765	2.15197	0.72118	0.898814	2.4485	3.18822	1.436	0.367514	0.190729	0.176086	0.016774	0.0156561	0.0224503	0.0323444	0.00599438
AGO	28.6422	189.749	4.88828	1.09389	6.48692	165.068	24.8423	1.96827	187.349	8.87017	211.629	13.8642	3.4986	12.3589	14.2191	101.767	5.19205	6.47916	2.23855	1.12804	59.2935	28.4255	199.381	5.90545	20.943	4.89637	3.71025	94.0465	1346.5	375.548	2431.83	109.749	556.222	40.6228	40.1608	60.6929	65.3713	38.6516	15.6727	23.9199	132.894	13.4325	18.6944	55.8249	1.45301	1.15736	2.04081	3.59301	1.32803
BEN	1.69628	2.36625	0.276689	0.0622063	0.439777	6.25129	1.57101	0.10667	8.66076	0.408923	13.8074	0.489824	0.155879	0.69455	0.988532	8.14162	0.193627	0.346208	0.122315	0.0575526	1.14778	1.53732	4.8004	0.30964	12.0114	0.270299	0.169696	2.89258	18.2856	2.7273	3.43468	1.20974	3.12803	1.4559	120.025	2.72601	3.57408	1.53102	0.855292	3.38191	0.756811	0.473594	1.83068	1.63123	0.1399	0.0691446	0.0876415	1.11114	0.101883
BWA	0.0303683	0.0697322	0.0110083	0.00198027	0.00743569	0.405029	0.0270592	0.00223466	0.0964476	0.0100388	0.413595	0.026638	0.00658981	0.0125095	0.016711	0.235332	0.011032	0.0108033	0.00245878	0.00110408	0.821778	0.0334889	0.0463918	0.00858087	0.0255769	0.00589617	0.00394951	0.661115	0.988389	0.114595	0.0695499	0.053446	0.0470362	0.0247019	0.046757	0.0382056	0.0716885	0.0441821	0.0228893	0.0297474	0.0271923	0.408813	0.0099768	0.976917	0.00260522	0.00210923	0.00258588	0.00289034	0.00182559
BFA	0.0162779	0.0215216	0.00322076	0.000343414	0.00408938	0.077287	0.0142353	0.000905227	0.0660319	0.00248968	0.485177	0.00450895	0.00119727	0.0049433	0.00588586	0.150286	0.00137854	0.00257849	0.000856054	0.000406727	0.0222548	0.0141487	0.032695	0.00297017	0.00892282	0.00236501	0.00156305	0.0364446	0.139979	0.097709	0.0194088	0.0109664	0.019565	0.0288989	0.039193	0.0165856	0.0239143	0.00905966	0.0192827	0.00976335	0.00415395	0.00315914	0.00952144	0.0041012	0.000515789	0.000447681	0.00057321	0.000625326	0.000456706
BDI	4.36662	43.4361	0.325717	0.0925333	0.700304	62.8468	7.9719	0.134324	10.5288	1.55185	31.7304	1.36121	0.293771	1.45917	1.36632	14.5146	0.329032	0.556381	0.175636	0.107877	67.9637	3.26706	1.08742	4.89516	4.61154	0.503024	0.849233	9.69675	41.764	4.47436	5.04246	3.60747	2.94863	1.08029	2.35688	2.45236	9.47279	1.80759	5.27803	1.61617	1.25075	1.07711	0.638726	1.69478	0.132328	0.0901389	0.104104	0.128464	0.0723821
CMR	29.6647	502.241	3.29507	0.628568	21.1915	167.777	14.6264	0.611	147.264	5.04111	409.036	19.6597	12.8964	7.77212	38.7576	316.346	1.21523	4.54005	1.37947	0.448485	146.058	19.728	55.7882	5.26793	10.3883	3.86315	5.84074	366.105	170.349	28.7258	83.269	36.19	47.0133	6.96384	19.8643	14.6805	28.9177	9.51858	85.9869	54.5859	39.9843	5.80244	3.75783	6.39981	0.398624	0.428505	0.760347	1.78312	0.241939
CPV	0	0	0	0	0	0	0	0	0	0	0	0	0	0	0	0	0	0	0	0	0	0	0	0	0	0	0	0	0	0	0	0	0	0	0	0	0	0	0	0	0	0	0	0	0	0	0	0	0
CAF	43.978	125.972	6.50683	3.82117	17.7204	382.778	36.4926	2.93401	170.93	10.4331	252.292	15.6179	4.49933	19.32	24.1681	118.462	5.43069	10.4925	4.09002	1.68336	20.6669	39.9493	27.1595	7.2799	23.7739	7.69441	7.11236	57.5193	367.895	59.5531	59.8495	29.6335	66.3141	28.2989	32.6934	85.609	87.5542	31.7824	17.3419	27.5501	35.3325	10.4536	18.022	14.9973	2.09002	1.75728	2.09231	1.90737	2.10295
TCD	1.13097	1.08215	0.138011	0.0327566	0.637756	3.33881	0.763795	0.0647626	2.49338	0.191413	3.1971	0.202236	0.135491	0.513468	0.477315	2.30329	0.133065	0.236388	0.0735763	0.0294627	0.357054	1.18592	1.17032	0.152816	0.536365	0.192193	0.111026	0.908468	11.2228	1.05394	1.06983	0.454111	1.29525	0.547783	0.623286	1.55913	2.1273	0.566958	0.228726	0.474517	0.205344	0.227534	0.183114	0.273173	0.0450831	0.0402405	0.0484709	0.0392223	0.0546948
COG	16.5225	27.172	1.1203	0.402754	7.22318	84.0691	7.74245	0.40764	72.0576	2.29333	156.367	8.64866	7.42566	3.7047	4.96651	114.341	1.08088	1.52052	0.562447	0.367893	31.4639	11.0547	54.5125	2.23873	5.28862	1.4673	2.98505	52.5764	291.329	77.1256	133.529	15.1798	67.9095	11.3804	118.932	14.2863	14.0256	8.67082	7.54973	35.6333	90.9677	10.3694	6.91042	4.32726	0.313998	0.291832	0.519167	0.798072	0.31778
CIV	112.266	961.978	24.8538	2.44691	316.347	1424.7	103.993	31.7181	1193.35	82.5456	6412.32	221.296	80.304	148.942	64.7539	1525.49	8.28607	29.8389	3.88212	1.86	1131.57	527.566	297.905	59.2813	57.9885	27.5205	120.827	924.006	2319.05	280.624	200.85	244.291	54.5543	85.9624	4098.01	72.9964	534.694	122.058	123.924	102.602	26.8688	62.5813	36.7547	89.7217	2.8793	2.26294	6.3027	5.58644	1.31958
COD	70.2329	944.229	9.32929	2.53152	19.3813	361.905	51.0864	4.10003	227.359	519.046	508.702	31.3242	9.54716	27.0117	65.5397	700.005	9.12917	10.8096	4.67017	2.20845	266.915	55.2969	216.986	13.3843	45.8376	10.0873	7.24142	305.999	2728.98	603	129.746	74.8499	100.452	36.2884	60.0604	87.7772	158.274	49.9783	100.141	46.4759	22.4059	22.0794	14.4613	56.6298	2.47668	2.39547	3.17178	2.56928	2.79809
DJI	0	0	0	0	0	0	0	0	0	0	0	0	0	0	0	0	0	0	0	0	0	0	0	0	0	0	0	0	0	0	0	0	0	0	0	0	0	0	0	0	0	0	0	0	0	0	0	0	0
DOM	7.30841	94.1859	0.833717	0.293149	4.4458	148.952	4.38328	0.364104	151.35	8.24685	144.478	4.77179	0.763837	1.98031	7.66965	125.986	0.661309	0.847605	0.3578	0.214268	87.8247	7.09524	4.92144	1.33181	8.73824	2.45309	2.06966	319.028	1220.06	89.1457	31.8377	94.208	23.9849	10.5206	6.4399	31.4631	14.3386	11.2399	42.0901	15.3149	10.7241	6.84781	4.65956	4.061	0.327641	1.52741	1.10639	0.462742	0.165228
ERI	0	0	0	0	0	0	0	0	0	0	0	0	0	0	0	0	0	0	0	0	0	0	0	0	0	0	0	0	0	0	0	0	0	0	0	0	0	0	0	0	0	0	0	0	0	0	0	0	0
ETH	57.2696	199.143	64.3664	6.49413	46.293	652.815	55.4718	4.71103	222.552	31.9647	417.597	124.688	31.9056	37.7008	68.7967	385.393	11.7962	22.7204	5.7554	7.8535	207.01	75.1878	44.1407	52.7556	69.2603	15.6783	30.7505	300.364	1178.17	635.173	281.421	163.794	91.62	90.172	236	68.8483	198.438	92.2326	133.776	173.603	49.5165	53.9834	54.6321	68.7152	6.17484	5.7948	7.97009	6.14106	8.15299
GAB	10.4046	25.3237	2.12587	1.5007	5.32779	68.1574	9.30432	0.543964	68.1524	3.58041	377.958	16.569	1.78142	4.23737	11.1847	162.153	1.10637	2.30365	0.623514	0.50812	72.471	14.6274	32.411	3.11592	8.12188	1.75048	1.56855	54.4657	395.389	37.1732	177.032	17.3174	56.8971	7.4101	20.6939	16.6364	14.9036	10.767	11.1768	32.5874	11.4702	8.86866	3.74896	15.7247	0.35911	0.355301	0.573964	0.683891	0.354176
GMB	0.0252015	0.0690663	0.00382631	0.000852323	0.00322534	0.0859094	0.0171851	0.00159766	0.0423548	0.00627972	0.111667	0.00466684	0.00193224	0.00824036	0.0354308	0.0422169	0.00239995	0.00450844	0.00181299	0.000790017	0.0165903	0.0136772	0.00282859	0.00379681	0.0128177	0.00323185	0.00270412	0.122863	0.180338	0.040604	0.0277398	0.00990528	0.0308783	0.0130741	0.593882	0.0357212	0.0314918	0.0149715	0.00393376	0.0147866	0.00546229	0.00789303	0.0045585	0.0074209	0.000582636	0.000506933	0.000766341	0.00115546	0.000508033
GHA	90.6941	450.084	12.6216	3.47981	64.7488	1273.15	119.869	26.2911	413.988	48.3569	1405.45	62.025	34.7352	17.3305	122.568	1177.99	7.0508	62.4809	3.54168	3.83232	877.931	102.192	118.972	26.0076	78.9334	15.7717	36.2961	1783.3	1517.62	1972.36	820.007	145.557	104.013	23.2168	931.976	68.904	116.377	132.695	204.199	149.397	49.0029	98.8425	19.6766	37.1483	1.54768	2.14312	2.06476	4.79133	0.946954
GIN	28.8686	110.251	1.98334	0.380308	15.7778	76.6458	12.8037	0.623984	104.211	2.81804	117.436	6.35925	2.79174	5.93456	91.7172	64.0644	1.12188	1.90597	0.719706	0.609013	97.7425	23.6422	6.50149	5.55841	6.73531	1.90952	2.22384	24.9747	107.133	26.9483	17.9546	32.7619	50.8977	4.01465	50.5947	11.5926	84.1186	6.04874	15.8984	7.52541	3.98065	3.65017	2.79931	3.06555	0.362448	0.375392	33.9946	0.468616	0.332444
KEN	11.8062	106.169	2.62951	1.49498	8.67442	202.469	15.9139	1.37596	72.2924	20.0757	164.394	19.6619	2.43894	4.6577	28.862	115.743	1.47776	18.392	1.35517	0.981316	382.416	51.2173	12.9278	8.71942	30.7247	2.32034	4.79755	762.85	623.352	131.999	77.2265	43.7887	16.3683	13.5228	307.16	13.0522	196.697	30.6381	34.242	105.361	7.52203	15.66	45.962	23.2506	63.8859	0.907328	1.32359	3.62815	0.577478
LSO	0.00168063	0.00217376	0.000244653	5.85E-05	0.000287926	0.00553922	0.00134821	0.000103347	0.00428348	0.000304147	0.0111072	0.000484959	0.000131096	0.000657933	0.000888524	0.00381888	0.00018544	0.000359886	0.000125729	6.01E-05	0.000687447	0.00141289	0.000285256	0.000231119	0.000861547	0.000255982	0.000167419	0.0249758	0.0237114	0.00147686	0.00218238	0.00159126	0.00259007	0.000829075	0.00109612	0.00203908	0.0029468	0.00112148	0.00057411	0.000906101	0.000422035	0.000347737	0.000324071	0.000477252	0.000152362	0.000116961	0.000110495	0.00014578	0.000102035
LBR	10.751	24.2567	1.42819	0.539733	3.23767	230.808	9.89405	0.75966	37.4844	6.55304	67.8379	7.91195	4.19459	4.2912	9.39916	43.4551	2.39114	3.2334	0.949239	0.692706	10.7457	16.6756	4.64522	3.80037	6.67999	1.86826	1.52473	26.4165	96.2395	21.5229	28.7304	7.68541	18.6299	6.38149	35.0258	13.1566	19.2374	9.6878	9.36896	14.6662	4.56586	275.503	4.35988	6.22175	0.650638	0.816416	0.934704	0.70897	1.07746
LBY	0.0246571	0.0169107	0.00146322	0.00416341	0.00492888	0.212957	0.00454607	0.000420883	0.190279	0.00257319	0.0778442	0.0344771	0.0182026	0.00369877	0.00632238	0.521762	0.000643563	0.0119803	0.000390218	0.00229662	0.0314853	0.0082636	0.0175887	0.0036609	0.0157029	0.00430488	0.00259429	0.0766007	0.0906112	0.244462	0.0191859	0.00890547	0.0179678	0.00568591	0.0244973	0.00922693	0.0107802	0.00815138	0.0676642	0.116389	0.00354486	0.00685041	0.0053357	0.00383896	0.000195242	0.000282536	0.000456761	0.00105182	8.78E-05
MDG	56.0152	183.69	11.8363	1.02167	25.657	540.204	47.6977	22.4589	187.688	16.2464	2547.76	39.4689	15.2174	11.3743	16.3362	642.585	3.06262	8.15091	5.5658	1.0159	92.4798	46.0467	27.9933	10.2222	36.1052	5.85291	7.45243	207.06	2105.38	222.164	350.857	104.028	84.1449	33.4999	104.747	46.905	58.177	55.1974	97.8255	44.0901	49.3412	18.7913	45.3265	22.9302	3.06387	0.977348	1.22333	6.72738	0.72736
MWI	10.2137	29.0424	1.65697	0.498909	6.89967	98.2252	19.4542	0.579363	49.4346	4.79143	179.707	14.8395	2.70994	8.35278	8.40673	45.1077	1.90916	4.87094	0.781971	0.504397	226.564	26.7167	29.766	6.38786	11.5974	1.74848	2.89283	378.794	192.537	169.044	36.5583	21.2675	15.2009	5.0516	61.3827	12.7907	47.073	31.6838	14.8283	10.7573	6.31353	6.02821	10.494	269.125	0.638281	0.805251	0.944046	0.895786	0.68595
MLI	0.101412	0.144151	0.0134873	0.00272737	0.0423021	0.585543	0.0737056	0.00742052	0.403935	0.0191287	3.09459	0.0335693	0.00835423	0.0335675	0.206368	1.11	0.00923594	0.0177068	0.00548961	0.00549392	0.129137	0.288465	0.0519037	0.0226247	0.0536361	0.0136347	0.0101565	0.314847	1.00144	2.2277	0.161694	0.177915	0.159917	0.382501	0.237017	0.120297	0.17628	0.141047	0.0627297	0.108103	0.0353921	0.0373137	0.0445081	0.0404164	0.00357511	0.00300808	0.00394281	0.00496519	0.00342819
MRT	0	0	0	0	0	0	0	0	0	0	0	0	0	0	0	0	0	0	0	0	0	0	0	0	0	0	0	0	0	0	0	0	0	0	0	0	0	0	0	0	0	0	0	0	0	0	0	0	0
MUS	0.250086	0.657033	0.0296728	0.0121392	0.0930717	1.45493	0.14874	0.020701	2.21195	0.118808	15.3887	0.148918	0.0446017	0.0712895	0.239457	1.25104	0.0177156	0.0564039	0.0140745	0.012087	0.403128	0.22836	0.517969	0.0495968	0.359297	0.0452674	0.0346395	15.1622	3.10481	1.90376	0.670149	0.430257	0.268829	0.107259	0.55863	0.309186	0.339999	0.570001	0.791997	0.162623	0.128532	0.145152	0.106928	0.401812	0.0111312	0.00908505	0.0117949	0.127449	0.00803479
MAR	1.2079	5.18961	0.503047	0.0781232	1.0082	9.9403	0.443737	0.100034	41.9168	0.905148	50.9415	1.9636	0.28845	0.498909	0.895138	16.5714	0.580532	0.324677	0.0541605	0.113076	4.45437	1.28479	3.37275	0.493559	1.50301	0.159106	0.706337	10.8517	9.47664	7.37824	2.35095	3.54073	1.46795	1.39745	2.77315	1.21134	9.35512	2.18969	2.44933	6.19706	0.483843	1.16817	0.14331	0.325079	0.0170533	0.0198336	0.0373458	0.0334488	0.00486595
MOZ	204.537	315.93	28.4025	5.27674	39.3462	748.344	133.672	8.82967	690.764	33.4885	819.561	57.1998	21.0865	61.324	91.8423	631.125	20.73	24.0519	11.6652	4.45315	447.072	153.06	1271.1	41.5048	145.336	29.0171	18.9268	744.453	3080.38	1070.4	484.733	140.661	260.208	94.1548	5584.56	198.94	453.242	134.294	138.291	605.002	48.2942	53.35	41.2902	2732.1	9.27092	6.22101	8.57292	11.4702	6.09421
NAM	0.284646	0.281532	0.00804024	0.00379399	0.0315128	1.12709	0.0709364	0.00280939	3.1975	0.0249623	0.831269	0.0295399	0.00933442	0.0341287	0.0309787	0.542294	0.0184926	0.00631369	0.00335009	0.00335154	0.493187	0.135037	0.324802	0.00895312	0.0475607	0.00799742	0.0173159	0.641673	0.73588	5.51253	0.56469	0.135821	0.198474	0.0333346	0.214624	0.051784	0.432771	0.196817	0.0786791	0.033554	0.0379801	0.200498	0.035401	0.821091	0.0014687	0.00129654	0.00276297	0.00272	0.00093262
NER	0	0	0	0	0	0	0	0	0	0	0	0	0	0	0	0	0	0	0	0	0	0	0	0	0	0	0	0	0	0	0	0	0	0	0	0	0	0	0	0	0	0	0	0	0	0	0	0	0
NGA	21.9178	31.0135	0.607956	0.191377	2.96948	54.9824	3.77641	0.402685	62.1383	1.3878	91.1627	28.8201	1.79257	1.61473	4.31297	42.8847	0.705835	1.24819	0.335968	0.140153	46.4487	8.25474	100.11	0.862109	43.3714	0.631246	0.740218	54.0426	255.336	108.642	67.4736	49.6987	10.9597	35.0919	61.2379	10.1862	9.36895	35.879	51.1627	12.6193	12.1734	2.36095	45.5814	45.7186	0.113306	0.119437	0.195611	0.40342	0.0662779
RWA	1.1548	13.4159	0.166916	0.0637517	0.288941	19.8871	1.91506	0.0717399	5.52925	0.33382	7.89009	0.707765	0.192273	1.00473	0.946578	4.31941	0.301183	0.395355	0.0868293	0.111886	15.0312	1.11047	0.732384	2.94117	1.30363	0.182892	0.141274	6.73115	24.6616	1.55571	2.19697	1.00886	1.44339	0.827874	2.29865	1.38043	5.49457	1.33564	0.741604	0.867235	0.587685	0.34843	0.444027	1.25209	0.099766	0.0812971	0.0944213	0.0981613	0.0757301
STP	0	0	0	0	0	0	0	0	0	0	0	0	0	0	0	0	0	0	0	0	0	0	0	0	0	0	0	0	0	0	0	0	0	0	0	0	0	0	0	0	0	0	0	0	0	0	0	0	0
SEN	0.0647141	0.159415	0.0180646	0.00141644	0.0209598	0.469683	0.0585244	0.00295768	1.25822	0.0130919	2.24404	1.11622	0.00790973	0.0122583	0.0462278	1.60055	0.00398639	0.0185523	0.0028742	0.00217073	0.317557	0.0501141	0.194263	0.00736381	0.0395398	0.0104712	0.00516571	0.484892	0.572399	0.652314	0.100878	0.0676864	0.100438	0.0276223	0.342494	0.157306	0.0891337	0.0405652	0.124999	0.0477211	0.0156024	0.0151199	0.0297014	0.0169668	0.00260761	0.0157377	0.00302743	0.00662842	0.0015577
SYC	0	0	0	0	0	0	0	0	0	0	0	0	0	0	0	0	0	0	0	0	0	0	0	0	0	0	0	0	0	0	0	0	0	0	0	0	0	0	0	0	0	0	0	0	0	0	0	0	0
SLE	9.25401	18.4711	1.31996	0.228602	15.7855	37.8009	6.99295	0.654434	20.8446	1.72078	56.8741	31.1279	0.580867	3.64837	5.34488	21.2208	1.07632	1.07903	0.607268	0.296869	4.00739	8.05581	1.10667	1.09537	6.18754	1.79075	1.93353	10.3637	94.5467	8.76987	12.3854	77.7725	66.2601	3.98922	4.60606	11.506	18.888	4.95446	1.89249	4.75018	2.74619	2.07518	1.69269	4.8617	0.246346	0.222644	0.258095	0.269887	0.234772
SOM	0.370272	0.713394	0.0735444	0.0240061	0.107837	1.76332	0.386455	0.0312384	1.26298	0.140496	1.69505	0.271992	0.0916202	0.171578	0.280089	1.32958	0.0426786	0.123719	0.0296532	0.117908	1.2602	0.398236	0.118457	0.101836	0.296367	0.0639806	0.0538697	1.98007	9.11623	5.58651	6.90439	0.559759	2.49621	0.440129	4.58182	0.593556	0.849266	0.865673	0.306441	0.440988	0.878723	0.208957	0.55619	0.337891	0.232364	0.113182	0.0768021	0.073937	0.0189372
SDS	0	0	0	0	0	0	0	0	0	0	0	0	0	0	0	0	0	0	0	0	0	0	0	0	0	0	0	0	0	0	0	0	0	0	0	0	0	0	0	0	0	0	0	0	0	0	0	0	0
SUD	0	0	0	0	0	0	0	0	0	0	0	0	0	0	0	0	0	0	0	0	0	0	0	0	0	0	0	0	0	0	0	0	0	0	0	0	0	0	0	0	0	0	0	0	0	0	0	0	0
SWZ	8.49817	9.84254	1.26953	0.6109	2.73786	29.0617	5.69057	0.467349	81.7226	6.55673	55.6769	7.92108	3.13132	3.40604	9.49435	83.3391	2.46732	3.46738	0.650435	1.03884	15.0591	5.99162	7.93863	3.86822	4.9632	1.38795	1.51637	71.1026	171.526	162.78	40.6664	10.6707	173.597	7.07057	46.3426	13.5377	12.2145	24.5697	4.06642	9.60159	14.6484	3.68501	64.4444	30.5967	3.05772	0.994839	1.47073	3.10101	1.79332
TGO	4.1369	30.4249	1.03729	0.17089	2.20978	66.5365	9.45134	0.205357	30.8584	6.61636	72.3233	2.97476	1.96598	1.56917	3.26137	39.89	0.36919	1.04616	0.247032	0.149995	173.612	8.12666	2.56193	1.59056	3.45888	0.615131	0.604253	21.0784	34.6446	6.28135	8.55091	4.38336	4.81031	4.59888	22.1821	3.88906	6.24552	2.66446	31.8505	8.61903	1.62491	2.1916	1.97325	5.76232	0.160636	0.1478	0.177794	0.690018	0.118505
TUN	1.27151	2.33605	0.0786127	0.0923918	0.244981	6.03519	0.271265	0.0283894	5.62799	0.156648	24.0862	0.693296	0.118138	0.268882	0.322875	17.0666	0.0295616	0.595176	0.0176371	0.0437399	1.40438	0.451185	0.857337	0.230223	0.595285	0.0976035	0.145456	3.30071	4.15535	3.19796	0.712604	0.507771	0.390477	0.340388	0.889861	0.251448	0.563152	0.40379	0.98333	1.19977	0.209334	0.364542	0.279281	0.223278	0.0155691	0.0120336	0.0154141	0.0625802	0.00426136
UGA	35.4878	209.487	15.3354	2.25885	24.1631	384.573	53.5534	32.7649	236.214	33.2668	360.833	25.9533	7.55245	53.6047	18.876	211.219	8.5061	7.53086	2.42703	1.66112	967.207	216.696	63.7245	40.27	31.1022	24.9968	9.49907	428.019	423.833	83.691	76.9799	38.9709	35.9234	17.866	76.1872	28.8309	87.7108	136.589	298.999	34.7613	15.2986	18.7946	12.7651	17.7877	4.09163	1.49498	1.91586	3.11337	1.32717
TZA	135.697	900.631	68.7759	8.15594	52.9942	1853.64	105.846	3.29425	399.625	73.1842	1145.53	159.83	15.4579	82.7534	54.8725	944.352	7.24611	17.9495	4.55674	3.51601	2090.56	128.597	134.892	48.6012	103.142	12.8591	29.315	1586.59	2254.52	2431.04	950.348	188.446	259.113	55.1389	3286.58	117.247	338.96	191.119	171.074	125.005	71.268	98.5913	153.63	162.334	14.0793	4.74734	5.86513	21.7865	4.71962
ZMB	59.8114	200.561	23.3809	1.83911	27.0367	720.772	73.6466	2.79667	355.24	108.164	328.777	22.1625	10.9915	21.7582	36.2801	226.35	6.67305	11.4615	3.37608	1.59915	392.873	72.1371	206.244	11.9296	46.9553	8.92757	7.72917	1497.6	661.884	551.608	252.293	55.6325	131.51	24.5136	294.753	60.3068	101.286	96.4474	58.6643	42.4412	36.2497	54.9812	27.7981	839.342	3.08354	2.00486	2.92518	4.77173	2.28019
ZWE	11.8934	37.8092	6.19817	2.47836	7.0818	172.121	19.2329	1.26109	97.3498	10.32	94.1025	8.0006	4.31166	4.64371	17.6851	54.4343	1.6144	22.7843	1.19514	0.571898	228.562	16.0151	38.9335	6.02774	18.706	1.90372	2.41415	382.076	230.171	95.4811	59.2795	19.4585	20.485	7.50612	54.4897	12.7873	31.1602	43.0327	17.316	11.5226	8.41924	14.3819	7.72578	695.911	1.24202	1.50972	2.07951	2.99981	0.83583
BHR	0	0	0	0	0	0	0	0	0	0	0	0	0	0	0	0	0	0	0	0	0	0	0	0	0	0	0	0	0	0	0	0	0	0	0	0	0	0	0	0	0	0	0	0	0	0	0	0	0
EGY	0.0362263	0.0832725	0.0130312	0.0268031	0.0248489	0.478768	0.0201852	0.00216221	0.255859	0.0237183	0.290246	0.14724	0.0101097	0.0143312	0.0169171	0.73921	0.00551736	0.00349452	0.00201985	0.00712677	0.22797	0.045045	0.0503103	0.038108	0.0542799	0.0102565	0.00650049	0.470317	0.523682	0.147361	0.127781	0.122683	0.0610005	0.0261337	0.0658287	0.0303383	0.131223	0.0277639	0.0448009	0.164263	0.0192341	0.034679	0.0340808	0.0597704	0.000708554	0.00109612	0.00195675	0.0348748	0.000274087
IRN	0.223595	0.306262	0.0355606	0.0204735	0.0742162	1.99975	0.150702	0.0178343	1.42345	0.100869	1.45951	0.616502	0.0261399	0.0888783	0.102359	2.20239	0.0325982	0.160659	0.0133333	0.0333779	0.498079	0.175774	0.222588	0.10067	0.595762	0.0313276	0.0555183	0.591718	2.5078	2.07628	2.03601	0.315828	0.973707	0.146605	1.32375	0.236821	0.745763	0.257764	0.356842	0.972965	0.256874	0.167722	0.171618	0.693125	0.75724	0.236835	0.263165	0.0470031	0.00508522
IRQ	0.0240433	0.00362215	0.000319647	0.000138451	0.00155625	0.0176828	0.00160544	0.000130209	0.0496694	0.000840729	0.0325541	0.00589285	0.00202645	0.00100607	0.00112456	0.0448831	0.000210551	0.000524468	0.000113087	0.000240211	0.0131957	0.00161722	0.00406529	0.000555145	0.00125289	0.00043822	0.000364322	0.00672099	0.132993	0.0124266	0.0213087	0.041028	0.00844312	0.00629314	0.00384837	0.0039133	0.00598739	0.00519494	0.00136624	0.0232286	0.00366041	0.000903908	0.00152208	0.000711724	7.65E-05	6.77E-05	0.000718544	0.000194213	3.91E-05
ISR	0.388274	1.64697	0.0720161	0.262295	0.233815	3.37942	0.293046	0.0235796	1.70812	0.399779	2.77362	0.719459	0.0623345	0.188174	0.459434	1.90198	0.0386287	0.0886917	0.0391675	0.0306561	1.4297	0.428498	0.150504	0.211012	0.513746	0.0667958	0.0941863	3.78681	8.76795	0.99793	1.20595	0.96237	0.598592	0.296012	0.93164	0.459866	0.767391	1.00734	0.888769	1.3648	0.201244	0.497074	0.157953	0.515947	0.00731306	0.0156957	0.0241494	0.0141554	0.00459697
JOR	0	0	0	0	0	0	0	0	0	0	0	0	0	0	0	0	0	0	0	0	0	0	0	0	0	0	0	0	0	0	0	0	0	0	0	0	0	0	0	0	0	0	0	0	0	0	0	0	0
KWT	0	0	0	0	0	0	0	0	0	0	0	0	0	0	0	0	0	0	0	0	0	0	0	0	0	0	0	0	0	0	0	0	0	0	0	0	0	0	0	0	0	0	0	0	0	0	0	0	0
LBN	0.470877	1.39196	0.102736	0.483567	0.124277	3.32693	0.401913	0.0474574	1.79634	0.163255	3.22001	1.10114	0.0454951	0.197988	0.287778	2.18901	0.0513415	0.114771	0.0248837	0.0944668	0.583492	0.360749	0.143336	0.536482	0.528766	0.0631764	0.0478429	2.83145	8.51353	0.82568	0.799783	0.834138	0.756562	0.368367	0.72046	0.526284	1.5414	1.32896	3.57866	8.60777	0.167738	0.313624	0.27013	0.236269	0.0343944	0.372324	0.0535984	0.027857	0.018027
PSE	0.00180747	0.0013174	4.08E-05	2.80E-05	7.92E-05	0.00387842	0.000231953	2.62E-05	0.000816444	0.000146026	0.00217714	0.000145268	3.36E-05	0.000125436	0.000200845	0.00375387	4.28E-05	0.000230352	2.58E-05	0.000122648	0.00233819	0.000221455	7.33E-05	0.00018191	0.000204952	5.03E-05	3.99E-05	0.0015383	0.00588696	0.000833768	0.000548716	0.000364672	0.00233733	0.000153962	0.000558619	0.00035706	0.000934353	0.000258033	0.000444299	0.000335438	0.000136317	0.000107563	0.000160471	0.000130246	1.31E-05	1.11E-05	1.63E-05	1.50E-05	1.04E-05
OMN	0	0	0	0	0	0	0	0	0	0	0	0	0	0	0	0	0	0	0	0	0	0	0	0	0	0	0	0	0	0	0	0	0	0	0	0	0	0	0	0	0	0	0	0	0	0	0	0	0
QAT	0	0	0	0	0	0	0	0	0	0	0	0	0	0	0	0	0	0	0	0	0	0	0	0	0	0	0	0	0	0	0	0	0	0	0	0	0	0	0	0	0	0	0	0	0	0	0	0	0
SAU	0	0	0	0	0	0	0	0	0	0	0	0	0	0	0	0	0	0	0	0	0	0	0	0	0	0	0	0	0	0	0	0	0	0	0	0	0	0	0	0	0	0	0	0	0	0	0	0	0
SYR	0.170693	0.170077	0.133927	0.0999717	0.0532558	2.0359	0.065195	0.00528668	0.906616	0.0306842	0.920175	0.316563	0.0330463	0.0476073	0.0451375	2.4386	0.00884998	0.0184128	0.00486677	0.0113151	0.691291	0.074694	0.0930364	0.258566	0.0860274	0.0159219	0.0156761	0.619149	2.11848	0.237422	0.178159	0.243184	0.163589	0.323078	0.25275	0.153033	0.78528	0.115328	0.0842291	3.34784	0.0841008	0.0396426	0.0384998	0.0491499	0.00387601	0.0118973	0.0298081	0.0865793	0.00222746
ARE	0	0	0	0	0	0	0	0	0	0	0	0	0	0	0	0	0	0	0	0	0	0	0	0	0	0	0	0	0	0	0	0	0	0	0	0	0	0	0	0	0	0	0	0	0	0	0	0	0
YEM	0	0	0	0	0	0	0	0	0	0	0	0	0	0	0	0	0	0	0	0	0	0	0	0	0	0	0	0	0	0	0	0	0	0	0	0	0	0	0	0	0	0	0	0	0	0	0	0	0
tot	30926.1	45683.7	7659.37	1126.74	23780.3	193281	30699.9	10039.3	108021	137401	148600	19805.4	5823.44	17291.8	26718.3	122912	16545	4495.79	22370	646.577	64280.8	64835.4	26747	19261.4	123919	5291.7	15329.7	193827	2.49183e+06	276689	486209	555371	76983.4	2.70601e+06	130727	239017	457829	107795	24014.9	55475.4	52045	45056.1	807581	89724.7	1249.97	1826.45	5932.69	11834.3	299.169
[truncated: 140 more columns]

## Sheet: 2006
GID	AUT	BEL	BGR	CYP	CZE	DEU	DNK	EST	ESP	FIN	FRA	GRC	HRV	HUN	IRL	ITA	LTU	LUX	LVA	MLT	NLD	POL	PRT	ROU	SWE	SVN	SVK	GBR	USA	JPN	CHN	CAN	KOR	BRA	IND	MEX	RUS	AUS	CHE	TUR	TWN	NOR	IDN	ZAF	AFG	ARM	AZE	BGD	BTN
AUT	5803.94	52.1963	15.8064	1.55317	94.5238	1214.98	33.0347	3.09042	173.353	20.3279	351.873	77.7065	72.3234	119.626	32.6369	1322.95	8.72819	3.73593	7.53075	2.72684	48.4795	104.855	30.455	47.1422	56.6511	49.3303	47.3294	333.857	463.229	223.157	107.761	52.5244	34.6695	23.9924	36.6758	35.1915	125.221	40.4347	129.71	93.0953	24.8854	28.7676	12.1008	11.0458	0.664983	1.32774	1.69064	1.18945	0.498812
BEL	36.7605	2581.94	3.72986	1.49311	20.8965	581.688	33.6491	1.78839	188.19	23.8976	949.657	31.7345	5.8359	14.4946	54.7898	216.227	4.03669	2.91793	4.16097	0.889021	218.536	42.9126	29.2985	9.15148	48.8563	4.07618	6.69125	466.561	328.77	46.5883	78.7146	41.1055	22.9379	20.1812	29.1538	21.0412	67.421	39.96	38.0025	60.9954	8.12247	28.3502	8.06845	9.124	0.369836	0.879491	0.828155	0.958827	0.0829908
BGR	26.684	17.2992	2774.74	1.66949	16.7265	127.351	8.85473	1.08565	41.6747	6.07422	79.0007	270.054	11.438	15.7813	9.93269	243.836	3.1303	0.785803	2.30127	2.04301	12.0534	27.2309	8.24111	42.3948	19.3823	7.01002	5.17736	79.5455	105.582	15.9928	26.3541	13.5285	10.5709	8.29736	43.0268	8.18442	37.4601	10.2525	12.1418	300.631	8.91773	8.76913	8.22148	2.35006	1.18343	6.3195	4.16926	0.729945	0.299109
CYP	0.0528507	0.0694211	0.0177364	14.9297	0.0302958	0.19713	0.117764	0.00876671	0.0998592	0.0375965	0.105732	0.693382	0.018813	0.0888066	0.0692028	0.134141	0.00895091	0.00867248	0.0290803	0.00634756	0.0378321	0.0476314	0.0430845	0.0265831	0.102024	0.0177273	0.0192115	0.449569	0.296485	0.138364	0.130234	0.0629173	0.0679629	0.0550185	0.0800069	0.0546045	0.0840583	0.0645825	0.0413416	0.142234	0.061586	0.0834657	0.0330608	0.0181803	0.00209132	0.0217844	0.00468495	0.00346566	0.000810963
CZE	329.893	79.4496	17.7863	1.20459	3418.13	1226.08	48.7791	4.14868	128.996	20.5071	249.234	58.7711	35.7288	129.547	24.7042	371.649	12.2929	4.81434	13.1503	1.15315	62.1776	246.459	20.0248	54.2316	76.8162	32.9227	243.555	297.22	306.192	56.7265	65.1028	29.061	24.2126	16.3192	30.7993	19.3332	167.091	47.5065	48.432	38.7614	17.3827	34.0876	9.56659	9.01417	0.831321	1.36102	2.55305	1.32744	0.364683
DEU	972.617	619.357	53.068	7.37785	363.34	18738.6	396.028	16.0988	1013.68	148.982	2582.36	275.64	93.0911	248.866	206.491	1855.77	42.7633	35.8362	36.1031	5.46563	583.947	741.8	169.293	152.203	445.485	74.0358	138.084	2156.53	2692.64	372.269	599.536	258.995	169.342	135.129	217.606	158.588	739.221	208.317	654.912	430.019	135.472	198.169	52.573	70.9765	3.18411	4.61153	9.14193	6.36241	0.49429
DNK	26.8706	38.5952	2.24468	0.545768	19.3485	498.591	2597.17	2.48281	65.5688	37.552	181.629	14.0479	6.93327	21.7455	61.7791	82.3751	7.27223	3.36874	6.72774	0.454042	49.2647	53.8017	12.9312	5.53881	236.033	2.9336	7.70096	277.739	161.585	40.1472	52.3796	19.995	18.2521	8.61115	19.6604	8.87649	32.025	22.2201	27.3115	13.6746	12.4573	150.172	5.03392	4.18506	0.257301	0.279157	0.622462	0.735748	0.0863349
EST	95.6658	82.0731	8.58472	1.89324	63.7336	955.39	608.713	10091.4	180.582	1195.73	306.022	45.8835	22.9968	47.033	202.043	307.073	134.973	5.61849	251.369	2.68463	134.711	195.448	36.0889	18.0815	946.288	12.5944	33.7522	1065.35	670.131	382.955	196.618	60.7962	109.415	27.7824	88.6993	30.1422	620.195	76.8976	49.4275	62.9628	46.8538	742.075	19.8002	11.9371	2.33767	4.1402	8.9356	3.21123	3.19712
ESP	86.2138	188.544	18.8124	4.39381	52.0147	1061.57	64.378	4.49469	35241.1	46.8969	2373.68	190.492	22.713	43.2369	130.687	1201.03	9.8319	10.8331	7.79151	5.78501	139.914	155.64	1697.18	45.0408	122.049	19.9193	18.5439	1224.29	1653.47	195.55	287.754	139.884	104.346	115.864	107.442	233.117	235.636	97.342	100.639	212.138	56.3053	79.133	27.0995	35.3253	1.91724	2.48975	3.6095	4.7828	0.394199
FIN	942.78	1495.16	101.873	30.9502	386.541	10136.5	1686.91	351.236	4240.56	83160.3	5193.12	1255.59	118.667	488.293	1048.79	3871.95	176.913	79.4286	233.108	16.6229	1308.75	1646.18	441.698	204.181	3366.22	109.968	191.789	10302.6	10261.1	4548.36	2860.29	916.652	1032.58	723.476	977.506	787.374	4516.42	1265.35	791.641	1545.47	671.384	2036.98	312.556	263.46	11.2286	18.0825	31.7436	28.3156	1.94399
FRA	216.808	1054.89	24.2585	6.4237	122.713	3108.28	160.148	7.43876	2406.62	94.7926	29643.5	282.676	42.3978	103.967	225.341	2315.53	16.3846	62.6378	12.7496	5.46476	419.326	313.21	326.736	81.8466	210.246	37.1678	46.1726	2610.37	2396.38	349.706	463.35	242.558	195.747	196.241	185.857	131.989	331.841	215.895	514.615	295.675	104.206	101.48	45.8424	70.9081	2.23247	4.53625	5.48339	6.04586	0.370756
GRC	6.82988	8.2422	23.8888	14.2579	3.76238	50.7209	4.28694	0.436375	21.5281	2.77954	26.7032	2357.43	3.66616	5.04045	4.48202	79.5371	1.28533	0.897272	0.852516	1.6761	11.2795	8.47958	4.32754	18.2506	9.26122	3.70975	1.77757	40.865	48.1891	12.0047	19.2394	10.1809	8.19297	3.95081	6.7116	5.29093	13.2617	9.81804	6.57093	38.1674	4.4507	6.34959	2.39369	3.46276	0.53313	4.47875	1.01861	0.25173	0.0711313
HRV	32.7195	8.15277	3.35298	0.83029	7.19893	78.2786	7.84399	0.410664	23.0331	4.32793	30.4395	10.695	1140.27	27.7168	4.57719	240.315	0.925663	0.839084	0.688289	0.484071	5.90947	10.273	3.63308	7.7615	12.2474	60.0867	5.67922	26.2696	42.6465	11.923	12.7209	7.031	5.35622	3.68774	5.62874	4.42133	10.9397	5.41636	10.805	8.99623	4.07501	6.1134	2.23786	1.77165	0.116592	0.195355	1.20328	0.148874	0.0974387
HUN	252.265	47.2247	35.6139	1.2017	121.639	771.499	44.5136	7.35124	89.2753	19.8782	215.43	57.6165	141.798	3420.12	18.2054	399.261	14.1323	3.02651	10.2943	0.94553	42.4748	231.948	17.1547	203.622	57.5155	55.4838	116.152	190.199	206.178	41.3599	62.8037	23.5016	21.2323	13.2013	25.6539	16.1957	265.931	23.6338	43.3421	73.4818	17.7766	33.2748	8.92873	7.45593	0.550382	1.32032	2.54074	0.94739	0.407257
IRL	12.3817	47.1344	1.66192	0.827377	10.6537	218.82	28.0256	1.96302	79.0774	11.4819	144.102	9.69315	2.64687	7.05104	2311.51	73.4196	1.26061	4.25373	1.06855	0.909041	45.0295	16.7138	12.9351	4.15172	45.0629	1.68188	3.65818	1045.14	269.894	32.8111	67.8371	21.1292	16.4278	9.63139	25.8253	15.3827	30.892	25.6138	18.2194	26.0554	15.1008	33.3404	7.96965	9.72433	0.683304	0.403665	0.807563	0.717408	0.244884
ITA	37.4205	34.3839	6.52139	1.24613	14.3577	271.779	13.7308	1.03771	128.575	9.05783	265.937	60.7822	16.9968	15.5774	13.2371	5464.33	2.31601	2.05729	1.88494	1.88802	22.9017	31.3566	19.7145	19.0752	23.6872	12.3087	7.00819	172.592	249.343	42.7357	50.8658	25.9683	20.9312	15.3423	20.2846	19.9007	54.7572	25.4498	43.6189	44.7066	11.6066	11.3094	4.76418	5.4637	0.226453	0.79054	0.801874	0.72905	0.0569686
LTU	80.8515	159.466	10.8746	2.41865	69.5251	1289.19	508.84	126.497	169.1	147.834	395.308	34.1795	12.5956	40.7764	102.127	312.064	8016.15	14.1785	440.728	2.03001	168.808	385.891	26.5729	15.9978	444.436	9.71431	29.2297	721.456	791.008	67.3044	77.0029	108.189	37.4592	16.916	34.3905	26.0152	818.583	55.1753	51.1297	37.731	21.88	537.943	13.6829	9.24405	3.3573	5.27398	13.1865	3.37353	4.72106
LUX	2.44382	2.1121	0.261731	0.0738867	1.40654	40.006	1.97637	0.107411	12.1798	1.65097	90.4199	2.14197	0.440404	1.05467	3.48342	14.3595	0.236991	25.9923	0.253938	0.0619354	23.3188	3.03487	1.98262	0.647575	3.51162	0.359107	0.448005	32.1466	24.3961	3.2002	6.36485	2.94789	1.69754	1.32699	2.46019	1.46548	3.9126	2.77306	3.33801	3.89774	0.633641	1.78906	0.577891	1.29346	0.0381393	0.123892	0.087603	0.0745063	0.0343276
LVA	208.247	208.387	21.4283	10.8391	89.3196	2243.31	912.594	554.702	445.885	792.289	679.364	94.2839	25.5595	102.13	588.3	616.772	590.59	18.8109	17402.8	4.77554	237.609	529.125	61.3723	33.5287	2239.6	21.7984	48.594	4865.67	989.709	202.732	191.344	116.874	235.359	43.1956	82.8015	53.8791	574.419	78.1364	108.93	93.275	52.9785	770.008	30.0176	24.2207	10.3974	16.0597	9.4498	4.46725	5.60689
MLT	0	0	0	0	0	0	0	0	0	0	0	0	0	0	0	0	0	0	0	0	0	0	0	0	0	0	0	0	0	0	0	0	0	0	0	0	0	0	0	0	0	0	0	0	0	0	0	0	0
NLD	8.81699	38.1967	0.890751	0.219012	5.98492	143.773	9.81371	0.320922	29.3277	5.89158	86.8163	11.2025	1.61976	5.04611	11.1982	49.0671	0.953109	1.6999	0.774924	0.191464	478.315	12.8291	7.44647	2.09436	15.1401	1.24854	2.32295	95.0406	70.3114	13.4944	16.7186	7.81101	6.30424	5.29413	14.354	5.06677	14.9033	8.65478	8.53599	14.1099	3.70533	9.71584	2.049	2.05399	0.127481	0.168561	0.246736	0.340636	0.018464
POL	313.82	314.324	69.9887	3.82081	523.354	4521.16	436.918	45.2702	584.396	129.722	1380.45	112.195	96.9077	377.494	139.997	1107.63	224.321	20.8858	139.492	3.22119	266.101	17496	70.9907	271.381	651.367	58.4265	268.454	1291.64	881.971	156.029	260.666	141.86	78.5118	55.8364	91.9678	73.6111	1613.98	71.7344	186.102	236.501	63.9312	279.498	25.4459	35.3422	2.1887	4.48105	27.1723	3.66837	0.816001
PRT	147.848	154.846	13.0006	4.27858	39.5102	970.891	53.0784	3.43392	2795.46	33.2226	1546.35	119.304	22.0446	35.0946	72.8562	852.552	7.53077	8.37727	5.20805	3.89727	137.802	105.676	10087.2	25.0706	90.6597	9.69774	13.8589	803.082	1444.7	122.156	204.521	123.554	57.787	69.9974	55.3841	81.2875	116.368	137.133	104.526	147.31	40.0202	45.587	15.0537	26.9722	2.03383	1.47071	2.2432	2.25204	0.460615
ROU	91.503	38.1678	36.2945	1.3064	25.1067	400.574	17.0917	0.886637	164.241	10.7418	330.141	170.761	11.1579	106.627	15.6131	638.314	2.76727	1.16807	2.3386	1.36507	19.5988	72.6836	16.0049	7803.96	50.0754	10.4623	14.0405	178.234	208.373	211.216	127.497	25.735	16.3007	8.60106	23.7619	11.0557	39.8433	14.3667	24.0479	274.686	19.4544	26.9381	5.78988	4.24985	0.315235	1.18191	2.55295	1.05681	0.184638
SWE	1716.76	2009.68	120.04	94.6383	732.27	18964.4	7821.71	270.508	5619.03	3269.7	7721.03	1362.64	234.376	889.045	2404.55	7806.43	262.365	160.264	314.528	26.4277	3735.19	2496.8	922.008	362.492	89301.3	162.684	288.105	19364.4	12713.2	4945.27	4246.72	1188	1051.26	720.132	1494.04	793.594	2610.08	1245.13	1465.52	1901.88	1008.98	11720	465.75	509.485	10.056	18.9466	38.544	52.2312	3.57618
SVN	35.7449	5.72353	3.65189	0.281791	8.75138	100.833	6.49014	0.493338	20.8365	3.82594	35.717	8.56134	55.9086	12.3868	3.76466	118.125	0.938278	0.547955	0.929146	0.217737	4.91686	10.5091	3.61664	3.97032	8.83327	510.475	7.55019	30.0633	33.611	5.69781	7.92526	4.3675	2.89039	2.3449	4.68557	3.30467	15.1841	4.55765	6.88126	8.25418	2.79092	4.53189	1.57807	1.12401	0.333126	0.18169	0.323806	0.118486	0.0444492
SVK	262.874	61.1105	24.0687	4.06703	356.233	852.544	57.5153	3.12695	163.178	25.2999	366.995	70.1322	38.8335	345.391	35.2818	589.113	11.7975	5.1455	10.2529	1.03839	60.3312	275.94	29.8546	51.8279	104.537	37.1481	2541.34	334.63	273.318	39.002	55.0365	35.5648	19.7254	15.0909	21.589	18.2637	138.205	26.0704	40.7849	60.0292	17.7712	41.1841	8.32507	8.59602	0.959746	4.42361	2.30114	1.01494	0.683245
GBR	40.5462	140.98	6.41164	3.98824	28.8649	594.548	58.6646	4.9393	248.725	51.2667	578.75	43.8085	8.56089	25.7856	994.45	263.902	5.22825	10.0566	6.99702	11.3175	136.911	77.2497	50.6646	17.4881	106.338	5.90896	11.7887	11924.5	975.142	128.481	177.109	83.0599	87.6277	31.9662	115.803	47.8756	135.415	94.4821	72.7653	71.4507	40.3735	60.2036	25.6897	34.2289	1.17413	1.65268	3.89681	4.35678	0.311757
USA	654.135	1684.66	85.6122	21.2918	306.408	9702	525.83	35.3506	3624.54	396.601	5034.7	581.463	101.401	209.674	1308.42	5758.82	72.3199	83.9006	46.9012	27.9824	1756.47	792.328	558.322	191.383	937.201	91.1645	110.301	12430.2	1.49935e+06	12995.6	15450.7	39242	6221.54	2980.21	2997.65	28024.4	1496.22	3645.12	1251.07	2027.19	3463.65	620.795	1003.95	429.551	35.6627	30.3251	45.3096	112.866	3.70247
JPN	11.8401	29.5171	2.1046	0.332453	8.13636	191.478	10.2248	0.817545	62.9822	13.1475	96.2399	13.4286	2.81638	8.57255	17.5297	78.0355	0.973069	1.03639	0.913073	0.634108	26.3694	15.3015	7.10244	4.27493	20.909	2.05873	2.66458	172.27	1442.4	31805.9	944.351	81.0301	316.533	36.1014	76.8543	67.1494	52.5068	101.106	15.9217	29.8079	229.715	15.2073	50.5727	5.65444	1.14254	0.372494	1.08118	7.28107	0.306125
CHN	316.87	907.488	102.634	8.83063	231.566	5182.66	398.318	24.3616	1969.91	370.263	3098.5	492.951	133.217	173.383	573.113	3043.32	41.2484	33.0895	41.6731	23.2643	852.493	567.332	208.637	210.546	638.531	67.0959	80.0843	6322.92	44688.7	12620.9	304441	3513.61	5243.78	961.727	2773.13	1547.18	1969.16	2924.06	378.898	1487.26	423.152	442.417	838.711	202.852	34.2843	10.4175	69.2479	334.242	2.36984
CAN	494.556	1032.8	64.6289	26.9515	226.424	5261.14	440.673	25.749	2106.89	339.352	3722.31	507.503	81.4061	168.55	1054.12	3994.01	58.0847	65.4839	41.2828	20.3933	1248.03	433.6	305.934	163.464	892.521	61.4097	82.1872	8789.45	377508	8415.25	10534.9	496394	5069.34	3326.15	4768.96	7481.89	1124.22	2511.23	795.248	2009.21	2220.6	506.332	988.094	350.527	19.1873	25.31	29.9864	128.169	3.00341
KOR	5.13089	9.44805	1.09124	0.146481	2.8752	61.5975	6.46482	0.38621	27.4077	6.11128	32.6436	9.75923	1.30794	3.55367	7.9862	34.7773	0.584382	0.48917	0.635367	0.507853	9.44985	9.65356	3.47785	2.65873	8.03429	1.0025	2.3367	63.3844	517.348	172.378	361.551	32.8369	7226.01	16.476	75.3889	28.9947	41.7512	64.8796	6.10056	20.0233	95.2198	7.4319	21.4806	4.11357	1.08906	0.240758	0.800056	6.68269	0.0644472
BRA	1353.59	4778.47	1695.93	38.7646	784.405	21428.2	1339.14	105.645	8596.21	1604.32	14430.1	2001.9	858.013	528.74	1932.03	16346.4	260.845	235.171	359.314	69.2875	7149.89	2148.99	2451.45	1981.72	3120.04	1140.08	306.819	18331.3	92523.5	18972.5	29012.5	7510.33	7687.87	2.15977e+06	4123.13	7585.41	40673.2	3650.31	2174.82	3325.82	7541.5	1506.95	2347.54	1226.74	341.142	303.762	683.718	4394.1	8.81417
IND	16.758	47.4041	3.23131	1.19115	8.70639	160.519	17.4725	1.51151	83.0135	11.7998	105.225	23.4565	3.64518	7.55365	19.3824	119.232	2.31628	4.5601	2.17875	0.720619	44.134	21.1021	17.1426	6.58592	24.5168	4.38354	3.77909	240.031	713.108	176.844	234.531	70.2652	84.3193	32.6861	28152.3	37.2746	66.9647	61.5541	23.7377	43.389	51.8911	19.986	53.2435	29.6109	5.69385	1.80279	2.97651	105.758	9.65085
MEX	9.96686	35.6264	1.42193	0.195486	9.85182	161.454	12.1219	0.887325	86.7626	7.67999	86.2207	13.2329	2.36845	3.7867	13.2509	75.8776	1.12388	0.871134	1.74586	0.327896	24.9719	12.4073	12.8483	2.8375	14.1601	1.65079	2.50108	171.979	14312.2	459.678	140.778	507.864	91.6867	48.5849	27.4221	120636	30.1977	74.1897	15.3374	16.1927	38.8181	14.6623	13.385	4.52442	0.423551	0.568997	0.452246	1.19499	0.0849444
RUS	1858.42	2869.21	668.769	336.966	1360.51	16261.9	2131.28	3149.07	3724.95	13991.9	7285.21	2556.73	375.969	2046.29	5763.98	9110.46	1826.11	320.172	3067.95	241.571	3574.14	3441.54	582.838	945.11	3272.32	272.931	739.054	13684.4	25465	23670.4	57924.4	2280.62	7600.45	1181.77	6504.87	1102.65	346866	1501.35	1579.01	11660.2	9859.1	1547.71	1012.69	444.647	191.432	960.099	3597.49	193.996	32.4455
AUS	50.0346	115.155	8.6686	2.81859	22.6876	427.413	56.4694	3.48934	206.593	58.0973	288.012	42.5667	8.56518	19.5806	84.3257	307.994	4.59014	10.9096	5.22339	7.08015	129.073	49.1998	42.8688	16.1157	90.098	8.11856	10.2873	985.889	2944	4510.26	2122.3	327.173	1069.88	87.2791	532.693	165.877	158.073	63863.9	74.6283	87.0934	425.684	69.5289	375.875	117.805	2.33369	3.58995	4.61856	42.3397	1.51489
CHE	23.1667	12.336	1.48155	0.2197	5.43493	165.211	6.08147	0.282716	22.763	3.09589	78.4143	6.88424	1.96762	4.29814	7.30851	72.1801	0.842852	0.928677	0.426773	0.158316	10.9925	7.81966	3.86451	5.05852	6.96494	1.89566	1.87484	52.0276	91.4527	17.0477	17.7853	8.01419	6.84889	5.05383	10.5883	5.64457	11.1238	6.56297	1089.84	16.0705	3.79029	4.45537	1.83728	3.02206	0.100583	0.663667	0.387154	0.495279	0.0243476
TUR	23.8485	33.7267	60.334	12.1377	11.7323	245.651	19.4626	1.81499	102.865	10.6867	139.376	83.8784	7.87849	12.5734	26.3811	197.627	4.0817	2.95861	3.2966	2.53049	36.5243	30.9292	18.6409	70.4678	29.5725	7.86103	5.33449	232.219	284.093	42.4089	64.7569	33.0484	25.5607	12.8253	31.4971	17.4417	121.488	27.051	23.321	16448.6	13.2166	16.7915	9.01126	16.7372	2.33399	8.58065	47.4274	1.74576	0.287679
TWN	1.57208	4.43826	0.50315	0.150964	1.22365	22.6087	1.97192	0.225157	9.02774	1.55204	13.6194	2.70685	0.598216	0.948891	2.77353	13.8306	0.326487	0.220364	0.315941	0.214923	5.42519	3.03636	1.19325	0.951589	2.9504	0.387019	0.483411	29.3811	211.006	82.1807	9.3389	17.8475	32.4963	4.23814	13.0347	7.79362	10.9025	16.996	1.98196	7.53006	763.479	2.03601	6.31224	2.02312	0.0482212	0.0657994	0.0904412	0.942451	0.0216231
NOR	103.574	252.626	11.4386	5.50733	65.9346	1517.43	606.651	30.5018	389.206	163.852	681.095	102.481	20.4952	48.1013	285.548	489.265	23.845	17.8713	15.9131	5.14027	257.841	214.652	69.3102	30.221	2031.95	19.2514	26.9129	2325.86	1817.15	361.559	386.067	143.332	139.359	158.002	125.808	99.5128	213.643	130	120.493	138.229	89.298	23123.5	46.3415	41.7847	1.09265	1.73479	5.84977	5.05501	0.590482
IDN	577.026	2418.21	159.922	36.0118	464.134	9755.35	651.322	47.6457	3647.52	421.952	5014.32	851.479	125.949	248.521	815.644	5167.92	86.1355	147.504	64.5997	31.4893	3394.62	1075.47	562.217	252.075	801.874	244.176	186.948	9428.83	55211.9	31300.1	33422.2	3466.18	8779.03	2883.69	20088	1825.36	2572.29	6217.35	642.545	4418.86	10357.7	704.743	984212	719.41	106.192	150.629	38.864	3815.14	20.5238
ZAF	285.832	484.77	15.9327	5.6877	64.4486	1098.79	82.3098	6.03986	753.719	56.9944	636.588	104.416	21.3208	40.3601	229.195	784.051	8.90422	23.0677	11.8315	4.83412	252.123	129.042	97.762	30.6248	159.892	18.1808	20.371	2216.17	3141.91	3524.65	911.051	308.124	366.707	214.098	857.209	174.644	156.138	654.651	146.716	280.619	206.666	90.0803	388.492	66184.7	5.83743	4.53868	6.17554	22.6342	2.25593
AFG	0.123734	0.569367	0.0187614	0.00954734	0.104015	1.20745	0.648794	0.0168939	0.350854	0.360039	0.448127	0.0922764	0.0187181	0.0623741	0.13284	0.949393	0.0176244	0.0615589	0.0184725	0.0124142	0.170103	0.163118	0.0467362	0.0608784	0.113947	0.0238968	0.0253233	0.915285	2.92489	1.05506	0.706589	0.356239	1.10509	0.178131	16.3061	0.215177	0.759054	0.331665	0.103155	0.361321	0.357685	0.0765503	0.381823	0.154709	73.8827	0.00705658	0.00919914	0.182623	0.00807973
ARM	0.168695	0.551396	0.0339391	0.0171852	0.0744098	0.682532	0.183775	0.0280783	0.465806	0.0824951	0.440451	0.111492	0.0251799	0.117554	0.188279	0.440539	0.0741355	0.124708	0.0473973	0.0171768	0.232375	0.127079	0.0697346	0.0921191	0.131015	0.0336336	0.0472124	0.718888	3.03646	0.791329	0.644926	0.226507	1.69751	0.223377	0.61762	0.281643	7.54998	0.372219	0.306208	0.233691	0.462983	0.0821173	0.412175	0.273072	0.0148072	57.0254	0.0282626	0.013686	0.0087567
AZE	1.00832	0.979534	0.116243	0.0382827	0.44141	6.60922	0.403894	0.0798387	1.23992	0.183928	4.56881	0.520241	0.0801264	0.290031	0.371925	14.5174	0.25475	0.925198	0.298811	0.0458975	0.702596	0.789128	0.313121	0.383053	0.30369	0.120236	0.121792	1.95926	8.77011	1.41379	1.89937	0.581034	1.49637	0.431711	0.828892	0.511925	38.029	0.512446	0.344202	8.15894	0.531352	0.282688	0.401233	0.596854	0.130151	0.0771228	210.312	0.0246062	0.0108926
BGD	3.54703	7.27588	0.238994	0.0809744	0.610124	23.0841	5.88897	0.0851064	7.00665	5.26781	11.3544	2.0916	0.204063	0.487269	1.33394	23.773	0.108754	0.726123	0.0909335	0.0513738	6.38457	1.78931	0.966717	0.382356	3.92169	0.225527	0.354489	91.1365	84.6436	8.4233	16.6687	8.58438	6.19872	1.37224	67.108	1.45744	4.06516	3.46331	3.4376	2.21747	1.13761	4.39744	1.79016	1.66411	0.228985	0.0300944	0.0429056	3222.62	0.106924
BTN	1.82103	1.36299	0.331078	0.131211	0.23461	2.75235	1.80086	0.174837	3.96416	0.440587	3.13957	0.451566	0.148696	0.64395	1.19241	2.61926	0.205845	0.467425	0.170173	0.117218	0.866638	0.618064	0.391686	0.375635	0.979893	0.227611	0.20793	3.35974	17.4947	5.8821	2.1363	2.17356	8.83736	0.944117	83.7593	1.51198	4.93805	1.67464	0.426861	1.29885	0.860285	0.45501	3.47087	0.668944	0.0486155	0.0366241	0.0515186	2.5373	124.944
BRN	2.0118	2.64485	0.347054	0.116212	0.485865	7.80249	2.09164	0.21012	4.49622	0.676795	22.4018	0.909365	0.176812	1.0478	1.64629	4.66515	0.252016	0.54762	0.224239	0.129559	26.1592	1.14796	0.575313	0.762673	1.21509	0.323428	0.335385	51.1661	57.9745	101.591	36.0988	24.1632	37.7314	1.7359	5.52778	2.76206	21.399	72.0477	1.77431	1.96151	4.2993	0.85763	4.90333	2.10139	0.0559727	0.0523059	0.0967691	0.235447	0.0336928
KHM	261.343	211.798	17.544	5.60498	25.7023	818.96	186.641	12.6663	416.662	42.9603	413.519	50.2144	9.67426	58.18	144.835	294.934	15.1673	21.0597	15.6496	4.67369	157.311	61.8507	35.179	16.6974	150.568	27.3467	29.0446	893.879	6868.41	576.995	1631.22	216.361	439.176	50.0324	352.558	133.77	384.284	144.857	132.144	100.916	122.244	204.048	145.586	94.5826	2.05409	1.8175	2.86182	5.38049	1.23526
PRK	12.6215	12.7499	3.99842	0.535661	3.06743	48.2774	15.2152	1.50491	51.3519	3.624	36.6924	5.64647	1.92171	4.50379	9.75871	29.2566	1.35746	3.36575	1.21386	0.703104	14.0636	9.94402	3.4427	6.57453	7.84604	2.24146	1.74136	45.7689	305.165	382.635	2948.86	23.8803	364.141	139.758	43.2347	89.3192	51.5047	29.2825	8.25691	11.8355	11.6478	4.84381	21.1131	14.5383	0.525101	0.36531	0.820911	17.25	0.349786
FJI	1.65566	3.74771	0.3171	0.164675	1.14405	10.7817	4.53732	0.29509	5.58977	0.982592	6.85648	1.29671	0.304492	1.05108	2.64183	6.10972	0.298557	1.3521	0.32311	0.209503	3.55723	1.50955	1.38896	1.89859	1.67742	0.347044	0.511031	40.434	188.067	212.435	21.6149	11.0437	63.1997	2.81147	8.80576	5.89136	6.8641	147	1.34178	2.39853	10.3678	1.23547	10.6037	2.55476	0.217115	0.174463	0.210353	0.803297	0.205913
PYF	0	0	0	0	0	0	0	0	0	0	0	0	0	0	0	0	0	0	0	0	0	0	0	0	0	0	0	0	0	0	0	0	0	0	0	0	0	0	0	0	0	0	0	0	0	0	0	0	0
GEO	0.617858	1.02167	0.220529	0.125114	0.600998	5.67747	1.35494	0.149116	2.14347	0.216587	3.19962	1.70093	0.0876928	0.260561	0.494275	5.15201	0.269536	0.324525	0.342595	0.0588546	0.820384	0.505844	0.23483	0.445244	0.432158	0.10434	0.212799	2.48781	9.65758	4.67486	1.9626	0.772549	10.043	0.555331	1.66741	0.802564	5.70655	1.46113	0.412007	26.9083	1.02807	0.260809	1.95952	0.475697	0.137193	1.26823	0.425525	0.0505435	0.0411055
HKG	0	0	0	0	0	0	0	0	0	0	0	0	0	0	0	0	0	0	0	0	0	0	0	0	0	0	0	0	0	0	0	0	0	0	0	0	0	0	0	0	0	0	0	0	0	0	0	0	0
KAZ	8.85462	3.35341	0.911773	0.335315	7.90488	22.4027	1.71846	0.798535	14.4084	2.84425	24.9232	7.01725	0.712524	2.92824	1.22953	34.7369	0.864524	1.41485	0.946373	0.255131	3.92191	3.90038	1.96358	8.11273	2.74891	0.675544	1.46206	10.2761	31.2038	6.44024	43.5012	2.5644	6.11721	2.44684	18.4278	2.57737	77.6802	4.06297	2.88522	20.0993	4.27912	1.51005	2.73351	1.31243	1.34285	0.187127	1.19159	0.178946	0.0381012
KGZ	0.0776936	0.116358	0.0643332	0.0071535	0.0801381	0.764984	0.164766	0.0159842	0.219078	0.0378308	0.222756	0.060154	0.0139666	0.0580241	0.0687592	0.22987	0.0156727	0.0639401	0.0197965	0.00931191	0.102203	0.0739595	0.030994	0.086917	0.0646844	0.018887	0.0244071	0.408333	1.24085	0.42952	0.766449	0.0921327	1.76302	0.119629	0.391291	0.172125	1.33001	0.349445	0.0583126	0.964409	0.370629	0.045328	0.392686	0.0833927	0.0472994	0.00729587	0.0140644	0.00928484	0.00560476
LAO	251.154	300.483	45.3652	9.81168	35.0338	620.77	222.651	19.9855	385.035	58.7636	640.625	55.4814	11.4761	100.416	102.448	443.021	22.0599	34.7072	21.1292	7.21278	168.826	1950.37	188.423	36.9284	91.3868	33.7491	32.8416	608.935	1251.02	786.375	2566.3	181.916	544.754	75.6419	170.197	119.088	585.148	184.828	309.016	146.826	239.332	169.889	169.545	98.1789	2.77706	2.60022	4.73714	5.8926	1.88362
MAC	0	0	0	0	0	0	0	0	0	0	0	0	0	0	0	0	0	0	0	0	0	0	0	0	0	0	0	0	0	0	0	0	0	0	0	0	0	0	0	0	0	0	0	0	0	0	0	0	0
MYS	711.116	2287.15	115.03	69.55	499.853	7605.89	985.501	221.852	3070.85	692.381	6129.98	846.086	146.956	332.103	1255.04	4633.88	100.931	441.459	91.4892	54.2862	5019.3	847.278	563.446	365.938	1011.97	96.6511	150.27	11736.2	34039.8	26713.9	18405.1	3480.64	9931.91	1808.87	6358.74	1712.78	2001.16	5679.8	1079.92	1879.69	3667.38	833.284	9457.8	2189.96	23.1648	21.1024	31.8672	223.209	4.07024
MDV	0.0187111	0.00866684	0.00160825	0.000613225	0.00094127	0.0196286	0.0165009	0.00132213	0.0230717	0.00221378	0.0189627	0.00399118	0.000675894	0.00619775	0.00646733	0.0156183	0.00223744	0.00166599	0.0012393	0.000333423	0.00671357	0.00376995	0.00257573	0.00163557	0.00478067	0.00231976	0.000883748	0.0359021	0.0732131	0.0405575	0.00977751	0.0151137	0.0236634	0.00423303	0.00736328	0.00813066	0.0353545	0.00606949	0.00231512	0.00659528	0.00321241	0.0019864	0.00514179	0.00573224	0.000156062	0.000131314	0.000196177	0.000212484	0.000117939
MNG	0.759846	1.43587	0.253246	0.067127	0.639722	7.52501	1.90272	0.128223	2.86223	0.49897	4.06009	0.655187	0.20428	0.800384	0.950832	24.1963	0.119821	0.447483	0.143655	0.100824	1.58434	0.918095	0.369934	1.32836	0.884268	0.156101	0.364125	10.7983	49.5261	19.9655	517.913	3.01171	22.4395	1.39293	4.79809	2.20679	11.9143	3.65338	1.58328	1.70074	2.68919	0.664021	4.22936	0.824052	0.0901112	0.0676715	0.119352	0.300989	0.0717901
MMR	46.1329	110.813	4.44895	2.03103	14.287	237.804	40.3882	2.52072	87.8645	16.0744	136.725	19.3415	3.67188	56.0039	30.8177	141.686	2.71524	6.63938	3.6965	1.83116	75.3453	24.2333	17.5837	35.7412	33.0015	4.86178	10.5599	985.15	944.074	2009.68	1796.96	168.098	527.56	33.2097	14893.3	53.9722	78.6596	450.801	47.7373	41.1051	118.289	21.9942	271.352	43.504	1.27239	0.703871	1.17589	104.382	4.23278
NPL	2.9942	3.06542	0.254996	0.0860803	0.92978	11.2919	2.64397	0.16184	5.0707	0.560783	7.12754	1.20312	0.489831	0.812904	1.30819	7.13666	0.205428	1.11949	0.183437	0.0833807	1.93228	0.939652	0.643155	0.359949	1.29735	0.382705	0.227804	12.7709	41.4019	21.4049	17.8991	3.72097	5.90863	1.27633	400.432	5.77688	5.75246	2.85462	4.10548	2.25793	1.59589	0.8544	1.67202	1.69358	0.0899301	0.0390902	0.0632267	1.0511	1.4952
NCL	0.663185	1.69743	0.105116	0.0394656	0.223171	3.56658	0.623471	0.0691531	4.93609	0.767949	12.0694	0.353211	0.0903424	0.434719	1.22795	4.25393	0.0791494	0.147211	0.0790504	0.0416809	0.843971	0.496385	0.373729	0.351344	0.578874	0.120483	0.142304	3.48191	16.169	26.5092	11.0002	1.55457	6.90396	0.654196	1.98245	1.04945	2.05456	8.01313	1.20265	0.829312	2.09767	0.33264	1.23147	0.586781	0.0180698	0.0160786	0.0317306	0.0797403	0.00944237
NZL	69.9651	433.456	8.95817	6.40097	28.508	780.879	86.5663	4.86874	282.359	64.3635	399.765	51.5441	8.09821	23.6685	86.1667	502.564	5.46187	17.6669	5.70129	4.21312	274.005	47.9174	38.7363	19.751	64.9783	8.27029	10.9971	1339.87	3994.78	3293.38	3230.43	363.351	3945.83	87.371	415.199	390.927	199.349	6567.14	100.064	73.9069	517.434	56.4536	723.335	168.666	2.61314	2.22569	4.39747	12.9139	1.28369
PAK	0.563727	1.68102	0.0570303	0.0671689	0.238758	6.43386	0.70046	0.0377534	3.31111	0.232938	3.51211	0.888937	0.0945147	0.165258	0.555796	3.94704	0.0488741	0.162569	0.0363384	0.0315893	2.01816	0.455927	0.656246	0.186517	0.713247	0.0608635	0.0949682	13.7409	22.7836	3.42084	5.93217	2.42396	11.7001	0.756573	8.97237	0.73276	1.03237	2.17302	1.18583	1.92504	0.600375	0.856091	0.711083	1.40677	0.900438	0.0466457	0.0565357	0.0957029	0.00656401
PNG	37.4549	169.059	4.53673	1.29044	20.855	1103.65	50.5819	1.74097	96.2423	21.668	149.911	20.1416	3.8096	10.0097	47.9172	179.005	2.2483	3.79703	2.19489	1.50447	82.4946	20.0061	24.5893	6.85941	50.5924	3.56193	5.00906	1312.77	2524.88	5062.59	604.9	139.01	2412.66	18.6031	72.5111	49.9281	92.0141	721.867	19.4043	27.2634	73.9606	13.3705	156.699	27.7478	1.04954	0.630263	1.30969	4.48723	0.249386
PHL	32.7036	115.277	3.15359	2.07504	15.8247	448.89	31.6613	2.34131	122.378	22.416	174.912	31.2013	5.06577	11.138	46.5219	218.616	3.29579	4.20105	2.44384	2.51105	151.322	31.8891	15.2989	8.13028	41.7625	4.99369	7.60376	566.39	3606.12	3386.52	1102.68	367.456	1175.21	221.306	67.0424	80.3828	99.6054	131.376	82.9569	42.8804	100.886	38.6462	205.386	50.1752	0.78146	0.725266	0.959988	3.96793	0.23206
WSM	0	0	0	0	0	0	0	0	0	0	0	0	0	0	0	0	0	0	0	0	0	0	0	0	0	0	0	0	0	0	0	0	0	0	0	0	0	0	0	0	0	0	0	0	0	0	0	0	0
[truncated: 119 more rows]
[truncated: 140 more columns]

## Sheet: 2007
GID	AUT	BEL	BGR	CYP	CZE	DEU	DNK	EST	ESP	FIN	FRA	GRC	HRV	HUN	IRL	ITA	LTU	LUX	LVA	MLT	NLD	POL	PRT	ROU	SWE	SVN	SVK	GBR	USA	JPN	CHN	CAN	KOR	BRA	IND	MEX	RUS	AUS	CHE	TUR	TWN	NOR	IDN	ZAF	AFG	ARM	AZE	BGD	BTN
[truncated: 190 more rows]
[truncated: 140 more columns]

## Sheet: 2008
GID	AUT	BEL	BGR	CYP	CZE	DEU	DNK	EST	ESP	FIN	FRA	GRC	HRV	HUN	IRL	ITA	LTU	LUX	LVA	MLT	NLD	POL	PRT	ROU	SWE	SVN	SVK	GBR	USA	JPN	CHN	CAN	KOR	BRA	IND	MEX	RUS	AUS	CHE	TUR	TWN	NOR	IDN	ZAF	AFG	ARM	AZE	BGD	BTN
[truncated: 190 more rows]
[truncated: 140 more columns]

[truncated: 14 more sheets: 2009, 2010, 2011, 2012, 2013, 2014, 2015, 2016, 2017, 2018, 2019, 2020, 2021, 2022]
