# Supplementary material
Source: Research Square preprint supplement (doi:10.21203/rs.3.rs-8944281/v1)
Supplement: Supplementary file 3 [file a2f38d32ca45b3f9ef1a8882.xlsx]

## Sheet: Forest-relatedIndicatorinMRIO
MRIO Institution	Forest-related Indicator in MRIO Institution	Type	Unit	Data Source	Key Description	Data Links	Calculation Details	Time Coverage	Spatial Resolution	Uncertainties
Eora	Timber	Flow	metric tonnes	EWMFA Database by CSIRO; FAOSTAT Forestry Production & Trade; National statistical offices per EW-MFA guidelines (Eurostat/UN)	EW-MFA category A.1.3.1, representing the Domestic Extraction (DE) of industrial roundwood. Eora uses CSIRO's Economy-Wide MFA as a basis and references FAOSTAT and official national EW-MFA reports.	https://pubs.acs.org/doi/10.1021/es300171x https://worldmrio.com/pdf/LenzenEtAl2012_EST_MappingTheStructureSI.pdf https://worldmrio.com/documentation/indicators.jsp	1. Collect national 'Domestic Extraction (DE)' data according to EW-MFA guidelines; 2. For data reported in m³, convert to tonnes using wood density/conversion factors; 3. Use interpolation/extrapolation for missing years; 4. Mapping to MRIO: Allocate material flows to forestry/wood product-related sectors.	CSIRO EWMFA baseline is 1961–2008; Eora versions can be extrapolated/extended based on the methodology.	National-level annual physical flows (tonnes); mapped to Eora sectors.	1) Volume-to-mass conversion factors (wood species density, moisture content); 2) Discrepancies in the classification of fuelwood vs. industrial roundwood between FAOSTAT and national statistics; 3) Under-reporting of informal/self-harvested timber.
	Wood fuel and other extraction	Flow	metric tonnes		EW-MFA category A.1.3.2, representing the Domestic Extraction (DE) of wood fuel and other wood harvesting. Complements A.1.3.1 to distinguish between fuel and industrial uses.		1. Collect Domestic Extraction (DE) of 'Wood fuel'; 2. Unit conversion and scope alignment: volume-to-tonne density conversion; 3. Time series processing: use interpolation/extrapolation for gaps and cross-check with energy statistics; 4. MRIO mapping: map wood fuel to energy and household final use sectors.	CSIRO EWMFA baseline is 1961–2008; Eora versions may be updated using intensity methods or interpolation/extrapolation.	National-level annual physical flows (tonnes); mapped to energy final use/related sectors.	1) Statistical scope and conversion rates for fuelwood and charcoal; 2) Under-reporting of informal/rural household fuel collection; 3) Discrepancies during alignment with energy statistics (IEA).
GTAP	Forestland area (accessible forest)	Stock	Mha	FAOSTAT Forestry; FAO/IIASA GAEZ v4; EarthStat; GTAP LULC v11	Forestland is defined as 'accessible forest': forests within 10 km of infrastructure (including rivers). National totals are calibrated using FAOSTAT data.	https://www.gtap.agecon.purdue.edu/uploads/resources/download/12637.pdf https://www.gtap.agecon.purdue.edu/databases/v11/v11_doco.aspx?utm_source=chatgpt.com	1. Spatial base map: Based on a 5' grid global land cover map; 2. Accessible forest definition: Determined by distance <10km from infrastructure; 3. AEZ aggregation: Aggregate gridded forest area into an AEZ × region matrix; 4. National scope calibration: Proportionally scale national totals using FAOSTAT forest area data.	Time slices: 2004, 2007, 2011, 2014, 2017	5' grid base map aggregated to AEZ × region.	1) The 10 km threshold for 'accessible forest' is an approximation of accessibility; 2) Land cover classification errors and aggregation errors from grid to AEZ; 3) Scaling errors from calibrating national totals with FAOSTAT.
OECD ICIO	Agriculture, forestry and fishing (D01T02) & Wood/Paper products (C16, C17)	Flow	USD	OECD SUT/IOT Database; National Accounts; ] UN Comtrade; OECD Balanced Trade in Services (BaTIS)	Integrates forestry as an economic sector (D01T02) into the multi-regional input-output table. Reflects the output, value added, input-output relationships, and international trade flows (USD) of forestry. It is a non-ecological indicator, representing only the economic activity of forestry.	https://www.oecd.org/en/data/datasets/inter-country-input-output-tables.html https://www.oecd.org/content/dam/oecd/en/publications/reports/2023/11/development-of-the-oecd-inter-country-input-output-database-2023_3fa45b4c/5a5d0665-en.pdf	1. Collect national SUT/IOT and National Accounts data; 2. Extract bilateral trade data from UN Comtrade and OECD Balanced Trade in Services (BaTIS) database; 3. Use the BTDIxE method to allocate imports to intermediate and final demand; 4. Apply a global balancing algorithm (e.g., RAS) to ensure supply-demand consistency.	1995–latest ICIO release version.	Country × industry (ISIC aggregation, including D01T02, C16, C17).	1) Bilateral trade asymmetries and re-export handling; 2) Allocation errors from import allocation by use (BTDIxE); 3) Discrepancies in national SUT/IOT compilation standards and balancing adjustments; 4) Heterogeneity caused by sectoral aggregation.
WIOD	Forest area (kha, stock); Forestry output, GVA, employment (flow)	Mixed (Stock & Flow)	kha; M€; '000 persons	European Forest Accounts (EFA); Eurostat online codes: for_area_efa, reg_area3	Forestry economic statistics and forest resource accounts reported by member states; economic variables are aggregated according to NACE A02; forest area is aligned with FAO/FRA definitions.	https://www.rug.nl/ggdc/valuechain/wiod/wiod-2016-release https://ec.europa.eu/eurostat/statistics-explained/index.php?title=Beginners:Environment#What_are_environment_statistics_and_what_kind_of_information_do_they_provide.3F https://ec.europa.eu/eurostat/statistics-explained/index.php?title=Land_cover_statistics#Data_sources https://ec.europa.eu/eurostat/statistics-explained/index.php?title=For…	1. Member states report according to EFA guidelines; 2. Eurostat harmonizes, imputes, and flags breaks in the reported data; 3. Economic variables are aggregated by NACE A02; 4. Published externally via Eurostat data tables.	Annual (depends on member state reporting schedules and Eurostat releases).	EU, member states; some indicators available at NUTS regional level.	1) Reporting differences and imputation; 2) Proportional scaling errors from alignment with FRA; 3) NACE A02 boundary differences; 4) Allocation errors at the regional (NUTS) scale.
	Land use – share/area of land used mainly for forestry	Stock-like	% 或 kha/ha	LUCAS in-situ area frame survey; Eurostat dataset code: lan_use_ovw	In-situ sample survey based on 'land use' classification, which can be extrapolated to national/regional levels. The 2018 and 2022 survey rounds are commonly used.		1. Design a nationally representative area-frame sampling grid; surveyors determine the 'main use' on-site; 2. Use sampling weights to extrapolate sample points to national and NUTS proportions/areas; 3. Conduct consistency checks against previous rounds and external products.	Key rounds: 2018, 2022 (earlier rounds from 2006).	Sample point level (in-situ), extrapolated to national and NUTS levels.	1) Sampling error; 2) On-site determination and classification bias; 3) Changes in definitions across survey rounds; 4) Uncertainty in extrapolating from sample points to regions.
EXIOBASE	Forest area	Stock	1000 ha	FAO Global Forest Resources Assessment (FRA)	A global forest cover spatial baseline map, used to spatialize national area data.	https://fra-data.fao.org/	1. National reporting + remote sensing cross-validation: Countries report area according to a unified FRA template and terminology; 2. FAO conducts quality checks, imputation, and supplements with validation from remote sensing sample interpretations.	1990–2025 (5-year assessment cycles)	National level	1) National reporting bias; 2) Definitional differences; interpolation errors.
	Hybrid global forest cover map	Stock-like	Area (ha) / class	IIASA Geo-Wiki	National-level forest area statistics, serving as a time-series baseline for land accounts.	https://geo-wiki.org/	Multi-source fusion: Generates a global forest cover baseline map for circa 2000 based on remote sensing (e.g., MODIS, Landsat), crowdsourced validation (Geo-Wiki platform), and calibration with FAO statistical data.	Baseline year ~2000	Global, ~1 km resolution	1) Remote sensing classification errors; 2) Scaling errors introduced by calibration with national statistics; 3) Aggregation errors.
	Intact Forest Landscapes (IFL)	Stock-like	Area (ha) / class	Intact Forest Landscapes	Used to classify forests into 'used' and 'unused/intact' states.	https://www.intactforests.org/	Remote sensing interpretation: GFW and other organizations conduct GIS analysis based on remote sensing imagery (e.g., Landsat) to identify large forest areas undisturbed by significant human activity (roads, settlements, etc.).	2000, 2013, 2016, 2020	Global, 30m (derived)	1) Choice of thresholds for the 'intact' definition; 2) GIS processing errors; remote sensing image quality.
	Industrial roundwood & Wood fuel	Flow	m³	FAOSTAT – Forestry Production and Trade	Used to quantify the physical flow of timber harvesting, distinguishing between industrial and fuel uses.	https://www.fao.org/faostat/en/#data/FO	JFSQ annual report + trade reconciliation: Based on national data from the Joint Forest Sector Questionnaire (JFSQ), balanced against customs trade data; charcoal and other products are converted using conversion factors.	1961–present (annual)	National level	1) Under-reporting of illegal/informal logging; 2) Discrepancies in the classification of fuelwood vs. industrial roundwood; 3) Volume-to-mass conversion factors.
	Percent Tree Cover (MOD44B)	Stock-like	%	NASA LP DAAC / MODIS VCF	Used for spatial consistency checks and validation of forest area estimates.	https://lpdaac.usgs.gov/products/mod44bv006/	Remote sensing product: Based on MODIS satellite sensor data, uses a regression tree model to estimate the percentage of each pixel covered by tree canopy.	2000–present (annual)	Global, 250 m resolution	1) Sensor saturation (in high-density forests); 2) Cloud/aerosol contamination; 3) Mixed pixel effects.

## Sheet: EnvironmentalSatelliteAccounts
Indicator Name	Description	Calculation Method	Accuracy and Uncertainty	Data Source	Links
Forest Land	Records the physical area of forests, often used to measure forest cover and its changes.	Statistics are compiled according to a unified standard (e.g., FAO FRA) definition of forest area, which must meet criteria for tree height, canopy cover, and land use. The unit is hectares (ha) or square kilometers (km²).	Accuracy: Depends on the quality of remote sensing data and national forest inventory reports. The accuracy of remote sensing data is affected by cloud cover, resolution, and classification accuracy.	FAO Global Forest Resources Assessment (FRA), National Forest Inventory (NFI).	https://www.fao.org/forest-resources-assessment/en/
Timber Harvest	Quantifies the amount of timber harvested from forests annually, usually distinguished between industrial roundwood and fuelwood.	Timber harvest is estimated from national forest inventory data reported by countries or through remote sensing data. The unit is cubic meters (m³) or tonnes.	Accuracy: Depends on the accuracy of national reports, especially regarding the under-reporting of illegal or self-harvested timber. Different countries may have discrepancies in statistical methods and data reporting.	FAO, National Forest Inventory, Remote Sensing Monitoring.	https://www.fao.org/faostat/en/#data/FO
Wood Fuel and Other Extraction	Quantifies the amount of fuelwood and other wood resources collected from forests.	The amount of fuelwood collected is estimated from national forest production and trade reports, remote sensing data, and national forest inventory data. The unit is tonnes.	Accuracy: Similar to timber harvest, it depends on the accuracy of national reports and is affected by informal wood collection (e.g., household collection).	FAO, EWMFA, National Statistical Offices.	https://www.fao.org/faostat/en/#data/FO
Human Appropriation of Net Primary Production (HANPP)	Measures the biomass extracted from ecosystems by human activities, such as agriculture and forestry.	Calculation Method: Net Primary Production (NPP) is the new biomass produced annually by plants through photosynthesis. HANPP measures how much NPP is appropriated by human activities. The unit is tonnes of Carbon.	Accuracy: The accuracy of model calculations depends on regional and global-scale ecological data and involves various assumptions and extrapolations.	EORA, EXIOBASE, FAO.	https://www.exiobase.eu/
Forest Cover Percentage	Estimates the forest cover rate (tree canopy cover) using remote sensing technology.	Analyzes the percentage of tree canopy cover through remote sensing imagery. Typically uses MODIS or Landsat data. The unit is percentage (%).	Accuracy: Affected by the resolution and classification algorithms of remote sensing data. High-density forest areas may cause sensor saturation.	NASA MODIS, FAO.	https://www.bing.com/search?q=MODIS+VCF+Data%2C+NASA+Earthdata&form=ANSPH1&refig=691f2b9be168412390e75f682a7df6d6&pc=U531
Forest Carbon Stocks	Quantifies the carbon stocks in forest ecosystems, reflecting the role of forests as carbon sinks.	Carbon stocks are estimated by combining remote sensing and ground data, usually based on tree biomass (inferred from indicators like tree height and density). The unit is tonnes of carbon.	Accuracy: The measurement accuracy of remote sensing data is relatively high, but it is still affected by differences in forest species, forest types, and regions.	FAO, NASA, Lidar satellite data.	https://www.fao.org/forest-resources-assessment/en/
